# Supplementary material for: Integrating Peak Colocalization and Motif Enrichment Analysis for the Discovery of Genome-Wide Regulatory Modules and Transcription Factor Recruitment Rules
Source: Front Genet. 2020 Feb 21;11:72. doi: 10.3389/fgene.2020.00072 (PMC7046753; doi:10.3389/fgene.2020.00072)
Supplement: Supplementary Table 1 — List of ENCODE identifiers of the ChIP-Seq datasets employed in this study. [file Table_1.xlsx]

## Sheet: Encode datasets
Cell_line	FILE ID	tag	TF_name
K562	ENCFF002CMJ	no	SPI1
K562	ENCFF002CVM	no	ATF1
K562	ENCFF002CVP	no	BDP1
K562	ENCFF002CVR	no	BRF1
K562	ENCFF002CVS	no	BRF2
K562	ENCFF002CVU	no	CCNT2
K562	ENCFF002CVW	no	FOS
K562	ENCFF002CWR	no	GTF2B
K562	ENCFF002CWT	no	HMGN3
K562	ENCFF002CXG	no	NELFE
K562	ENCFF002CXT	no	POLR3G
K562	ENCFF002CXU	no	RAD21
K562	ENCFF002CXW	no	POLR3A
K562	ENCFF002CXZ	no	SIRT6
K562	ENCFF002CYL	no	GTF3C2
K562	ENCFF002DDJ_ENCFF002DBD	no	CTCF
K562	ENCFF007DKB	eGFP	PTRF
K562	ENCFF010MMQ	no	ARHGAP35
K562	ENCFF010STZ	no	HNRNPL
K562	ENCFF011KRN	no	SMAD2
K562	ENCFF012VES	no	NFYA
K562	ENCFF019PEL	no	ELK1
K562	ENCFF033EBX_ENCFF002CMM	no	SIX5
K562	ENCFF033KXY	no	SNRNP70
K562	ENCFF034CQR	no	TAF7
K562	ENCFF034PQD	no	DNMT1
K562	ENCFF036YVI	eGFP	TSC22D4
K562	ENCFF041YQC	no	SMC3
K562	ENCFF042RAK	no	KDM4B
K562	ENCFF048OIZ	no	BMI1
K562	ENCFF049CRW_ENCFF646VQW	no	TRIM24
K562	ENCFF057ZUY	no	BCOR
K562	ENCFF059WVE	no	SRSF7
K562	ENCFF062ARS	no	CBX5
K562	ENCFF074EZL	no	NBN
K562	ENCFF076YZO	no	ETS1
K562	ENCFF077UYM	no	JUN_3
K562	ENCFF083YCQ	no	E4F1
K562	ENCFF096XMD	no	RAD51
K562	ENCFF099SDW	no	MYC_2
K562	ENCFF106DAY	no	E2F1
K562	ENCFF113PMT	no	NFYB
K562	ENCFF114IWY	no	ZNF143
K562	ENCFF114PTZ	no	SMARCC2
K562	ENCFF116DIO	eGFP	ZNF148
K562	ENCFF117EWO	no	CSDE1
K562	ENCFF120IDE	no	RBFOX2
K562	ENCFF122QSN	no	HNRNPLL
K562	ENCFF126BCK	no	GMEB1
K562	ENCFF134CUM	no	PHF21A
K562	ENCFF137IBM	no	SRSF9
K562	ENCFF142CPK	no	FUS
K562	ENCFF144PPR_ENCFF493ABN	no	NRF1
K562	ENCFF150VTD	no	USF2
K562	ENCFF152VMJ	no	CTBP1
K562	ENCFF157UUF	no	NFRKB
K562	ENCFF163VUK	no	ZKSCAN1
K562	ENCFF165BCW_ENCFF366UBB	no	NCOR1
K562	ENCFF167HYX	eGFP	GTF2A2
K562	ENCFF168HAG	eGFP	PBX2
K562	ENCFF173NRW	eGFP	ZNF644
K562	ENCFF175IIE	no	NR2F1
K562	ENCFF175IUO	eGFP	NFE2L1
K562	ENCFF176NOI	eGFP	ILK
K562	ENCFF178MOP	no	SMAD5
K562	ENCFF179NDS	no	BHLHE40
K562	ENCFF186QUP	eGFP	VEZF1
K562	ENCFF191MPD	no	SIN3A
K562	ENCFF192BTP	no	JUN_0
K562	ENCFF195ODE	no	ZHX1
K562	ENCFF196DHR	eGFP	IRF9
K562	ENCFF206YXX	no	POLR2A_0
K562	ENCFF209HKW	no	RLF
K562	ENCFF209JJD	no	RBM39
K562	ENCFF209MQX	no	TEAD4
K562	ENCFF213EPU	no	ESRRA
K562	ENCFF225MPC	no	ARID1B
K562	ENCFF225TLP	no	E2F4
K562	ENCFF226CZE	no	MCM2
K562	ENCFF235ZZP	no	ASH1L
K562	ENCFF237UAN_ENCFF010UHD	no	RFX1
K562	ENCFF241TBP	no	SOX6
K562	ENCFF246HIU	no	YBX3
K562	ENCFF248AOD	eGFP	ZNF766
K562	ENCFF249EZR	no	TCF7
K562	ENCFF253FON	no	ZBED1
K562	ENCFF253FZN	no	GATAD2A
K562	ENCFF253NXR	no	ZSCAN29
K562	ENCFF254MPF	no	STAT1_0
K562	ENCFF255EOB	no	NR2F2
K562	ENCFF257RYT	eGFP	MEF2D
K562	ENCFF262BVP	no	TOE1
K562	ENCFF265LKN	eGFP	HINFP
K562	ENCFF270QAB	no	POLR2A_3
K562	ENCFF273EYJ	no	POLR2G
K562	ENCFF273TYA	no	ZNF592
K562	ENCFF280GTU	no	SIN3B
K562	ENCFF284LRP_ENCFF482CEV	no	TAL1
K562	ENCFF284VUQ	no	IRF1_3
K562	ENCFF289BUU	no	NUFIP1
K562	ENCFF290HTJ	no	STAT1_3
K562	ENCFF292JRY	no	HNRNPH1
K562	ENCFF294EHN	no	SETDB1
K562	ENCFF294HEI	no	PRDM10
K562	ENCFF294VWT	no	THRAP3
K562	ENCFF296CNQ	no	POLR2AphosphoS2
K562	ENCFF300XUA	no	SP1
K562	ENCFF308IXJ	no	MAFF
K562	ENCFF310AGG	no	E2F7
K562	ENCFF312RFN	no	TCF7L2
K562	ENCFF314ULQ	no	L3MBTL2
K562	ENCFF315YAF	no	SMAD1
K562	ENCFF322DSX	no	NCOA6
K562	ENCFF332DRG	eGFP	PTTG1
K562	ENCFF332ICQ	no	ARID2
K562	ENCFF334FMW	no	USF1
K562	ENCFF337DKJ	no	JUND
K562	ENCFF338HQY	no	DDX20
K562	ENCFF344QKL	no	ZNF274
K562	ENCFF350YXB	no	MTA3
K562	ENCFF356ASJ	eGFP	E2F5
K562	ENCFF360BTO	no	AFF1
K562	ENCFF365NKO	no	MIER1
K562	ENCFF368TYM	no	KDM5B
K562	ENCFF370ENX	no	NFIC
K562	ENCFF379MPS	no	RBBP5
K562	ENCFF380FJL	no	TBP
K562	ENCFF384YDT	no	IRF2
K562	ENCFF386WKY	no	ZNF280A
K562	ENCFF387LTN	no	MYC_1
K562	ENCFF388AJH	eGFP	IRF1
K562	ENCFF388YOB	eGFP	ZNF395
K562	ENCFF396DNK	no	ZFP91
K562	ENCFF396GUH	eGFP	ADNP
K562	ENCFF396NSO	no	HLTF
K562	ENCFF398EQF	no	U2AF2
K562	ENCFF404YMX	eGFP	ETV1
K562	ENCFF408FQC	no	ZBTB33
K562	ENCFF408SNO	eGFP	DIDO1
K562	ENCFF415YPX	no	ILF3
K562	ENCFF417DTI_ENCFF917COW	no	E2F6
K562	ENCFF417LEJ	no	ZBTB40
K562	ENCFF417QAJ	no	JUN_2
K562	ENCFF421KIV	no	PYGO2
K562	ENCFF423EMU	no	BACH1
K562	ENCFF426DUB	no	JUNB
K562	ENCFF433RKB	eGFP	ZFX
K562	ENCFF434QZL	no	ZBTB11
K562	ENCFF447QUG	eGFP	ZNF512
K562	ENCFF452SPE	eGFP	FOXJ2
K562	ENCFF455TDM	no	CBX3
K562	ENCFF456PQY	no	CBX8
K562	ENCFF462FRU	no	PHB2
K562	ENCFF465JKF	no	MYC
K562	ENCFF470MLY	no	MBD2
K562	ENCFF473GCH	no	FOSL1
K562	ENCFF474NLG	no	HCFC1
K562	ENCFF478MPX	no	SAFB
K562	ENCFF481WGW	no	SKIL
K562	ENCFF484CKD	no	RCOR1
K562	ENCFF484DKT	no	CBX1
K562	ENCFF484HCG	no	SUPT5H
K562	ENCFF494ZUY	no	SNIP1
K562	ENCFF495CSO	no	NCOA4
K562	ENCFF495MHZ	no	NFE2
K562	ENCFF497XOD	no	MITF
K562	ENCFF498DOQ	no	STAT1_1
K562	ENCFF502KHR	no	ELF4
K562	ENCFF511OXK	no	LARP7
K562	ENCFF511QHY	no	ZMYM3
K562	ENCFF517KRT	no	GABPB1
K562	ENCFF517YCC	no	CUX1
K562	ENCFF521CRG	no	ZFP36
K562	ENCFF522JRK	no	ZC3H11A
K562	ENCFF522JUV	no	RBM22
K562	ENCFF526HLP	no	DACH1
K562	ENCFF529FWJ	eGFP	ZKSCAN8
K562	ENCFF542DOG	no	POLR2AphosphoS5
K562	ENCFF544XKC	no	PKNOX1
K562	ENCFF545VNY	no	ETV6
K562	ENCFF549GMO	no	BRCA1
K562	ENCFF549KOD	no	GATAD2B
K562	ENCFF549TYR	no	EP300
K562	ENCFF558DSF	no	HMBOX1
K562	ENCFF561IZB	no	TRIP13
K562	ENCFF561USY	no	ZBTB2
K562	ENCFF573GQX	no	JUN_1
K562	ENCFF577UJR	no	MEF2A
K562	ENCFF580DYE	no	HDAC3
K562	ENCFF580QGA	eGFP	RELA
K562	ENCFF581YKY	no	NEUROD1
K562	ENCFF581ZZT	no	ZNF282
K562	ENCFF582YPB	no	CREB3L1
K562	ENCFF583DZD	no	MYNN
K562	ENCFF583GKE	no	CCAR2
K562	ENCFF588OLK	no	ZZZ3
K562	ENCFF589EVD	no	ZBTB8A
K562	ENCFF594LCH	no	NR2C2
K562	ENCFF597DIY	no	ZMIZ1
K562	ENCFF602AXP	eGFP	ZNF589
K562	ENCFF613RNG	no	MEIS2
K562	ENCFF617CAZ	no	TAF15
K562	ENCFF619BDC	eGFP	TEAD2
K562	ENCFF622RBW	no	SMARCE1
K562	ENCFF624NUZ	no	SAFB2
K562	ENCFF626KTJ	no	PHF8
K562	ENCFF626MVT	no	TBL1XR1
K562	ENCFF629BFI	no	JUN
K562	ENCFF632NQI	no	GATA1
K562	ENCFF634AYU	no	MYC_0
K562	ENCFF641LJY	no	THAP1
K562	ENCFF642BNC	no	CBFA2T2
K562	ENCFF643TEZ	no	CDC5L
K562	ENCFF648NYF	no	STAT1_2
K562	ENCFF654BMD	eGFP	ZNF83
K562	ENCFF659WAF	no	LEF1
K562	ENCFF662YQK	no	POLR2A_1
K562	ENCFF664ZGR	no	NR2C1
K562	ENCFF665FHC	eGFP	CREB3
K562	ENCFF666LZV	no	BRD9
K562	ENCFF670ZCR	no	MGA
K562	ENCFF671BFH	no	THRA
K562	ENCFF671DOL	no	UBTF
K562	ENCFF676NPW	no	HES1
K562	ENCFF676YJE	no	MYC_3
K562	ENCFF679ITJ	no	MCM3
K562	ENCFF680WBN	no	RBM25
K562	ENCFF682SIY	no	RBM14
K562	ENCFF684MLP	no	COPS2
K562	ENCFF694BIA	no	PTBP1
K562	ENCFF696KPD	no	STAT5A
K562	ENCFF699ZII	no	FOXM1
K562	ENCFF701MXF	eGFP	TFDP1
K562	ENCFF706ISJ	no	ZBTB7A
K562	ENCFF706LIT	no	YBX1
K562	ENCFF706SJZ	no	ZNF384
K562	ENCFF710IEF	no	ATF4
K562	ENCFF712AXK	no	NR2F6
K562	ENCFF714VIT	no	STAT2_1
K562	ENCFF714XHL	no	BRD4
K562	ENCFF716LRI	no	RFX5
K562	ENCFF717TWA	eGFP	KLF1
K562	ENCFF718NUA	no	SAP30
K562	ENCFF721LDD	eGFP	ZNF175
K562	ENCFF722XRW	no	SRSF3
K562	ENCFF730RUF	no	IRF1_1
K562	ENCFF730URE	no	U2AF1
K562	ENCFF732HOE	no	GATA2
K562	ENCFF744SVC	eGFP	ZNF354B
K562	ENCFF757ODD	no	SFPQ
K562	ENCFF768TJI	no	HNRNPUL1
K562	ENCFF769GYG	no	MTA1
K562	ENCFF772HOY	eGFP	ETS2
K562	ENCFF772QPO	no	KAT8
K562	ENCFF774QKS_ENCFF823SYE	no	DPF2
K562	ENCFF776YPS	no	NONO
K562	ENCFF777CWV	no	HNRNPK
K562	ENCFF778RMG	eGFP	GTF2E2
K562	ENCFF782GWS	no	RBM34
K562	ENCFF785ACI	no	PRPF4
K562	ENCFF785HXY	no	TAF9B
K562	ENCFF786WZD	no	DEAF1
K562	ENCFF798URE	no	SRSF1
K562	ENCFF799HIG_ENCFF422NGZ	no	MAX
K562	ENCFF801YZV	eGFP	POLR2H
K562	ENCFF802XZN	eGFP	KLF13
K562	ENCFF803LEC	no	XRCC3
K562	ENCFF806BDC	no	EHMT2
K562	ENCFF809OEX	no	ZC3H8
K562	ENCFF809YFY	no	FOXA1
K562	ENCFF812QPN	no	MAFK
K562	ENCFF813LOW_ENCFF429XKT	no	CEBPB
K562	ENCFF815TTY	eGFP	ZNF584
K562	ENCFF820EVZ	no	EWSR1
K562	ENCFF822FWM	no	TAF1
K562	ENCFF833FCO	no	GABPA
K562	ENCFF834WGJ	eGFP	ZNF507
K562	ENCFF835KAT	no	ARID3A
K562	ENCFF835YLR	eGFP	ID3
K562	ENCFF836VRV	no	AGO1
K562	ENCFF838COI_ENCFF738WCE	no	KDM1A
K562	ENCFF841YFF	no	STAT2_0
K562	ENCFF844HBQ	no	KLF16
K562	ENCFF853TZC	eGFP	ZNF197
K562	ENCFF853ZMA	no	POLR2A_2
K562	ENCFF859FVX	no	CHAMP1
K562	ENCFF859NPS	eGFP	NR4A1
K562	ENCFF861YKK	no	RBM17
K562	ENCFF868QLL	no	ATF7
K562	ENCFF872JJJ	no	POLR2B
K562	ENCFF874QUM	no	CC2D1A
K562	ENCFF877ANE	no	MYBL2
K562	ENCFF881QBT	no	PML
K562	ENCFF881XQF	no	PCBP2
K562	ENCFF883WYX	no	FIP1L1
K562	ENCFF891MVM	no	ZNF263
K562	ENCFF906PGD	no	NKRF
K562	ENCFF908UIY	no	IRF1_2
K562	ENCFF909LKK	no	IRF1_0
K562	ENCFF920RYJ	no	MCM5
K562	ENCFF921WMN	no	ZNF318
K562	ENCFF925ANU	no	EP400
K562	ENCFF925DJG	no	E2F8
K562	ENCFF925MHB	no	CEBPZ
K562	ENCFF926FUM_ENCFF328XKC	no	YY1
K562	ENCFF927JBT	eGFP	MAFG
K562	ENCFF939ZFS	eGFP	HDAC8
K562	ENCFF941RVL	no	PCBP1
K562	ENCFF944GJH	no	SMARCB1
K562	ENCFF948TXN	no	CREM
K562	ENCFF948YVM	no	PHF20
K562	ENCFF954NAJ	no	NR0B1
K562	ENCFF958KNK	no	ATF3
K562	ENCFF962FQM	no	CTCFL
K562	ENCFF962VSZ	no	KHSRP
K562	ENCFF968KBN	no	ATF2
K562	ENCFF970LCB	no	MXI1
K562	ENCFF971VJZ	no	RBM15
K562	ENCFF973OME_ENCFF059ONJ	no	MNT
K562	ENCFF975IRM	no	RB1
K562	ENCFF985TSH	no	SREBF1
K562	ENCFF986MHU	no	NFXL1
K562	ENCFF990CFV	no	POU5F1
K562	ENCFF993GXU	no	CBFA2T3
K562	ENCFF995NIE	no	SMARCA5
K562	ENCFF996IVU	no	ZNF830
K562	ENCFF996ZGL	no	C11orf30
K562	ENCFF998HOR	no	HDAC6
K562	ENCFF998KKJ	no	XRCC5
