# Supplementary material for: Integrating Peak Colocalization and Motif Enrichment Analysis for the Discovery of Genome-Wide Regulatory Modules and Transcription Factor Recruitment Rules
Source: Front Genet. 2020 Feb 21;11:72. doi: 10.3389/fgene.2020.00072 (PMC7046753; doi:10.3389/fgene.2020.00072)
Supplement: Supplementary Table 2 — Results of the peak/summit overlap step between all pairs of ENCODE datasets in the K562 cell line. [file Table_2.xlsx]

## Sheet: Pairwise all vs all
Cell_line	TF_exp_A	TF_exp_B	TF_name_A	TF_name_B	TF_A_peaks	TF_B_peaks	Overlapping_peaks	expected_value	p-value_Poisson	Corrected p-value
K562	ENCFF836VRV	ENCFF836VRV	2001-08-01	2001-08-01	11428	11428	11428	522	0	0
K562	ENCFF836VRV	ENCFF396GUH	2001-08-01	ADNP	11428	21217	97	969	7.22622e-284	7.82173e-279
K562	ENCFF836VRV	ENCFF360BTO	2001-08-01	AFF1	11428	20613	546	942	3.76914e-45	4.07976e-40
K562	ENCFF836VRV	ENCFF010MMQ	2001-08-01	ARHGAP35	11428	5027	183	229	0.000205724	1
K562	ENCFF836VRV	ENCFF225MPC	2001-08-01	ARID1B	11428	50204	614	2294	0	0
K562	ENCFF836VRV	ENCFF332ICQ	2001-08-01	ARID2	11428	11835	382	541	9.77489e-14	1.05804e-08
K562	ENCFF836VRV	ENCFF835KAT	2001-08-01	ARID3A	11428	11550	193	527	3.98543e-63	4.31387e-58
K562	ENCFF836VRV	ENCFF235ZZP	2001-08-01	ASH1L	11428	8152	431	372	0.000224525	1
K562	ENCFF836VRV	ENCFF002CVM	2001-08-01	ATF1	11428	14864	477	679	4.81621e-17	5.21311e-12
K562	ENCFF836VRV	ENCFF968KBN	2001-08-01	ATF2	11428	46506	355	2125	0	0
K562	ENCFF836VRV	ENCFF958KNK	2001-08-01	ATF3	11428	59815	482	2734	0	0
K562	ENCFF836VRV	ENCFF710IEF	2001-08-01	ATF4	11428	42275	299	1932	0	0
K562	ENCFF836VRV	ENCFF868QLL	2001-08-01	ATF7	11428	47113	2527	2153	3.50386e-16	3.79261e-11
K562	ENCFF836VRV	ENCFF423EMU	2001-08-01	BACH1	11428	4708	175	215	0.000565558	1
K562	ENCFF836VRV	ENCFF057ZUY	2001-08-01	BCOR	11428	44533	999	2035	7.2767e-144	7.87637e-139
K562	ENCFF836VRV	ENCFF002CVP	2001-08-01	BDP1	11428	570	13	26	0.00203571	1
K562	ENCFF836VRV	ENCFF179NDS	2001-08-01	BHLHE40	11428	27327	1579	1249	3.51222e-20	3.80166e-15
K562	ENCFF836VRV	ENCFF048OIZ	2001-08-01	BMI1	11428	2818	177	128	6.95096e-06	0.752379
K562	ENCFF836VRV	ENCFF549GMO	2001-08-01	BRCA1	11428	951	2	43	1.95544e-16	2.11659e-11
K562	ENCFF836VRV	ENCFF714XHL	2001-08-01	BRD4	11428	8192	849	374	1.41793e-98	1.53478e-93
K562	ENCFF836VRV	ENCFF666LZV	2001-08-01	BRD9	11428	18855	599	861	6.53436e-22	7.07286e-17
K562	ENCFF836VRV	ENCFF002CVR	2001-08-01	BRF1	11428	221	10	10	0.12511	1
K562	ENCFF836VRV	ENCFF002CVS	2001-08-01	BRF2	11428	1087	10	49	1.15284e-11	1.24784e-06
K562	ENCFF836VRV	ENCFF996ZGL	2001-08-01	C11orf30	11428	61206	1068	2797	5.5576e-307	6.01561e-302
K562	ENCFF836VRV	ENCFF642BNC	2001-08-01	CBFA2T2	11428	32296	436	1476	3.3141e-223	3.58721e-218
K562	ENCFF836VRV	ENCFF993GXU	2001-08-01	CBFA2T3	11428	53515	712	2446	0	0
K562	ENCFF836VRV	ENCFF484DKT	2001-08-01	CBX1	11428	14582	1823	666	1.69292e-297	1.83243e-292
K562	ENCFF836VRV	ENCFF455TDM	2001-08-01	CBX3	11428	26746	1257	1222	0.00684829	1
K562	ENCFF836VRV	ENCFF062ARS	2001-08-01	CBX5	11428	7083	391	323	2.47644e-05	1
K562	ENCFF836VRV	ENCFF456PQY	2001-08-01	CBX8	11428	4702	0	214	1.15075e-93	1.24558e-88
K562	ENCFF836VRV	ENCFF874QUM	2001-08-01	CC2D1A	11428	26447	574	1208	2.34252e-92	2.53557e-87
K562	ENCFF836VRV	ENCFF583GKE	2001-08-01	CCAR2	11428	543	27	24	0.0639224	1
K562	ENCFF836VRV	ENCFF002CVU	2001-08-01	CCNT2	11428	20057	2693	916	0	0
K562	ENCFF836VRV	ENCFF643TEZ	2001-08-01	CDC5L	11428	5690	272	260	0.0184092	1
K562	ENCFF836VRV	ENCFF813LOW_ENCFF429XKT	2001-08-01	CEBPB	11428	19338	227	883	2.7591e-153	2.98648e-148
K562	ENCFF836VRV	ENCFF925MHB	2001-08-01	CEBPZ	11428	1303	133	59	5.34015e-17	5.78023e-12
K562	ENCFF836VRV	ENCFF859FVX	2001-08-01	CHAMP1	11428	14318	268	654	3.83486e-66	4.15089e-61
K562	ENCFF836VRV	ENCFF684MLP	2001-08-01	COPS2	11428	123	1	5	0.0336897	1
K562	ENCFF836VRV	ENCFF665FHC	2001-08-01	CREB3	11428	14139	403	646	2.24068e-25	2.42533e-20
K562	ENCFF836VRV	ENCFF582YPB	2001-08-01	CREB3L1	11428	22194	2076	1014	1.36093e-187	1.47309e-182
K562	ENCFF836VRV	ENCFF948TXN	2001-08-01	CREM	11428	38796	2236	1773	4.99221e-27	5.40362e-22
K562	ENCFF836VRV	ENCFF117EWO	2001-08-01	CSDE1	11428	5866	424	268	3.65688e-19	3.95824e-14
K562	ENCFF836VRV	ENCFF152VMJ	2001-08-01	CTBP1	11428	48724	2854	2227	5.05456e-38	5.4711e-33
K562	ENCFF836VRV	ENCFF002DDJ_ENCFF002DBD	2001-08-01	CTCF	11428	40743	926	1862	3.44618e-128	3.73017e-123
K562	ENCFF836VRV	ENCFF962FQM	2001-08-01	CTCFL	11428	12832	1032	586	1.38761e-62	1.50196e-57
K562	ENCFF836VRV	ENCFF517YCC	2001-08-01	CUX1	11428	6367	105	291	1.97281e-36	2.13539e-31
K562	ENCFF836VRV	ENCFF526HLP	2001-08-01	DACH1	11428	19460	617	889	8.79124e-23	9.51572e-18
K562	ENCFF836VRV	ENCFF338HQY	2001-08-01	DDX20	11428	10079	446	460	0.0152295	1
K562	ENCFF836VRV	ENCFF786WZD	2001-08-01	DEAF1	11428	3565	282	162	4.01773e-18	4.34883e-13
K562	ENCFF836VRV	ENCFF408SNO	2001-08-01	DIDO1	11428	7905	614	361	2.86624e-34	3.10245e-29
K562	ENCFF836VRV	ENCFF034PQD	2001-08-01	DNMT1	11428	3604	187	164	0.00623718	1
K562	ENCFF836VRV	ENCFF774QKS_ENCFF823SYE	2001-08-01	DPF2	11428	20210	282	923	1.62004e-135	1.75355e-130
K562	ENCFF836VRV	ENCFF106DAY	2001-08-01	E2F1	11428	23520	862	1075	1.97344e-12	2.13607e-07
K562	ENCFF836VRV	ENCFF225TLP	2001-08-01	E2F4	11428	10400	1539	475	0	0
K562	ENCFF836VRV	ENCFF356ASJ	2001-08-01	E2F5	11428	19472	928	890	0.00588426	1
K562	ENCFF836VRV	ENCFF417DTI_ENCFF917COW	2001-08-01	E2F6	11428	14596	1688	667	5.26737e-240	5.70145e-235
K562	ENCFF836VRV	ENCFF310AGG	2001-08-01	E2F7	11428	3169	328	144	9.75718e-40	1.05613e-34
K562	ENCFF836VRV	ENCFF925DJG	2001-08-01	E2F8	11428	12738	1308	582	2.17124e-147	2.35017e-142
K562	ENCFF836VRV	ENCFF083YCQ	2001-08-01	E4F1	11428	28697	1250	1311	0.00266877	1
K562	ENCFF836VRV	ENCFF806BDC	2001-08-01	EHMT2	11428	19437	154	888	8.16903e-204	8.84224e-199
K562	ENCFF836VRV	ENCFF502KHR	2001-08-01	ELF4	11428	21065	1102	962	7.17507e-07	0.0776637
K562	ENCFF836VRV	ENCFF019PEL	2001-08-01	ELK1	11428	3967	624	181	1.55583e-145	1.68405e-140
K562	ENCFF836VRV	ENCFF549TYR	2001-08-01	EP300	11428	28288	807	1293	1.96507e-48	2.12701e-43
K562	ENCFF836VRV	ENCFF925ANU	2001-08-01	EP400	11428	33534	2299	1532	5.699e-75	6.16866e-70
K562	ENCFF836VRV	ENCFF213EPU	2001-08-01	ESRRA	11428	33450	2062	1529	4.0525e-39	4.38647e-34
K562	ENCFF836VRV	ENCFF076YZO	2001-08-01	ETS1	11428	11558	1803	528	0	0
K562	ENCFF836VRV	ENCFF772HOY	2001-08-01	ETS2	11428	1762	178	80	1.62785e-21	1.762e-16
K562	ENCFF836VRV	ENCFF404YMX	2001-08-01	ETV1	11428	24198	1202	1106	0.000200304	1
K562	ENCFF836VRV	ENCFF545VNY	2001-08-01	ETV6	11428	6732	446	307	2.01124e-14	2.17698e-09
K562	ENCFF836VRV	ENCFF820EVZ	2001-08-01	EWSR1	11428	1795	108	82	0.000907089	1
K562	ENCFF836VRV	ENCFF883WYX	2001-08-01	FIP1L1	11428	10793	3169	493	0	0
K562	ENCFF836VRV	ENCFF002CVW	2001-08-01	FOS	11428	7646	358	349	0.0187887	1
K562	ENCFF836VRV	ENCFF473GCH	2001-08-01	FOSL1	11428	7973	196	364	1.53747e-22	1.66417e-17
K562	ENCFF836VRV	ENCFF809YFY	2001-08-01	FOXA1	11428	1350	9	61	1.03811e-16	1.12366e-11
K562	ENCFF836VRV	ENCFF452SPE	2001-08-01	FOXJ2	11428	15441	596	705	2.23394e-06	0.241803
K562	ENCFF836VRV	ENCFF699ZII	2001-08-01	FOXM1	11428	18535	404	847	6.19442e-65	6.7049e-60
K562	ENCFF836VRV	ENCFF142CPK	2001-08-01	FUS	11428	2947	1009	134	0	0
K562	ENCFF836VRV	ENCFF833FCO	2001-08-01	GABPA	11428	15847	1497	724	2.78297e-139	3.01231e-134
K562	ENCFF836VRV	ENCFF517KRT	2001-08-01	GABPB1	11428	30655	2048	1401	1.71916e-59	1.86083e-54
K562	ENCFF836VRV	ENCFF632NQI	2001-08-01	GATA1	11428	14605	184	667	4.13755e-109	4.47853e-104
K562	ENCFF836VRV	ENCFF732HOE	2001-08-01	GATA2	11428	11622	146	531	1.52543e-87	1.65114e-82
K562	ENCFF836VRV	ENCFF253FZN	2001-08-01	GATAD2A	11428	15131	1088	691	9.93915e-45	1.07582e-39
K562	ENCFF836VRV	ENCFF549KOD	2001-08-01	GATAD2B	11428	13320	874	608	8.00168e-25	8.6611e-20
K562	ENCFF836VRV	ENCFF126BCK	2001-08-01	GMEB1	11428	27813	2295	1271	4.52707e-147	4.90015e-142
K562	ENCFF836VRV	ENCFF167HYX	2001-08-01	GTF2A2	11428	6423	443	293	7.71443e-17	8.35018e-12
K562	ENCFF836VRV	ENCFF002CWR	2001-08-01	GTF2B	11428	2928	330	133	4.56035e-47	4.93616e-42
K562	ENCFF836VRV	ENCFF778RMG	2001-08-01	GTF2E2	11428	16371	1208	748	2.35278e-54	2.54668e-49
K562	ENCFF836VRV	ENCFF002CYL	2001-08-01	GTF3C2	11428	1858	63	84	0.00282893	1
K562	ENCFF836VRV	ENCFF474NLG	2001-08-01	HCFC1	11428	13559	1561	619	1.08833e-220	1.17801e-215
K562	ENCFF836VRV	ENCFF580DYE	2001-08-01	HDAC3	11428	10781	221	492	3.5346e-43	3.82589e-38
K562	ENCFF836VRV	ENCFF998HOR	2001-08-01	HDAC6	11428	1761	309	80	2.93012e-84	3.17159e-79
K562	ENCFF836VRV	ENCFF939ZFS	2001-08-01	HDAC8	11428	9908	843	452	5.70362e-61	6.17366e-56
K562	ENCFF836VRV	ENCFF676NPW	2001-08-01	HES1	11428	11091	372	506	6.63895e-11	7.18607e-06
K562	ENCFF836VRV	ENCFF265LKN	2001-08-01	HINFP	11428	8293	265	379	1.14502e-10	1.23938e-05
K562	ENCFF836VRV	ENCFF396NSO	2001-08-01	HLTF	11428	12623	759	577	6.78065e-14	7.33945e-09
K562	ENCFF836VRV	ENCFF558DSF	2001-08-01	HMBOX1	11428	28923	219	1322	0	0
K562	ENCFF836VRV	ENCFF002CWT	2001-08-01	HMGN3	11428	14587	2623	666	0	0
K562	ENCFF836VRV	ENCFF292JRY	2001-08-01	HNRNPH1	11428	315	104	14	1.27174e-53	1.37654e-48
K562	ENCFF836VRV	ENCFF777CWV	2001-08-01	HNRNPK	11428	11589	1239	529	2.81615e-152	3.04823e-147
K562	ENCFF836VRV	ENCFF010STZ	2001-08-01	HNRNPL	11428	8012	1765	366	0	0
K562	ENCFF836VRV	ENCFF122QSN	2001-08-01	HNRNPLL	11428	15382	1879	703	2.59941e-294	2.81362e-289
K562	ENCFF836VRV	ENCFF768TJI	2001-08-01	HNRNPUL1	11428	1122	131	51	4.11822e-21	4.45761e-16
K562	ENCFF836VRV	ENCFF835YLR	2001-08-01	ID3	11428	24733	1735	1130	4.32418e-63	4.68054e-58
K562	ENCFF836VRV	ENCFF415YPX	2001-08-01	ILF3	11428	4762	598	217	2.59603e-100	2.80997e-95
K562	ENCFF836VRV	ENCFF176NOI	2001-08-01	ILK	11428	2284	14	104	1.35342e-28	1.46495e-23
K562	ENCFF836VRV	ENCFF388AJH	2001-08-01	IRF1	11428	17589	269	804	8.88925e-107	9.62182e-102
K562	ENCFF836VRV	ENCFF284VUQ	2001-08-01	IRF1_0	11428	14592	1467	667	1.96281e-157	2.12456e-152
K562	ENCFF836VRV	ENCFF909LKK	2001-08-01	IRF1_1	11428	12543	935	573	3.13172e-44	3.38981e-39
K562	ENCFF836VRV	ENCFF908UIY	2001-08-01	IRF1_2	11428	13478	1102	616	6.03576e-70	6.53317e-65
K562	ENCFF836VRV	ENCFF730RUF	2001-08-01	IRF1_3	11428	1479	18	67	9.23156e-13	9.99233e-08
K562	ENCFF836VRV	ENCFF384YDT	2001-08-01	IRF2	11428	8509	636	388	2.52585e-31	2.73401e-26
K562	ENCFF836VRV	ENCFF196DHR	2001-08-01	IRF9	11428	9536	148	435	1.48148e-57	1.60356e-52
K562	ENCFF836VRV	ENCFF629BFI	2001-08-01	JUN	11428	21668	1098	990	4.07807e-05	1
K562	ENCFF836VRV	ENCFF417QAJ	2001-08-01	JUN_0	11428	8729	101	399	2.75702e-71	2.98422e-66
K562	ENCFF836VRV	ENCFF573GQX	2001-08-01	JUN_1	11428	4909	73	224	4.32337e-32	4.67966e-27
K562	ENCFF836VRV	ENCFF192BTP	2001-08-01	JUN_2	11428	6180	33	282	2.80861e-79	3.04006e-74
K562	ENCFF836VRV	ENCFF077UYM	2001-08-01	JUN_3	11428	9310	423	425	0.0193022	1
K562	ENCFF836VRV	ENCFF426DUB	2001-08-01	JUNB	11428	5347	258	244	0.0167407	1
K562	ENCFF836VRV	ENCFF337DKJ	2001-08-01	JUND	11428	47775	1646	2183	4.12557e-34	4.46556e-29
K562	ENCFF836VRV	ENCFF772QPO	2001-08-01	KAT8	11428	2268	112	103	0.0257027	1
K562	ENCFF836VRV	ENCFF838COI_ENCFF738WCE	2001-08-01	KDM1A	11428	26253	176	1200	3.06245e-300	3.31482e-295
K562	ENCFF836VRV	ENCFF042RAK	2001-08-01	KDM4B	11428	8167	1297	373	2.2684e-303	2.45534e-298
K562	ENCFF836VRV	ENCFF368TYM	2001-08-01	KDM5B	11428	22700	2767	1037	0	0
K562	ENCFF836VRV	ENCFF962VSZ	2001-08-01	KHSRP	11428	5187	256	237	0.0118683	1
K562	ENCFF836VRV	ENCFF717TWA	2001-08-01	KLF1	11428	11788	1352	538	3.07789e-190	3.33154e-185
K562	ENCFF836VRV	ENCFF802XZN	2001-08-01	KLF13	11428	11910	1424	544	1.2528e-215	1.35604e-210
K562	ENCFF836VRV	ENCFF844HBQ	2001-08-01	KLF16	11428	17908	560	818	2.16436e-22	2.34273e-17
K562	ENCFF836VRV	ENCFF314ULQ	2001-08-01	L3MBTL2	11428	53984	2813	2467	6.30324e-13	6.82269e-08
K562	ENCFF836VRV	ENCFF511OXK	2001-08-01	LARP7	11428	9680	482	442	0.00313294	1
K562	ENCFF836VRV	ENCFF659WAF	2001-08-01	LEF1	11428	21936	624	1002	2.43344e-38	2.63398e-33
K562	ENCFF836VRV	ENCFF308IXJ	2001-08-01	MAFF	11428	27637	137	1263	0	0
K562	ENCFF836VRV	ENCFF927JBT	2001-08-01	MAFG	11428	46186	117	2111	0	0
K562	ENCFF836VRV	ENCFF812QPN	2001-08-01	MAFK	11428	26965	330	1232	2.51104e-205	2.71798e-200
K562	ENCFF836VRV	ENCFF799HIG_ENCFF422NGZ	2001-08-01	MAX	11428	28672	2239	1310	1.53023e-120	1.65633e-115
K562	ENCFF836VRV	ENCFF470MLY	2001-08-01	MBD2	11428	15555	1672	711	2.63749e-206	2.85485e-201
K562	ENCFF836VRV	ENCFF226CZE	2001-08-01	MCM2	11428	4703	57	214	1.93563e-37	2.09515e-32
K562	ENCFF836VRV	ENCFF679ITJ	2001-08-01	MCM3	11428	2788	4	127	7.57887e-49	8.20344e-44
K562	ENCFF836VRV	ENCFF920RYJ	2001-08-01	MCM5	11428	1736	5	79	1.25803e-27	1.3617e-22
K562	ENCFF836VRV	ENCFF577UJR	2001-08-01	MEF2A	11428	1348	24	61	3.65803e-08	0.00395949
K562	ENCFF836VRV	ENCFF257RYT	2001-08-01	MEF2D	11428	14762	275	674	1.4541e-68	1.57393e-63
K562	ENCFF836VRV	ENCFF613RNG	2001-08-01	MEIS2	11428	53002	1154	2422	8.62632e-182	9.33721e-177
K562	ENCFF836VRV	ENCFF670ZCR	2001-08-01	MGA	11428	33894	1521	1549	0.00792954	1
K562	ENCFF836VRV	ENCFF365NKO	2001-08-01	MIER1	11428	9498	317	434	6.11322e-10	6.61701e-05
K562	ENCFF836VRV	ENCFF497XOD	2001-08-01	MITF	11428	34801	455	1590	3.87341e-248	4.19262e-243
K562	ENCFF836VRV	ENCFF973OME_ENCFF059ONJ	2001-08-01	MNT	11428	17605	1787	804	1.07718e-195	1.16595e-190
K562	ENCFF836VRV	ENCFF769GYG	2001-08-01	MTA1	11428	17990	728	822	5.51001e-05	1
K562	ENCFF836VRV	ENCFF350YXB	2001-08-01	MTA3	11428	28818	2633	1317	1.75567e-223	1.90035e-218
K562	ENCFF836VRV	ENCFF970LCB	2001-08-01	MXI1	11428	9033	1102	412	7.5092e-174	8.12804e-169
K562	ENCFF836VRV	ENCFF877ANE	2001-08-01	MYBL2	11428	4580	94	209	1.94907e-19	2.1097e-14
K562	ENCFF836VRV	ENCFF465JKF	2001-08-01	MYC	11428	31436	2385	1437	7.04559e-116	7.62621e-111
K562	ENCFF836VRV	ENCFF099SDW	2001-08-01	MYC_0	11428	21468	1735	981	6.31554e-105	6.836e-100
K562	ENCFF836VRV	ENCFF634AYU	2001-08-01	MYC_1	11428	8915	905	407	2.07574e-100	2.24681e-95
K562	ENCFF836VRV	ENCFF676YJE	2001-08-01	MYC_2	11428	37659	2488	1721	5.67424e-68	6.14186e-63
K562	ENCFF836VRV	ENCFF387LTN	2001-08-01	MYC_3	11428	12479	1223	570	1.45833e-124	1.57851e-119
K562	ENCFF836VRV	ENCFF583DZD	2001-08-01	MYNN	11428	15422	1235	704	1.61793e-73	1.75126e-68
K562	ENCFF836VRV	ENCFF074EZL	2001-08-01	NBN	11428	20957	1056	957	8.67174e-05	1
K562	ENCFF836VRV	ENCFF495CSO	2001-08-01	NCOA4	11428	3079	65	140	6.03621e-13	6.53366e-08
K562	ENCFF836VRV	ENCFF322DSX	2001-08-01	NCOA6	11428	4645	416	212	1.25963e-35	1.36344e-30
K562	ENCFF836VRV	ENCFF165BCW_ENCFF366UBB	2001-08-01	NCOR1	11428	17482	387	799	1.65613e-59	1.79261e-54
K562	ENCFF836VRV	ENCFF002CXG	2001-08-01	NELFE	11428	458	124	20	2.91048e-55	3.15033e-50
K562	ENCFF836VRV	ENCFF581YKY	2001-08-01	NEUROD1	11428	14353	1307	656	3.08729e-111	3.34171e-106
K562	ENCFF836VRV	ENCFF495MHZ	2001-08-01	NFE2	11428	30144	554	1377	7.4084e-141	8.01893e-136
K562	ENCFF836VRV	ENCFF175IUO	2001-08-01	NFE2L1	11428	7430	24	339	5.08461e-111	5.50363e-106
K562	ENCFF836VRV	ENCFF370ENX	2001-08-01	NFIC	11428	48576	1449	2220	4.53602e-69	4.90983e-64
K562	ENCFF836VRV	ENCFF157UUF	2001-08-01	NFRKB	11428	22856	1109	1044	0.00164938	1
K562	ENCFF836VRV	ENCFF986MHU	2001-08-01	NFXL1	11428	6160	94	281	1.27429e-38	1.37931e-33
K562	ENCFF836VRV	ENCFF012VES	2001-08-01	NFYA	11428	4382	340	200	6.07657e-20	6.57734e-15
K562	ENCFF836VRV	ENCFF113PMT	2001-08-01	NFYB	11428	8952	433	409	0.0096069	1
K562	ENCFF836VRV	ENCFF906PGD	2001-08-01	NKRF	11428	18069	1668	825	1.32501e-146	1.43421e-141
K562	ENCFF836VRV	ENCFF776YPS	2001-08-01	NONO	11428	12558	1649	574	1.28143e-291	1.38703e-286
K562	ENCFF836VRV	ENCFF954NAJ	2001-08-01	NR0B1	11428	405	5	18	0.000239817	1
K562	ENCFF836VRV	ENCFF664ZGR	2001-08-01	NR2C1	11428	15500	653	708	0.00174025	1
K562	ENCFF836VRV	ENCFF594LCH	2001-08-01	NR2C2	11428	634	78	28	4.61392e-15	4.99416e-10
K562	ENCFF836VRV	ENCFF175IIE	2001-08-01	NR2F1	11428	37884	955	1731	5.87263e-93	6.35659e-88
K562	ENCFF836VRV	ENCFF255EOB	2001-08-01	NR2F2	11428	21050	764	962	4.27994e-12	4.63265e-07
K562	ENCFF836VRV	ENCFF712AXK	2001-08-01	NR2F6	11428	23333	334	1066	5.95599e-152	6.44683e-147
K562	ENCFF836VRV	ENCFF859NPS	2001-08-01	NR4A1	11428	20688	1129	945	5.69859e-10	6.16821e-05
K562	ENCFF836VRV	ENCFF144PPR_ENCFF493ABN	2001-08-01	NRF1	11428	17306	1665	791	2.35883e-161	2.55323e-156
K562	ENCFF836VRV	ENCFF289BUU	2001-08-01	NUFIP1	11428	3572	241	163	2.26896e-09	0.000245594
K562	ENCFF836VRV	ENCFF168HAG	2001-08-01	PBX2	11428	36719	260	1678	0	0
K562	ENCFF836VRV	ENCFF941RVL	2001-08-01	PCBP1	11428	10920	2247	499	0	0
K562	ENCFF836VRV	ENCFF881XQF	2001-08-01	PCBP2	11428	2539	173	116	1.6059e-07	0.0173825
K562	ENCFF836VRV	ENCFF462FRU	2001-08-01	PHB2	11428	7367	103	336	1.96896e-50	2.13122e-45
K562	ENCFF836VRV	ENCFF948YVM	2001-08-01	PHF20	11428	15696	1765	717	4.02746e-238	4.35936e-233
K562	ENCFF836VRV	ENCFF134CUM	2001-08-01	PHF21A	11428	8976	752	410	3.88249e-52	4.20244e-47
K562	ENCFF836VRV	ENCFF626KTJ	2001-08-01	PHF8	11428	29046	3407	1327	0	0
K562	ENCFF836VRV	ENCFF544XKC	2001-08-01	PKNOX1	11428	52588	1069	2403	6.11171e-206	6.61537e-201
K562	ENCFF836VRV	ENCFF881QBT	2001-08-01	PML	11428	21322	1817	974	1.10964e-128	1.20109e-123
K562	ENCFF836VRV	ENCFF662YQK	2001-08-01	POLR2A_0	11428	19534	2420	892	0	0
K562	ENCFF836VRV	ENCFF853ZMA	2001-08-01	POLR2A_1	11428	22578	2724	1032	0	0
K562	ENCFF836VRV	ENCFF206YXX	2001-08-01	POLR2A_2	11428	19284	2199	881	6.00691e-304	6.50194e-299
K562	ENCFF836VRV	ENCFF270QAB	2001-08-01	POLR2A_3	11428	23423	2655	1070	0	0
K562	ENCFF836VRV	ENCFF296CNQ	2001-08-01	POLR2AphosphoS2	11428	10069	1328	460	3.48539e-237	3.77262e-232
K562	ENCFF836VRV	ENCFF542DOG	2001-08-01	POLR2AphosphoS5	11428	30324	2353	1386	1.04793e-123	1.13429e-118
K562	ENCFF836VRV	ENCFF872JJJ	2001-08-01	POLR2B	11428	20684	2245	945	7.44435e-282	8.05784e-277
K562	ENCFF836VRV	ENCFF273EYJ	2001-08-01	POLR2G	11428	58571	7866	2677	0	0
K562	ENCFF836VRV	ENCFF801YZV	2001-08-01	POLR2H	11428	23424	1459	1070	2.97627e-30	3.22154e-25
K562	ENCFF836VRV	ENCFF002CXW	2001-08-01	POLR3A	11428	1310	19	59	8.66401e-10	9.37802e-05
K562	ENCFF836VRV	ENCFF002CXT	2001-08-01	POLR3G	11428	207	2	9	0.0049981	1
K562	ENCFF836VRV	ENCFF990CFV	2001-08-01	POU5F1	11428	2219	357	101	5.54676e-87	6.00387e-82
K562	ENCFF836VRV	ENCFF294HEI	2001-08-01	PRDM10	11428	29758	1086	1360	1.57884e-15	1.70895e-10
K562	ENCFF836VRV	ENCFF785ACI	2001-08-01	PRPF4	11428	6788	1822	310	0	0
K562	ENCFF836VRV	ENCFF694BIA	2001-08-01	PTBP1	11428	5027	657	229	2.19571e-117	2.37666e-112
K562	ENCFF836VRV	ENCFF007DKB	2001-08-01	PTRF	11428	5154	20	235	9.46301e-74	1.02429e-68
K562	ENCFF836VRV	ENCFF332DRG	2001-08-01	PTTG1	11428	5547	15	253	1.13189e-86	1.22517e-81
K562	ENCFF836VRV	ENCFF421KIV	2001-08-01	PYGO2	11428	4223	110	193	2.46349e-11	2.66651e-06
K562	ENCFF836VRV	ENCFF002CXU	2001-08-01	RAD21	11428	17627	233	805	2.86513e-125	3.10124e-120
K562	ENCFF836VRV	ENCFF096XMD	2001-08-01	RAD51	11428	17974	626	821	1.73151e-13	1.8742e-08
K562	ENCFF836VRV	ENCFF975IRM	2001-08-01	RB1	11428	25768	2746	1177	0	0
K562	ENCFF836VRV	ENCFF379MPS	2001-08-01	RBBP5	11428	24338	2858	1112	0	0
K562	ENCFF836VRV	ENCFF120IDE	2001-08-01	RBFOX2	11428	56370	5957	2576	0	0
K562	ENCFF836VRV	ENCFF682SIY	2001-08-01	RBM14	11428	3099	956	141	0	0
K562	ENCFF836VRV	ENCFF971VJZ	2001-08-01	RBM15	11428	400	157	18	1.5531e-89	1.6811e-84
K562	ENCFF836VRV	ENCFF861YKK	2001-08-01	RBM17	11428	47	8	2	0.000859272	1
K562	ENCFF836VRV	ENCFF522JUV	2001-08-01	RBM22	11428	13050	3120	596	0	0
K562	ENCFF836VRV	ENCFF680WBN	2001-08-01	RBM25	11428	49721	771	2272	1.42303e-292	1.5403e-287
K562	ENCFF836VRV	ENCFF782GWS	2001-08-01	RBM34	11428	1085	320	49	1.80626e-145	1.95511e-140
K562	ENCFF836VRV	ENCFF209JJD	2001-08-01	RBM39	11428	2747	214	125	1.31201e-13	1.42014e-08
K562	ENCFF836VRV	ENCFF484CKD	2001-08-01	RCOR1	11428	6822	329	311	0.0131893	1
K562	ENCFF836VRV	ENCFF580QGA	2001-08-01	RELA	11428	10319	333	471	3.53975e-12	3.83147e-07
K562	ENCFF836VRV	ENCFF237UAN_ENCFF010UHD	2001-08-01	RFX1	11428	13929	286	636	4.34092e-55	4.69865e-50
K562	ENCFF836VRV	ENCFF716LRI	2001-08-01	RFX5	11428	2725	244	124	6.22556e-22	6.73861e-17
K562	ENCFF836VRV	ENCFF209HKW	2001-08-01	RLF	11428	10587	1199	483	3.67053e-165	3.97302e-160
K562	ENCFF836VRV	ENCFF478MPX	2001-08-01	SAFB	11428	5923	1249	270	0	0
K562	ENCFF836VRV	ENCFF624NUZ	2001-08-01	SAFB2	11428	82	16	3	1.02432e-07	0.0110874
K562	ENCFF836VRV	ENCFF718NUA	2001-08-01	SAP30	11428	14058	1901	642	0	0
K562	ENCFF836VRV	ENCFF294EHN	2001-08-01	SETDB1	11428	4113	440	188	1.70446e-55	1.84493e-50
K562	ENCFF836VRV	ENCFF757ODD	2001-08-01	SFPQ	11428	228	59	10	3.27365e-26	3.54343e-21
K562	ENCFF836VRV	ENCFF191MPD	2001-08-01	SIN3A	11428	13459	1841	615	0	0
K562	ENCFF836VRV	ENCFF280GTU	2001-08-01	SIN3B	11428	10501	1760	480	0	0
K562	ENCFF836VRV	ENCFF002CXZ	2001-08-01	SIRT6	11428	2305	29	105	1.16689e-18	1.26305e-13
K562	ENCFF836VRV	ENCFF033EBX_ENCFF002CMM	2001-08-01	SIX5	11428	3194	408	146	9.711e-71	1.05113e-65
K562	ENCFF836VRV	ENCFF481WGW	2001-08-01	SKIL	11428	24313	2232	1111	3.30376e-192	3.57602e-187
K562	ENCFF836VRV	ENCFF315YAF	2001-08-01	SMAD1	11428	8855	951	404	1.2299e-118	1.33126e-113
K562	ENCFF836VRV	ENCFF011KRN	2001-08-01	SMAD2	11428	200	31	9	5.72593e-09	0.00061978
K562	ENCFF836VRV	ENCFF178MOP	2001-08-01	SMAD5	11428	22325	2513	1020	0	0
K562	ENCFF836VRV	ENCFF995NIE	2001-08-01	SMARCA5	11428	19278	344	881	4.09258e-95	4.42985e-90
K562	ENCFF836VRV	ENCFF944GJH	2001-08-01	SMARCB1	11428	3079	96	140	1.70096e-05	1
K562	ENCFF836VRV	ENCFF114PTZ	2001-08-01	SMARCC2	11428	19106	311	873	4.87375e-107	5.2754e-102
K562	ENCFF836VRV	ENCFF622RBW	2001-08-01	SMARCE1	11428	36356	615	1661	2.01147e-191	2.17723e-186
K562	ENCFF836VRV	ENCFF041YQC	2001-08-01	SMC3	11428	26872	938	1228	8.15034e-19	8.82201e-14
K562	ENCFF836VRV	ENCFF494ZUY	2001-08-01	SNIP1	11428	3268	206	149	1.65314e-06	0.178938
K562	ENCFF836VRV	ENCFF033KXY	2001-08-01	SNRNP70	11428	882	144	40	3.80665e-37	4.12036e-32
K562	ENCFF836VRV	ENCFF241TBP	2001-08-01	SOX6	11428	37311	1636	1705	0.00239492	1
K562	ENCFF836VRV	ENCFF300XUA	2001-08-01	SP1	11428	14898	1789	681	5.66441e-272	6.13121e-267
K562	ENCFF836VRV	ENCFF002CMJ	2001-08-01	SPI1	11428	28677	589	1310	3.66736e-111	3.96959e-106
K562	ENCFF836VRV	ENCFF985TSH	2001-08-01	SREBF1	11428	2865	392	130	1.5381e-76	1.66486e-71
K562	ENCFF836VRV	ENCFF798URE	2001-08-01	SRSF1	11428	1170	461	53	2.43321e-258	2.63373e-253
K562	ENCFF836VRV	ENCFF722XRW	2001-08-01	SRSF3	11428	1984	396	90	2.44806e-124	2.64981e-119
K562	ENCFF836VRV	ENCFF059WVE	2001-08-01	SRSF7	11428	208	65	9	1.58775e-33	1.7186e-28
K562	ENCFF836VRV	ENCFF137IBM	2001-08-01	SRSF9	11428	29	2	1	0.18394	1
K562	ENCFF836VRV	ENCFF290HTJ	2001-08-01	STAT1_0	11428	1337	38	61	0.000428598	1
K562	ENCFF836VRV	ENCFF254MPF	2001-08-01	STAT1_1	11428	1283	39	58	0.00188376	1
K562	ENCFF836VRV	ENCFF498DOQ	2001-08-01	STAT1_2	11428	957	26	43	0.00154845	1
K562	ENCFF836VRV	ENCFF648NYF	2001-08-01	STAT1_3	11428	2831	239	129	1.5059e-18	1.63e-13
K562	ENCFF836VRV	ENCFF841YFF	2001-08-01	STAT2_0	11428	2097	47	95	1.91587e-08	0.00207376
K562	ENCFF836VRV	ENCFF714VIT	2001-08-01	STAT2_1	11428	3606	219	164	6.46042e-06	0.699282
K562	ENCFF836VRV	ENCFF696KPD	2001-08-01	STAT5A	11428	13378	384	611	1.51509e-23	1.63994e-18
K562	ENCFF836VRV	ENCFF484HCG	2001-08-01	SUPT5H	11428	29659	3122	1355	0	0
K562	ENCFF836VRV	ENCFF822FWM	2001-08-01	TAF1	11428	19025	2182	869	5.25069e-305	5.6834e-300
K562	ENCFF836VRV	ENCFF617CAZ	2001-08-01	TAF15	11428	787	248	35	1.03067e-120	1.11561e-115
K562	ENCFF836VRV	ENCFF034CQR	2001-08-01	TAF7	11428	648	92	29	7.10086e-21	7.68604e-16
K562	ENCFF836VRV	ENCFF785HXY	2001-08-01	TAF9B	11428	15392	1089	703	5.38296e-42	5.82656e-37
K562	ENCFF836VRV	ENCFF284LRP_ENCFF482CEV	2001-08-01	TAL1	11428	19046	87	870	3.78578e-255	4.09776e-250
K562	ENCFF836VRV	ENCFF626MVT	2001-08-01	TBL1XR1	11428	15770	802	720	0.000156223	1
K562	ENCFF836VRV	ENCFF380FJL	2001-08-01	TBP	11428	21570	1893	986	4.26873e-145	4.62051e-140
K562	ENCFF836VRV	ENCFF249EZR	2001-08-01	TCF7	11428	5844	655	267	2.66574e-89	2.88542e-84
K562	ENCFF836VRV	ENCFF312RFN	2001-08-01	TCF7L2	11428	2119	196	96	1.33973e-19	1.45014e-14
K562	ENCFF836VRV	ENCFF619BDC	2001-08-01	TEAD2	11428	6623	97	302	2.63389e-43	2.85095e-38
K562	ENCFF836VRV	ENCFF209MQX	2001-08-01	TEAD4	11428	35771	962	1635	2.62278e-73	2.83892e-68
K562	ENCFF836VRV	ENCFF701MXF	2001-08-01	TFDP1	11428	22661	1534	1035	3.83103e-48	4.14674e-43
K562	ENCFF836VRV	ENCFF641LJY	2001-08-01	THAP1	11428	5972	1039	272	2.8182e-274	3.05045e-269
K562	ENCFF836VRV	ENCFF671BFH	2001-08-01	THRA	11428	1757	12	80	2.58931e-21	2.8027e-16
K562	ENCFF836VRV	ENCFF294VWT	2001-08-01	THRAP3	11428	4904	140	224	4.20386e-10	4.5503e-05
K562	ENCFF836VRV	ENCFF262BVP	2001-08-01	TOE1	11428	19775	1130	903	4.05231e-14	4.38626e-09
K562	ENCFF836VRV	ENCFF049CRW_ENCFF646VQW	2001-08-01	TRIM24	11428	15621	168	714	8.56235e-134	9.26798e-129
K562	ENCFF836VRV	ENCFF561IZB	2001-08-01	TRIP13	11428	2520	24	115	5.25021e-25	5.68289e-20
K562	ENCFF836VRV	ENCFF036YVI	2001-08-01	TSC22D4	11428	3352	10	153	6.91983e-52	7.4901e-47
K562	ENCFF836VRV	ENCFF730URE	2001-08-01	U2AF1	11428	4352	1225	198	0	0
K562	ENCFF836VRV	ENCFF398EQF	2001-08-01	U2AF2	11428	137	3	6	0.0892351	1
K562	ENCFF836VRV	ENCFF671DOL	2001-08-01	UBTF	11428	19212	1921	878	5.31091e-203	5.74859e-198
K562	ENCFF836VRV	ENCFF334FMW	2001-08-01	USF1	11428	21340	880	975	0.000112192	1
K562	ENCFF836VRV	ENCFF150VTD	2001-08-01	USF2	11428	3664	214	167	6.31178e-05	1
K562	ENCFF836VRV	ENCFF186QUP	2001-08-01	VEZF1	11428	46383	2539	2120	9.91073e-20	1.07275e-14
K562	ENCFF836VRV	ENCFF803LEC	2001-08-01	XRCC3	11428	1986	21	90	1.75487e-18	1.89949e-13
K562	ENCFF836VRV	ENCFF998KKJ	2001-08-01	XRCC5	11428	13253	1240	605	2.31708e-113	2.50803e-108
K562	ENCFF836VRV	ENCFF706LIT	2001-08-01	YBX1	11428	1358	2	62	2.27769e-24	2.4654e-19
K562	ENCFF836VRV	ENCFF246HIU	2001-08-01	YBX3	11428	2680	106	122	0.0129099	1
K562	ENCFF836VRV	ENCFF926FUM_ENCFF328XKC	2001-08-01	YY1	11428	12127	1591	554	2.69284e-281	2.91475e-276
K562	ENCFF836VRV	ENCFF253FON	2001-08-01	ZBED1	11428	5913	866	270	4.38678e-182	4.74829e-177
K562	ENCFF836VRV	ENCFF434QZL	2001-08-01	ZBTB11	11428	7250	759	331	3.05295e-90	3.30454e-85
K562	ENCFF836VRV	ENCFF561USY	2001-08-01	ZBTB2	11428	18423	1152	842	7.37421e-25	7.98191e-20
K562	ENCFF836VRV	ENCFF408FQC	2001-08-01	ZBTB33	11428	60931	1047	2785	0	0
K562	ENCFF836VRV	ENCFF417LEJ	2001-08-01	ZBTB40	11428	29759	1369	1360	0.0104659	1
K562	ENCFF836VRV	ENCFF706ISJ	2001-08-01	ZBTB7A	11428	30583	2698	1398	1.24561e-208	1.34826e-203
K562	ENCFF836VRV	ENCFF589EVD	2001-08-01	ZBTB8A	11428	955	16	43	1.38106e-06	0.149487
K562	ENCFF836VRV	ENCFF522JRK	2001-08-01	ZC3H11A	11428	2624	300	119	3.14226e-44	3.40121e-39
K562	ENCFF836VRV	ENCFF809OEX	2001-08-01	ZC3H8	11428	12691	704	580	6.19075e-08	0.00670093
K562	ENCFF836VRV	ENCFF521CRG	2001-08-01	ZFP36	11428	23635	511	1080	1.62005e-83	1.75356e-78
K562	ENCFF836VRV	ENCFF396DNK	2001-08-01	ZFP91	11428	14258	740	651	4.33424e-05	1
K562	ENCFF836VRV	ENCFF433RKB	2001-08-01	ZFX	11428	27044	2700	1236	2.88432e-283	3.12202e-278
K562	ENCFF836VRV	ENCFF195ODE	2001-08-01	ZHX1	11428	3453	445	157	1.02e-78	1.10406e-73
K562	ENCFF836VRV	ENCFF163VUK	2001-08-01	ZKSCAN1	11428	14153	987	646	3.21069e-36	3.47529e-31
K562	ENCFF836VRV	ENCFF529FWJ	2001-08-01	ZKSCAN8	11428	11311	144	517	2.93816e-84	3.18029e-79
K562	ENCFF836VRV	ENCFF597DIY	2001-08-01	ZMIZ1	11428	1049	99	47	1.43167e-11	1.54966e-06
K562	ENCFF836VRV	ENCFF511QHY	2001-08-01	ZMYM3	11428	39230	145	1793	0	0
K562	ENCFF836VRV	ENCFF114IWY	2001-08-01	ZNF143	11428	29873	1155	1365	4.6107e-10	4.99067e-05
K562	ENCFF836VRV	ENCFF116DIO	2001-08-01	ZNF148	11428	22956	1073	1049	0.00927345	1
K562	ENCFF836VRV	ENCFF721LDD	2001-08-01	ZNF175	11428	18917	562	864	1.09133e-28	1.18127e-23
K562	ENCFF836VRV	ENCFF853TZC	2001-08-01	ZNF197	11428	10450	465	477	0.0158853	1
K562	ENCFF836VRV	ENCFF891MVM	2001-08-01	ZNF263	11428	3994	310	182	1.75716e-18	1.90197e-13
K562	ENCFF836VRV	ENCFF344QKL	2001-08-01	ZNF274	11428	3064	184	140	5.47445e-05	1
K562	ENCFF836VRV	ENCFF386WKY	2001-08-01	ZNF280A	11428	6438	4	294	6.46547e-120	6.99829e-115
K562	ENCFF836VRV	ENCFF581ZZT	2001-08-01	ZNF282	11428	12961	1557	592	1.62347e-237	1.75726e-232
K562	ENCFF836VRV	ENCFF921WMN	2001-08-01	ZNF318	11428	10963	199	501	1.23116e-53	1.33262e-48
K562	ENCFF836VRV	ENCFF744SVC	2001-08-01	ZNF354B	11428	4779	89	218	1.69331e-23	1.83286e-18
K562	ENCFF836VRV	ENCFF706SJZ	2001-08-01	ZNF384	11428	19825	588	906	3.22127e-30	3.48673e-25
K562	ENCFF836VRV	ENCFF388YOB	2001-08-01	ZNF395	11428	25387	1291	1160	8.86097e-06	0.95912
K562	ENCFF836VRV	ENCFF834WGJ	2001-08-01	ZNF507	11428	11748	22	537	6.20199e-195	6.71309e-190
K562	ENCFF836VRV	ENCFF447QUG	2001-08-01	ZNF512	11428	23246	25	1062	0	0
K562	ENCFF836VRV	ENCFF815TTY	2001-08-01	ZNF584	11428	15035	428	687	5.78606e-27	6.26289e-22
K562	ENCFF836VRV	ENCFF602AXP	2001-08-01	ZNF589	11428	21343	731	975	4.36335e-17	4.72293e-12
K562	ENCFF836VRV	ENCFF273TYA	2001-08-01	ZNF592	11428	35259	1230	1611	5.41949e-24	5.86611e-19
K562	ENCFF836VRV	ENCFF173NRW	2001-08-01	ZNF644	11428	12705	464	580	7.17231e-08	0.00776338
K562	ENCFF836VRV	ENCFF248AOD	2001-08-01	ZNF766	11428	26482	844	1210	1.67395e-29	1.8119e-24
K562	ENCFF836VRV	ENCFF654BMD	2001-08-01	ZNF83	11428	11272	496	515	0.0125596	1
K562	ENCFF836VRV	ENCFF996IVU	2001-08-01	ZNF830	11428	3460	129	158	0.00204874	1
K562	ENCFF836VRV	ENCFF253NXR	2001-08-01	ZSCAN29	11428	17315	558	791	3.9583e-19	4.2845e-14
K562	ENCFF836VRV	ENCFF588OLK	2001-08-01	ZZZ3	11428	3029	254	138	3.00632e-19	3.25407e-14
K562	ENCFF396GUH	ENCFF836VRV	ADNP	2001-08-01	21217	11428	104	969	5.41407e-277	5.86025e-272
K562	ENCFF396GUH	ENCFF396GUH	ADNP	ADNP	21217	21217	21217	1800	0	0
K562	ENCFF396GUH	ENCFF360BTO	ADNP	AFF1	21217	20613	2263	1749	8.57252e-33	9.27899e-28
K562	ENCFF396GUH	ENCFF010MMQ	ADNP	ARHGAP35	21217	5027	328	426	1.05131e-07	0.0113795
K562	ENCFF396GUH	ENCFF225MPC	ADNP	ARID1B	21217	50204	4278	4260	0.00587204	1
K562	ENCFF396GUH	ENCFF332ICQ	ADNP	ARID2	21217	11835	595	1004	6.04105e-45	6.53889e-40
K562	ENCFF396GUH	ENCFF835KAT	ADNP	ARID3A	21217	11550	1492	980	1.04471e-52	1.13081e-47
K562	ENCFF396GUH	ENCFF235ZZP	ADNP	ASH1L	21217	8152	539	691	2.36925e-10	2.5645e-05
K562	ENCFF396GUH	ENCFF002CVM	ADNP	ATF1	21217	14864	1373	1261	8.57426e-05	1
K562	ENCFF396GUH	ENCFF968KBN	ADNP	ATF2	21217	46506	1263	3946	0	0
K562	ENCFF396GUH	ENCFF958KNK	ADNP	ATF3	21217	59815	2804	5076	7.46468e-267	8.07985e-262
K562	ENCFF396GUH	ENCFF710IEF	ADNP	ATF4	21217	42275	1750	3587	4.40282e-255	4.76566e-250
K562	ENCFF396GUH	ENCFF868QLL	ADNP	ATF7	21217	47113	3412	3998	1.57995e-22	1.71015e-17
K562	ENCFF396GUH	ENCFF423EMU	ADNP	BACH1	21217	4708	353	399	0.0013438	1
K562	ENCFF396GUH	ENCFF057ZUY	ADNP	BCOR	21217	44533	9670	3779	0	0
K562	ENCFF396GUH	ENCFF002CVP	ADNP	BDP1	21217	570	216	48	2.00026e-70	2.1651e-65
K562	ENCFF396GUH	ENCFF179NDS	ADNP	BHLHE40	21217	27327	1713	2319	1.36576e-40	1.47831e-35
K562	ENCFF396GUH	ENCFF048OIZ	ADNP	BMI1	21217	2818	76	239	4.85774e-35	5.25806e-30
K562	ENCFF396GUH	ENCFF549GMO	ADNP	BRCA1	21217	951	1	80	1.44388e-33	1.56287e-28
K562	ENCFF396GUH	ENCFF714XHL	ADNP	BRD4	21217	8192	646	695	0.00267476	1
K562	ENCFF396GUH	ENCFF666LZV	ADNP	BRD9	21217	18855	2760	1600	1.33084e-152	1.44052e-147
K562	ENCFF396GUH	ENCFF002CVR	ADNP	BRF1	21217	221	129	18	2.60677e-64	2.82159e-59
K562	ENCFF396GUH	ENCFF002CVS	ADNP	BRF2	21217	1087	37	92	3.68401e-11	3.98761e-06
K562	ENCFF396GUH	ENCFF996ZGL	ADNP	C11orf30	21217	61206	1595	5194	0	0
K562	ENCFF396GUH	ENCFF642BNC	ADNP	CBFA2T2	21217	32296	2612	2740	0.000374334	1
K562	ENCFF396GUH	ENCFF993GXU	ADNP	CBFA2T3	21217	53515	3459	4541	6.05126e-64	6.54995e-59
K562	ENCFF396GUH	ENCFF484DKT	ADNP	CBX1	21217	14582	2688	1237	1.07489e-278	1.16347e-273
K562	ENCFF396GUH	ENCFF455TDM	ADNP	CBX3	21217	26746	3153	2269	1.72721e-69	1.86955e-64
K562	ENCFF396GUH	ENCFF062ARS	ADNP	CBX5	21217	7083	536	601	0.000448238	1
K562	ENCFF396GUH	ENCFF456PQY	ADNP	CBX8	21217	4702	6	399	2.91747e-161	3.1579e-156
K562	ENCFF396GUH	ENCFF874QUM	ADNP	CC2D1A	21217	26447	3178	2244	1.53611e-77	1.6627e-72
K562	ENCFF396GUH	ENCFF583GKE	ADNP	CCAR2	21217	543	48	46	0.0550707	1
K562	ENCFF396GUH	ENCFF002CVU	ADNP	CCNT2	21217	20057	1558	1702	1.91026e-05	1
K562	ENCFF396GUH	ENCFF643TEZ	ADNP	CDC5L	21217	5690	637	482	2.39096e-12	2.588e-07
K562	ENCFF396GUH	ENCFF813LOW_ENCFF429XKT	ADNP	CEBPB	21217	19338	1214	1641	3.27611e-29	3.5461e-24
K562	ENCFF396GUH	ENCFF925MHB	ADNP	CEBPZ	21217	1303	45	110	1.02912e-12	1.11393e-07
K562	ENCFF396GUH	ENCFF859FVX	ADNP	CHAMP1	21217	14318	2238	1215	3.19201e-152	3.45507e-147
K562	ENCFF396GUH	ENCFF684MLP	ADNP	COPS2	21217	123	1	10	0.000453999	1
K562	ENCFF396GUH	ENCFF665FHC	ADNP	CREB3	21217	14139	1196	1199	0.0114917	1
K562	ENCFF396GUH	ENCFF582YPB	ADNP	CREB3L1	21217	22194	1485	1883	2.01725e-22	2.18349e-17
K562	ENCFF396GUH	ENCFF948TXN	ADNP	CREM	21217	38796	2430	3292	8.92036e-57	9.65548e-52
K562	ENCFF396GUH	ENCFF117EWO	ADNP	CSDE1	21217	5866	502	497	0.017362	1
K562	ENCFF396GUH	ENCFF152VMJ	ADNP	CTBP1	21217	48724	2915	4135	4.3056e-90	4.66042e-85
K562	ENCFF396GUH	ENCFF002DDJ_ENCFF002DBD	ADNP	CTCF	21217	40743	829	3457	0	0
K562	ENCFF396GUH	ENCFF962FQM	ADNP	CTCFL	21217	12832	429	1089	1.62563e-115	1.7596e-110
K562	ENCFF396GUH	ENCFF517YCC	ADNP	CUX1	21217	6367	767	540	7.10039e-21	7.68553e-16
K562	ENCFF396GUH	ENCFF526HLP	ADNP	DACH1	21217	19460	1754	1651	0.000408953	1
K562	ENCFF396GUH	ENCFF338HQY	ADNP	DDX20	21217	10079	1173	855	1.20659e-25	1.30603e-20
K562	ENCFF396GUH	ENCFF786WZD	ADNP	DEAF1	21217	3565	349	302	0.000657027	1
K562	ENCFF396GUH	ENCFF408SNO	ADNP	DIDO1	21217	7905	611	670	0.00110913	1
K562	ENCFF396GUH	ENCFF034PQD	ADNP	DNMT1	21217	3604	388	305	6.22976e-07	0.0674315
K562	ENCFF396GUH	ENCFF774QKS_ENCFF823SYE	ADNP	DPF2	21217	20210	2958	1715	2.71728e-163	2.94121e-158
K562	ENCFF396GUH	ENCFF106DAY	ADNP	E2F1	21217	23520	1681	1996	3.76599e-14	4.07635e-09
K562	ENCFF396GUH	ENCFF225TLP	ADNP	E2F4	21217	10400	353	882	9.35575e-92	1.01268e-86
K562	ENCFF396GUH	ENCFF356ASJ	ADNP	E2F5	21217	19472	1882	1652	2.05159e-09	0.000222066
K562	ENCFF396GUH	ENCFF417DTI_ENCFF917COW	ADNP	E2F6	21217	14596	484	1238	1.62933e-132	1.76361e-127
K562	ENCFF396GUH	ENCFF310AGG	ADNP	E2F7	21217	3169	369	268	8.51239e-10	9.21389e-05
K562	ENCFF396GUH	ENCFF925DJG	ADNP	E2F8	21217	12738	1191	1081	5.13819e-05	1
K562	ENCFF396GUH	ENCFF083YCQ	ADNP	E4F1	21217	28697	2330	2435	0.000830978	1
K562	ENCFF396GUH	ENCFF806BDC	ADNP	EHMT2	21217	19437	1710	1649	0.00316466	1
K562	ENCFF396GUH	ENCFF502KHR	ADNP	ELF4	21217	21065	1294	1787	2.20776e-35	2.38971e-30
K562	ENCFF396GUH	ENCFF019PEL	ADNP	ELK1	21217	3967	181	336	6.07874e-21	6.57968e-16
K562	ENCFF396GUH	ENCFF549TYR	ADNP	EP300	21217	28288	2955	2400	8.43154e-29	9.12638e-24
K562	ENCFF396GUH	ENCFF925ANU	ADNP	EP400	21217	33534	2798	2845	0.00510426	1
K562	ENCFF396GUH	ENCFF213EPU	ADNP	ESRRA	21217	33450	3087	2838	1.75846e-07	0.0190337
K562	ENCFF396GUH	ENCFF076YZO	ADNP	ETS1	21217	11558	585	980	5.64966e-43	6.11525e-38
K562	ENCFF396GUH	ENCFF772HOY	ADNP	ETS2	21217	1762	128	149	0.00744397	1
K562	ENCFF396GUH	ENCFF404YMX	ADNP	ETV1	21217	24198	1745	2053	2.52918e-13	2.73761e-08
K562	ENCFF396GUH	ENCFF545VNY	ADNP	ETV6	21217	6732	757	571	1.72998e-14	1.87255e-09
K562	ENCFF396GUH	ENCFF820EVZ	ADNP	EWSR1	21217	1795	62	152	5.8029e-17	6.28111e-12
K562	ENCFF396GUH	ENCFF883WYX	ADNP	FIP1L1	21217	10793	223	915	4.16614e-166	4.50947e-161
K562	ENCFF396GUH	ENCFF002CVW	ADNP	FOS	21217	7646	622	648	0.00942615	1
K562	ENCFF396GUH	ENCFF473GCH	ADNP	FOSL1	21217	7973	829	676	1.35753e-09	0.000146941
K562	ENCFF396GUH	ENCFF809YFY	ADNP	FOXA1	21217	1350	145	114	0.000685407	1
K562	ENCFF396GUH	ENCFF452SPE	ADNP	FOXJ2	21217	15441	1419	1310	0.000128216	1
K562	ENCFF396GUH	ENCFF699ZII	ADNP	FOXM1	21217	18535	2725	1573	7.98905e-153	8.64743e-148
K562	ENCFF396GUH	ENCFF142CPK	ADNP	FUS	21217	2947	63	250	1.58257e-45	1.71299e-40
K562	ENCFF396GUH	ENCFF833FCO	ADNP	GABPA	21217	15847	995	1344	2.86085e-24	3.09661e-19
K562	ENCFF396GUH	ENCFF517KRT	ADNP	GABPB1	21217	30655	1420	2601	2.35944e-142	2.55388e-137
K562	ENCFF396GUH	ENCFF632NQI	ADNP	GATA1	21217	14605	1934	1239	6.1013e-75	6.6041e-70
K562	ENCFF396GUH	ENCFF732HOE	ADNP	GATA2	21217	11622	1564	986	4.60468e-65	4.98415e-60
K562	ENCFF396GUH	ENCFF253FZN	ADNP	GATAD2A	21217	15131	1544	1284	1.88843e-13	2.04405e-08
K562	ENCFF396GUH	ENCFF549KOD	ADNP	GATAD2B	21217	13320	1515	1130	2.00798e-28	2.17345e-23
K562	ENCFF396GUH	ENCFF126BCK	ADNP	GMEB1	21217	27813	2439	2360	0.00218448	1
K562	ENCFF396GUH	ENCFF167HYX	ADNP	GTF2A2	21217	6423	396	545	3.29469e-12	3.56621e-07
K562	ENCFF396GUH	ENCFF002CWR	ADNP	GTF2B	21217	2928	104	248	2.01905e-25	2.18544e-20
K562	ENCFF396GUH	ENCFF778RMG	ADNP	GTF2E2	21217	16371	1046	1389	9.2153e-23	9.97473e-18
K562	ENCFF396GUH	ENCFF002CYL	ADNP	GTF3C2	21217	1858	1045	157	0	0
K562	ENCFF396GUH	ENCFF474NLG	ADNP	HCFC1	21217	13559	593	1150	7.66799e-74	8.29991e-69
K562	ENCFF396GUH	ENCFF580DYE	ADNP	HDAC3	21217	10781	1823	914	1.36458e-154	1.47703e-149
K562	ENCFF396GUH	ENCFF998HOR	ADNP	HDAC6	21217	1761	78	149	5.55444e-11	6.01218e-06
K562	ENCFF396GUH	ENCFF939ZFS	ADNP	HDAC8	21217	9908	640	840	8.36425e-14	9.05355e-09
K562	ENCFF396GUH	ENCFF676NPW	ADNP	HES1	21217	11091	1698	941	2.93652e-109	3.17852e-104
K562	ENCFF396GUH	ENCFF265LKN	ADNP	HINFP	21217	8293	673	703	0.00803174	1
K562	ENCFF396GUH	ENCFF396NSO	ADNP	HLTF	21217	12623	1699	1071	1.7238e-70	1.86586e-65
K562	ENCFF396GUH	ENCFF558DSF	ADNP	HMBOX1	21217	28923	2061	2454	3.03981e-17	3.29032e-12
K562	ENCFF396GUH	ENCFF002CWT	ADNP	HMGN3	21217	14587	852	1237	7.88355e-32	8.53323e-27
K562	ENCFF396GUH	ENCFF292JRY	ADNP	HNRNPH1	21217	315	5	26	5.05858e-07	0.0547546
K562	ENCFF396GUH	ENCFF777CWV	ADNP	HNRNPK	21217	11589	108	983	1.4528e-278	1.57252e-273
K562	ENCFF396GUH	ENCFF010STZ	ADNP	HNRNPL	21217	8012	211	679	1.94852e-98	2.10909e-93
K562	ENCFF396GUH	ENCFF122QSN	ADNP	HNRNPLL	21217	15382	443	1305	5.94825e-169	6.43844e-164
K562	ENCFF396GUH	ENCFF768TJI	ADNP	HNRNPUL1	21217	1122	71	95	0.00170113	1
K562	ENCFF396GUH	ENCFF835YLR	ADNP	ID3	21217	24733	2203	2099	0.000673717	1
K562	ENCFF396GUH	ENCFF415YPX	ADNP	ILF3	21217	4762	501	404	3.59623e-07	0.0389259
K562	ENCFF396GUH	ENCFF176NOI	ADNP	ILK	21217	2284	202	193	0.0228195	1
K562	ENCFF396GUH	ENCFF388AJH	ADNP	IRF1	21217	17589	883	1492	6.26785e-66	6.78439e-61
K562	ENCFF396GUH	ENCFF284VUQ	ADNP	IRF1_0	21217	14592	796	1238	7.43153e-42	8.04396e-37
K562	ENCFF396GUH	ENCFF909LKK	ADNP	IRF1_1	21217	12543	826	1064	4.06027e-15	4.39488e-10
K562	ENCFF396GUH	ENCFF908UIY	ADNP	IRF1_2	21217	13478	1020	1143	1.29817e-05	1
K562	ENCFF396GUH	ENCFF730RUF	ADNP	IRF1_3	21217	1479	160	125	0.000351023	1
K562	ENCFF396GUH	ENCFF384YDT	ADNP	IRF2	21217	8509	563	722	9.83977e-11	1.06507e-05
K562	ENCFF396GUH	ENCFF196DHR	ADNP	IRF9	21217	9536	918	809	1.16067e-05	1
K562	ENCFF396GUH	ENCFF629BFI	ADNP	JUN	21217	21668	1689	1838	1.9511e-05	1
K562	ENCFF396GUH	ENCFF417QAJ	ADNP	JUN_0	21217	8729	1187	740	3.96584e-52	4.29267e-47
K562	ENCFF396GUH	ENCFF573GQX	ADNP	JUN_1	21217	4909	744	416	5.87272e-48	6.35669e-43
K562	ENCFF396GUH	ENCFF192BTP	ADNP	JUN_2	21217	6180	901	524	5.79402e-51	6.27151e-46
K562	ENCFF396GUH	ENCFF077UYM	ADNP	JUN_3	21217	9310	1060	790	1.01914e-20	1.10312e-15
K562	ENCFF396GUH	ENCFF426DUB	ADNP	JUNB	21217	5347	646	453	2.77846e-18	3.00744e-13
K562	ENCFF396GUH	ENCFF337DKJ	ADNP	JUND	21217	47775	3105	4054	2.17344e-55	2.35256e-50
K562	ENCFF396GUH	ENCFF772QPO	ADNP	KAT8	21217	2268	140	192	1.40774e-05	1
K562	ENCFF396GUH	ENCFF838COI_ENCFF738WCE	ADNP	KDM1A	21217	26253	6233	2228	0	0
K562	ENCFF396GUH	ENCFF042RAK	ADNP	KDM4B	21217	8167	371	693	1.40479e-41	1.52056e-36
K562	ENCFF396GUH	ENCFF368TYM	ADNP	KDM5B	21217	22700	644	1926	6.71479e-253	7.26816e-248
K562	ENCFF396GUH	ENCFF962VSZ	ADNP	KHSRP	21217	5187	788	440	7.33045e-51	7.93455e-46
K562	ENCFF396GUH	ENCFF717TWA	ADNP	KLF1	21217	11788	715	1000	3.72357e-22	4.03043e-17
K562	ENCFF396GUH	ENCFF802XZN	ADNP	KLF13	21217	11910	816	1010	3.01275e-11	3.26103e-06
K562	ENCFF396GUH	ENCFF844HBQ	ADNP	KLF16	21217	17908	1880	1519	4.52875e-20	4.90196e-15
K562	ENCFF396GUH	ENCFF314ULQ	ADNP	L3MBTL2	21217	53984	2766	4581	4.8813e-185	5.28356e-180
K562	ENCFF396GUH	ENCFF511OXK	ADNP	LARP7	21217	9680	910	821	0.000125362	1
K562	ENCFF396GUH	ENCFF659WAF	ADNP	LEF1	21217	21936	2565	1861	1.69829e-54	1.83825e-49
K562	ENCFF396GUH	ENCFF308IXJ	ADNP	MAFF	21217	27637	1101	2345	2.17312e-181	2.35221e-176
K562	ENCFF396GUH	ENCFF927JBT	ADNP	MAFG	21217	46186	1577	3919	0	0
K562	ENCFF396GUH	ENCFF812QPN	ADNP	MAFK	21217	26965	1164	2288	3.61779e-149	3.91593e-144
K562	ENCFF396GUH	ENCFF799HIG_ENCFF422NGZ	ADNP	MAX	21217	28672	1454	2433	8.45833e-103	9.15538e-98
K562	ENCFF396GUH	ENCFF470MLY	ADNP	MBD2	21217	15555	1199	1320	3.76514e-05	1
K562	ENCFF396GUH	ENCFF226CZE	ADNP	MCM2	21217	4703	194	399	1.51936e-30	1.64457e-25
K562	ENCFF396GUH	ENCFF679ITJ	ADNP	MCM3	21217	2788	55	236	8.1843e-46	8.85877e-41
K562	ENCFF396GUH	ENCFF920RYJ	ADNP	MCM5	21217	1736	30	147	5.68291e-32	6.15124e-27
K562	ENCFF396GUH	ENCFF577UJR	ADNP	MEF2A	21217	1348	168	114	4.44629e-07	0.0481271
K562	ENCFF396GUH	ENCFF257RYT	ADNP	MEF2D	21217	14762	1751	1252	4.01172e-41	4.34233e-36
K562	ENCFF396GUH	ENCFF613RNG	ADNP	MEIS2	21217	53002	2448	4498	2.42146e-246	2.62102e-241
K562	ENCFF396GUH	ENCFF670ZCR	ADNP	MGA	21217	33894	1649	2876	2.87709e-137	3.11419e-132
K562	ENCFF396GUH	ENCFF365NKO	ADNP	MIER1	21217	9498	1046	806	8.28127e-17	8.96373e-12
K562	ENCFF396GUH	ENCFF497XOD	ADNP	MITF	21217	34801	1817	2953	6.81493e-113	7.37655e-108
K562	ENCFF396GUH	ENCFF973OME_ENCFF059ONJ	ADNP	MNT	21217	17605	1200	1494	3.81886e-16	4.13357e-11
K562	ENCFF396GUH	ENCFF769GYG	ADNP	MTA1	21217	17990	2334	1526	1.24646e-82	1.34918e-77
K562	ENCFF396GUH	ENCFF350YXB	ADNP	MTA3	21217	28818	2275	2445	1.9682e-05	1
K562	ENCFF396GUH	ENCFF970LCB	ADNP	MXI1	21217	9033	561	766	1.20273e-15	1.30185e-10
K562	ENCFF396GUH	ENCFF877ANE	ADNP	MYBL2	21217	4580	539	388	7.37006e-14	7.97743e-09
K562	ENCFF396GUH	ENCFF465JKF	ADNP	MYC	21217	31436	1938	2667	1.25179e-50	1.35495e-45
K562	ENCFF396GUH	ENCFF099SDW	ADNP	MYC_0	21217	21468	1485	1821	4.35073e-17	4.70928e-12
K562	ENCFF396GUH	ENCFF634AYU	ADNP	MYC_1	21217	8915	648	756	4.70741e-06	0.509535
K562	ENCFF396GUH	ENCFF676YJE	ADNP	MYC_2	21217	37659	2354	3196	7.09533e-56	7.68005e-51
K562	ENCFF396GUH	ENCFF387LTN	ADNP	MYC_3	21217	12479	908	1059	1.61043e-07	0.0174315
K562	ENCFF396GUH	ENCFF583DZD	ADNP	MYNN	21217	15422	1292	1308	0.0100595	1
K562	ENCFF396GUH	ENCFF074EZL	ADNP	NBN	21217	20957	2794	1778	4.71779e-110	5.10659e-105
K562	ENCFF396GUH	ENCFF495CSO	ADNP	NCOA4	21217	3079	641	261	1.25862e-87	1.36235e-82
K562	ENCFF396GUH	ENCFF322DSX	ADNP	NCOA6	21217	4645	386	394	0.0187072	1
K562	ENCFF396GUH	ENCFF165BCW_ENCFF366UBB	ADNP	NCOR1	21217	17482	2351	1483	2.63508e-96	2.85224e-91
K562	ENCFF396GUH	ENCFF002CXG	ADNP	NELFE	21217	458	7	38	7.1263e-10	7.71358e-05
K562	ENCFF396GUH	ENCFF581YKY	ADNP	NEUROD1	21217	14353	1250	1218	0.00743779	1
K562	ENCFF396GUH	ENCFF495MHZ	ADNP	NFE2	21217	30144	1903	2558	9.14113e-43	9.89445e-38
K562	ENCFF396GUH	ENCFF175IUO	ADNP	NFE2L1	21217	7430	420	630	1.11093e-19	1.20248e-14
K562	ENCFF396GUH	ENCFF370ENX	ADNP	NFIC	21217	48576	2719	4122	7.736e-121	8.37352e-116
K562	ENCFF396GUH	ENCFF157UUF	ADNP	NFRKB	21217	22856	1559	1939	4.56322e-20	4.93928e-15
K562	ENCFF396GUH	ENCFF986MHU	ADNP	NFXL1	21217	6160	1100	522	1.01857e-107	1.10251e-102
K562	ENCFF396GUH	ENCFF012VES	ADNP	NFYA	21217	4382	126	371	1.74869e-49	1.8928e-44
K562	ENCFF396GUH	ENCFF113PMT	ADNP	NFYB	21217	8952	135	759	5.93334e-172	6.42231e-167
K562	ENCFF396GUH	ENCFF906PGD	ADNP	NKRF	21217	18069	1346	1533	7.38554e-08	0.00799418
K562	ENCFF396GUH	ENCFF776YPS	ADNP	NONO	21217	12558	1065	1065	0.0122237	1
K562	ENCFF396GUH	ENCFF954NAJ	ADNP	NR0B1	21217	405	15	34	0.000122934	1
K562	ENCFF396GUH	ENCFF664ZGR	ADNP	NR2C1	21217	15500	1296	1315	0.00965335	1
K562	ENCFF396GUH	ENCFF594LCH	ADNP	NR2C2	21217	634	9	53	8.73197e-14	9.45157e-09
K562	ENCFF396GUH	ENCFF175IIE	ADNP	NR2F1	21217	37884	3076	3215	0.00034096	1
K562	ENCFF396GUH	ENCFF255EOB	ADNP	NR2F2	21217	21050	2113	1786	4.63036e-15	5.01195e-10
K562	ENCFF396GUH	ENCFF712AXK	ADNP	NR2F6	21217	23333	2191	1980	1.63189e-07	0.0176637
K562	ENCFF396GUH	ENCFF859NPS	ADNP	NR4A1	21217	20688	1789	1755	0.00679934	1
K562	ENCFF396GUH	ENCFF144PPR_ENCFF493ABN	ADNP	NRF1	21217	17306	560	1468	1.85634e-162	2.00932e-157
K562	ENCFF396GUH	ENCFF289BUU	ADNP	NUFIP1	21217	3572	499	303	1.82476e-25	1.97514e-20
K562	ENCFF396GUH	ENCFF168HAG	ADNP	PBX2	21217	36719	1964	3116	2.20087e-109	2.38224e-104
K562	ENCFF396GUH	ENCFF941RVL	ADNP	PCBP1	21217	10920	203	926	1.78817e-182	1.93553e-177
K562	ENCFF396GUH	ENCFF881XQF	ADNP	PCBP2	21217	2539	15	215	3.1388e-71	3.39747e-66
K562	ENCFF396GUH	ENCFF462FRU	ADNP	PHB2	21217	7367	1260	625	1.47784e-110	1.59963e-105
K562	ENCFF396GUH	ENCFF948YVM	ADNP	PHF20	21217	15696	2122	1332	7.48912e-89	8.1063e-84
K562	ENCFF396GUH	ENCFF134CUM	ADNP	PHF21A	21217	8976	881	761	1.65892e-06	0.179563
K562	ENCFF396GUH	ENCFF626KTJ	ADNP	PHF8	21217	29046	728	2465	0	0
K562	ENCFF396GUH	ENCFF544XKC	ADNP	PKNOX1	21217	52588	2364	4463	5.56275e-262	6.02118e-257
K562	ENCFF396GUH	ENCFF881QBT	ADNP	PML	21217	21322	1856	1809	0.00505483	1
K562	ENCFF396GUH	ENCFF662YQK	ADNP	POLR2A_0	21217	19534	534	1657	1.36633e-227	1.47893e-222
K562	ENCFF396GUH	ENCFF853ZMA	ADNP	POLR2A_1	21217	22578	511	1916	0	0
K562	ENCFF396GUH	ENCFF206YXX	ADNP	POLR2A_2	21217	19284	523	1636	8.01888e-227	8.67972e-222
K562	ENCFF396GUH	ENCFF270QAB	ADNP	POLR2A_3	21217	23423	601	1987	2.46957e-292	2.67309e-287
K562	ENCFF396GUH	ENCFF296CNQ	ADNP	POLR2AphosphoS2	21217	10069	162	854	8.29641e-186	8.98012e-181
K562	ENCFF396GUH	ENCFF542DOG	ADNP	POLR2AphosphoS5	21217	30324	1726	2573	2.64002e-71	2.85759e-66
K562	ENCFF396GUH	ENCFF872JJJ	ADNP	POLR2B	21217	20684	681	1755	5.38947e-189	5.83361e-184
K562	ENCFF396GUH	ENCFF273EYJ	ADNP	POLR2G	21217	58571	708	4970	0	0
K562	ENCFF396GUH	ENCFF801YZV	ADNP	POLR2H	21217	23424	1433	1987	6.92423e-40	7.49486e-35
K562	ENCFF396GUH	ENCFF002CXW	ADNP	POLR3A	21217	1310	557	111	5.33104e-199	5.77037e-194
K562	ENCFF396GUH	ENCFF002CXT	ADNP	POLR3G	21217	207	129	17	4.4479e-67	4.81445e-62
K562	ENCFF396GUH	ENCFF990CFV	ADNP	POU5F1	21217	2219	72	188	2.0184e-22	2.18473e-17
K562	ENCFF396GUH	ENCFF294HEI	ADNP	PRDM10	21217	29758	1416	2525	1.22835e-128	1.32958e-123
K562	ENCFF396GUH	ENCFF785ACI	ADNP	PRPF4	21217	6788	137	576	2.10946e-107	2.2833e-102
K562	ENCFF396GUH	ENCFF694BIA	ADNP	PTBP1	21217	5027	1492	426	0	0
K562	ENCFF396GUH	ENCFF007DKB	ADNP	PTRF	21217	5154	411	437	0.00893565	1
K562	ENCFF396GUH	ENCFF332DRG	ADNP	PTTG1	21217	5547	454	470	0.0142122	1
K562	ENCFF396GUH	ENCFF421KIV	ADNP	PYGO2	21217	4223	583	358	2.90609e-28	3.14558e-23
K562	ENCFF396GUH	ENCFF002CXU	ADNP	RAD21	21217	17627	370	1495	1.31227e-266	1.42041e-261
K562	ENCFF396GUH	ENCFF096XMD	ADNP	RAD51	21217	17974	1284	1525	2.00733e-11	2.17275e-06
K562	ENCFF396GUH	ENCFF975IRM	ADNP	RB1	21217	25768	1196	2186	2.32046e-119	2.51169e-114
K562	ENCFF396GUH	ENCFF379MPS	ADNP	RBBP5	21217	24338	877	2065	2.30022e-192	2.48979e-187
K562	ENCFF396GUH	ENCFF120IDE	ADNP	RBFOX2	21217	56370	1121	4784	0	0
K562	ENCFF396GUH	ENCFF682SIY	ADNP	RBM14	21217	3099	57	263	1.2891e-53	1.39533e-48
K562	ENCFF396GUH	ENCFF971VJZ	ADNP	RBM15	21217	400	9	33	5.9586e-07	0.0644965
K562	ENCFF396GUH	ENCFF861YKK	ADNP	RBM17	21217	47	2	3	0.224042	1
K562	ENCFF396GUH	ENCFF522JUV	ADNP	RBM22	21217	13050	191	1107	2.51931e-254	2.72692e-249
K562	ENCFF396GUH	ENCFF680WBN	ADNP	RBM25	21217	49721	6998	4219	0	0
K562	ENCFF396GUH	ENCFF782GWS	ADNP	RBM34	21217	1085	14	92	3.95848e-24	4.2847e-19
K562	ENCFF396GUH	ENCFF209JJD	ADNP	RBM39	21217	2747	221	233	0.0195877	1
K562	ENCFF396GUH	ENCFF484CKD	ADNP	RCOR1	21217	6822	1474	578	7.25831e-213	7.85647e-208
K562	ENCFF396GUH	ENCFF580QGA	ADNP	RELA	21217	10319	801	875	0.000562422	1
K562	ENCFF396GUH	ENCFF237UAN_ENCFF010UHD	ADNP	RFX1	21217	13929	286	1182	3.10926e-215	3.3655e-210
K562	ENCFF396GUH	ENCFF716LRI	ADNP	RFX5	21217	2725	226	231	0.0251202	1
K562	ENCFF396GUH	ENCFF209HKW	ADNP	RLF	21217	10587	1528	898	7.58762e-82	8.21291e-77
K562	ENCFF396GUH	ENCFF478MPX	ADNP	SAFB	21217	5923	110	502	7.2554e-100	7.85332e-95
K562	ENCFF396GUH	ENCFF624NUZ	ADNP	SAFB2	21217	82	4	6	0.133853	1
K562	ENCFF396GUH	ENCFF718NUA	ADNP	SAP30	21217	14058	228	1193	1.5577e-257	1.68607e-252
K562	ENCFF396GUH	ENCFF294EHN	ADNP	SETDB1	21217	4113	161	349	8.82749e-30	9.55497e-25
K562	ENCFF396GUH	ENCFF757ODD	ADNP	SFPQ	21217	228	3	19	6.40493e-06	0.693276
K562	ENCFF396GUH	ENCFF191MPD	ADNP	SIN3A	21217	13459	411	1142	1.72351e-137	1.86555e-132
K562	ENCFF396GUH	ENCFF280GTU	ADNP	SIN3B	21217	10501	335	891	1.54728e-101	1.67479e-96
K562	ENCFF396GUH	ENCFF002CXZ	ADNP	SIRT6	21217	2305	635	195	5.00842e-137	5.42117e-132
K562	ENCFF396GUH	ENCFF033EBX_ENCFF002CMM	ADNP	SIX5	21217	3194	82	271	1.35722e-41	1.46907e-36
K562	ENCFF396GUH	ENCFF481WGW	ADNP	SKIL	21217	24313	2114	2063	0.00464294	1
K562	ENCFF396GUH	ENCFF315YAF	ADNP	SMAD1	21217	8855	734	751	0.0121286	1
K562	ENCFF396GUH	ENCFF011KRN	ADNP	SMAD2	21217	200	5	16	0.000983347	1
K562	ENCFF396GUH	ENCFF178MOP	ADNP	SMAD5	21217	22325	557	1894	4.32014e-287	4.67616e-282
K562	ENCFF396GUH	ENCFF995NIE	ADNP	SMARCA5	21217	19278	5253	1636	0	0
K562	ENCFF396GUH	ENCFF944GJH	ADNP	SMARCB1	21217	3079	430	261	2.7787e-22	3.00769e-17
K562	ENCFF396GUH	ENCFF114PTZ	ADNP	SMARCC2	21217	19106	2649	1621	2.06624e-121	2.23652e-116
K562	ENCFF396GUH	ENCFF622RBW	ADNP	SMARCE1	21217	36356	3943	3085	1.64361e-50	1.77906e-45
K562	ENCFF396GUH	ENCFF041YQC	ADNP	SMC3	21217	26872	725	2280	0	0
K562	ENCFF396GUH	ENCFF494ZUY	ADNP	SNIP1	21217	3268	253	277	0.00859071	1
K562	ENCFF396GUH	ENCFF033KXY	ADNP	SNRNP70	21217	882	13	74	2.33314e-18	2.52541e-13
K562	ENCFF396GUH	ENCFF241TBP	ADNP	SOX6	21217	37311	3427	3166	1.92556e-07	0.0208424
K562	ENCFF396GUH	ENCFF300XUA	ADNP	SP1	21217	14898	467	1264	1.19777e-146	1.29648e-141
K562	ENCFF396GUH	ENCFF002CMJ	ADNP	SPI1	21217	28677	901	2433	3.10002e-279	3.35549e-274
K562	ENCFF396GUH	ENCFF985TSH	ADNP	SREBF1	21217	2865	161	243	4.66411e-09	0.000504848
K562	ENCFF396GUH	ENCFF798URE	ADNP	SRSF1	21217	1170	33	99	8.35838e-15	9.04719e-10
K562	ENCFF396GUH	ENCFF722XRW	ADNP	SRSF3	21217	1984	36	168	3.79425e-35	4.10693e-30
K562	ENCFF396GUH	ENCFF059WVE	ADNP	SRSF7	21217	208	1	17	7.03789e-07	0.0761789
K562	ENCFF396GUH	ENCFF137IBM	ADNP	SRSF9	21217	29	0	2	0.135335	1
K562	ENCFF396GUH	ENCFF290HTJ	ADNP	STAT1_0	21217	1337	220	113	1.7511e-19	1.89541e-14
K562	ENCFF396GUH	ENCFF254MPF	ADNP	STAT1_1	21217	1283	164	108	1.15044e-07	0.0124525
K562	ENCFF396GUH	ENCFF498DOQ	ADNP	STAT1_2	21217	957	82	81	0.0437413	1
K562	ENCFF396GUH	ENCFF648NYF	ADNP	STAT1_3	21217	2831	218	240	0.00954053	1
K562	ENCFF396GUH	ENCFF841YFF	ADNP	STAT2_0	21217	2097	276	177	1.33411e-12	1.44406e-07
K562	ENCFF396GUH	ENCFF714VIT	ADNP	STAT2_1	21217	3606	546	306	1.44424e-35	1.56326e-30
K562	ENCFF396GUH	ENCFF696KPD	ADNP	STAT5A	21217	13378	1786	1135	1.15608e-71	1.25135e-66
K562	ENCFF396GUH	ENCFF484HCG	ADNP	SUPT5H	21217	29659	784	2517	0	0
K562	ENCFF396GUH	ENCFF822FWM	ADNP	TAF1	21217	19025	733	1614	6.71343e-134	7.26668e-129
K562	ENCFF396GUH	ENCFF617CAZ	ADNP	TAF15	21217	787	11	66	5.62849e-17	6.09233e-12
K562	ENCFF396GUH	ENCFF034CQR	ADNP	TAF7	21217	648	17	54	2.80365e-09	0.00030347
K562	ENCFF396GUH	ENCFF785HXY	ADNP	TAF9B	21217	15392	1257	1306	0.0044352	1
K562	ENCFF396GUH	ENCFF284LRP_ENCFF482CEV	ADNP	TAL1	21217	19046	2187	1616	3.35024e-42	3.62634e-37
K562	ENCFF396GUH	ENCFF626MVT	ADNP	TBL1XR1	21217	15770	1871	1338	9.84339e-44	1.06546e-38
K562	ENCFF396GUH	ENCFF380FJL	ADNP	TBP	21217	21570	1418	1830	1.49441e-24	1.61756e-19
K562	ENCFF396GUH	ENCFF249EZR	ADNP	TCF7	21217	5844	582	495	1.19414e-05	1
K562	ENCFF396GUH	ENCFF312RFN	ADNP	TCF7L2	21217	2119	162	179	0.0136045	1
K562	ENCFF396GUH	ENCFF619BDC	ADNP	TEAD2	21217	6623	651	562	1.9204e-05	1
K562	ENCFF396GUH	ENCFF209MQX	ADNP	TEAD4	21217	35771	3122	3035	0.00207606	1
K562	ENCFF396GUH	ENCFF701MXF	ADNP	TFDP1	21217	22661	1408	1923	9.44537e-36	1.02238e-30
K562	ENCFF396GUH	ENCFF641LJY	ADNP	THAP1	21217	5972	201	506	3.81207e-54	4.12623e-49
K562	ENCFF396GUH	ENCFF671BFH	ADNP	THRA	21217	1757	162	149	0.018051	1
K562	ENCFF396GUH	ENCFF294VWT	ADNP	THRAP3	21217	4904	481	416	0.000144882	1
K562	ENCFF396GUH	ENCFF262BVP	ADNP	TOE1	21217	19775	2286	1678	9.96692e-46	1.07883e-40
K562	ENCFF396GUH	ENCFF049CRW_ENCFF646VQW	ADNP	TRIM24	21217	15621	2082	1325	1.19995e-82	1.29884e-77
K562	ENCFF396GUH	ENCFF561IZB	ADNP	TRIP13	21217	2520	289	213	1.19935e-07	0.0129819
K562	ENCFF396GUH	ENCFF036YVI	ADNP	TSC22D4	21217	3352	134	284	1.27506e-23	1.38014e-18
K562	ENCFF396GUH	ENCFF730URE	ADNP	U2AF1	21217	4352	99	369	8.14597e-63	8.81728e-58
K562	ENCFF396GUH	ENCFF398EQF	ADNP	U2AF2	21217	137	1	11	0.000183719	1
K562	ENCFF396GUH	ENCFF671DOL	ADNP	UBTF	21217	19212	667	1630	6.3155e-162	6.83596e-157
K562	ENCFF396GUH	ENCFF334FMW	ADNP	USF1	21217	21340	927	1811	6.43427e-117	6.96451e-112
K562	ENCFF396GUH	ENCFF150VTD	ADNP	USF2	21217	3664	177	310	6.24172e-17	6.7561e-12
K562	ENCFF396GUH	ENCFF186QUP	ADNP	VEZF1	21217	46383	2568	3936	1.10334e-120	1.19426e-115
K562	ENCFF396GUH	ENCFF803LEC	ADNP	XRCC3	21217	1986	133	168	0.000679628	1
K562	ENCFF396GUH	ENCFF998KKJ	ADNP	XRCC5	21217	13253	821	1124	3.59647e-22	3.89285e-17
K562	ENCFF396GUH	ENCFF706LIT	ADNP	YBX1	21217	1358	81	115	0.000161975	1
K562	ENCFF396GUH	ENCFF246HIU	ADNP	YBX3	21217	2680	159	227	3.58037e-07	0.0387543
K562	ENCFF396GUH	ENCFF926FUM_ENCFF328XKC	ADNP	YY1	21217	12127	419	1029	7.31896e-104	7.92211e-99
K562	ENCFF396GUH	ENCFF253FON	ADNP	ZBED1	21217	5913	593	501	5.64615e-06	0.611145
K562	ENCFF396GUH	ENCFF434QZL	ADNP	ZBTB11	21217	7250	320	615	1.05534e-39	1.14231e-34
K562	ENCFF396GUH	ENCFF561USY	ADNP	ZBTB2	21217	18423	1810	1563	8.13425e-11	8.80459e-06
K562	ENCFF396GUH	ENCFF408FQC	ADNP	ZBTB33	21217	60931	1576	5171	0	0
K562	ENCFF396GUH	ENCFF417LEJ	ADNP	ZBTB40	21217	29759	1558	2525	5.5588e-96	6.0169e-91
K562	ENCFF396GUH	ENCFF706ISJ	ADNP	ZBTB7A	21217	30583	859	2595	0	0
K562	ENCFF396GUH	ENCFF589EVD	ADNP	ZBTB8A	21217	955	165	81	9.72439e-17	1.05258e-11
K562	ENCFF396GUH	ENCFF522JRK	ADNP	ZC3H11A	21217	2624	181	222	0.000519832	1
K562	ENCFF396GUH	ENCFF809OEX	ADNP	ZC3H8	21217	12691	1751	1077	1.28642e-79	1.39243e-74
K562	ENCFF396GUH	ENCFF521CRG	ADNP	ZFP36	21217	23635	2269	2005	4.85032e-10	5.25003e-05
K562	ENCFF396GUH	ENCFF396DNK	ADNP	ZFP91	21217	14258	1261	1210	0.00389198	1
K562	ENCFF396GUH	ENCFF433RKB	ADNP	ZFX	21217	27044	836	2295	1.42559e-269	1.54308e-264
K562	ENCFF396GUH	ENCFF195ODE	ADNP	ZHX1	21217	3453	226	293	6.44971e-06	0.698123
K562	ENCFF396GUH	ENCFF163VUK	ADNP	ZKSCAN1	21217	14153	1028	1201	2.5306e-08	0.00273914
K562	ENCFF396GUH	ENCFF529FWJ	ADNP	ZKSCAN8	21217	11311	1290	959	4.81213e-25	5.2087e-20
K562	ENCFF396GUH	ENCFF597DIY	ADNP	ZMIZ1	21217	1049	57	89	7.16602e-05	1
K562	ENCFF396GUH	ENCFF511QHY	ADNP	ZMYM3	21217	39230	8189	3329	0	0
K562	ENCFF396GUH	ENCFF114IWY	ADNP	ZNF143	21217	29873	2562	2535	0.00682938	1
K562	ENCFF396GUH	ENCFF116DIO	ADNP	ZNF148	21217	22956	1245	1948	6.26151e-66	6.77752e-61
K562	ENCFF396GUH	ENCFF721LDD	ADNP	ZNF175	21217	18917	1475	1605	4.6308e-05	1
K562	ENCFF396GUH	ENCFF853TZC	ADNP	ZNF197	21217	10450	1217	886	1.09123e-26	1.18115e-21
K562	ENCFF396GUH	ENCFF891MVM	ADNP	ZNF263	21217	3994	70	338	1.42636e-70	1.54391e-65
K562	ENCFF396GUH	ENCFF344QKL	ADNP	ZNF274	21217	3064	410	260	2.16917e-18	2.34793e-13
K562	ENCFF396GUH	ENCFF386WKY	ADNP	ZNF280A	21217	6438	259	546	4.36375e-43	4.72336e-38
K562	ENCFF396GUH	ENCFF581ZZT	ADNP	ZNF282	21217	12961	1238	1099	2.4459e-06	0.264747
K562	ENCFF396GUH	ENCFF921WMN	ADNP	ZNF318	21217	10963	1403	930	8.09673e-48	8.76398e-43
K562	ENCFF396GUH	ENCFF744SVC	ADNP	ZNF354B	21217	4779	200	405	5.06817e-30	5.48583e-25
K562	ENCFF396GUH	ENCFF706SJZ	ADNP	ZNF384	21217	19825	1529	1682	7.77182e-06	0.841229
K562	ENCFF396GUH	ENCFF388YOB	ADNP	ZNF395	21217	25387	1872	2154	3.74198e-11	4.05036e-06
K562	ENCFF396GUH	ENCFF834WGJ	ADNP	ZNF507	21217	11748	146	997	5.59574e-250	6.05689e-245
K562	ENCFF396GUH	ENCFF447QUG	ADNP	ZNF512	21217	23246	398	1972	0	0
K562	ENCFF396GUH	ENCFF815TTY	ADNP	ZNF584	21217	15035	1240	1275	0.00697594	1
K562	ENCFF396GUH	ENCFF602AXP	ADNP	ZNF589	21217	21343	1771	1811	0.00607442	1
K562	ENCFF396GUH	ENCFF273TYA	ADNP	ZNF592	21217	35259	2455	2992	3.97201e-25	4.29934e-20
K562	ENCFF396GUH	ENCFF173NRW	ADNP	ZNF644	21217	12705	1524	1078	3.52075e-38	3.81089e-33
K562	ENCFF396GUH	ENCFF248AOD	ADNP	ZNF766	21217	26482	2199	2247	0.00507601	1
K562	ENCFF396GUH	ENCFF654BMD	ADNP	ZNF83	21217	11272	1395	956	5.51588e-41	5.97044e-36
K562	ENCFF396GUH	ENCFF996IVU	ADNP	ZNF830	21217	3460	315	293	0.0100368	1
K562	ENCFF396GUH	ENCFF253NXR	ADNP	ZSCAN29	21217	17315	1694	1469	7.2161e-10	7.81078e-05
K562	ENCFF396GUH	ENCFF588OLK	ADNP	ZZZ3	21217	3029	206	257	0.000121439	1
K562	ENCFF360BTO	ENCFF836VRV	AFF1	2001-08-01	20613	11428	526	942	4.8542e-50	5.25423e-45
K562	ENCFF360BTO	ENCFF396GUH	AFF1	ADNP	20613	21217	2131	1749	1.02529e-19	1.10978e-14
K562	ENCFF360BTO	ENCFF360BTO	AFF1	AFF1	20613	20613	20613	1699	0	0
K562	ENCFF360BTO	ENCFF010MMQ	AFF1	ARHGAP35	20613	5027	1017	414	1.04888e-137	1.13531e-132
K562	ENCFF360BTO	ENCFF225MPC	AFF1	ARID1B	20613	50204	8738	4139	0	0
K562	ENCFF360BTO	ENCFF332ICQ	AFF1	ARID2	20613	11835	2086	975	2.60852e-209	2.82349e-204
K562	ENCFF360BTO	ENCFF835KAT	AFF1	ARID3A	20613	11550	3411	952	0	0
K562	ENCFF360BTO	ENCFF235ZZP	AFF1	ASH1L	20613	8152	2364	672	0	0
K562	ENCFF360BTO	ENCFF002CVM	AFF1	ATF1	20613	14864	4079	1225	0	0
K562	ENCFF360BTO	ENCFF968KBN	AFF1	ATF2	20613	46506	3751	3834	0.00263516	1
K562	ENCFF360BTO	ENCFF958KNK	AFF1	ATF3	20613	59815	5845	4931	1.02864e-37	1.11341e-32
K562	ENCFF360BTO	ENCFF710IEF	AFF1	ATF4	20613	42275	4567	3485	2.41542e-69	2.61448e-64
K562	ENCFF360BTO	ENCFF868QLL	AFF1	ATF7	20613	47113	9378	3884	0	0
K562	ENCFF360BTO	ENCFF423EMU	AFF1	BACH1	20613	4708	967	388	1.14168e-134	1.23576e-129
K562	ENCFF360BTO	ENCFF057ZUY	AFF1	BCOR	20613	44533	6248	3671	0	0
K562	ENCFF360BTO	ENCFF002CVP	AFF1	BDP1	20613	570	220	46	2.95466e-76	3.19815e-71
K562	ENCFF360BTO	ENCFF179NDS	AFF1	BHLHE40	20613	27327	5199	2253	0	0
K562	ENCFF360BTO	ENCFF048OIZ	AFF1	BMI1	20613	2818	329	232	3.60465e-10	3.90171e-05
K562	ENCFF360BTO	ENCFF549GMO	AFF1	BRCA1	20613	951	8	78	4.53176e-24	4.90522e-19
K562	ENCFF360BTO	ENCFF714XHL	AFF1	BRD4	20613	8192	1949	675	0	0
K562	ENCFF360BTO	ENCFF666LZV	AFF1	BRD9	20613	18855	6947	1554	0	0
K562	ENCFF360BTO	ENCFF002CVR	AFF1	BRF1	20613	221	141	18	7.90303e-75	8.55432e-70
K562	ENCFF360BTO	ENCFF002CVS	AFF1	BRF2	20613	1087	68	89	0.00324978	1
K562	ENCFF360BTO	ENCFF996ZGL	AFF1	C11orf30	20613	61206	4459	5046	2.17422e-18	2.3534e-13
K562	ENCFF360BTO	ENCFF642BNC	AFF1	CBFA2T2	20613	32296	5074	2662	0	0
K562	ENCFF360BTO	ENCFF993GXU	AFF1	CBFA2T3	20613	53515	6577	4412	3.45173e-203	3.73618e-198
K562	ENCFF360BTO	ENCFF484DKT	AFF1	CBX1	20613	14582	2410	1202	2.79457e-206	3.02487e-201
K562	ENCFF360BTO	ENCFF455TDM	AFF1	CBX3	20613	26746	5489	2205	0	0
K562	ENCFF360BTO	ENCFF062ARS	AFF1	CBX5	20613	7083	1400	584	6.46924e-180	7.00237e-175
K562	ENCFF360BTO	ENCFF456PQY	AFF1	CBX8	20613	4702	12	387	1.99632e-146	2.16084e-141
K562	ENCFF360BTO	ENCFF874QUM	AFF1	CC2D1A	20613	26447	6904	2180	0	0
K562	ENCFF360BTO	ENCFF583GKE	AFF1	CCAR2	20613	543	239	44	2.79946e-93	3.03017e-88
K562	ENCFF360BTO	ENCFF002CVU	AFF1	CCNT2	20613	20057	4132	1653	0	0
K562	ENCFF360BTO	ENCFF643TEZ	AFF1	CDC5L	20613	5690	1851	469	0	0
K562	ENCFF360BTO	ENCFF813LOW_ENCFF429XKT	AFF1	CEBPB	20613	19338	3193	1594	8.38929e-272	9.08065e-267
K562	ENCFF360BTO	ENCFF925MHB	AFF1	CEBPZ	20613	1303	186	107	1.29181e-12	1.39827e-07
K562	ENCFF360BTO	ENCFF859FVX	AFF1	CHAMP1	20613	14318	4282	1180	0	0
K562	ENCFF360BTO	ENCFF684MLP	AFF1	COPS2	20613	123	3	10	0.00756665	1
K562	ENCFF360BTO	ENCFF665FHC	AFF1	CREB3	20613	14139	3215	1165	0	0
K562	ENCFF360BTO	ENCFF582YPB	AFF1	CREB3L1	20613	22194	5172	1829	0	0
K562	ENCFF360BTO	ENCFF948TXN	AFF1	CREM	20613	38796	7311	3198	0	0
K562	ENCFF360BTO	ENCFF117EWO	AFF1	CSDE1	20613	5866	1543	483	0	0
K562	ENCFF360BTO	ENCFF152VMJ	AFF1	CTBP1	20613	48724	8686	4017	0	0
K562	ENCFF360BTO	ENCFF002DDJ_ENCFF002DBD	AFF1	CTCF	20613	40743	1657	3359	2.16072e-233	2.33879e-228
K562	ENCFF360BTO	ENCFF962FQM	AFF1	CTCFL	20613	12832	1087	1058	0.00816034	1
K562	ENCFF360BTO	ENCFF517YCC	AFF1	CUX1	20613	6367	1813	524	0	0
K562	ENCFF360BTO	ENCFF526HLP	AFF1	DACH1	20613	19460	3392	1604	0	0
K562	ENCFF360BTO	ENCFF338HQY	AFF1	DDX20	20613	10079	4230	831	0	0
K562	ENCFF360BTO	ENCFF786WZD	AFF1	DEAF1	20613	3565	968	293	7.19815e-212	7.79135e-207
K562	ENCFF360BTO	ENCFF408SNO	AFF1	DIDO1	20613	7905	2588	651	0	0
K562	ENCFF360BTO	ENCFF034PQD	AFF1	DNMT1	20613	3604	1429	297	0	0
K562	ENCFF360BTO	ENCFF774QKS_ENCFF823SYE	AFF1	DPF2	20613	20210	6991	1666	0	0
K562	ENCFF360BTO	ENCFF106DAY	AFF1	E2F1	20613	23520	5143	1939	0	0
K562	ENCFF360BTO	ENCFF225TLP	AFF1	E2F4	20613	10400	1788	857	1.73565e-169	1.87869e-164
K562	ENCFF360BTO	ENCFF356ASJ	AFF1	E2F5	20613	19472	4854	1605	0	0
K562	ENCFF360BTO	ENCFF417DTI_ENCFF917COW	AFF1	E2F6	20613	14596	2046	1203	1.46637e-108	1.58721e-103
K562	ENCFF360BTO	ENCFF310AGG	AFF1	E2F7	20613	3169	1209	261	0	0
K562	ENCFF360BTO	ENCFF925DJG	AFF1	E2F8	20613	12738	4724	1050	0	0
K562	ENCFF360BTO	ENCFF083YCQ	AFF1	E4F1	20613	28697	7758	2366	0	0
K562	ENCFF360BTO	ENCFF806BDC	AFF1	EHMT2	20613	19437	5299	1602	0	0
K562	ENCFF360BTO	ENCFF502KHR	AFF1	ELF4	20613	21065	5928	1736	0	0
K562	ENCFF360BTO	ENCFF019PEL	AFF1	ELK1	20613	3967	1027	327	4.55956e-209	4.93532e-204
K562	ENCFF360BTO	ENCFF549TYR	AFF1	EP300	20613	28288	7262	2332	0	0
K562	ENCFF360BTO	ENCFF925ANU	AFF1	EP400	20613	33534	8406	2764	0	0
K562	ENCFF360BTO	ENCFF213EPU	AFF1	ESRRA	20613	33450	6310	2758	0	0
K562	ENCFF360BTO	ENCFF076YZO	AFF1	ETS1	20613	11558	2470	952	0	0
K562	ENCFF360BTO	ENCFF772HOY	AFF1	ETS2	20613	1762	202	145	1.31281e-06	0.142099
K562	ENCFF360BTO	ENCFF404YMX	AFF1	ETV1	20613	24198	5679	1995	0	0
K562	ENCFF360BTO	ENCFF545VNY	AFF1	ETV6	20613	6732	2440	555	0	0
K562	ENCFF360BTO	ENCFF820EVZ	AFF1	EWSR1	20613	1795	135	148	0.0190511	1
K562	ENCFF360BTO	ENCFF883WYX	AFF1	FIP1L1	20613	10793	926	889	0.00613364	1
K562	ENCFF360BTO	ENCFF002CVW	AFF1	FOS	20613	7646	1753	630	3.85466e-294	4.17232e-289
K562	ENCFF360BTO	ENCFF473GCH	AFF1	FOSL1	20613	7973	1992	657	0	0
K562	ENCFF360BTO	ENCFF809YFY	AFF1	FOXA1	20613	1350	340	111	3.12955e-68	3.38745e-63
K562	ENCFF360BTO	ENCFF452SPE	AFF1	FOXJ2	20613	15441	3469	1273	0	0
K562	ENCFF360BTO	ENCFF699ZII	AFF1	FOXM1	20613	18535	6244	1528	0	0
K562	ENCFF360BTO	ENCFF142CPK	AFF1	FUS	20613	2947	162	242	9.75051e-09	0.00105541
K562	ENCFF360BTO	ENCFF833FCO	AFF1	GABPA	20613	15847	3550	1306	0	0
K562	ENCFF360BTO	ENCFF517KRT	AFF1	GABPB1	20613	30655	5708	2527	0	0
K562	ENCFF360BTO	ENCFF632NQI	AFF1	GATA1	20613	14605	3793	1204	0	0
K562	ENCFF360BTO	ENCFF732HOE	AFF1	GATA2	20613	11622	3398	958	0	0
K562	ENCFF360BTO	ENCFF253FZN	AFF1	GATAD2A	20613	15131	4406	1247	0	0
K562	ENCFF360BTO	ENCFF549KOD	AFF1	GATAD2B	20613	13320	3158	1098	0	0
K562	ENCFF360BTO	ENCFF126BCK	AFF1	GMEB1	20613	27813	6879	2293	0	0
K562	ENCFF360BTO	ENCFF167HYX	AFF1	GTF2A2	20613	6423	951	529	1.38269e-61	1.49664e-56
K562	ENCFF360BTO	ENCFF002CWR	AFF1	GTF2B	20613	2928	940	241	1.10151e-254	1.19228e-249
K562	ENCFF360BTO	ENCFF778RMG	AFF1	GTF2E2	20613	16371	3085	1349	0	0
K562	ENCFF360BTO	ENCFF002CYL	AFF1	GTF3C2	20613	1858	446	153	1.96551e-82	2.12749e-77
K562	ENCFF360BTO	ENCFF474NLG	AFF1	HCFC1	20613	13559	2966	1117	0	0
K562	ENCFF360BTO	ENCFF580DYE	AFF1	HDAC3	20613	10781	4468	888	0	0
K562	ENCFF360BTO	ENCFF998HOR	AFF1	HDAC6	20613	1761	255	145	4.47698e-17	4.84593e-12
K562	ENCFF360BTO	ENCFF939ZFS	AFF1	HDAC8	20613	9908	1721	816	1.81715e-167	1.9669e-162
K562	ENCFF360BTO	ENCFF676NPW	AFF1	HES1	20613	11091	4599	914	0	0
K562	ENCFF360BTO	ENCFF265LKN	AFF1	HINFP	20613	8293	1561	683	8.78066e-182	9.50428e-177
K562	ENCFF360BTO	ENCFF396NSO	AFF1	HLTF	20613	12623	4303	1040	0	0
K562	ENCFF360BTO	ENCFF558DSF	AFF1	HMBOX1	20613	28923	4634	2384	0	0
K562	ENCFF360BTO	ENCFF002CWT	AFF1	HMGN3	20613	14587	2607	1202	3.21997e-269	3.48533e-264
K562	ENCFF360BTO	ENCFF292JRY	AFF1	HNRNPH1	20613	315	31	25	0.0366232	1
K562	ENCFF360BTO	ENCFF777CWV	AFF1	HNRNPK	20613	11589	308	955	5.43757e-132	5.88568e-127
K562	ENCFF360BTO	ENCFF010STZ	AFF1	HNRNPL	20613	8012	684	660	0.00991003	1
K562	ENCFF360BTO	ENCFF122QSN	AFF1	HNRNPLL	20613	15382	2278	1268	9.07465e-144	9.8225e-139
K562	ENCFF360BTO	ENCFF768TJI	AFF1	HNRNPUL1	20613	1122	262	92	1.3777e-47	1.49124e-42
K562	ENCFF360BTO	ENCFF835YLR	AFF1	ID3	20613	24733	5040	2039	0	0
K562	ENCFF360BTO	ENCFF415YPX	AFF1	ILF3	20613	4762	1026	392	5.15603e-156	5.58094e-151
K562	ENCFF360BTO	ENCFF176NOI	AFF1	ILK	20613	2284	313	188	2.21749e-17	2.40023e-12
K562	ENCFF360BTO	ENCFF388AJH	AFF1	IRF1	20613	17589	1558	1450	0.000199371	1
K562	ENCFF360BTO	ENCFF284VUQ	AFF1	IRF1_0	20613	14592	2678	1203	5.57171e-293	6.03087e-288
K562	ENCFF360BTO	ENCFF909LKK	AFF1	IRF1_1	20613	12543	2879	1034	0	0
K562	ENCFF360BTO	ENCFF908UIY	AFF1	IRF1_2	20613	13478	3411	1111	0	0
K562	ENCFF360BTO	ENCFF730RUF	AFF1	IRF1_3	20613	1479	366	121	6.11768e-72	6.62184e-67
K562	ENCFF360BTO	ENCFF384YDT	AFF1	IRF2	20613	8509	2214	701	0	0
K562	ENCFF360BTO	ENCFF196DHR	AFF1	IRF9	20613	9536	2149	786	0	0
K562	ENCFF360BTO	ENCFF629BFI	AFF1	JUN	20613	21668	5157	1786	0	0
K562	ENCFF360BTO	ENCFF417QAJ	AFF1	JUN_0	20613	8729	2929	719	0	0
K562	ENCFF360BTO	ENCFF573GQX	AFF1	JUN_1	20613	4909	1914	404	0	0
K562	ENCFF360BTO	ENCFF192BTP	AFF1	JUN_2	20613	6180	2098	509	0	0
K562	ENCFF360BTO	ENCFF077UYM	AFF1	JUN_3	20613	9310	2776	767	0	0
K562	ENCFF360BTO	ENCFF426DUB	AFF1	JUNB	20613	5347	1797	440	0	0
K562	ENCFF360BTO	ENCFF337DKJ	AFF1	JUND	20613	47775	8048	3939	0	0
K562	ENCFF360BTO	ENCFF772QPO	AFF1	KAT8	20613	2268	724	187	5.6199e-195	6.08304e-190
K562	ENCFF360BTO	ENCFF838COI_ENCFF738WCE	AFF1	KDM1A	20613	26253	4433	2164	0	0
K562	ENCFF360BTO	ENCFF042RAK	AFF1	KDM4B	20613	8167	1952	673	0	0
K562	ENCFF360BTO	ENCFF368TYM	AFF1	KDM5B	20613	22700	3722	1871	0	0
K562	ENCFF360BTO	ENCFF962VSZ	AFF1	KHSRP	20613	5187	2297	427	0	0
K562	ENCFF360BTO	ENCFF717TWA	AFF1	KLF1	20613	11788	2220	971	1.2151e-257	1.31524e-252
K562	ENCFF360BTO	ENCFF802XZN	AFF1	KLF13	20613	11910	2528	982	0	0
K562	ENCFF360BTO	ENCFF844HBQ	AFF1	KLF16	20613	17908	4326	1476	0	0
K562	ENCFF360BTO	ENCFF314ULQ	AFF1	L3MBTL2	20613	53984	7916	4451	0	0
K562	ENCFF360BTO	ENCFF511OXK	AFF1	LARP7	20613	9680	2728	798	0	0
K562	ENCFF360BTO	ENCFF659WAF	AFF1	LEF1	20613	21936	8052	1808	0	0
K562	ENCFF360BTO	ENCFF308IXJ	AFF1	MAFF	20613	27637	2592	2278	7.94099e-12	8.59541e-07
K562	ENCFF360BTO	ENCFF927JBT	AFF1	MAFG	20613	46186	3362	3808	1.05651e-14	1.14358e-09
K562	ENCFF360BTO	ENCFF812QPN	AFF1	MAFK	20613	26965	3229	2223	1.71168e-89	1.85273e-84
K562	ENCFF360BTO	ENCFF799HIG_ENCFF422NGZ	AFF1	MAX	20613	28672	5340	2364	0	0
K562	ENCFF360BTO	ENCFF470MLY	AFF1	MBD2	20613	15555	4566	1282	0	0
K562	ENCFF360BTO	ENCFF226CZE	AFF1	MCM2	20613	4703	591	387	1.38073e-22	1.49452e-17
K562	ENCFF360BTO	ENCFF679ITJ	AFF1	MCM3	20613	2788	174	229	2.23891e-05	1
K562	ENCFF360BTO	ENCFF920RYJ	AFF1	MCM5	20613	1736	104	143	0.000109154	1
K562	ENCFF360BTO	ENCFF577UJR	AFF1	MEF2A	20613	1348	432	111	5.52283e-118	5.97796e-113
K562	ENCFF360BTO	ENCFF257RYT	AFF1	MEF2D	20613	14762	4376	1217	0	0
K562	ENCFF360BTO	ENCFF613RNG	AFF1	MEIS2	20613	53002	6117	4370	9.75348e-138	1.05573e-132
K562	ENCFF360BTO	ENCFF670ZCR	AFF1	MGA	20613	33894	4550	2794	5.90582e-204	6.39251e-199
K562	ENCFF360BTO	ENCFF365NKO	AFF1	MIER1	20613	9498	3279	783	0	0
K562	ENCFF360BTO	ENCFF497XOD	AFF1	MITF	20613	34801	3581	2869	1.92836e-38	2.08728e-33
K562	ENCFF360BTO	ENCFF973OME_ENCFF059ONJ	AFF1	MNT	20613	17605	4676	1451	0	0
K562	ENCFF360BTO	ENCFF769GYG	AFF1	MTA1	20613	17990	6921	1483	0	0
K562	ENCFF360BTO	ENCFF350YXB	AFF1	MTA3	20613	28818	7527	2376	0	0
K562	ENCFF360BTO	ENCFF970LCB	AFF1	MXI1	20613	9033	2324	744	0	0
K562	ENCFF360BTO	ENCFF877ANE	AFF1	MYBL2	20613	4580	1171	377	3.251e-234	3.51891e-229
K562	ENCFF360BTO	ENCFF465JKF	AFF1	MYC	20613	31436	6499	2591	0	0
K562	ENCFF360BTO	ENCFF099SDW	AFF1	MYC_0	20613	21468	5160	1770	0	0
K562	ENCFF360BTO	ENCFF634AYU	AFF1	MYC_1	20613	8915	2677	735	0	0
K562	ENCFF360BTO	ENCFF676YJE	AFF1	MYC_2	20613	37659	6953	3105	0	0
K562	ENCFF360BTO	ENCFF387LTN	AFF1	MYC_3	20613	12479	3482	1028	0	0
K562	ENCFF360BTO	ENCFF583DZD	AFF1	MYNN	20613	15422	4053	1271	0	0
K562	ENCFF360BTO	ENCFF074EZL	AFF1	NBN	20613	20957	8846	1727	0	0
K562	ENCFF360BTO	ENCFF495CSO	AFF1	NCOA4	20613	3079	1174	253	0	0
K562	ENCFF360BTO	ENCFF322DSX	AFF1	NCOA6	20613	4645	1177	382	1.30102e-232	1.40824e-227
K562	ENCFF360BTO	ENCFF165BCW_ENCFF366UBB	AFF1	NCOR1	20613	17482	5635	1441	0	0
K562	ENCFF360BTO	ENCFF002CXG	AFF1	NELFE	20613	458	151	37	6.21862e-45	6.7311e-40
K562	ENCFF360BTO	ENCFF581YKY	AFF1	NEUROD1	20613	14353	4618	1183	0	0
K562	ENCFF360BTO	ENCFF495MHZ	AFF1	NFE2	20613	30144	4587	2485	0	0
K562	ENCFF360BTO	ENCFF175IUO	AFF1	NFE2L1	20613	7430	725	612	7.86491e-07	0.0851306
K562	ENCFF360BTO	ENCFF370ENX	AFF1	NFIC	20613	48576	6178	4005	2.80162e-222	3.03251e-217
K562	ENCFF360BTO	ENCFF157UUF	AFF1	NFRKB	20613	22856	5773	1884	0	0
K562	ENCFF360BTO	ENCFF986MHU	AFF1	NFXL1	20613	6160	809	507	1.33324e-35	1.44312e-30
K562	ENCFF360BTO	ENCFF012VES	AFF1	NFYA	20613	4382	516	361	3.21092e-15	3.47554e-10
K562	ENCFF360BTO	ENCFF113PMT	AFF1	NFYB	20613	8952	565	738	4.3286e-12	4.68532e-07
K562	ENCFF360BTO	ENCFF906PGD	AFF1	NKRF	20613	18069	4741	1489	0	0
K562	ENCFF360BTO	ENCFF776YPS	AFF1	NONO	20613	12558	3056	1035	0	0
K562	ENCFF360BTO	ENCFF954NAJ	AFF1	NR0B1	20613	405	12	33	1.62223e-05	1
K562	ENCFF360BTO	ENCFF664ZGR	AFF1	NR2C1	20613	15500	3727	1278	0	0
K562	ENCFF360BTO	ENCFF594LCH	AFF1	NR2C2	20613	634	121	52	1.39609e-16	1.51114e-11
K562	ENCFF360BTO	ENCFF175IIE	AFF1	NR2F1	20613	37884	6994	3123	0	0
K562	ENCFF360BTO	ENCFF255EOB	AFF1	NR2F2	20613	21050	5256	1735	0	0
K562	ENCFF360BTO	ENCFF712AXK	AFF1	NR2F6	20613	23333	4576	1923	0	0
K562	ENCFF360BTO	ENCFF859NPS	AFF1	NR4A1	20613	20688	4286	1705	0	0
K562	ENCFF360BTO	ENCFF144PPR_ENCFF493ABN	AFF1	NRF1	20613	17306	2104	1426	9.33863e-64	1.01082e-58
K562	ENCFF360BTO	ENCFF289BUU	AFF1	NUFIP1	20613	3572	1295	294	0	0
K562	ENCFF360BTO	ENCFF168HAG	AFF1	PBX2	20613	36719	4551	3027	4.78584e-147	5.18024e-142
K562	ENCFF360BTO	ENCFF941RVL	AFF1	PCBP1	20613	10920	764	900	2.83934e-07	0.0307333
K562	ENCFF360BTO	ENCFF881XQF	AFF1	PCBP2	20613	2539	81	209	2.5182e-24	2.72572e-19
K562	ENCFF360BTO	ENCFF462FRU	AFF1	PHB2	20613	7367	3079	607	0	0
K562	ENCFF360BTO	ENCFF948YVM	AFF1	PHF20	20613	15696	3327	1294	0	0
K562	ENCFF360BTO	ENCFF134CUM	AFF1	PHF21A	20613	8976	2607	740	0	0
K562	ENCFF360BTO	ENCFF626KTJ	AFF1	PHF8	20613	29046	4062	2394	3.16561e-211	3.42649e-206
K562	ENCFF360BTO	ENCFF544XKC	AFF1	PKNOX1	20613	52588	6651	4335	1.28501e-233	1.39091e-228
K562	ENCFF360BTO	ENCFF881QBT	AFF1	PML	20613	21322	5959	1758	0	0
K562	ENCFF360BTO	ENCFF662YQK	AFF1	POLR2A_0	20613	19534	3495	1610	0	0
K562	ENCFF360BTO	ENCFF853ZMA	AFF1	POLR2A_1	20613	22578	3587	1861	1.49487e-275	1.61806e-270
K562	ENCFF360BTO	ENCFF206YXX	AFF1	POLR2A_2	20613	19284	3622	1590	0	0
K562	ENCFF360BTO	ENCFF270QAB	AFF1	POLR2A_3	20613	23423	3778	1931	5.54558e-302	6.0026e-297
K562	ENCFF360BTO	ENCFF296CNQ	AFF1	POLR2AphosphoS2	20613	10069	1381	830	9.25597e-69	1.00188e-63
K562	ENCFF360BTO	ENCFF542DOG	AFF1	POLR2AphosphoS5	20613	30324	6135	2500	0	0
K562	ENCFF360BTO	ENCFF872JJJ	AFF1	POLR2B	20613	20684	4542	1705	0	0
K562	ENCFF360BTO	ENCFF273EYJ	AFF1	POLR2G	20613	58571	3304	4829	1.25376e-120	1.35708e-115
K562	ENCFF360BTO	ENCFF801YZV	AFF1	POLR2H	20613	23424	4350	1931	0	0
K562	ENCFF360BTO	ENCFF002CXW	AFF1	POLR3A	20613	1310	322	108	3.30177e-62	3.57387e-57
K562	ENCFF360BTO	ENCFF002CXT	AFF1	POLR3G	20613	207	137	17	3.07899e-74	3.33273e-69
K562	ENCFF360BTO	ENCFF990CFV	AFF1	POU5F1	20613	2219	570	182	1.32188e-116	1.43081e-111
K562	ENCFF360BTO	ENCFF294HEI	AFF1	PRDM10	20613	29758	4502	2453	2.69424e-300	2.91627e-295
K562	ENCFF360BTO	ENCFF785ACI	AFF1	PRPF4	20613	6788	711	559	8.28314e-11	8.96575e-06
K562	ENCFF360BTO	ENCFF694BIA	AFF1	PTBP1	20613	5027	901	414	2.16367e-95	2.34198e-90
K562	ENCFF360BTO	ENCFF007DKB	AFF1	PTRF	20613	5154	612	424	2.04584e-18	2.21444e-13
K562	ENCFF360BTO	ENCFF332DRG	AFF1	PTTG1	20613	5547	684	457	9.38607e-24	1.01596e-18
K562	ENCFF360BTO	ENCFF421KIV	AFF1	PYGO2	20613	4223	1595	348	0	0
K562	ENCFF360BTO	ENCFF002CXU	AFF1	RAD21	20613	17627	857	1453	6.19346e-65	6.70386e-60
K562	ENCFF360BTO	ENCFF096XMD	AFF1	RAD51	20613	17974	3689	1481	0	0
K562	ENCFF360BTO	ENCFF975IRM	AFF1	RB1	20613	25768	3722	2124	1.14168e-215	1.23577e-210
K562	ENCFF360BTO	ENCFF379MPS	AFF1	RBBP5	20613	24338	3370	2006	9.06195e-170	9.80874e-165
K562	ENCFF360BTO	ENCFF120IDE	AFF1	RBFOX2	20613	56370	4542	4647	0.00179132	1
K562	ENCFF360BTO	ENCFF682SIY	AFF1	RBM14	20613	3099	285	255	0.00431878	1
K562	ENCFF360BTO	ENCFF971VJZ	AFF1	RBM15	20613	400	59	32	5.81302e-06	0.629207
K562	ENCFF360BTO	ENCFF861YKK	AFF1	RBM17	20613	47	4	3	0.168031	1
K562	ENCFF360BTO	ENCFF522JUV	AFF1	RBM22	20613	13050	880	1075	8.62781e-11	9.33883e-06
K562	ENCFF360BTO	ENCFF680WBN	AFF1	RBM25	20613	49721	1044	4099	0	0
K562	ENCFF360BTO	ENCFF782GWS	AFF1	RBM34	20613	1085	27	89	8.79708e-15	9.52205e-10
K562	ENCFF360BTO	ENCFF209JJD	AFF1	RBM39	20613	2747	972	226	1.87291e-294	2.02725e-289
K562	ENCFF360BTO	ENCFF484CKD	AFF1	RCOR1	20613	6822	2503	562	0	0
K562	ENCFF360BTO	ENCFF580QGA	AFF1	RELA	20613	10319	1608	850	9.78667e-119	1.05932e-113
K562	ENCFF360BTO	ENCFF237UAN_ENCFF010UHD	AFF1	RFX1	20613	13929	780	1148	1.80024e-31	1.94859e-26
K562	ENCFF360BTO	ENCFF716LRI	AFF1	RFX5	20613	2725	576	224	6.78894e-86	7.34841e-81
K562	ENCFF360BTO	ENCFF209HKW	AFF1	RLF	20613	10587	3017	872	0	0
K562	ENCFF360BTO	ENCFF478MPX	AFF1	SAFB	20613	5923	406	488	1.32217e-05	1
K562	ENCFF360BTO	ENCFF624NUZ	AFF1	SAFB2	20613	82	2	6	0.0446175	1
K562	ENCFF360BTO	ENCFF718NUA	AFF1	SAP30	20613	14058	2183	1159	2.44766e-158	2.64938e-153
K562	ENCFF360BTO	ENCFF294EHN	AFF1	SETDB1	20613	4113	571	339	4.82679e-31	5.22456e-26
K562	ENCFF360BTO	ENCFF757ODD	AFF1	SFPQ	20613	228	19	18	0.0886711	1
K562	ENCFF360BTO	ENCFF191MPD	AFF1	SIN3A	20613	13459	2541	1109	7.28277e-296	7.88294e-291
K562	ENCFF360BTO	ENCFF280GTU	AFF1	SIN3B	20613	10501	1829	865	6.97039e-179	7.54482e-174
K562	ENCFF360BTO	ENCFF002CXZ	AFF1	SIRT6	20613	2305	1401	190	0	0
K562	ENCFF360BTO	ENCFF033EBX_ENCFF002CMM	AFF1	SIX5	20613	3194	744	263	1.14165e-129	1.23574e-124
K562	ENCFF360BTO	ENCFF481WGW	AFF1	SKIL	20613	24313	6393	2004	0	0
K562	ENCFF360BTO	ENCFF315YAF	AFF1	SMAD1	20613	8855	3156	730	0	0
K562	ENCFF360BTO	ENCFF011KRN	AFF1	SMAD2	20613	200	67	16	1.46345e-21	1.58405e-16
K562	ENCFF360BTO	ENCFF178MOP	AFF1	SMAD5	20613	22325	3677	1840	0	0
K562	ENCFF360BTO	ENCFF995NIE	AFF1	SMARCA5	20613	19278	2709	1589	4.5641e-144	4.94022e-139
K562	ENCFF360BTO	ENCFF944GJH	AFF1	SMARCB1	20613	3079	832	253	2.82472e-181	3.05751e-176
K562	ENCFF360BTO	ENCFF114PTZ	AFF1	SMARCC2	20613	19106	6303	1575	0	0
K562	ENCFF360BTO	ENCFF622RBW	AFF1	SMARCE1	20613	36356	9364	2997	0	0
K562	ENCFF360BTO	ENCFF041YQC	AFF1	SMC3	20613	26872	1900	2215	5.45756e-13	5.90732e-08
K562	ENCFF360BTO	ENCFF494ZUY	AFF1	SNIP1	20613	3268	1125	269	0	0
K562	ENCFF360BTO	ENCFF033KXY	AFF1	SNRNP70	20613	882	117	72	2.75369e-07	0.0298063
K562	ENCFF360BTO	ENCFF241TBP	AFF1	SOX6	20613	37311	8827	3076	0	0
K562	ENCFF360BTO	ENCFF300XUA	AFF1	SP1	20613	14898	2170	1228	3.02621e-130	3.2756e-125
K562	ENCFF360BTO	ENCFF002CMJ	AFF1	SPI1	20613	28677	2899	2364	2.31082e-27	2.50126e-22
K562	ENCFF360BTO	ENCFF985TSH	AFF1	SREBF1	20613	2865	914	236	1.28471e-245	1.39058e-240
K562	ENCFF360BTO	ENCFF798URE	AFF1	SRSF1	20613	1170	205	96	1.73387e-22	1.87676e-17
K562	ENCFF360BTO	ENCFF722XRW	AFF1	SRSF3	20613	1984	299	163	4.41989e-22	4.78413e-17
K562	ENCFF360BTO	ENCFF059WVE	AFF1	SRSF7	20613	208	6	17	0.00138789	1
K562	ENCFF360BTO	ENCFF137IBM	AFF1	SRSF9	20613	29	0	2	0.135335	1
K562	ENCFF360BTO	ENCFF290HTJ	AFF1	STAT1_0	20613	1337	621	110	2.10746e-247	2.28114e-242
K562	ENCFF360BTO	ENCFF254MPF	AFF1	STAT1_1	20613	1283	499	105	3.84681e-169	4.16383e-164
K562	ENCFF360BTO	ENCFF498DOQ	AFF1	STAT1_2	20613	957	259	78	1.02161e-58	1.1058e-53
K562	ENCFF360BTO	ENCFF648NYF	AFF1	STAT1_3	20613	2831	912	233	3.31233e-248	3.5853e-243
K562	ENCFF360BTO	ENCFF841YFF	AFF1	STAT2_0	20613	2097	764	172	3.32703e-240	3.60121e-235
K562	ENCFF360BTO	ENCFF714VIT	AFF1	STAT2_1	20613	3606	1743	297	0	0
K562	ENCFF360BTO	ENCFF696KPD	AFF1	STAT5A	20613	13378	4364	1103	0	0
K562	ENCFF360BTO	ENCFF484HCG	AFF1	SUPT5H	20613	29659	4706	2445	0	0
K562	ENCFF360BTO	ENCFF822FWM	AFF1	TAF1	20613	19025	4165	1568	0	0
K562	ENCFF360BTO	ENCFF617CAZ	AFF1	TAF15	20613	787	115	64	2.8165e-09	0.000304861
K562	ENCFF360BTO	ENCFF034CQR	AFF1	TAF7	20613	648	236	53	6.48729e-76	7.02191e-71
K562	ENCFF360BTO	ENCFF785HXY	AFF1	TAF9B	20613	15392	5372	1269	0	0
K562	ENCFF360BTO	ENCFF284LRP_ENCFF482CEV	AFF1	TAL1	20613	19046	3936	1570	0	0
K562	ENCFF360BTO	ENCFF626MVT	AFF1	TBL1XR1	20613	15770	5511	1300	0	0
K562	ENCFF360BTO	ENCFF380FJL	AFF1	TBP	20613	21570	4415	1778	0	0
K562	ENCFF360BTO	ENCFF249EZR	AFF1	TCF7	20613	5844	1971	481	0	0
K562	ENCFF360BTO	ENCFF312RFN	AFF1	TCF7L2	20613	2119	654	174	3.85281e-170	4.17033e-165
K562	ENCFF360BTO	ENCFF619BDC	AFF1	TEAD2	20613	6623	1548	546	3.78305e-268	4.09482e-263
K562	ENCFF360BTO	ENCFF209MQX	AFF1	TEAD4	20613	35771	7488	2949	0	0
K562	ENCFF360BTO	ENCFF701MXF	AFF1	TFDP1	20613	22661	3646	1868	1.12745e-289	1.22036e-284
K562	ENCFF360BTO	ENCFF641LJY	AFF1	THAP1	20613	5972	958	492	1.76128e-77	1.90643e-72
K562	ENCFF360BTO	ENCFF671BFH	AFF1	THRA	20613	1757	277	144	2.75562e-23	2.98271e-18
K562	ENCFF360BTO	ENCFF294VWT	AFF1	THRAP3	20613	4904	809	404	1.17038e-70	1.26683e-65
K562	ENCFF360BTO	ENCFF262BVP	AFF1	TOE1	20613	19775	6151	1630	0	0
K562	ENCFF360BTO	ENCFF049CRW_ENCFF646VQW	AFF1	TRIM24	20613	15621	5212	1287	0	0
K562	ENCFF360BTO	ENCFF561IZB	AFF1	TRIP13	20613	2520	812	207	7.99234e-222	8.65099e-217
K562	ENCFF360BTO	ENCFF036YVI	AFF1	TSC22D4	20613	3352	156	276	1.10448e-15	1.1955e-10
K562	ENCFF360BTO	ENCFF730URE	AFF1	U2AF1	20613	4352	309	358	0.000673084	1
K562	ENCFF360BTO	ENCFF398EQF	AFF1	U2AF2	20613	137	0	11	1.67017e-05	1
K562	ENCFF360BTO	ENCFF671DOL	AFF1	UBTF	20613	19212	3018	1584	5.10267e-225	5.52319e-220
K562	ENCFF360BTO	ENCFF334FMW	AFF1	USF1	20613	21340	2748	1759	9.35811e-106	1.01293e-100
K562	ENCFF360BTO	ENCFF150VTD	AFF1	USF2	20613	3664	657	302	3.89697e-70	4.21812e-65
K562	ENCFF360BTO	ENCFF186QUP	AFF1	VEZF1	20613	46383	6659	3824	0	0
K562	ENCFF360BTO	ENCFF803LEC	AFF1	XRCC3	20613	1986	173	163	0.0224441	1
K562	ENCFF360BTO	ENCFF998KKJ	AFF1	XRCC5	20613	13253	2941	1092	0	0
K562	ENCFF360BTO	ENCFF706LIT	AFF1	YBX1	20613	1358	225	111	7.77737e-22	8.4183e-17
K562	ENCFF360BTO	ENCFF246HIU	AFF1	YBX3	20613	2680	742	220	1.27441e-167	1.37944e-162
K562	ENCFF360BTO	ENCFF926FUM_ENCFF328XKC	AFF1	YY1	20613	12127	2186	999	1.03165e-230	1.11667e-225
K562	ENCFF360BTO	ENCFF253FON	AFF1	ZBED1	20613	5913	2115	487	0	0
K562	ENCFF360BTO	ENCFF434QZL	AFF1	ZBTB11	20613	7250	1719	597	5.27598e-305	5.71077e-300
K562	ENCFF360BTO	ENCFF561USY	AFF1	ZBTB2	20613	18423	5550	1519	0	0
K562	ENCFF360BTO	ENCFF408FQC	AFF1	ZBTB33	20613	60931	1499	5023	0	0
K562	ENCFF360BTO	ENCFF417LEJ	AFF1	ZBTB40	20613	29759	5087	2453	0	0
K562	ENCFF360BTO	ENCFF706ISJ	AFF1	ZBTB7A	20613	30583	3045	2521	4.95917e-25	5.36785e-20
K562	ENCFF360BTO	ENCFF589EVD	AFF1	ZBTB8A	20613	955	259	78	1.02161e-58	1.1058e-53
K562	ENCFF360BTO	ENCFF522JRK	AFF1	ZC3H11A	20613	2624	782	216	1.04734e-193	1.13366e-188
K562	ENCFF360BTO	ENCFF809OEX	AFF1	ZC3H8	20613	12691	5462	1046	0	0
K562	ENCFF360BTO	ENCFF521CRG	AFF1	ZFP36	20613	23635	2052	1948	0.000575473	1
K562	ENCFF360BTO	ENCFF396DNK	AFF1	ZFP91	20613	14258	2200	1175	6.83809e-157	7.40162e-152
K562	ENCFF360BTO	ENCFF433RKB	AFF1	ZFX	20613	27044	3093	2229	1.11043e-67	1.20194e-62
K562	ENCFF360BTO	ENCFF195ODE	AFF1	ZHX1	20613	3453	1020	284	2.23792e-249	2.42235e-244
K562	ENCFF360BTO	ENCFF163VUK	AFF1	ZKSCAN1	20613	14153	2657	1166	1.07513e-305	1.16373e-300
K562	ENCFF360BTO	ENCFF529FWJ	AFF1	ZKSCAN8	20613	11311	2409	932	0	0
K562	ENCFF360BTO	ENCFF597DIY	AFF1	ZMIZ1	20613	1049	236	86	1.23844e-40	1.3405e-35
K562	ENCFF360BTO	ENCFF511QHY	AFF1	ZMYM3	20613	39230	1177	3234	0	0
K562	ENCFF360BTO	ENCFF114IWY	AFF1	ZNF143	20613	29873	3507	2463	1.0182e-87	1.10211e-82
K562	ENCFF360BTO	ENCFF116DIO	AFF1	ZNF148	20613	22956	3848	1892	0	0
K562	ENCFF360BTO	ENCFF721LDD	AFF1	ZNF175	20613	18917	4087	1559	0	0
K562	ENCFF360BTO	ENCFF853TZC	AFF1	ZNF197	20613	10450	3033	861	0	0
K562	ENCFF360BTO	ENCFF891MVM	AFF1	ZNF263	20613	3994	356	329	0.00718745	1
K562	ENCFF360BTO	ENCFF344QKL	AFF1	ZNF274	20613	3064	801	252	1.94494e-166	2.10523e-161
K562	ENCFF360BTO	ENCFF386WKY	AFF1	ZNF280A	20613	6438	483	530	0.00211739	1
K562	ENCFF360BTO	ENCFF581ZZT	AFF1	ZNF282	20613	12961	3869	1068	0	0
K562	ENCFF360BTO	ENCFF921WMN	AFF1	ZNF318	20613	10963	5021	903	0	0
K562	ENCFF360BTO	ENCFF744SVC	AFF1	ZNF354B	20613	4779	328	394	6.2455e-05	1
K562	ENCFF360BTO	ENCFF706SJZ	AFF1	ZNF384	20613	19825	2776	1634	7.92057e-146	8.57331e-141
K562	ENCFF360BTO	ENCFF388YOB	AFF1	ZNF395	20613	25387	4947	2093	0	0
K562	ENCFF360BTO	ENCFF834WGJ	AFF1	ZNF507	20613	11748	59	968	0	0
K562	ENCFF360BTO	ENCFF447QUG	AFF1	ZNF512	20613	23246	602	1916	1.71044e-270	1.8514e-265
K562	ENCFF360BTO	ENCFF815TTY	AFF1	ZNF584	20613	15035	3283	1239	0	0
K562	ENCFF360BTO	ENCFF602AXP	AFF1	ZNF589	20613	21343	4537	1759	0	0
K562	ENCFF360BTO	ENCFF273TYA	AFF1	ZNF592	20613	35259	5645	2907	0	0
K562	ENCFF360BTO	ENCFF173NRW	AFF1	ZNF644	20613	12705	3555	1047	0	0
K562	ENCFF360BTO	ENCFF248AOD	AFF1	ZNF766	20613	26482	5772	2183	0	0
K562	ENCFF360BTO	ENCFF654BMD	AFF1	ZNF83	20613	11272	3169	929	0	0
K562	ENCFF360BTO	ENCFF996IVU	AFF1	ZNF830	20613	3460	778	285	8.90693e-128	9.64095e-123
K562	ENCFF360BTO	ENCFF253NXR	AFF1	ZSCAN29	20613	17315	4745	1427	0	0
K562	ENCFF360BTO	ENCFF588OLK	AFF1	ZZZ3	20613	3029	983	249	4.57716e-270	4.95437e-265
K562	ENCFF010MMQ	ENCFF836VRV	ARHGAP35	2001-08-01	5027	11428	170	229	7.20798e-06	0.780199
K562	ENCFF010MMQ	ENCFF396GUH	ARHGAP35	ADNP	5027	21217	295	426	3.56153e-12	3.85503e-07
K562	ENCFF010MMQ	ENCFF360BTO	ARHGAP35	AFF1	5027	20613	975	414	1.10004e-121	1.19069e-116
K562	ENCFF010MMQ	ENCFF010MMQ	ARHGAP35	ARHGAP35	5027	5027	5027	101	0	0
K562	ENCFF010MMQ	ENCFF225MPC	ARHGAP35	ARID1B	5027	50204	911	1009	9.63525e-05	1
K562	ENCFF010MMQ	ENCFF332ICQ	ARHGAP35	ARID2	5027	11835	1129	237	0	0
K562	ENCFF010MMQ	ENCFF835KAT	ARHGAP35	ARID3A	5027	11550	173	232	8.04913e-06	0.871246
K562	ENCFF010MMQ	ENCFF235ZZP	ARHGAP35	ASH1L	5027	8152	964	163	0	0
K562	ENCFF010MMQ	ENCFF002CVM	ARHGAP35	ATF1	5027	14864	257	298	0.00128972	1
K562	ENCFF010MMQ	ENCFF968KBN	ARHGAP35	ATF2	5027	46506	454	935	6.63393e-69	7.18063e-64
K562	ENCFF010MMQ	ENCFF958KNK	ARHGAP35	ATF3	5027	59815	369	1202	6.33891e-175	6.8613e-170
K562	ENCFF010MMQ	ENCFF710IEF	ARHGAP35	ATF4	5027	42275	642	850	1.29806e-14	1.40504e-09
K562	ENCFF010MMQ	ENCFF868QLL	ARHGAP35	ATF7	5027	47113	810	947	4.15812e-07	0.0450079
K562	ENCFF010MMQ	ENCFF423EMU	ARHGAP35	BACH1	5027	4708	87	94	0.0327055	1
K562	ENCFF010MMQ	ENCFF057ZUY	ARHGAP35	BCOR	5027	44533	1458	895	3.35981e-67	3.6367e-62
K562	ENCFF010MMQ	ENCFF002CVP	ARHGAP35	BDP1	5027	570	4	11	0.0101887	1
K562	ENCFF010MMQ	ENCFF179NDS	ARHGAP35	BHLHE40	5027	27327	464	549	1.77733e-05	1
K562	ENCFF010MMQ	ENCFF048OIZ	ARHGAP35	BMI1	5027	2818	74	56	0.00335639	1
K562	ENCFF010MMQ	ENCFF549GMO	ARHGAP35	BRCA1	5027	951	18	19	0.0911231	1
K562	ENCFF010MMQ	ENCFF714XHL	ARHGAP35	BRD4	5027	8192	283	164	1.00272e-17	1.08536e-12
K562	ENCFF010MMQ	ENCFF666LZV	ARHGAP35	BRD9	5027	18855	1093	379	2.5624e-195	2.77356e-190
K562	ENCFF010MMQ	ENCFF002CVR	ARHGAP35	BRF1	5027	221	1	4	0.0732626	1
K562	ENCFF010MMQ	ENCFF002CVS	ARHGAP35	BRF2	5027	1087	23	21	0.0755728	1
K562	ENCFF010MMQ	ENCFF996ZGL	ARHGAP35	C11orf30	5027	61206	480	1230	4.98898e-132	5.40013e-127
K562	ENCFF010MMQ	ENCFF642BNC	ARHGAP35	CBFA2T2	5027	32296	329	649	2.74804e-44	2.9745e-39
K562	ENCFF010MMQ	ENCFF993GXU	ARHGAP35	CBFA2T3	5027	53515	568	1076	1.59071e-65	1.7218e-60
K562	ENCFF010MMQ	ENCFF484DKT	ARHGAP35	CBX1	5027	14582	527	293	3.23509e-35	3.5017e-30
K562	ENCFF010MMQ	ENCFF455TDM	ARHGAP35	CBX3	5027	26746	589	537	0.00143235	1
K562	ENCFF010MMQ	ENCFF062ARS	ARHGAP35	CBX5	5027	7083	135	142	0.0287926	1
K562	ENCFF010MMQ	ENCFF456PQY	ARHGAP35	CBX8	5027	4702	7	94	1.931e-31	2.09014e-26
K562	ENCFF010MMQ	ENCFF874QUM	ARHGAP35	CC2D1A	5027	26447	1127	531	3.7818e-112	4.09346e-107
K562	ENCFF010MMQ	ENCFF583GKE	ARHGAP35	CCAR2	5027	543	41	10	1.35715e-13	1.46899e-08
K562	ENCFF010MMQ	ENCFF002CVU	ARHGAP35	CCNT2	5027	20057	361	403	0.00217125	1
K562	ENCFF010MMQ	ENCFF643TEZ	ARHGAP35	CDC5L	5027	5690	1071	114	0	0
K562	ENCFF010MMQ	ENCFF813LOW_ENCFF429XKT	ARHGAP35	CEBPB	5027	19338	188	388	5.80004e-30	6.27802e-25
K562	ENCFF010MMQ	ENCFF925MHB	ARHGAP35	CEBPZ	5027	1303	50	26	9.41751e-06	1
K562	ENCFF010MMQ	ENCFF859FVX	ARHGAP35	CHAMP1	5027	14318	352	287	2.22888e-05	1
K562	ENCFF010MMQ	ENCFF684MLP	ARHGAP35	COPS2	5027	123	1	2	0.270671	1
K562	ENCFF010MMQ	ENCFF665FHC	ARHGAP35	CREB3	5027	14139	222	284	1.76858e-05	1
K562	ENCFF010MMQ	ENCFF582YPB	ARHGAP35	CREB3L1	5027	22194	835	446	4.64491e-61	5.02769e-56
K562	ENCFF010MMQ	ENCFF948TXN	ARHGAP35	CREM	5027	38796	663	780	1.48901e-06	0.161172
K562	ENCFF010MMQ	ENCFF117EWO	ARHGAP35	CSDE1	5027	5866	356	117	1.20069e-70	1.29964e-65
K562	ENCFF010MMQ	ENCFF152VMJ	ARHGAP35	CTBP1	5027	48724	923	979	0.00256468	1
K562	ENCFF010MMQ	ENCFF002DDJ_ENCFF002DBD	ARHGAP35	CTCF	5027	40743	148	819	1.17821e-183	1.2753e-178
K562	ENCFF010MMQ	ENCFF962FQM	ARHGAP35	CTCFL	5027	12832	123	258	3.13909e-21	3.39778e-16
K562	ENCFF010MMQ	ENCFF517YCC	ARHGAP35	CUX1	5027	6367	123	128	0.0325603	1
K562	ENCFF010MMQ	ENCFF526HLP	ARHGAP35	DACH1	5027	19460	307	391	1.32822e-06	0.143768
K562	ENCFF010MMQ	ENCFF338HQY	ARHGAP35	DDX20	5027	10079	583	202	2.08589e-105	2.25779e-100
K562	ENCFF010MMQ	ENCFF786WZD	ARHGAP35	DEAF1	5027	3565	143	71	2.03743e-14	2.20533e-09
K562	ENCFF010MMQ	ENCFF408SNO	ARHGAP35	DIDO1	5027	7905	458	158	7.36715e-84	7.97428e-79
K562	ENCFF010MMQ	ENCFF034PQD	ARHGAP35	DNMT1	5027	3604	670	72	0	0
K562	ENCFF010MMQ	ENCFF774QKS_ENCFF823SYE	ARHGAP35	DPF2	5027	20210	669	406	2.00187e-33	2.16684e-28
K562	ENCFF010MMQ	ENCFF106DAY	ARHGAP35	E2F1	5027	23520	374	472	3.5797e-07	0.038747
K562	ENCFF010MMQ	ENCFF225TLP	ARHGAP35	E2F4	5027	10400	314	209	2.77508e-12	3.00377e-07
K562	ENCFF010MMQ	ENCFF356ASJ	ARHGAP35	E2F5	5027	19472	364	391	0.00804906	1
K562	ENCFF010MMQ	ENCFF417DTI_ENCFF917COW	ARHGAP35	E2F6	5027	14596	318	293	0.00792545	1
K562	ENCFF010MMQ	ENCFF310AGG	ARHGAP35	E2F7	5027	3169	130	63	5.53383e-14	5.98987e-09
K562	ENCFF010MMQ	ENCFF925DJG	ARHGAP35	E2F8	5027	12738	700	256	1.60106e-115	1.733e-110
K562	ENCFF010MMQ	ENCFF083YCQ	ARHGAP35	E4F1	5027	28697	791	577	5.28768e-18	5.72343e-13
K562	ENCFF010MMQ	ENCFF806BDC	ARHGAP35	EHMT2	5027	19437	1383	390	0	0
K562	ENCFF010MMQ	ENCFF502KHR	ARHGAP35	ELF4	5027	21065	862	423	1.93431e-78	2.09371e-73
K562	ENCFF010MMQ	ENCFF019PEL	ARHGAP35	ELK1	5027	3967	156	79	7.03363e-15	7.61328e-10
K562	ENCFF010MMQ	ENCFF549TYR	ARHGAP35	EP300	5027	28288	411	568	7.2085e-13	7.80255e-08
K562	ENCFF010MMQ	ENCFF925ANU	ARHGAP35	EP400	5027	33534	871	674	4.94116e-14	5.34837e-09
K562	ENCFF010MMQ	ENCFF213EPU	ARHGAP35	ESRRA	5027	33450	618	672	0.001725	1
K562	ENCFF010MMQ	ENCFF076YZO	ARHGAP35	ETS1	5027	11558	332	232	1.24122e-10	1.3435e-05
K562	ENCFF010MMQ	ENCFF772HOY	ARHGAP35	ETS2	5027	1762	50	35	0.00331147	1
K562	ENCFF010MMQ	ENCFF404YMX	ARHGAP35	ETV1	5027	24198	519	486	0.00585248	1
K562	ENCFF010MMQ	ENCFF545VNY	ARHGAP35	ETV6	5027	6732	213	135	1.34201e-10	1.45261e-05
K562	ENCFF010MMQ	ENCFF820EVZ	ARHGAP35	EWSR1	5027	1795	85	36	1.58967e-12	1.72068e-07
K562	ENCFF010MMQ	ENCFF883WYX	ARHGAP35	FIP1L1	5027	10793	257	217	0.000767222	1
K562	ENCFF010MMQ	ENCFF002CVW	ARHGAP35	FOS	5027	7646	85	153	6.33743e-10	6.85969e-05
K562	ENCFF010MMQ	ENCFF473GCH	ARHGAP35	FOSL1	5027	7973	133	160	0.00307929	1
K562	ENCFF010MMQ	ENCFF809YFY	ARHGAP35	FOXA1	5027	1350	16	27	0.00716555	1
K562	ENCFF010MMQ	ENCFF452SPE	ARHGAP35	FOXJ2	5027	15441	288	310	0.0105619	1
K562	ENCFF010MMQ	ENCFF699ZII	ARHGAP35	FOXM1	5027	18535	521	372	5.40403e-14	5.84937e-09
K562	ENCFF010MMQ	ENCFF142CPK	ARHGAP35	FUS	5027	2947	87	59	0.000130897	1
K562	ENCFF010MMQ	ENCFF833FCO	ARHGAP35	GABPA	5027	15847	341	318	0.00958527	1
K562	ENCFF010MMQ	ENCFF517KRT	ARHGAP35	GABPB1	5027	30655	911	616	2.65932e-29	2.87848e-24
K562	ENCFF010MMQ	ENCFF632NQI	ARHGAP35	GATA1	5027	14605	178	293	1.14632e-13	1.24079e-08
K562	ENCFF010MMQ	ENCFF732HOE	ARHGAP35	GATA2	5027	11622	194	233	0.000897121	1
K562	ENCFF010MMQ	ENCFF253FZN	ARHGAP35	GATAD2A	5027	15131	744	304	1.15433e-100	1.24946e-95
K562	ENCFF010MMQ	ENCFF549KOD	ARHGAP35	GATAD2B	5027	13320	201	267	3.73295e-06	0.404058
K562	ENCFF010MMQ	ENCFF126BCK	ARHGAP35	GMEB1	5027	27813	1287	559	1.27023e-152	1.37491e-147
K562	ENCFF010MMQ	ENCFF167HYX	ARHGAP35	GTF2A2	5027	6423	190	129	1.005e-07	0.0108782
K562	ENCFF010MMQ	ENCFF002CWR	ARHGAP35	GTF2B	5027	2928	231	58	8.11693e-66	8.78585e-61
K562	ENCFF010MMQ	ENCFF778RMG	ARHGAP35	GTF2E2	5027	16371	447	329	1.05082e-10	1.13742e-05
K562	ENCFF010MMQ	ENCFF002CYL	ARHGAP35	GTF3C2	5027	1858	34	37	0.060228	1
K562	ENCFF010MMQ	ENCFF474NLG	ARHGAP35	HCFC1	5027	13559	433	272	5.93022e-20	6.41892e-15
K562	ENCFF010MMQ	ENCFF580DYE	ARHGAP35	HDAC3	5027	10781	388	216	2.02487e-26	2.19174e-21
K562	ENCFF010MMQ	ENCFF998HOR	ARHGAP35	HDAC6	5027	1761	108	35	2.73491e-23	2.9603e-18
K562	ENCFF010MMQ	ENCFF939ZFS	ARHGAP35	HDAC8	5027	9908	239	199	0.000591733	1
K562	ENCFF010MMQ	ENCFF676NPW	ARHGAP35	HES1	5027	11091	418	223	8.26811e-32	8.94949e-27
K562	ENCFF010MMQ	ENCFF265LKN	ARHGAP35	HINFP	5027	8293	381	166	1.63092e-46	1.76532e-41
K562	ENCFF010MMQ	ENCFF396NSO	ARHGAP35	HLTF	5027	12623	1744	253	0	0
K562	ENCFF010MMQ	ENCFF558DSF	ARHGAP35	HMBOX1	5027	28923	475	581	6.04603e-07	0.0654428
K562	ENCFF010MMQ	ENCFF002CWT	ARHGAP35	HMGN3	5027	14587	288	293	0.0225141	1
K562	ENCFF010MMQ	ENCFF292JRY	ARHGAP35	HNRNPH1	5027	315	38	6	1.75979e-18	1.90481e-13
K562	ENCFF010MMQ	ENCFF777CWV	ARHGAP35	HNRNPK	5027	11589	153	233	5.15746e-09	0.000558249
K562	ENCFF010MMQ	ENCFF010STZ	ARHGAP35	HNRNPL	5027	8012	214	161	1.01235e-05	1
K562	ENCFF010MMQ	ENCFF122QSN	ARHGAP35	HNRNPLL	5027	15382	469	309	5.79198e-18	6.2693e-13
K562	ENCFF010MMQ	ENCFF768TJI	ARHGAP35	HNRNPUL1	5027	1122	76	22	1.56394e-19	1.69282e-14
K562	ENCFF010MMQ	ENCFF835YLR	ARHGAP35	ID3	5027	24733	596	497	1.54888e-06	0.167652
K562	ENCFF010MMQ	ENCFF415YPX	ARHGAP35	ILF3	5027	4762	142	95	1.40656e-06	0.152248
K562	ENCFF010MMQ	ENCFF176NOI	ARHGAP35	ILK	5027	2284	48	45	0.0521243	1
K562	ENCFF010MMQ	ENCFF388AJH	ARHGAP35	IRF1	5027	17589	178	353	2.52988e-25	2.73837e-20
K562	ENCFF010MMQ	ENCFF284VUQ	ARHGAP35	IRF1_0	5027	14592	387	293	2.31349e-08	0.00250415
K562	ENCFF010MMQ	ENCFF909LKK	ARHGAP35	IRF1_1	5027	12543	352	252	4.64469e-10	5.02746e-05
K562	ENCFF010MMQ	ENCFF908UIY	ARHGAP35	IRF1_2	5027	13478	402	271	2.21853e-14	2.40136e-09
K562	ENCFF010MMQ	ENCFF730RUF	ARHGAP35	IRF1_3	5027	1479	24	29	0.0513223	1
K562	ENCFF010MMQ	ENCFF384YDT	ARHGAP35	IRF2	5027	8509	234	171	7.96671e-07	0.0862325
K562	ENCFF010MMQ	ENCFF196DHR	ARHGAP35	IRF9	5027	9536	378	191	2.90971e-33	3.14949e-28
K562	ENCFF010MMQ	ENCFF629BFI	ARHGAP35	JUN	5027	21668	341	435	3.68416e-07	0.0398777
K562	ENCFF010MMQ	ENCFF417QAJ	ARHGAP35	JUN_0	5027	8729	133	175	0.000141298	1
K562	ENCFF010MMQ	ENCFF573GQX	ARHGAP35	JUN_1	5027	4909	77	98	0.00399607	1
K562	ENCFF010MMQ	ENCFF192BTP	ARHGAP35	JUN_2	5027	6180	77	124	1.51021e-06	0.163467
K562	ENCFF010MMQ	ENCFF077UYM	ARHGAP35	JUN_3	5027	9310	151	187	0.000792764	1
K562	ENCFF010MMQ	ENCFF426DUB	ARHGAP35	JUNB	5027	5347	110	107	0.0364576	1
K562	ENCFF010MMQ	ENCFF337DKJ	ARHGAP35	JUND	5027	47775	571	960	1.31714e-42	1.42568e-37
K562	ENCFF010MMQ	ENCFF772QPO	ARHGAP35	KAT8	5027	2268	149	45	1.60181e-34	1.73381e-29
K562	ENCFF010MMQ	ENCFF838COI_ENCFF738WCE	ARHGAP35	KDM1A	5027	26253	576	527	0.00182234	1
K562	ENCFF010MMQ	ENCFF042RAK	ARHGAP35	KDM4B	5027	8167	351	164	3.53683e-37	3.8283e-32
K562	ENCFF010MMQ	ENCFF368TYM	ARHGAP35	KDM5B	5027	22700	694	456	9.12837e-26	9.88064e-21
K562	ENCFF010MMQ	ENCFF962VSZ	ARHGAP35	KHSRP	5027	5187	488	104	2.44965e-163	2.65152e-158
K562	ENCFF010MMQ	ENCFF717TWA	ARHGAP35	KLF1	5027	11788	300	237	1.02544e-05	1
K562	ENCFF010MMQ	ENCFF802XZN	ARHGAP35	KLF13	5027	11910	365	239	8.30056e-15	8.98461e-10
K562	ENCFF010MMQ	ENCFF844HBQ	ARHGAP35	KLF16	5027	17908	220	360	4.80692e-16	5.20306e-11
K562	ENCFF010MMQ	ENCFF314ULQ	ARHGAP35	L3MBTL2	5027	53984	811	1085	4.64806e-19	5.03111e-14
K562	ENCFF010MMQ	ENCFF511OXK	ARHGAP35	LARP7	5027	9680	1888	194	0	0
K562	ENCFF010MMQ	ENCFF659WAF	ARHGAP35	LEF1	5027	21936	844	441	1.70418e-65	1.84463e-60
K562	ENCFF010MMQ	ENCFF308IXJ	ARHGAP35	MAFF	5027	27637	419	555	2.38096e-10	2.57717e-05
K562	ENCFF010MMQ	ENCFF927JBT	ARHGAP35	MAFG	5027	46186	230	928	4.17804e-166	4.52235e-161
K562	ENCFF010MMQ	ENCFF812QPN	ARHGAP35	MAFK	5027	26965	198	542	4.43858e-65	4.80436e-60
K562	ENCFF010MMQ	ENCFF799HIG_ENCFF422NGZ	ARHGAP35	MAX	5027	28672	510	576	0.000345378	1
K562	ENCFF010MMQ	ENCFF470MLY	ARHGAP35	MBD2	5027	15555	512	312	9.24768e-26	1.00098e-20
K562	ENCFF010MMQ	ENCFF226CZE	ARHGAP35	MCM2	5027	4703	789	94	0	0
K562	ENCFF010MMQ	ENCFF679ITJ	ARHGAP35	MCM3	5027	2788	321	56	1.03711e-130	1.12258e-125
K562	ENCFF010MMQ	ENCFF920RYJ	ARHGAP35	MCM5	5027	1736	257	34	3.02511e-131	3.27441e-126
K562	ENCFF010MMQ	ENCFF577UJR	ARHGAP35	MEF2A	5027	1348	38	27	0.00885832	1
K562	ENCFF010MMQ	ENCFF257RYT	ARHGAP35	MEF2D	5027	14762	479	296	4.02324e-23	4.35479e-18
K562	ENCFF010MMQ	ENCFF613RNG	ARHGAP35	MEIS2	5027	53002	668	1065	1.23714e-39	1.33909e-34
K562	ENCFF010MMQ	ENCFF670ZCR	ARHGAP35	MGA	5027	33894	596	681	6.41362e-05	1
K562	ENCFF010MMQ	ENCFF365NKO	ARHGAP35	MIER1	5027	9498	937	190	0	0
K562	ENCFF010MMQ	ENCFF497XOD	ARHGAP35	MITF	5027	34801	387	699	1.49833e-38	1.6218e-33
K562	ENCFF010MMQ	ENCFF973OME_ENCFF059ONJ	ARHGAP35	MNT	5027	17605	465	354	2.48134e-09	0.000268583
K562	ENCFF010MMQ	ENCFF769GYG	ARHGAP35	MTA1	5027	17990	1286	361	0	0
K562	ENCFF010MMQ	ENCFF350YXB	ARHGAP35	MTA3	5027	28818	789	579	2.05967e-17	2.22941e-12
K562	ENCFF010MMQ	ENCFF970LCB	ARHGAP35	MXI1	5027	9033	363	181	4.50475e-33	4.87598e-28
K562	ENCFF010MMQ	ENCFF877ANE	ARHGAP35	MYBL2	5027	4580	191	92	7.26875e-20	7.86776e-15
K562	ENCFF010MMQ	ENCFF465JKF	ARHGAP35	MYC	5027	31436	592	632	0.00449748	1
K562	ENCFF010MMQ	ENCFF099SDW	ARHGAP35	MYC_0	5027	21468	536	431	1.21526e-07	0.0131541
K562	ENCFF010MMQ	ENCFF634AYU	ARHGAP35	MYC_1	5027	8915	285	179	6.93273e-14	7.50406e-09
K562	ENCFF010MMQ	ENCFF676YJE	ARHGAP35	MYC_2	5027	37659	717	757	0.00507963	1
K562	ENCFF010MMQ	ENCFF387LTN	ARHGAP35	MYC_3	5027	12479	353	250	1.47097e-10	1.59219e-05
K562	ENCFF010MMQ	ENCFF583DZD	ARHGAP35	MYNN	5027	15422	387	310	2.88714e-06	0.312507
K562	ENCFF010MMQ	ENCFF074EZL	ARHGAP35	NBN	5027	20957	1228	421	4.11858e-223	4.45799e-218
K562	ENCFF010MMQ	ENCFF495CSO	ARHGAP35	NCOA4	5027	3079	911	61	0	0
K562	ENCFF010MMQ	ENCFF322DSX	ARHGAP35	NCOA6	5027	4645	184	93	2.90727e-17	3.14686e-12
K562	ENCFF010MMQ	ENCFF165BCW_ENCFF366UBB	ARHGAP35	NCOR1	5027	17482	477	351	2.75999e-11	2.98744e-06
K562	ENCFF010MMQ	ENCFF002CXG	ARHGAP35	NELFE	5027	458	52	9	6.38722e-23	6.91359e-18
K562	ENCFF010MMQ	ENCFF581YKY	ARHGAP35	NEUROD1	5027	14353	480	288	1.43666e-25	1.55506e-20
K562	ENCFF010MMQ	ENCFF495MHZ	ARHGAP35	NFE2	5027	30144	285	606	2.18145e-48	2.36122e-43
K562	ENCFF010MMQ	ENCFF175IUO	ARHGAP35	NFE2L1	5027	7430	62	149	3.38668e-16	3.66578e-11
K562	ENCFF010MMQ	ENCFF370ENX	ARHGAP35	NFIC	5027	48576	746	976	2.20374e-15	2.38535e-10
K562	ENCFF010MMQ	ENCFF157UUF	ARHGAP35	NFRKB	5027	22856	1119	459	4.3486e-149	4.70696e-144
K562	ENCFF010MMQ	ENCFF986MHU	ARHGAP35	NFXL1	5027	6160	960	123	0	0
K562	ENCFF010MMQ	ENCFF012VES	ARHGAP35	NFYA	5027	4382	66	88	0.00241028	1
K562	ENCFF010MMQ	ENCFF113PMT	ARHGAP35	NFYB	5027	8952	85	180	1.18947e-15	1.28749e-10
K562	ENCFF010MMQ	ENCFF906PGD	ARHGAP35	NKRF	5027	18069	1606	363	0	0
K562	ENCFF010MMQ	ENCFF776YPS	ARHGAP35	NONO	5027	12558	254	252	0.0248264	1
K562	ENCFF010MMQ	ENCFF954NAJ	ARHGAP35	NR0B1	5027	405	33	8	2.44866e-11	2.65045e-06
K562	ENCFF010MMQ	ENCFF664ZGR	ARHGAP35	NR2C1	5027	15500	468	311	2.43639e-17	2.63717e-12
K562	ENCFF010MMQ	ENCFF594LCH	ARHGAP35	NR2C2	5027	634	21	12	0.00553259	1
K562	ENCFF010MMQ	ENCFF175IIE	ARHGAP35	NR2F1	5027	37884	618	761	9.24883e-09	0.0010011
K562	ENCFF010MMQ	ENCFF255EOB	ARHGAP35	NR2F2	5027	21050	422	423	0.0193934	1
K562	ENCFF010MMQ	ENCFF712AXK	ARHGAP35	NR2F6	5027	23333	293	469	6.20803e-19	6.71964e-14
K562	ENCFF010MMQ	ENCFF859NPS	ARHGAP35	NR4A1	5027	20688	454	415	0.00316421	1
K562	ENCFF010MMQ	ENCFF144PPR_ENCFF493ABN	ARHGAP35	NRF1	5027	17306	336	347	0.0182431	1
K562	ENCFF010MMQ	ENCFF289BUU	ARHGAP35	NUFIP1	5027	3572	213	71	3.01675e-42	3.26536e-37
K562	ENCFF010MMQ	ENCFF168HAG	ARHGAP35	PBX2	5027	36719	491	738	7.57216e-23	8.19618e-18
K562	ENCFF010MMQ	ENCFF941RVL	ARHGAP35	PCBP1	5027	10920	226	219	0.0237476	1
K562	ENCFF010MMQ	ENCFF881XQF	ARHGAP35	PCBP2	5027	2539	56	51	0.04198	1
K562	ENCFF010MMQ	ENCFF462FRU	ARHGAP35	PHB2	5027	7367	1134	148	0	0
K562	ENCFF010MMQ	ENCFF948YVM	ARHGAP35	PHF20	5027	15696	921	315	1.45244e-168	1.57213e-163
K562	ENCFF010MMQ	ENCFF134CUM	ARHGAP35	PHF21A	5027	8976	420	180	9.32449e-53	1.00929e-47
K562	ENCFF010MMQ	ENCFF626KTJ	ARHGAP35	PHF8	5027	29046	619	584	0.00573263	1
K562	ENCFF010MMQ	ENCFF544XKC	ARHGAP35	PKNOX1	5027	52588	1056	1057	0.0122698	1
K562	ENCFF010MMQ	ENCFF881QBT	ARHGAP35	PML	5027	21322	670	428	7.66109e-28	8.29244e-23
K562	ENCFF010MMQ	ENCFF662YQK	ARHGAP35	POLR2A_0	5027	19534	592	392	1.21475e-21	1.31485e-16
K562	ENCFF010MMQ	ENCFF853ZMA	ARHGAP35	POLR2A_1	5027	22578	614	453	1.08917e-13	1.17893e-08
K562	ENCFF010MMQ	ENCFF206YXX	ARHGAP35	POLR2A_2	5027	19284	603	387	7.52787e-25	8.14824e-20
K562	ENCFF010MMQ	ENCFF270QAB	ARHGAP35	POLR2A_3	5027	23423	644	470	4.70081e-15	5.0882e-10
K562	ENCFF010MMQ	ENCFF296CNQ	ARHGAP35	POLR2AphosphoS2	5027	10069	324	202	7.02608e-16	7.6051e-11
K562	ENCFF010MMQ	ENCFF542DOG	ARHGAP35	POLR2AphosphoS5	5027	30324	717	609	1.73887e-06	0.188218
K562	ENCFF010MMQ	ENCFF872JJJ	ARHGAP35	POLR2B	5027	20684	1123	415	1.11616e-180	1.20815e-175
K562	ENCFF010MMQ	ENCFF273EYJ	ARHGAP35	POLR2G	5027	58571	714	1177	1.22896e-48	1.33023e-43
K562	ENCFF010MMQ	ENCFF801YZV	ARHGAP35	POLR2H	5027	23424	549	471	3.70927e-05	1
K562	ENCFF010MMQ	ENCFF002CXW	ARHGAP35	POLR3A	5027	1310	19	26	0.0321916	1
K562	ENCFF010MMQ	ENCFF002CXT	ARHGAP35	POLR3G	5027	207	3	4	0.195367	1
K562	ENCFF010MMQ	ENCFF990CFV	ARHGAP35	POU5F1	5027	2219	94	44	2.18383e-11	2.3638e-06
K562	ENCFF010MMQ	ENCFF294HEI	ARHGAP35	PRDM10	5027	29758	504	598	7.21686e-06	0.78116
K562	ENCFF010MMQ	ENCFF785ACI	ARHGAP35	PRPF4	5027	6788	218	136	2.35304e-11	2.54696e-06
K562	ENCFF010MMQ	ENCFF694BIA	ARHGAP35	PTBP1	5027	5027	234	101	6.19447e-30	6.70496e-25
K562	ENCFF010MMQ	ENCFF007DKB	ARHGAP35	PTRF	5027	5154	103	103	0.0392772	1
K562	ENCFF010MMQ	ENCFF332DRG	ARHGAP35	PTTG1	5027	5547	91	111	0.00611965	1
K562	ENCFF010MMQ	ENCFF421KIV	ARHGAP35	PYGO2	5027	4223	595	84	1.76462e-286	1.91004e-281
K562	ENCFF010MMQ	ENCFF002CXU	ARHGAP35	RAD21	5027	17627	69	354	8.08484e-77	8.75111e-72
K562	ENCFF010MMQ	ENCFF096XMD	ARHGAP35	RAD51	5027	17974	409	361	0.000926206	1
K562	ENCFF010MMQ	ENCFF975IRM	ARHGAP35	RB1	5027	25768	448	518	0.000132361	1
K562	ENCFF010MMQ	ENCFF379MPS	ARHGAP35	RBBP5	5027	24338	567	489	4.52432e-05	1
K562	ENCFF010MMQ	ENCFF120IDE	ARHGAP35	RBFOX2	5027	56370	841	1133	1.508e-20	1.63228e-15
K562	ENCFF010MMQ	ENCFF682SIY	ARHGAP35	RBM14	5027	3099	88	62	0.000343485	1
K562	ENCFF010MMQ	ENCFF971VJZ	ARHGAP35	RBM15	5027	400	33	8	2.44866e-11	2.65045e-06
K562	ENCFF010MMQ	ENCFF861YKK	ARHGAP35	RBM17	5027	47	3	0	0	0
K562	ENCFF010MMQ	ENCFF522JUV	ARHGAP35	RBM22	5027	13050	268	262	0.022756	1
K562	ENCFF010MMQ	ENCFF680WBN	ARHGAP35	RBM25	5027	49721	521	999	8.92945e-63	9.66533e-58
K562	ENCFF010MMQ	ENCFF782GWS	ARHGAP35	RBM34	5027	1085	16	21	0.0518448	1
K562	ENCFF010MMQ	ENCFF209JJD	ARHGAP35	RBM39	5027	2747	191	55	1.80366e-46	1.9523e-41
K562	ENCFF010MMQ	ENCFF484CKD	ARHGAP35	RCOR1	5027	6822	183	137	2.74377e-05	1
K562	ENCFF010MMQ	ENCFF580QGA	ARHGAP35	RELA	5027	10319	233	207	0.0054437	1
K562	ENCFF010MMQ	ENCFF237UAN_ENCFF010UHD	ARHGAP35	RFX1	5027	13929	118	280	3.10118e-28	3.35675e-23
K562	ENCFF010MMQ	ENCFF716LRI	ARHGAP35	RFX5	5027	2725	71	54	0.00415328	1
K562	ENCFF010MMQ	ENCFF209HKW	ARHGAP35	RLF	5027	10587	364	212	7.55737e-22	8.18018e-17
K562	ENCFF010MMQ	ENCFF478MPX	ARHGAP35	SAFB	5027	5923	137	119	0.00930684	1
K562	ENCFF010MMQ	ENCFF624NUZ	ARHGAP35	SAFB2	5027	82	1	1	0.367879	1
K562	ENCFF010MMQ	ENCFF718NUA	ARHGAP35	SAP30	5027	14058	363	282	4.9321e-07	0.0533855
K562	ENCFF010MMQ	ENCFF294EHN	ARHGAP35	SETDB1	5027	4113	133	82	5.65855e-08	0.00612487
K562	ENCFF010MMQ	ENCFF757ODD	ARHGAP35	SFPQ	5027	228	31	4	1.02721e-17	1.11186e-12
K562	ENCFF010MMQ	ENCFF191MPD	ARHGAP35	SIN3A	5027	13459	411	270	3.39579e-16	3.67564e-11
K562	ENCFF010MMQ	ENCFF280GTU	ARHGAP35	SIN3B	5027	10501	287	211	1.08439e-07	0.0117375
K562	ENCFF010MMQ	ENCFF002CXZ	ARHGAP35	SIRT6	5027	2305	67	46	0.000733296	1
K562	ENCFF010MMQ	ENCFF033EBX_ENCFF002CMM	ARHGAP35	SIX5	5027	3194	126	64	2.56262e-12	2.7738e-07
K562	ENCFF010MMQ	ENCFF481WGW	ARHGAP35	SKIL	5027	24313	643	488	3.06678e-12	3.31952e-07
K562	ENCFF010MMQ	ENCFF315YAF	ARHGAP35	SMAD1	5027	8855	407	178	3.67686e-49	3.97987e-44
K562	ENCFF010MMQ	ENCFF011KRN	ARHGAP35	SMAD2	5027	200	12	4	0.000641512	1
K562	ENCFF010MMQ	ENCFF178MOP	ARHGAP35	SMAD5	5027	22325	685	448	6.14048e-26	6.64652e-21
K562	ENCFF010MMQ	ENCFF995NIE	ARHGAP35	SMARCA5	5027	19278	1580	387	0	0
K562	ENCFF010MMQ	ENCFF944GJH	ARHGAP35	SMARCB1	5027	3079	53	61	0.0315932	1
K562	ENCFF010MMQ	ENCFF114PTZ	ARHGAP35	SMARCC2	5027	19106	491	384	2.04373e-08	0.00221215
K562	ENCFF010MMQ	ENCFF622RBW	ARHGAP35	SMARCE1	5027	36356	1156	731	3.5792e-48	3.87416e-43
K562	ENCFF010MMQ	ENCFF041YQC	ARHGAP35	SMC3	5027	26872	209	540	7.06175e-60	7.64371e-55
K562	ENCFF010MMQ	ENCFF494ZUY	ARHGAP35	SNIP1	5027	3268	593	65	0	0
K562	ENCFF010MMQ	ENCFF033KXY	ARHGAP35	SNRNP70	5027	882	56	17	4.6802e-14	5.0659e-09
K562	ENCFF010MMQ	ENCFF241TBP	ARHGAP35	SOX6	5027	37311	691	750	0.00139877	1
K562	ENCFF010MMQ	ENCFF300XUA	ARHGAP35	SP1	5027	14898	643	299	5.90158e-67	6.38793e-62
K562	ENCFF010MMQ	ENCFF002CMJ	ARHGAP35	SPI1	5027	28677	325	576	1.29466e-30	1.40136e-25
K562	ENCFF010MMQ	ENCFF985TSH	ARHGAP35	SREBF1	5027	2865	96	57	6.49875e-07	0.0703432
K562	ENCFF010MMQ	ENCFF798URE	ARHGAP35	SRSF1	5027	1170	80	23	1.24373e-20	1.34623e-15
K562	ENCFF010MMQ	ENCFF722XRW	ARHGAP35	SRSF3	5027	1984	87	39	1.44982e-11	1.5693e-06
K562	ENCFF010MMQ	ENCFF059WVE	ARHGAP35	SRSF7	5027	208	4	4	0.195367	1
K562	ENCFF010MMQ	ENCFF137IBM	ARHGAP35	SRSF9	5027	29	0	0	1	1
K562	ENCFF010MMQ	ENCFF290HTJ	ARHGAP35	STAT1_0	5027	1337	35	26	0.0165264	1
K562	ENCFF010MMQ	ENCFF254MPF	ARHGAP35	STAT1_1	5027	1283	27	25	0.0708003	1
K562	ENCFF010MMQ	ENCFF498DOQ	ARHGAP35	STAT1_2	5027	957	14	19	0.0513508	1
K562	ENCFF010MMQ	ENCFF648NYF	ARHGAP35	STAT1_3	5027	2831	80	56	0.000478436	1
K562	ENCFF010MMQ	ENCFF841YFF	ARHGAP35	STAT2_0	5027	2097	42	42	0.0614361	1
K562	ENCFF010MMQ	ENCFF714VIT	ARHGAP35	STAT2_1	5027	3606	121	72	3.62953e-08	0.00392864
K562	ENCFF010MMQ	ENCFF696KPD	ARHGAP35	STAT5A	5027	13378	304	269	0.00257504	1
K562	ENCFF010MMQ	ENCFF484HCG	ARHGAP35	SUPT5H	5027	29659	1254	596	5.14281e-122	5.56663e-117
K562	ENCFF010MMQ	ENCFF822FWM	ARHGAP35	TAF1	5027	19025	558	382	6.80504e-18	7.36584e-13
K562	ENCFF010MMQ	ENCFF617CAZ	ARHGAP35	TAF15	5027	787	67	15	5.26924e-23	5.70348e-18
K562	ENCFF010MMQ	ENCFF034CQR	ARHGAP35	TAF7	5027	648	117	13	1.22113e-68	1.32176e-63
K562	ENCFF010MMQ	ENCFF785HXY	ARHGAP35	TAF9B	5027	15392	565	309	2.10561e-39	2.27913e-34
K562	ENCFF010MMQ	ENCFF284LRP_ENCFF482CEV	ARHGAP35	TAL1	5027	19046	199	382	2.15903e-25	2.33695e-20
K562	ENCFF010MMQ	ENCFF626MVT	ARHGAP35	TBL1XR1	5027	15770	335	317	0.0131954	1
K562	ENCFF010MMQ	ENCFF380FJL	ARHGAP35	TBP	5027	21570	530	433	6.88086e-07	0.0744791
K562	ENCFF010MMQ	ENCFF249EZR	ARHGAP35	TCF7	5027	5844	205	117	5.3868e-14	5.83073e-09
K562	ENCFF010MMQ	ENCFF312RFN	ARHGAP35	TCF7L2	5027	2119	92	42	1.00879e-11	1.09193e-06
K562	ENCFF010MMQ	ENCFF619BDC	ARHGAP35	TEAD2	5027	6623	115	133	0.0103665	1
K562	ENCFF010MMQ	ENCFF209MQX	ARHGAP35	TEAD4	5027	35771	564	719	2.4168e-10	2.61597e-05
K562	ENCFF010MMQ	ENCFF701MXF	ARHGAP35	TFDP1	5027	22661	463	455	0.0172852	1
K562	ENCFF010MMQ	ENCFF641LJY	ARHGAP35	THAP1	5027	5972	178	120	1.52784e-07	0.0165375
K562	ENCFF010MMQ	ENCFF671BFH	ARHGAP35	THRA	5027	1757	27	35	0.0283496	1
K562	ENCFF010MMQ	ENCFF294VWT	ARHGAP35	THRAP3	5027	4904	425	98	3.21154e-131	3.4762e-126
K562	ENCFF010MMQ	ENCFF262BVP	ARHGAP35	TOE1	5027	19775	808	397	1.89035e-73	2.04613e-68
K562	ENCFF010MMQ	ENCFF049CRW_ENCFF646VQW	ARHGAP35	TRIM24	5027	15621	614	314	4.72646e-51	5.11596e-46
K562	ENCFF010MMQ	ENCFF561IZB	ARHGAP35	TRIP13	5027	2520	455	50	6.26984e-263	6.78654e-258
K562	ENCFF010MMQ	ENCFF036YVI	ARHGAP35	TSC22D4	5027	3352	468	67	2.2169e-223	2.39959e-218
K562	ENCFF010MMQ	ENCFF730URE	ARHGAP35	U2AF1	5027	4352	143	87	9.58693e-09	0.0010377
K562	ENCFF010MMQ	ENCFF398EQF	ARHGAP35	U2AF2	5027	137	4	2	0.0902235	1
K562	ENCFF010MMQ	ENCFF671DOL	ARHGAP35	UBTF	5027	19212	313	386	1.3995e-05	1
K562	ENCFF010MMQ	ENCFF334FMW	ARHGAP35	USF1	5027	21340	282	429	8.26183e-15	8.94269e-10
K562	ENCFF010MMQ	ENCFF150VTD	ARHGAP35	USF2	5027	3664	80	73	0.0321813	1
K562	ENCFF010MMQ	ENCFF186QUP	ARHGAP35	VEZF1	5027	46383	675	932	1.40675e-19	1.52268e-14
K562	ENCFF010MMQ	ENCFF803LEC	ARHGAP35	XRCC3	5027	1986	45	39	0.0382482	1
K562	ENCFF010MMQ	ENCFF998KKJ	ARHGAP35	XRCC5	5027	13253	349	266	1.63476e-07	0.0176948
K562	ENCFF010MMQ	ENCFF706LIT	ARHGAP35	YBX1	5027	1358	534	27	0	0
K562	ENCFF010MMQ	ENCFF246HIU	ARHGAP35	YBX3	5027	2680	836	53	0	0
K562	ENCFF010MMQ	ENCFF926FUM_ENCFF328XKC	ARHGAP35	YY1	5027	12127	332	243	9.90558e-09	0.00107219
K562	ENCFF010MMQ	ENCFF253FON	ARHGAP35	ZBED1	5027	5913	332	118	1.33732e-58	1.44752e-53
K562	ENCFF010MMQ	ENCFF434QZL	ARHGAP35	ZBTB11	5027	7250	207	145	2.32446e-07	0.0251602
K562	ENCFF010MMQ	ENCFF561USY	ARHGAP35	ZBTB2	5027	18423	1371	370	0	0
K562	ENCFF010MMQ	ENCFF408FQC	ARHGAP35	ZBTB33	5027	60931	491	1225	2.73497e-126	2.96036e-121
K562	ENCFF010MMQ	ENCFF417LEJ	ARHGAP35	ZBTB40	5027	29759	1101	598	4.6803e-76	5.066e-71
K562	ENCFF010MMQ	ENCFF706ISJ	ARHGAP35	ZBTB7A	5027	30583	467	614	8.48265e-11	9.1817e-06
K562	ENCFF010MMQ	ENCFF589EVD	ARHGAP35	ZBTB8A	5027	955	58	19	3.50705e-13	3.79607e-08
K562	ENCFF010MMQ	ENCFF522JRK	ARHGAP35	ZC3H11A	5027	2624	96	52	1.43429e-08	0.00155249
K562	ENCFF010MMQ	ENCFF809OEX	ARHGAP35	ZC3H8	5027	12691	1427	255	0	0
K562	ENCFF010MMQ	ENCFF521CRG	ARHGAP35	ZFP36	5027	23635	291	475	2.419e-20	2.61835e-15
K562	ENCFF010MMQ	ENCFF396DNK	ARHGAP35	ZFP91	5027	14258	404	286	8.6733e-12	9.38807e-07
K562	ENCFF010MMQ	ENCFF433RKB	ARHGAP35	ZFX	5027	27044	433	543	1.20021e-07	0.0129912
K562	ENCFF010MMQ	ENCFF195ODE	ARHGAP35	ZHX1	5027	3453	351	69	6.79877e-128	7.35906e-123
K562	ENCFF010MMQ	ENCFF163VUK	ARHGAP35	ZKSCAN1	5027	14153	274	284	0.0201618	1
K562	ENCFF010MMQ	ENCFF529FWJ	ARHGAP35	ZKSCAN8	5027	11311	176	227	6.01521e-05	1
K562	ENCFF010MMQ	ENCFF597DIY	ARHGAP35	ZMIZ1	5027	1049	24	21	0.0661262	1
K562	ENCFF010MMQ	ENCFF511QHY	ARHGAP35	ZMYM3	5027	39230	243	788	7.43039e-115	8.04273e-110
K562	ENCFF010MMQ	ENCFF114IWY	ARHGAP35	ZNF143	5027	29873	348	600	1.64008e-29	1.77524e-24
K562	ENCFF010MMQ	ENCFF116DIO	ARHGAP35	ZNF148	5027	22956	375	461	3.89578e-06	0.421683
K562	ENCFF010MMQ	ENCFF721LDD	ARHGAP35	ZNF175	5027	18917	279	380	8.91839e-09	0.000965335
K562	ENCFF010MMQ	ENCFF853TZC	ARHGAP35	ZNF197	5027	10450	225	210	0.0157525	1
K562	ENCFF010MMQ	ENCFF891MVM	ARHGAP35	ZNF263	5027	3994	80	80	0.0445567	1
K562	ENCFF010MMQ	ENCFF344QKL	ARHGAP35	ZNF274	5027	3064	57	61	0.0461417	1
K562	ENCFF010MMQ	ENCFF386WKY	ARHGAP35	ZNF280A	5027	6438	505	129	1.69659e-138	1.8364e-133
K562	ENCFF010MMQ	ENCFF581ZZT	ARHGAP35	ZNF282	5027	12961	736	260	1.94943e-128	2.11008e-123
K562	ENCFF010MMQ	ENCFF921WMN	ARHGAP35	ZNF318	5027	10963	612	220	3.32447e-104	3.59844e-99
K562	ENCFF010MMQ	ENCFF744SVC	ARHGAP35	ZNF354B	5027	4779	27	96	6.19541e-17	6.70598e-12
K562	ENCFF010MMQ	ENCFF706SJZ	ARHGAP35	ZNF384	5027	19825	248	398	1.60824e-16	1.74078e-11
K562	ENCFF010MMQ	ENCFF388YOB	ARHGAP35	ZNF395	5027	25387	445	510	0.000248903	1
K562	ENCFF010MMQ	ENCFF834WGJ	ARHGAP35	ZNF507	5027	11748	17	236	1.97214e-77	2.13466e-72
K562	ENCFF010MMQ	ENCFF447QUG	ARHGAP35	ZNF512	5027	23246	812	467	8.00746e-48	8.66736e-43
K562	ENCFF010MMQ	ENCFF815TTY	ARHGAP35	ZNF584	5027	15035	223	302	3.06828e-07	0.0332114
K562	ENCFF010MMQ	ENCFF602AXP	ARHGAP35	ZNF589	5027	21343	355	429	2.39428e-05	1
K562	ENCFF010MMQ	ENCFF273TYA	ARHGAP35	ZNF592	5027	35259	400	708	5.32593e-37	5.76484e-32
K562	ENCFF010MMQ	ENCFF173NRW	ARHGAP35	ZNF644	5027	12705	243	255	0.0192028	1
K562	ENCFF010MMQ	ENCFF248AOD	ARHGAP35	ZNF766	5027	26482	399	532	2.45314e-10	2.65531e-05
K562	ENCFF010MMQ	ENCFF654BMD	ARHGAP35	ZNF83	5027	11272	287	226	1.20455e-05	1
K562	ENCFF010MMQ	ENCFF996IVU	ARHGAP35	ZNF830	5027	3460	135	69	7.05471e-13	7.63609e-08
K562	ENCFF010MMQ	ENCFF253NXR	ARHGAP35	ZSCAN29	5027	17315	733	348	1.69066e-72	1.82999e-67
K562	ENCFF010MMQ	ENCFF588OLK	ARHGAP35	ZZZ3	5027	3029	220	60	5.98324e-57	6.47632e-52
K562	ENCFF225MPC	ENCFF836VRV	ARID1B	2001-08-01	50204	11428	588	2294	0	0
K562	ENCFF225MPC	ENCFF396GUH	ARID1B	ADNP	50204	21217	4040	4260	1.93638e-05	1
K562	ENCFF225MPC	ENCFF360BTO	ARID1B	AFF1	50204	20613	8693	4139	0	0
K562	ENCFF225MPC	ENCFF010MMQ	ARID1B	ARHGAP35	50204	5027	929	1009	0.000503037	1
K562	ENCFF225MPC	ENCFF225MPC	ARID1B	ARID1B	50204	50204	50204	10081	0	0
K562	ENCFF225MPC	ENCFF332ICQ	ARID1B	ARID2	50204	11835	2137	2376	3.39766e-08	0.00367766
K562	ENCFF225MPC	ENCFF835KAT	ARID1B	ARID3A	50204	11550	6534	2319	0	0
K562	ENCFF225MPC	ENCFF235ZZP	ARID1B	ASH1L	50204	8152	1729	1637	0.000758067	1
K562	ENCFF225MPC	ENCFF002CVM	ARID1B	ATF1	50204	14864	8568	2984	0	0
K562	ENCFF225MPC	ENCFF968KBN	ARID1B	ATF2	50204	46506	6877	9339	2.58096e-158	2.79366e-153
K562	ENCFF225MPC	ENCFF958KNK	ARID1B	ATF3	50204	59815	18340	12011	0	0
K562	ENCFF225MPC	ENCFF710IEF	ARID1B	ATF4	50204	42275	7745	8489	1.15941e-17	1.25496e-12
K562	ENCFF225MPC	ENCFF868QLL	ARID1B	ATF7	50204	47113	16952	9461	0	0
K562	ENCFF225MPC	ENCFF423EMU	ARID1B	BACH1	50204	4708	2322	945	0	0
K562	ENCFF225MPC	ENCFF057ZUY	ARID1B	BCOR	50204	44533	8891	8942	0.00365719	1
K562	ENCFF225MPC	ENCFF002CVP	ARID1B	BDP1	50204	570	114	114	0.0373371	1
K562	ENCFF225MPC	ENCFF179NDS	ARID1B	BHLHE40	50204	27327	9603	5487	0	0
K562	ENCFF225MPC	ENCFF048OIZ	ARID1B	BMI1	50204	2818	424	565	8.26111e-11	8.94191e-06
K562	ENCFF225MPC	ENCFF549GMO	ARID1B	BRCA1	50204	951	33	190	5.54922e-45	6.00653e-40
K562	ENCFF225MPC	ENCFF714XHL	ARID1B	BRD4	50204	8192	1476	1645	1.2882e-06	0.139436
K562	ENCFF225MPC	ENCFF666LZV	ARID1B	BRD9	50204	18855	7632	3786	0	0
K562	ENCFF225MPC	ENCFF002CVR	ARID1B	BRF1	50204	221	57	44	0.00912225	1
K562	ENCFF225MPC	ENCFF002CVS	ARID1B	BRF2	50204	1087	82	218	2.51309e-26	2.7202e-21
K562	ENCFF225MPC	ENCFF996ZGL	ARID1B	C11orf30	50204	61206	11122	12291	4.27072e-28	4.62267e-23
K562	ENCFF225MPC	ENCFF642BNC	ARID1B	CBFA2T2	50204	32296	21770	6485	0	0
K562	ENCFF225MPC	ENCFF993GXU	ARID1B	CBFA2T3	50204	53515	31012	10746	0	0
K562	ENCFF225MPC	ENCFF484DKT	ARID1B	CBX1	50204	14582	2629	2928	1.05402e-09	0.000114088
K562	ENCFF225MPC	ENCFF455TDM	ARID1B	CBX3	50204	26746	7882	5371	1.48729e-225	1.60986e-220
K562	ENCFF225MPC	ENCFF062ARS	ARID1B	CBX5	50204	7083	1714	1422	5.93252e-15	6.42142e-10
K562	ENCFF225MPC	ENCFF456PQY	ARID1B	CBX8	50204	4702	17	944	0	0
K562	ENCFF225MPC	ENCFF874QUM	ARID1B	CC2D1A	50204	26447	9943	5310	0	0
K562	ENCFF225MPC	ENCFF583GKE	ARID1B	CCAR2	50204	543	217	109	2.79322e-20	3.02341e-15
K562	ENCFF225MPC	ENCFF002CVU	ARID1B	CCNT2	50204	20057	8060	4027	0	0
K562	ENCFF225MPC	ENCFF643TEZ	ARID1B	CDC5L	50204	5690	1610	1142	1.2591e-39	1.36286e-34
K562	ENCFF225MPC	ENCFF813LOW_ENCFF429XKT	ARID1B	CEBPB	50204	19338	6835	3883	0	0
K562	ENCFF225MPC	ENCFF925MHB	ARID1B	CEBPZ	50204	1303	133	261	7.76136e-19	8.40097e-14
K562	ENCFF225MPC	ENCFF859FVX	ARID1B	CHAMP1	50204	14318	6627	2875	0	0
K562	ENCFF225MPC	ENCFF684MLP	ARID1B	COPS2	50204	123	4	24	5.21875e-07	0.0564882
K562	ENCFF225MPC	ENCFF665FHC	ARID1B	CREB3	50204	14139	3941	2839	1.0851e-85	1.17452e-80
K562	ENCFF225MPC	ENCFF582YPB	ARID1B	CREB3L1	50204	22194	5665	4456	1.52502e-68	1.6507e-63
K562	ENCFF225MPC	ENCFF948TXN	ARID1B	CREM	50204	38796	14193	7790	0	0
K562	ENCFF225MPC	ENCFF117EWO	ARID1B	CSDE1	50204	5866	1478	1177	3.69391e-18	3.99832e-13
K562	ENCFF225MPC	ENCFF152VMJ	ARID1B	CTBP1	50204	48724	18368	9784	0	0
K562	ENCFF225MPC	ENCFF002DDJ_ENCFF002DBD	ARID1B	CTCF	50204	40743	2595	8181	0	0
K562	ENCFF225MPC	ENCFF962FQM	ARID1B	CTCFL	50204	12832	1471	2576	1.1609e-124	1.25657e-119
K562	ENCFF225MPC	ENCFF517YCC	ARID1B	CUX1	50204	6367	3215	1278	0	0
K562	ENCFF225MPC	ENCFF526HLP	ARID1B	DACH1	50204	19460	6921	3907	0	0
K562	ENCFF225MPC	ENCFF338HQY	ARID1B	DDX20	50204	10079	4549	2024	0	0
K562	ENCFF225MPC	ENCFF786WZD	ARID1B	DEAF1	50204	3565	665	715	0.00258134	1
K562	ENCFF225MPC	ENCFF408SNO	ARID1B	DIDO1	50204	7905	2402	1587	3.2362e-81	3.5029e-76
K562	ENCFF225MPC	ENCFF034PQD	ARID1B	DNMT1	50204	3604	1003	723	1.29884e-23	1.40587e-18
K562	ENCFF225MPC	ENCFF774QKS_ENCFF823SYE	ARID1B	DPF2	50204	20210	17053	4058	0	0
K562	ENCFF225MPC	ENCFF106DAY	ARID1B	E2F1	50204	23520	7987	4723	0	0
K562	ENCFF225MPC	ENCFF225TLP	ARID1B	E2F4	50204	10400	2015	2088	0.0024433	1
K562	ENCFF225MPC	ENCFF356ASJ	ARID1B	E2F5	50204	19472	6686	3910	0	0
K562	ENCFF225MPC	ENCFF417DTI_ENCFF917COW	ARID1B	E2F6	50204	14596	2902	2931	0.00641262	1
K562	ENCFF225MPC	ENCFF310AGG	ARID1B	E2F7	50204	3169	1381	636	3.52357e-144	3.81395e-139
K562	ENCFF225MPC	ENCFF925DJG	ARID1B	E2F8	50204	12738	4558	2557	3.45205e-278	3.73653e-273
K562	ENCFF225MPC	ENCFF083YCQ	ARID1B	E4F1	50204	28697	11108	5762	0	0
K562	ENCFF225MPC	ENCFF806BDC	ARID1B	EHMT2	50204	19437	7847	3903	0	0
K562	ENCFF225MPC	ENCFF502KHR	ARID1B	ELF4	50204	21065	6571	4230	2.52147e-243	2.72927e-238
K562	ENCFF225MPC	ENCFF019PEL	ARID1B	ELK1	50204	3967	854	796	0.00173363	1
K562	ENCFF225MPC	ENCFF549TYR	ARID1B	EP300	50204	28288	20379	5680	0	0
K562	ENCFF225MPC	ENCFF925ANU	ARID1B	EP400	50204	33534	12553	6734	0	0
K562	ENCFF225MPC	ENCFF213EPU	ARID1B	ESRRA	50204	33450	10466	6717	0	0
K562	ENCFF225MPC	ENCFF076YZO	ARID1B	ETS1	50204	11558	2522	2321	1.67811e-06	0.18164
K562	ENCFF225MPC	ENCFF772HOY	ARID1B	ETS2	50204	1762	238	353	1.63557e-11	1.77035e-06
K562	ENCFF225MPC	ENCFF404YMX	ARID1B	ETV1	50204	24198	9323	4859	0	0
K562	ENCFF225MPC	ENCFF545VNY	ARID1B	ETV6	50204	6732	3567	1351	0	0
K562	ENCFF225MPC	ENCFF820EVZ	ARID1B	EWSR1	50204	1795	170	360	2.31542e-29	2.50623e-24
K562	ENCFF225MPC	ENCFF883WYX	ARID1B	FIP1L1	50204	10793	1076	2167	2.65384e-149	2.87255e-144
K562	ENCFF225MPC	ENCFF002CVW	ARID1B	FOS	50204	7646	3636	1535	0	0
K562	ENCFF225MPC	ENCFF473GCH	ARID1B	FOSL1	50204	7973	5823	1601	0	0
K562	ENCFF225MPC	ENCFF809YFY	ARID1B	FOXA1	50204	1350	826	271	2.41507e-161	2.61409e-156
K562	ENCFF225MPC	ENCFF452SPE	ARID1B	FOXJ2	50204	15441	5403	3100	2.06671e-306	2.23703e-301
K562	ENCFF225MPC	ENCFF699ZII	ARID1B	FOXM1	50204	18535	11558	3722	0	0
K562	ENCFF225MPC	ENCFF142CPK	ARID1B	FUS	50204	2947	211	591	6.13839e-73	6.64426e-68
K562	ENCFF225MPC	ENCFF833FCO	ARID1B	GABPA	50204	15847	5951	3182	0	0
K562	ENCFF225MPC	ENCFF517KRT	ARID1B	GABPB1	50204	30655	7943	6156	3.6028e-106	3.89971e-101
K562	ENCFF225MPC	ENCFF632NQI	ARID1B	GATA1	50204	14605	11401	2932	0	0
K562	ENCFF225MPC	ENCFF732HOE	ARID1B	GATA2	50204	11622	8521	2333	0	0
K562	ENCFF225MPC	ENCFF253FZN	ARID1B	GATAD2A	50204	15131	7269	3038	0	0
K562	ENCFF225MPC	ENCFF549KOD	ARID1B	GATAD2B	50204	13320	5738	2674	0	0
K562	ENCFF225MPC	ENCFF126BCK	ARID1B	GMEB1	50204	27813	11237	5585	0	0
K562	ENCFF225MPC	ENCFF167HYX	ARID1B	GTF2A2	50204	6423	832	1289	7.17871e-43	7.77031e-38
K562	ENCFF225MPC	ENCFF002CWR	ARID1B	GTF2B	50204	2928	764	587	3.85144e-13	4.16883e-08
K562	ENCFF225MPC	ENCFF778RMG	ARID1B	GTF2E2	50204	16371	3075	3287	6.63577e-06	0.718262
K562	ENCFF225MPC	ENCFF002CYL	ARID1B	GTF3C2	50204	1858	454	373	5.04206e-06	0.545757
K562	ENCFF225MPC	ENCFF474NLG	ARID1B	HCFC1	50204	13559	2803	2722	0.00228454	1
K562	ENCFF225MPC	ENCFF580DYE	ARID1B	HDAC3	50204	10781	7644	2164	0	0
K562	ENCFF225MPC	ENCFF998HOR	ARID1B	HDAC6	50204	1761	177	353	1.27569e-25	1.38082e-20
K562	ENCFF225MPC	ENCFF939ZFS	ARID1B	HDAC8	50204	9908	1860	1989	0.00012846	1
K562	ENCFF225MPC	ENCFF676NPW	ARID1B	HES1	50204	11091	7292	2227	0	0
K562	ENCFF225MPC	ENCFF265LKN	ARID1B	HINFP	50204	8293	1935	1665	8.4321e-12	9.12698e-07
K562	ENCFF225MPC	ENCFF396NSO	ARID1B	HLTF	50204	12623	4389	2534	2.29436e-244	2.48344e-239
K562	ENCFF225MPC	ENCFF558DSF	ARID1B	HMBOX1	50204	28923	11083	5808	0	0
K562	ENCFF225MPC	ENCFF002CWT	ARID1B	HMGN3	50204	14587	4079	2929	3.42004e-90	3.70189e-85
K562	ENCFF225MPC	ENCFF292JRY	ARID1B	HNRNPH1	50204	315	33	63	1.1995e-05	1
K562	ENCFF225MPC	ENCFF777CWV	ARID1B	HNRNPK	50204	11589	470	2327	0	0
K562	ENCFF225MPC	ENCFF010STZ	ARID1B	HNRNPL	50204	8012	1045	1608	1.4994e-51	1.62296e-46
K562	ENCFF225MPC	ENCFF122QSN	ARID1B	HNRNPLL	50204	15382	2485	3088	3.05945e-30	3.31157e-25
K562	ENCFF225MPC	ENCFF768TJI	ARID1B	HNRNPUL1	50204	1122	226	225	0.0264687	1
K562	ENCFF225MPC	ENCFF835YLR	ARID1B	ID3	50204	24733	7004	4966	6.26719e-164	6.78367e-159
K562	ENCFF225MPC	ENCFF415YPX	ARID1B	ILF3	50204	4762	1253	956	6.58285e-21	7.12534e-16
K562	ENCFF225MPC	ENCFF176NOI	ARID1B	ILK	50204	2284	446	458	0.016117	1
K562	ENCFF225MPC	ENCFF388AJH	ARID1B	IRF1	50204	17589	2263	3532	2.1064e-116	2.27999e-111
K562	ENCFF225MPC	ENCFF284VUQ	ARID1B	IRF1_0	50204	14592	3338	2930	1.09155e-14	1.18151e-09
K562	ENCFF225MPC	ENCFF909LKK	ARID1B	IRF1_1	50204	12543	3474	2518	2.75948e-73	2.98688e-68
K562	ENCFF225MPC	ENCFF908UIY	ARID1B	IRF1_2	50204	13478	4287	2706	5.64498e-173	6.11018e-168
K562	ENCFF225MPC	ENCFF730RUF	ARID1B	IRF1_3	50204	1479	585	297	1.17604e-49	1.27296e-44
K562	ENCFF225MPC	ENCFF384YDT	ARID1B	IRF2	50204	8509	2291	1708	8.44865e-42	9.1449e-37
K562	ENCFF225MPC	ENCFF196DHR	ARID1B	IRF9	50204	9536	3213	1914	1.48336e-161	1.6056e-156
K562	ENCFF225MPC	ENCFF629BFI	ARID1B	JUN	50204	21668	11538	4351	0	0
K562	ENCFF225MPC	ENCFF417QAJ	ARID1B	JUN_0	50204	8729	6955	1752	0	0
K562	ENCFF225MPC	ENCFF573GQX	ARID1B	JUN_1	50204	4909	4103	985	0	0
K562	ENCFF225MPC	ENCFF192BTP	ARID1B	JUN_2	50204	6180	5114	1241	0	0
K562	ENCFF225MPC	ENCFF077UYM	ARID1B	JUN_3	50204	9310	6036	1869	0	0
K562	ENCFF225MPC	ENCFF426DUB	ARID1B	JUNB	50204	5347	3561	1073	0	0
K562	ENCFF225MPC	ENCFF337DKJ	ARID1B	JUND	50204	47775	22117	9593	0	0
K562	ENCFF225MPC	ENCFF772QPO	ARID1B	KAT8	50204	2268	459	455	0.0182941	1
K562	ENCFF225MPC	ENCFF838COI_ENCFF738WCE	ARID1B	KDM1A	50204	26253	12225	5272	0	0
K562	ENCFF225MPC	ENCFF042RAK	ARID1B	KDM4B	50204	8167	1981	1640	3.34491e-17	3.62057e-12
K562	ENCFF225MPC	ENCFF368TYM	ARID1B	KDM5B	50204	22700	3476	4558	1.07151e-63	1.15981e-58
K562	ENCFF225MPC	ENCFF962VSZ	ARID1B	KHSRP	50204	5187	2592	1041	0	0
K562	ENCFF225MPC	ENCFF717TWA	ARID1B	KLF1	50204	11788	2931	2367	5.77042e-30	6.24596e-25
K562	ENCFF225MPC	ENCFF802XZN	ARID1B	KLF13	50204	11910	2775	2391	1.41867e-15	1.53558e-10
K562	ENCFF225MPC	ENCFF844HBQ	ARID1B	KLF16	50204	17908	10478	3596	0	0
K562	ENCFF225MPC	ENCFF314ULQ	ARID1B	L3MBTL2	50204	53984	13183	10840	5.44519e-106	5.89393e-101
K562	ENCFF225MPC	ENCFF511OXK	ARID1B	LARP7	50204	9680	2478	1943	3.19129e-32	3.45428e-27
K562	ENCFF225MPC	ENCFF659WAF	ARID1B	LEF1	50204	21936	14227	4405	0	0
K562	ENCFF225MPC	ENCFF308IXJ	ARID1B	MAFF	50204	27637	7013	5549	2.18433e-80	2.36434e-75
K562	ENCFF225MPC	ENCFF927JBT	ARID1B	MAFG	50204	46186	10019	9274	8.6985e-16	9.41534e-11
K562	ENCFF225MPC	ENCFF812QPN	ARID1B	MAFK	50204	26965	7849	5415	2.20251e-211	2.38402e-206
K562	ENCFF225MPC	ENCFF799HIG_ENCFF422NGZ	ARID1B	MAX	50204	28672	8637	5757	7.06528e-274	7.64753e-269
K562	ENCFF225MPC	ENCFF470MLY	ARID1B	MBD2	50204	15555	5901	3123	0	0
K562	ENCFF225MPC	ENCFF226CZE	ARID1B	MCM2	50204	4703	628	944	1.34454e-28	1.45534e-23
K562	ENCFF225MPC	ENCFF679ITJ	ARID1B	MCM3	50204	2788	289	559	8.19147e-37	8.86653e-32
K562	ENCFF225MPC	ENCFF920RYJ	ARID1B	MCM5	50204	1736	93	348	1.47619e-59	1.59784e-54
K562	ENCFF225MPC	ENCFF577UJR	ARID1B	MEF2A	50204	1348	850	270	4.78707e-174	5.18158e-169
K562	ENCFF225MPC	ENCFF257RYT	ARID1B	MEF2D	50204	14762	6544	2964	0	0
K562	ENCFF225MPC	ENCFF613RNG	ARID1B	MEIS2	50204	53002	17923	10643	0	0
K562	ENCFF225MPC	ENCFF670ZCR	ARID1B	MGA	50204	33894	8022	6806	1.13385e-47	1.22729e-42
K562	ENCFF225MPC	ENCFF365NKO	ARID1B	MIER1	50204	9498	2015	1907	0.000441548	1
K562	ENCFF225MPC	ENCFF497XOD	ARID1B	MITF	50204	34801	6597	6988	7.06953e-08	0.00765213
K562	ENCFF225MPC	ENCFF973OME_ENCFF059ONJ	ARID1B	MNT	50204	17605	6093	3535	0	0
K562	ENCFF225MPC	ENCFF769GYG	ARID1B	MTA1	50204	17990	9676	3612	0	0
K562	ENCFF225MPC	ENCFF350YXB	ARID1B	MTA3	50204	28818	10419	5787	0	0
K562	ENCFF225MPC	ENCFF970LCB	ARID1B	MXI1	50204	9033	2591	1813	9.77041e-67	1.05756e-61
K562	ENCFF225MPC	ENCFF877ANE	ARID1B	MYBL2	50204	4580	1919	919	4.31942e-182	4.67538e-177
K562	ENCFF225MPC	ENCFF465JKF	ARID1B	MYC	50204	31436	10287	6312	0	0
K562	ENCFF225MPC	ENCFF099SDW	ARID1B	MYC_0	50204	21468	7724	4311	0	0
K562	ENCFF225MPC	ENCFF634AYU	ARID1B	MYC_1	50204	8915	3277	1790	1.0523e-217	1.13902e-212
K562	ENCFF225MPC	ENCFF676YJE	ARID1B	MYC_2	50204	37659	13133	7562	0	0
K562	ENCFF225MPC	ENCFF387LTN	ARID1B	MYC_3	50204	12479	4624	2505	0	0
K562	ENCFF225MPC	ENCFF583DZD	ARID1B	MYNN	50204	15422	7065	3096	0	0
K562	ENCFF225MPC	ENCFF074EZL	ARID1B	NBN	50204	20957	10833	4208	0	0
K562	ENCFF225MPC	ENCFF495CSO	ARID1B	NCOA4	50204	3079	1145	618	1.96874e-80	2.13099e-75
K562	ENCFF225MPC	ENCFF322DSX	ARID1B	NCOA6	50204	4645	1278	932	1.20396e-27	1.30318e-22
K562	ENCFF225MPC	ENCFF165BCW_ENCFF366UBB	ARID1B	NCOR1	50204	17482	16145	3510	0	0
K562	ENCFF225MPC	ENCFF002CXG	ARID1B	NELFE	50204	458	102	91	0.0208209	1
K562	ENCFF225MPC	ENCFF581YKY	ARID1B	NEUROD1	50204	14353	6518	2882	0	0
K562	ENCFF225MPC	ENCFF495MHZ	ARID1B	NFE2	50204	30144	13257	6053	0	0
K562	ENCFF225MPC	ENCFF175IUO	ARID1B	NFE2L1	50204	7430	2607	1492	1.84853e-150	2.00087e-145
K562	ENCFF225MPC	ENCFF370ENX	ARID1B	NFIC	50204	48576	14894	9754	0	0
K562	ENCFF225MPC	ENCFF157UUF	ARID1B	NFRKB	50204	22856	5344	4589	1.35612e-28	1.46788e-23
K562	ENCFF225MPC	ENCFF986MHU	ARID1B	NFXL1	50204	6160	893	1237	1.27037e-25	1.37506e-20
K562	ENCFF225MPC	ENCFF012VES	ARID1B	NFYA	50204	4382	472	879	9.29253e-52	1.00583e-46
K562	ENCFF225MPC	ENCFF113PMT	ARID1B	NFYB	50204	8952	683	1797	2.12124e-199	2.29605e-194
K562	ENCFF225MPC	ENCFF906PGD	ARID1B	NKRF	50204	18069	3806	3628	8.80144e-05	1
K562	ENCFF225MPC	ENCFF776YPS	ARID1B	NONO	50204	12558	4082	2521	2.32231e-179	2.51369e-174
K562	ENCFF225MPC	ENCFF954NAJ	ARID1B	NR0B1	50204	405	48	81	2.16531e-05	1
K562	ENCFF225MPC	ENCFF664ZGR	ARID1B	NR2C1	50204	15500	5598	3112	0	0
K562	ENCFF225MPC	ENCFF594LCH	ARID1B	NR2C2	50204	634	86	127	2.44017e-05	1
K562	ENCFF225MPC	ENCFF175IIE	ARID1B	NR2F1	50204	37884	15105	7607	0	0
K562	ENCFF225MPC	ENCFF255EOB	ARID1B	NR2F2	50204	21050	11865	4227	0	0
K562	ENCFF225MPC	ENCFF712AXK	ARID1B	NR2F6	50204	23333	10854	4685	0	0
K562	ENCFF225MPC	ENCFF859NPS	ARID1B	NR4A1	50204	20688	5751	4154	6.39748e-122	6.9247e-117
K562	ENCFF225MPC	ENCFF144PPR_ENCFF493ABN	ARID1B	NRF1	50204	17306	3300	3475	7.85192e-05	1
K562	ENCFF225MPC	ENCFF289BUU	ARID1B	NUFIP1	50204	3572	1578	717	2.11722e-169	2.2917e-164
K562	ENCFF225MPC	ENCFF168HAG	ARID1B	PBX2	50204	36719	11578	7373	0	0
K562	ENCFF225MPC	ENCFF941RVL	ARID1B	PCBP1	50204	10920	934	2192	6.52125e-203	7.05866e-198
K562	ENCFF225MPC	ENCFF881XQF	ARID1B	PCBP2	50204	2539	93	509	4.03287e-114	4.36522e-109
K562	ENCFF225MPC	ENCFF462FRU	ARID1B	PHB2	50204	7367	4440	1479	0	0
K562	ENCFF225MPC	ENCFF948YVM	ARID1B	PHF20	50204	15696	3075	3152	0.00278707	1
K562	ENCFF225MPC	ENCFF134CUM	ARID1B	PHF21A	50204	8976	3638	1802	0	0
K562	ENCFF225MPC	ENCFF626KTJ	ARID1B	PHF8	50204	29046	3617	5832	1.88298e-214	2.03815e-209
K562	ENCFF225MPC	ENCFF544XKC	ARID1B	PKNOX1	50204	52588	15216	10560	0	0
K562	ENCFF225MPC	ENCFF881QBT	ARID1B	PML	50204	21322	9376	4281	0	0
K562	ENCFF225MPC	ENCFF662YQK	ARID1B	POLR2A_0	50204	19534	3226	3922	1.91362e-31	2.07132e-26
K562	ENCFF225MPC	ENCFF853ZMA	ARID1B	POLR2A_1	50204	22578	3453	4534	6.27127e-64	6.78808e-59
K562	ENCFF225MPC	ENCFF206YXX	ARID1B	POLR2A_2	50204	19284	3310	3872	1.59526e-21	1.72672e-16
K562	ENCFF225MPC	ENCFF270QAB	ARID1B	POLR2A_3	50204	23423	3851	4703	1.15249e-38	1.24747e-33
K562	ENCFF225MPC	ENCFF296CNQ	ARID1B	POLR2AphosphoS2	50204	10069	1137	2022	9.90609e-103	1.07224e-97
K562	ENCFF225MPC	ENCFF542DOG	ARID1B	POLR2AphosphoS5	50204	30324	11134	6089	0	0
K562	ENCFF225MPC	ENCFF872JJJ	ARID1B	POLR2B	50204	20684	3758	4153	2.41922e-11	2.61859e-06
K562	ENCFF225MPC	ENCFF273EYJ	ARID1B	POLR2G	50204	58571	3904	11761	0	0
K562	ENCFF225MPC	ENCFF801YZV	ARID1B	POLR2H	50204	23424	4664	4703	0.00496707	1
K562	ENCFF225MPC	ENCFF002CXW	ARID1B	POLR3A	50204	1310	283	263	0.01129	1
K562	ENCFF225MPC	ENCFF002CXT	ARID1B	POLR3G	50204	207	48	41	0.0326319	1
K562	ENCFF225MPC	ENCFF990CFV	ARID1B	POU5F1	50204	2219	405	445	0.00310337	1
K562	ENCFF225MPC	ENCFF294HEI	ARID1B	PRDM10	50204	29758	7670	5975	8.29812e-99	8.98197e-94
K562	ENCFF225MPC	ENCFF785ACI	ARID1B	PRPF4	50204	6788	710	1363	4.78149e-85	5.17553e-80
K562	ENCFF225MPC	ENCFF694BIA	ARID1B	PTBP1	50204	5027	955	1009	0.00296355	1
K562	ENCFF225MPC	ENCFF007DKB	ARID1B	PTRF	50204	5154	830	1035	4.74933e-12	5.14072e-07
K562	ENCFF225MPC	ENCFF332DRG	ARID1B	PTTG1	50204	5547	894	1113	1.21799e-12	1.31837e-07
K562	ENCFF225MPC	ENCFF421KIV	ARID1B	PYGO2	50204	4223	1509	848	2.44046e-93	2.64158e-88
K562	ENCFF225MPC	ENCFF002CXU	ARID1B	RAD21	50204	17627	1266	3539	0	0
K562	ENCFF225MPC	ENCFF096XMD	ARID1B	RAD51	50204	17974	4670	3609	6.91188e-65	7.48149e-60
K562	ENCFF225MPC	ENCFF975IRM	ARID1B	RB1	50204	25768	4426	5174	1.18817e-27	1.28609e-22
K562	ENCFF225MPC	ENCFF379MPS	ARID1B	RBBP5	50204	24338	3613	4887	2.90952e-82	3.1493e-77
K562	ENCFF225MPC	ENCFF120IDE	ARID1B	RBFOX2	50204	56370	5533	11319	0	0
K562	ENCFF225MPC	ENCFF682SIY	ARID1B	RBM14	50204	3099	250	622	6.40976e-65	6.93799e-60
K562	ENCFF225MPC	ENCFF971VJZ	ARID1B	RBM15	50204	400	45	80	6.57172e-06	0.711329
K562	ENCFF225MPC	ENCFF861YKK	ARID1B	RBM17	50204	47	5	9	0.0607269	1
K562	ENCFF225MPC	ENCFF522JUV	ARID1B	RBM22	50204	13050	911	2620	0	0
K562	ENCFF225MPC	ENCFF680WBN	ARID1B	RBM25	50204	49721	1565	9984	0	0
K562	ENCFF225MPC	ENCFF782GWS	ARID1B	RBM34	50204	1085	63	217	4.54803e-35	4.92284e-30
K562	ENCFF225MPC	ENCFF209JJD	ARID1B	RBM39	50204	2747	729	551	6.99942e-14	7.57624e-09
K562	ENCFF225MPC	ENCFF484CKD	ARID1B	RCOR1	50204	6822	4160	1369	0	0
K562	ENCFF225MPC	ENCFF580QGA	ARID1B	RELA	50204	10319	2169	2072	0.000915651	1
K562	ENCFF225MPC	ENCFF237UAN_ENCFF010UHD	ARID1B	RFX1	50204	13929	1792	2797	9.98759e-93	1.08107e-87
K562	ENCFF225MPC	ENCFF716LRI	ARID1B	RFX5	50204	2725	597	547	0.0017756	1
K562	ENCFF225MPC	ENCFF209HKW	ARID1B	RLF	50204	10587	3643	2126	3.64834e-196	3.949e-191
K562	ENCFF225MPC	ENCFF478MPX	ARID1B	SAFB	50204	5923	551	1189	1.58877e-95	1.7197e-90
K562	ENCFF225MPC	ENCFF624NUZ	ARID1B	SAFB2	50204	82	4	16	0.000307296	1
K562	ENCFF225MPC	ENCFF718NUA	ARID1B	SAP30	50204	14058	1573	2823	4.44991e-146	4.81662e-141
K562	ENCFF225MPC	ENCFF294EHN	ARID1B	SETDB1	50204	4113	477	825	4.19143e-40	4.53684e-35
K562	ENCFF225MPC	ENCFF757ODD	ARID1B	SFPQ	50204	228	22	45	5.97939e-05	1
K562	ENCFF225MPC	ENCFF191MPD	ARID1B	SIN3A	50204	13459	2139	2702	3.03444e-30	3.28451e-25
K562	ENCFF225MPC	ENCFF280GTU	ARID1B	SIN3B	50204	10501	1431	2108	5.5491e-56	6.0064e-51
K562	ENCFF225MPC	ENCFF002CXZ	ARID1B	SIRT6	50204	2305	1863	462	0	0
K562	ENCFF225MPC	ENCFF033EBX_ENCFF002CMM	ARID1B	SIX5	50204	3194	436	641	1.67767e-18	1.81593e-13
K562	ENCFF225MPC	ENCFF481WGW	ARID1B	SKIL	50204	24313	7662	4882	1.5996e-295	1.73142e-290
K562	ENCFF225MPC	ENCFF315YAF	ARID1B	SMAD1	50204	8855	3380	1778	4.04661e-250	4.38009e-245
K562	ENCFF225MPC	ENCFF011KRN	ARID1B	SMAD2	50204	200	35	40	0.0485387	1
K562	ENCFF225MPC	ENCFF178MOP	ARID1B	SMAD5	50204	22325	3404	4483	1.89982e-64	2.05639e-59
K562	ENCFF225MPC	ENCFF995NIE	ARID1B	SMARCA5	50204	19278	2952	3871	1.65859e-54	1.79527e-49
K562	ENCFF225MPC	ENCFF944GJH	ARID1B	SMARCB1	50204	3079	1320	618	7.28652e-133	7.887e-128
K562	ENCFF225MPC	ENCFF114PTZ	ARID1B	SMARCC2	50204	19106	12963	3836	0	0
K562	ENCFF225MPC	ENCFF622RBW	ARID1B	SMARCE1	50204	36356	24004	7300	0	0
K562	ENCFF225MPC	ENCFF041YQC	ARID1B	SMC3	50204	26872	2565	5396	0	0
K562	ENCFF225MPC	ENCFF494ZUY	ARID1B	SNIP1	50204	3268	894	656	2.01177e-19	2.17756e-14
K562	ENCFF225MPC	ENCFF033KXY	ARID1B	SNRNP70	50204	882	61	177	3.5542e-24	3.8471e-19
K562	ENCFF225MPC	ENCFF241TBP	ARID1B	SOX6	50204	37311	21520	7492	0	0
K562	ENCFF225MPC	ENCFF300XUA	ARID1B	SP1	50204	14898	2147	2991	3.34868e-60	3.62465e-55
K562	ENCFF225MPC	ENCFF002CMJ	ARID1B	SPI1	50204	28677	5850	5758	0.00251082	1
K562	ENCFF225MPC	ENCFF985TSH	ARID1B	SREBF1	50204	2865	734	575	2.48958e-11	2.69474e-06
K562	ENCFF225MPC	ENCFF798URE	ARID1B	SRSF1	50204	1170	169	234	1.38752e-06	0.150186
K562	ENCFF225MPC	ENCFF722XRW	ARID1B	SRSF3	50204	1984	175	398	1.20059e-36	1.29953e-31
K562	ENCFF225MPC	ENCFF059WVE	ARID1B	SRSF7	50204	208	13	41	2.32186e-07	0.025132
K562	ENCFF225MPC	ENCFF137IBM	ARID1B	SRSF9	50204	29	2	5	0.0842243	1
K562	ENCFF225MPC	ENCFF290HTJ	ARID1B	STAT1_0	50204	1337	852	268	6.30863e-177	6.82852e-172
K562	ENCFF225MPC	ENCFF254MPF	ARID1B	STAT1_1	50204	1283	645	257	8.77368e-92	9.49672e-87
K562	ENCFF225MPC	ENCFF498DOQ	ARID1B	STAT1_2	50204	957	544	192	1.13441e-95	1.22789e-90
K562	ENCFF225MPC	ENCFF648NYF	ARID1B	STAT1_3	50204	2831	1248	568	5.29593e-134	5.73236e-129
K562	ENCFF225MPC	ENCFF841YFF	ARID1B	STAT2_0	50204	2097	1125	421	3.88496e-177	4.20512e-172
K562	ENCFF225MPC	ENCFF714VIT	ARID1B	STAT2_1	50204	3606	2341	724	0	0
K562	ENCFF225MPC	ENCFF696KPD	ARID1B	STAT5A	50204	13378	10036	2686	0	0
K562	ENCFF225MPC	ENCFF484HCG	ARID1B	SUPT5H	50204	29659	4006	5956	8.58509e-160	9.29259e-155
K562	ENCFF225MPC	ENCFF822FWM	ARID1B	TAF1	50204	19025	4525	3820	1.29816e-29	1.40514e-24
K562	ENCFF225MPC	ENCFF617CAZ	ARID1B	TAF15	50204	787	68	158	3.13109e-16	3.38913e-11
K562	ENCFF225MPC	ENCFF034CQR	ARID1B	TAF7	50204	648	165	130	0.000405563	1
K562	ENCFF225MPC	ENCFF785HXY	ARID1B	TAF9B	50204	15392	6953	3090	0	0
K562	ENCFF225MPC	ENCFF284LRP_ENCFF482CEV	ARID1B	TAL1	50204	19046	17069	3824	0	0
K562	ENCFF225MPC	ENCFF626MVT	ARID1B	TBL1XR1	50204	15770	9919	3166	0	0
K562	ENCFF225MPC	ENCFF380FJL	ARID1B	TBP	50204	21570	5410	4331	4.8186e-57	5.2157e-52
K562	ENCFF225MPC	ENCFF249EZR	ARID1B	TCF7	50204	5844	2594	1173	8.85741e-280	9.58735e-275
K562	ENCFF225MPC	ENCFF312RFN	ARID1B	TCF7L2	50204	2119	728	425	3.9493e-41	4.27476e-36
K562	ENCFF225MPC	ENCFF619BDC	ARID1B	TEAD2	50204	6623	2219	1330	5.24019e-110	5.67204e-105
K562	ENCFF225MPC	ENCFF209MQX	ARID1B	TEAD4	50204	35771	22609	7183	0	0
K562	ENCFF225MPC	ENCFF701MXF	ARID1B	TFDP1	50204	22661	4552	4550	0.00591031	1
K562	ENCFF225MPC	ENCFF641LJY	ARID1B	THAP1	50204	5972	779	1199	4.4043e-39	4.76725e-34
K562	ENCFF225MPC	ENCFF671BFH	ARID1B	THRA	50204	1757	617	352	8.0283e-38	8.68991e-33
K562	ENCFF225MPC	ENCFF294VWT	ARID1B	THRAP3	50204	4904	1074	984	0.00022388	1
K562	ENCFF225MPC	ENCFF262BVP	ARID1B	TOE1	50204	19775	8266	3971	0	0
K562	ENCFF225MPC	ENCFF049CRW_ENCFF646VQW	ARID1B	TRIM24	50204	15621	10750	3136	0	0
K562	ENCFF225MPC	ENCFF561IZB	ARID1B	TRIP13	50204	2520	669	506	6.99466e-13	7.57109e-08
K562	ENCFF225MPC	ENCFF036YVI	ARID1B	TSC22D4	50204	3352	186	673	7.01359e-110	7.59158e-105
K562	ENCFF225MPC	ENCFF730URE	ARID1B	U2AF1	50204	4352	420	873	1.03533e-65	1.12065e-60
K562	ENCFF225MPC	ENCFF398EQF	ARID1B	U2AF2	50204	137	3	27	6.16579e-09	0.000667392
K562	ENCFF225MPC	ENCFF671DOL	ARID1B	UBTF	50204	19212	4533	3858	3.19874e-27	3.46234e-22
K562	ENCFF225MPC	ENCFF334FMW	ARID1B	USF1	50204	21340	4382	4285	0.0020268	1
K562	ENCFF225MPC	ENCFF150VTD	ARID1B	USF2	50204	3664	669	735	0.000725879	1
K562	ENCFF225MPC	ENCFF186QUP	ARID1B	VEZF1	50204	46383	12885	9314	1.96807e-268	2.13026e-263
K562	ENCFF225MPC	ENCFF803LEC	ARID1B	XRCC3	50204	1986	226	398	1.86257e-21	2.01606e-16
K562	ENCFF225MPC	ENCFF998KKJ	ARID1B	XRCC5	50204	13253	3029	2661	1.93216e-13	2.09139e-08
K562	ENCFF225MPC	ENCFF706LIT	ARID1B	YBX1	50204	1358	232	272	0.00118305	1
K562	ENCFF225MPC	ENCFF246HIU	ARID1B	YBX3	50204	2680	479	538	0.000632836	1
K562	ENCFF225MPC	ENCFF926FUM_ENCFF328XKC	ARID1B	YY1	50204	12127	2306	2435	0.000256176	1
K562	ENCFF225MPC	ENCFF253FON	ARID1B	ZBED1	50204	5913	2266	1187	1.63453e-170	1.76923e-165
K562	ENCFF225MPC	ENCFF434QZL	ARID1B	ZBTB11	50204	7250	1577	1455	6.92242e-05	1
K562	ENCFF225MPC	ENCFF561USY	ARID1B	ZBTB2	50204	18423	7938	3699	0	0
K562	ENCFF225MPC	ENCFF408FQC	ARID1B	ZBTB33	50204	60931	2272	12235	0	0
K562	ENCFF225MPC	ENCFF417LEJ	ARID1B	ZBTB40	50204	29759	5150	5976	5.30958e-29	5.74714e-24
K562	ENCFF225MPC	ENCFF706ISJ	ARID1B	ZBTB7A	50204	30583	5433	6141	1.92836e-21	2.08728e-16
K562	ENCFF225MPC	ENCFF589EVD	ARID1B	ZBTB8A	50204	955	182	191	0.023829	1
K562	ENCFF225MPC	ENCFF522JRK	ARID1B	ZC3H11A	50204	2624	700	526	7.36109e-14	7.96772e-09
K562	ENCFF225MPC	ENCFF809OEX	ARID1B	ZC3H8	50204	12691	5516	2548	0	0
K562	ENCFF225MPC	ENCFF521CRG	ARID1B	ZFP36	50204	23635	3345	4746	4.01212e-103	4.34275e-98
K562	ENCFF225MPC	ENCFF396DNK	ARID1B	ZFP91	50204	14258	2622	2863	2.27655e-07	0.0246417
K562	ENCFF225MPC	ENCFF433RKB	ARID1B	ZFX	50204	27044	4027	5430	1.8245e-89	1.97486e-84
K562	ENCFF225MPC	ENCFF195ODE	ARID1B	ZHX1	50204	3453	807	693	1.91327e-06	0.207095
K562	ENCFF225MPC	ENCFF163VUK	ARID1B	ZKSCAN1	50204	14153	3522	2842	1.04627e-35	1.13249e-30
K562	ENCFF225MPC	ENCFF529FWJ	ARID1B	ZKSCAN8	50204	11311	3612	2271	1.9159e-148	2.07379e-143
K562	ENCFF225MPC	ENCFF597DIY	ARID1B	ZMIZ1	50204	1049	208	210	0.0273877	1
K562	ENCFF225MPC	ENCFF511QHY	ARID1B	ZMYM3	50204	39230	2082	7878	0	0
K562	ENCFF225MPC	ENCFF114IWY	ARID1B	ZNF143	50204	29873	3826	5998	3.91198e-199	4.23436e-194
K562	ENCFF225MPC	ENCFF116DIO	ARID1B	ZNF148	50204	22956	6013	4609	1.1286e-87	1.2216e-82
K562	ENCFF225MPC	ENCFF721LDD	ARID1B	ZNF175	50204	18917	6301	3798	2.73503e-301	2.96042e-296
K562	ENCFF225MPC	ENCFF853TZC	ARID1B	ZNF197	50204	10450	3648	2098	3.52133e-206	3.81152e-201
K562	ENCFF225MPC	ENCFF891MVM	ARID1B	ZNF263	50204	3994	512	802	1.23555e-28	1.33737e-23
K562	ENCFF225MPC	ENCFF344QKL	ARID1B	ZNF274	50204	3064	986	615	1.2457e-43	1.34836e-38
K562	ENCFF225MPC	ENCFF386WKY	ARID1B	ZNF280A	50204	6438	407	1292	1.33145e-182	1.44118e-177
K562	ENCFF225MPC	ENCFF581ZZT	ARID1B	ZNF282	50204	12961	4887	2602	0	0
K562	ENCFF225MPC	ENCFF921WMN	ARID1B	ZNF318	50204	10963	6811	2201	0	0
K562	ENCFF225MPC	ENCFF744SVC	ARID1B	ZNF354B	50204	4779	392	959	2.31185e-96	2.50237e-91
K562	ENCFF225MPC	ENCFF706SJZ	ARID1B	ZNF384	50204	19825	5062	3981	1.26708e-61	1.3715e-56
K562	ENCFF225MPC	ENCFF388YOB	ARID1B	ZNF395	50204	25387	7492	5098	5.21973e-216	5.64988e-211
K562	ENCFF225MPC	ENCFF834WGJ	ARID1B	ZNF507	50204	11748	144	2359	0	0
K562	ENCFF225MPC	ENCFF447QUG	ARID1B	ZNF512	50204	23246	802	4668	0	0
K562	ENCFF225MPC	ENCFF815TTY	ARID1B	ZNF584	50204	15035	4915	3019	7.35475e-220	7.96085e-215
K562	ENCFF225MPC	ENCFF602AXP	ARID1B	ZNF589	50204	21343	7077	4286	0	0
K562	ENCFF225MPC	ENCFF273TYA	ARID1B	ZNF592	50204	35259	11976	7080	0	0
K562	ENCFF225MPC	ENCFF173NRW	ARID1B	ZNF644	50204	12705	4640	2551	3.17625e-301	3.438e-296
K562	ENCFF225MPC	ENCFF248AOD	ARID1B	ZNF766	50204	26482	9140	5318	0	0
K562	ENCFF225MPC	ENCFF654BMD	ARID1B	ZNF83	50204	11272	3732	2263	9.77455e-176	1.05801e-170
K562	ENCFF225MPC	ENCFF996IVU	ARID1B	ZNF830	50204	3460	931	694	1.8101e-18	1.95927e-13
K562	ENCFF225MPC	ENCFF253NXR	ARID1B	ZSCAN29	50204	17315	5452	3477	2.56875e-210	2.78044e-205
K562	ENCFF225MPC	ENCFF588OLK	ARID1B	ZZZ3	50204	3029	903	608	1.31459e-29	1.42293e-24
K562	ENCFF332ICQ	ENCFF836VRV	ARID2	2001-08-01	11835	11428	367	541	4.00119e-16	4.33093e-11
K562	ENCFF332ICQ	ENCFF396GUH	ARID2	ADNP	11835	21217	553	1004	3.93021e-55	4.2541e-50
K562	ENCFF332ICQ	ENCFF360BTO	ARID2	AFF1	11835	20613	2025	975	1.51549e-189	1.64038e-184
K562	ENCFF332ICQ	ENCFF010MMQ	ARID2	ARHGAP35	11835	5027	1137	237	0	0
K562	ENCFF332ICQ	ENCFF225MPC	ARID2	ARID1B	11835	50204	2106	2376	1.02077e-09	0.000110489
K562	ENCFF332ICQ	ENCFF332ICQ	ARID2	ARID2	11835	11835	11835	560	0	0
K562	ENCFF332ICQ	ENCFF835KAT	ARID2	ARID3A	11835	11550	1227	546	2.15821e-138	2.33607e-133
K562	ENCFF332ICQ	ENCFF235ZZP	ARID2	ASH1L	11835	8152	1051	385	8.80991e-172	9.53593e-167
K562	ENCFF332ICQ	ENCFF002CVM	ARID2	ATF1	11835	14864	453	703	1.43694e-24	1.55535e-19
K562	ENCFF332ICQ	ENCFF968KBN	ARID2	ATF2	11835	46506	858	2201	8.17596e-235	8.84974e-230
K562	ENCFF332ICQ	ENCFF958KNK	ARID2	ATF3	11835	59815	977	2831	0	0
K562	ENCFF332ICQ	ENCFF710IEF	ARID2	ATF4	11835	42275	1049	2001	7.192e-122	7.7847e-117
K562	ENCFF332ICQ	ENCFF868QLL	ARID2	ATF7	11835	47113	3243	2230	2.17496e-90	2.3542e-85
K562	ENCFF332ICQ	ENCFF423EMU	ARID2	BACH1	11835	4708	300	222	1.01558e-07	0.0109927
K562	ENCFF332ICQ	ENCFF057ZUY	ARID2	BCOR	11835	44533	2498	2108	1.31772e-17	1.42631e-12
K562	ENCFF332ICQ	ENCFF002CVP	ARID2	BDP1	11835	570	17	26	0.0162863	1
K562	ENCFF332ICQ	ENCFF179NDS	ARID2	BHLHE40	11835	27327	2149	1293	3.46756e-105	3.75333e-100
K562	ENCFF332ICQ	ENCFF048OIZ	ARID2	BMI1	11835	2818	216	133	9.77016e-12	1.05753e-06
K562	ENCFF332ICQ	ENCFF549GMO	ARID2	BRCA1	11835	951	11	45	1.09883e-09	0.000118938
K562	ENCFF332ICQ	ENCFF714XHL	ARID2	BRD4	11835	8192	546	387	4.65666e-15	5.04041e-10
K562	ENCFF332ICQ	ENCFF666LZV	ARID2	BRD9	11835	18855	3020	892	0	0
K562	ENCFF332ICQ	ENCFF002CVR	ARID2	BRF1	11835	221	4	10	0.0189166	1
K562	ENCFF332ICQ	ENCFF002CVS	ARID2	BRF2	11835	1087	21	51	1.00372e-06	0.108643
K562	ENCFF332ICQ	ENCFF996ZGL	ARID2	C11orf30	11835	61206	1063	2897	0	0
K562	ENCFF332ICQ	ENCFF642BNC	ARID2	CBFA2T2	11835	32296	718	1528	7.89741e-119	8.54823e-114
K562	ENCFF332ICQ	ENCFF993GXU	ARID2	CBFA2T3	11835	53515	1317	2533	1.07666e-156	1.16539e-151
K562	ENCFF332ICQ	ENCFF484DKT	ARID2	CBX1	11835	14582	911	690	1.48072e-16	1.60274e-11
K562	ENCFF332ICQ	ENCFF455TDM	ARID2	CBX3	11835	26746	2010	1266	3.40456e-83	3.68513e-78
K562	ENCFF332ICQ	ENCFF062ARS	ARID2	CBX5	11835	7083	559	335	1.60676e-29	1.73917e-24
K562	ENCFF332ICQ	ENCFF456PQY	ARID2	CBX8	11835	4702	9	222	1.39328e-81	1.5081e-76
K562	ENCFF332ICQ	ENCFF874QUM	ARID2	CC2D1A	11835	26447	6303	1252	0	0
K562	ENCFF332ICQ	ENCFF583GKE	ARID2	CCAR2	11835	543	67	25	1.74852e-12	1.89261e-07
K562	ENCFF332ICQ	ENCFF002CVU	ARID2	CCNT2	11835	20057	855	949	0.000110354	1
K562	ENCFF332ICQ	ENCFF643TEZ	ARID2	CDC5L	11835	5690	1156	269	0	0
K562	ENCFF332ICQ	ENCFF813LOW_ENCFF429XKT	ARID2	CEBPB	11835	19338	677	915	2.49475e-17	2.70035e-12
K562	ENCFF332ICQ	ENCFF925MHB	ARID2	CEBPZ	11835	1303	64	61	0.0463158	1
K562	ENCFF332ICQ	ENCFF859FVX	ARID2	CHAMP1	11835	14318	1129	677	4.15703e-57	4.49961e-52
K562	ENCFF332ICQ	ENCFF684MLP	ARID2	COPS2	11835	123	4	5	0.175467	1
K562	ENCFF332ICQ	ENCFF665FHC	ARID2	CREB3	11835	14139	611	669	0.0012104	1
K562	ENCFF332ICQ	ENCFF582YPB	ARID2	CREB3L1	11835	22194	1445	1050	1.50234e-31	1.62615e-26
K562	ENCFF332ICQ	ENCFF948TXN	ARID2	CREM	11835	38796	3342	1836	3.30621e-218	3.57868e-213
K562	ENCFF332ICQ	ENCFF117EWO	ARID2	CSDE1	11835	5866	442	277	1.72235e-20	1.86429e-15
K562	ENCFF332ICQ	ENCFF152VMJ	ARID2	CTBP1	11835	48724	4168	2306	9.68592e-266	1.04841e-260
K562	ENCFF332ICQ	ENCFF002DDJ_ENCFF002DBD	ARID2	CTCF	11835	40743	7092	1928	0	0
K562	ENCFF332ICQ	ENCFF962FQM	ARID2	CTCFL	11835	12832	2157	607	0	0
K562	ENCFF332ICQ	ENCFF517YCC	ARID2	CUX1	11835	6367	521	301	4.44527e-31	4.8116e-26
K562	ENCFF332ICQ	ENCFF526HLP	ARID2	DACH1	11835	19460	1045	921	4.1555e-06	0.449795
K562	ENCFF332ICQ	ENCFF338HQY	ARID2	DDX20	11835	10079	1043	477	3.3616e-111	3.63863e-106
K562	ENCFF332ICQ	ENCFF786WZD	ARID2	DEAF1	11835	3565	152	168	0.0147172	1
K562	ENCFF332ICQ	ENCFF408SNO	ARID2	DIDO1	11835	7905	635	374	3.65155e-35	3.95248e-30
K562	ENCFF332ICQ	ENCFF034PQD	ARID2	DNMT1	11835	3604	871	170	0	0
K562	ENCFF332ICQ	ENCFF774QKS_ENCFF823SYE	ARID2	DPF2	11835	20210	1316	956	5.35925e-29	5.80091e-24
K562	ENCFF332ICQ	ENCFF106DAY	ARID2	E2F1	11835	23520	896	1113	1.8815e-12	2.03655e-07
K562	ENCFF332ICQ	ENCFF225TLP	ARID2	E2F4	11835	10400	647	492	3.6091e-12	3.90652e-07
K562	ENCFF332ICQ	ENCFF356ASJ	ARID2	E2F5	11835	19472	840	921	0.000350238	1
K562	ENCFF332ICQ	ENCFF417DTI_ENCFF917COW	ARID2	E2F6	11835	14596	809	690	8.44296e-07	0.0913875
K562	ENCFF332ICQ	ENCFF310AGG	ARID2	E2F7	11835	3169	241	150	2.00648e-12	2.17184e-07
K562	ENCFF332ICQ	ENCFF925DJG	ARID2	E2F8	11835	12738	1612	603	6.30092e-253	6.82018e-248
K562	ENCFF332ICQ	ENCFF083YCQ	ARID2	E4F1	11835	28697	1777	1358	2.59278e-28	2.80645e-23
K562	ENCFF332ICQ	ENCFF806BDC	ARID2	EHMT2	11835	19437	1949	920	2.65588e-191	2.87475e-186
K562	ENCFF332ICQ	ENCFF502KHR	ARID2	ELF4	11835	21065	1459	997	2.52623e-43	2.73442e-38
K562	ENCFF332ICQ	ENCFF019PEL	ARID2	ELK1	11835	3967	331	187	6.24882e-22	6.76378e-17
K562	ENCFF332ICQ	ENCFF549TYR	ARID2	EP300	11835	28288	1555	1339	6.54132e-10	7.08039e-05
K562	ENCFF332ICQ	ENCFF925ANU	ARID2	EP400	11835	33534	2171	1587	1.33221e-44	1.442e-39
K562	ENCFF332ICQ	ENCFF213EPU	ARID2	ESRRA	11835	33450	2599	1583	3.20674e-121	3.47101e-116
K562	ENCFF332ICQ	ENCFF076YZO	ARID2	ETS1	11835	11558	618	547	0.000192999	1
K562	ENCFF332ICQ	ENCFF772HOY	ARID2	ETS2	11835	1762	77	83	0.0363626	1
K562	ENCFF332ICQ	ENCFF404YMX	ARID2	ETV1	11835	24198	1504	1145	6.1191e-25	6.62337e-20
K562	ENCFF332ICQ	ENCFF545VNY	ARID2	ETV6	11835	6732	386	318	2.25796e-05	1
K562	ENCFF332ICQ	ENCFF820EVZ	ARID2	EWSR1	11835	1795	73	84	0.0219449	1
K562	ENCFF332ICQ	ENCFF883WYX	ARID2	FIP1L1	11835	10793	640	510	3.51379e-09	0.000380336
K562	ENCFF332ICQ	ENCFF002CVW	ARID2	FOS	11835	7646	140	361	1.38545e-40	1.49962e-35
K562	ENCFF332ICQ	ENCFF473GCH	ARID2	FOSL1	11835	7973	312	377	5.84579e-05	1
K562	ENCFF332ICQ	ENCFF809YFY	ARID2	FOXA1	11835	1350	32	63	6.28309e-06	0.680088
K562	ENCFF332ICQ	ENCFF452SPE	ARID2	FOXJ2	11835	15441	608	730	3.25008e-07	0.0351792
K562	ENCFF332ICQ	ENCFF699ZII	ARID2	FOXM1	11835	18535	1083	877	2.06142e-12	2.2313e-07
K562	ENCFF332ICQ	ENCFF142CPK	ARID2	FUS	11835	2947	150	139	0.0213007	1
K562	ENCFF332ICQ	ENCFF833FCO	ARID2	GABPA	11835	15847	672	750	0.000229731	1
K562	ENCFF332ICQ	ENCFF517KRT	ARID2	GABPB1	11835	30655	1626	1451	3.85544e-07	0.0417317
K562	ENCFF332ICQ	ENCFF632NQI	ARID2	GATA1	11835	14605	642	691	0.00265506	1
K562	ENCFF332ICQ	ENCFF732HOE	ARID2	GATA2	11835	11622	483	550	0.000256949	1
K562	ENCFF332ICQ	ENCFF253FZN	ARID2	GATAD2A	11835	15131	1614	716	1.84799e-182	2.00029e-177
K562	ENCFF332ICQ	ENCFF549KOD	ARID2	GATAD2B	11835	13320	854	630	3.8807e-18	4.20051e-13
K562	ENCFF332ICQ	ENCFF126BCK	ARID2	GMEB1	11835	27813	2225	1316	1.7218e-115	1.86369e-110
K562	ENCFF332ICQ	ENCFF167HYX	ARID2	GTF2A2	11835	6423	257	304	0.000536612	1
K562	ENCFF332ICQ	ENCFF002CWR	ARID2	GTF2B	11835	2928	93	138	1.03007e-05	1
K562	ENCFF332ICQ	ENCFF778RMG	ARID2	GTF2E2	11835	16371	620	775	9.40198e-10	0.000101768
K562	ENCFF332ICQ	ENCFF002CYL	ARID2	GTF3C2	11835	1858	110	87	0.00230452	1
K562	ENCFF332ICQ	ENCFF474NLG	ARID2	HCFC1	11835	13559	1402	641	9.99662e-149	1.08204e-143
K562	ENCFF332ICQ	ENCFF580DYE	ARID2	HDAC3	11835	10781	545	510	0.00527964	1
K562	ENCFF332ICQ	ENCFF998HOR	ARID2	HDAC6	11835	1761	106	83	0.00207274	1
K562	ENCFF332ICQ	ENCFF939ZFS	ARID2	HDAC8	11835	9908	562	469	2.90197e-06	0.314112
K562	ENCFF332ICQ	ENCFF676NPW	ARID2	HES1	11835	11091	711	525	2.03084e-15	2.19821e-10
K562	ENCFF332ICQ	ENCFF265LKN	ARID2	HINFP	11835	8293	655	392	2.37961e-34	2.57571e-29
K562	ENCFF332ICQ	ENCFF396NSO	ARID2	HLTF	11835	12623	2325	597	0	0
K562	ENCFF332ICQ	ENCFF558DSF	ARID2	HMBOX1	11835	28923	1173	1369	4.56235e-09	0.000493833
K562	ENCFF332ICQ	ENCFF002CWT	ARID2	HMGN3	11835	14587	802	690	2.50546e-06	0.271193
K562	ENCFF332ICQ	ENCFF292JRY	ARID2	HNRNPH1	11835	315	19	14	0.0408522	1
K562	ENCFF332ICQ	ENCFF777CWV	ARID2	HNRNPK	11835	11589	280	548	4.37107e-37	4.7313e-32
K562	ENCFF332ICQ	ENCFF010STZ	ARID2	HNRNPL	11835	8012	432	379	0.000554437	1
K562	ENCFF332ICQ	ENCFF122QSN	ARID2	HNRNPLL	11835	15382	738	728	0.0137133	1
K562	ENCFF332ICQ	ENCFF768TJI	ARID2	HNRNPUL1	11835	1122	102	53	7.50941e-10	8.12826e-05
K562	ENCFF332ICQ	ENCFF835YLR	ARID2	ID3	11835	24733	1482	1170	2.34288e-19	2.53595e-14
K562	ENCFF332ICQ	ENCFF415YPX	ARID2	ILF3	11835	4762	303	225	1.1728e-07	0.0126945
K562	ENCFF332ICQ	ENCFF176NOI	ARID2	ILK	11835	2284	82	108	0.00144516	1
K562	ENCFF332ICQ	ENCFF388AJH	ARID2	IRF1	11835	17589	453	832	1.89913e-47	2.05563e-42
K562	ENCFF332ICQ	ENCFF284VUQ	ARID2	IRF1_0	11835	14592	776	690	8.30724e-05	1
K562	ENCFF332ICQ	ENCFF909LKK	ARID2	IRF1_1	11835	12543	546	593	0.00251818	1
K562	ENCFF332ICQ	ENCFF908UIY	ARID2	IRF1_2	11835	13478	641	638	0.0156447	1
K562	ENCFF332ICQ	ENCFF730RUF	ARID2	IRF1_3	11835	1479	70	70	0.047626	1
K562	ENCFF332ICQ	ENCFF384YDT	ARID2	IRF2	11835	8509	826	402	8.8805e-77	9.61234e-72
K562	ENCFF332ICQ	ENCFF196DHR	ARID2	IRF9	11835	9536	594	451	1.86116e-11	2.01454e-06
K562	ENCFF332ICQ	ENCFF629BFI	ARID2	JUN	11835	21668	1589	1025	2.49323e-60	2.6987e-55
K562	ENCFF332ICQ	ENCFF417QAJ	ARID2	JUN_0	11835	8729	342	413	3.28755e-05	1
K562	ENCFF332ICQ	ENCFF573GQX	ARID2	JUN_1	11835	4909	193	232	0.000885278	1
K562	ENCFF332ICQ	ENCFF192BTP	ARID2	JUN_2	11835	6180	214	292	2.77938e-07	0.0300842
K562	ENCFF332ICQ	ENCFF077UYM	ARID2	JUN_3	11835	9310	554	440	2.02784e-08	0.00219496
K562	ENCFF332ICQ	ENCFF426DUB	ARID2	JUNB	11835	5347	259	253	0.0230921	1
K562	ENCFF332ICQ	ENCFF337DKJ	ARID2	JUND	11835	47775	4074	2261	2.32607e-257	2.51776e-252
K562	ENCFF332ICQ	ENCFF772QPO	ARID2	KAT8	11835	2268	259	107	9.38947e-36	1.01633e-30
K562	ENCFF332ICQ	ENCFF838COI_ENCFF738WCE	ARID2	KDM1A	11835	26253	857	1242	1.06818e-31	1.15621e-26
K562	ENCFF332ICQ	ENCFF042RAK	ARID2	KDM4B	11835	8167	670	386	1.17714e-39	1.27415e-34
K562	ENCFF332ICQ	ENCFF368TYM	ARID2	KDM5B	11835	22700	855	1074	5.0353e-13	5.45026e-08
K562	ENCFF332ICQ	ENCFF962VSZ	ARID2	KHSRP	11835	5187	606	245	4.4275e-84	4.79237e-79
K562	ENCFF332ICQ	ENCFF717TWA	ARID2	KLF1	11835	11788	660	558	2.33719e-06	0.25298
K562	ENCFF332ICQ	ENCFF802XZN	ARID2	KLF13	11835	11910	1068	563	2.71751e-80	2.94146e-75
K562	ENCFF332ICQ	ENCFF844HBQ	ARID2	KLF16	11835	17908	2690	847	0	0
K562	ENCFF332ICQ	ENCFF314ULQ	ARID2	L3MBTL2	11835	53984	3036	2555	2.11843e-21	2.29301e-16
K562	ENCFF332ICQ	ENCFF511OXK	ARID2	LARP7	11835	9680	2033	458	0	0
K562	ENCFF332ICQ	ENCFF659WAF	ARID2	LEF1	11835	21936	1505	1038	1.02855e-42	1.11331e-37
K562	ENCFF332ICQ	ENCFF308IXJ	ARID2	MAFF	11835	27637	658	1308	1.72023e-88	1.86199e-83
K562	ENCFF332ICQ	ENCFF927JBT	ARID2	MAFG	11835	46186	880	2186	4.86879e-222	5.27003e-217
K562	ENCFF332ICQ	ENCFF812QPN	ARID2	MAFK	11835	26965	1114	1276	2.56612e-07	0.027776
K562	ENCFF332ICQ	ENCFF799HIG_ENCFF422NGZ	ARID2	MAX	11835	28672	2476	1357	1.66212e-163	1.7991e-158
K562	ENCFF332ICQ	ENCFF470MLY	ARID2	MBD2	11835	15555	605	736	6.55347e-08	0.00709354
K562	ENCFF332ICQ	ENCFF226CZE	ARID2	MCM2	11835	4703	669	222	6.57421e-129	7.11599e-124
K562	ENCFF332ICQ	ENCFF679ITJ	ARID2	MCM3	11835	2788	237	131	2.67016e-17	2.89021e-12
K562	ENCFF332ICQ	ENCFF920RYJ	ARID2	MCM5	11835	1736	166	82	1.33823e-16	1.44852e-11
K562	ENCFF332ICQ	ENCFF577UJR	ARID2	MEF2A	11835	1348	66	63	0.0457141	1
K562	ENCFF332ICQ	ENCFF257RYT	ARID2	MEF2D	11835	14762	827	698	1.80917e-07	0.0195827
K562	ENCFF332ICQ	ENCFF613RNG	ARID2	MEIS2	11835	53002	1628	2509	1.56796e-79	1.69717e-74
K562	ENCFF332ICQ	ENCFF670ZCR	ARID2	MGA	11835	33894	1391	1604	3.94211e-09	0.000426697
K562	ENCFF332ICQ	ENCFF365NKO	ARID2	MIER1	11835	9498	1293	449	4.43866e-230	4.80445e-225
K562	ENCFF332ICQ	ENCFF497XOD	ARID2	MITF	11835	34801	751	1647	1.46719e-135	1.5881e-130
K562	ENCFF332ICQ	ENCFF973OME_ENCFF059ONJ	ARID2	MNT	11835	17605	1162	833	9.35688e-28	1.0128e-22
K562	ENCFF332ICQ	ENCFF769GYG	ARID2	MTA1	11835	17990	1951	851	4.78996e-228	5.1847e-223
K562	ENCFF332ICQ	ENCFF350YXB	ARID2	MTA3	11835	28818	2501	1364	1.52427e-167	1.64988e-162
K562	ENCFF332ICQ	ENCFF970LCB	ARID2	MXI1	11835	9033	538	427	2.82795e-08	0.003061
K562	ENCFF332ICQ	ENCFF877ANE	ARID2	MYBL2	11835	4580	215	216	0.0271341	1
K562	ENCFF332ICQ	ENCFF465JKF	ARID2	MYC	11835	31436	2841	1488	3.37092e-213	3.64872e-208
K562	ENCFF332ICQ	ENCFF099SDW	ARID2	MYC_0	11835	21468	1809	1016	1.35533e-111	1.46702e-106
K562	ENCFF332ICQ	ENCFF634AYU	ARID2	MYC_1	11835	8915	704	422	1.5029e-36	1.62675e-31
K562	ENCFF332ICQ	ENCFF676YJE	ARID2	MYC_2	11835	37659	3950	1782	0	0
K562	ENCFF332ICQ	ENCFF387LTN	ARID2	MYC_3	11835	12479	1009	590	8.54692e-56	9.25127e-51
K562	ENCFF332ICQ	ENCFF583DZD	ARID2	MYNN	11835	15422	1753	730	2.07744e-225	2.24864e-220
K562	ENCFF332ICQ	ENCFF074EZL	ARID2	NBN	11835	20957	2896	992	0	0
K562	ENCFF332ICQ	ENCFF495CSO	ARID2	NCOA4	11835	3079	818	145	0	0
K562	ENCFF332ICQ	ENCFF322DSX	ARID2	NCOA6	11835	4645	354	219	1.33697e-17	1.44715e-12
K562	ENCFF332ICQ	ENCFF165BCW_ENCFF366UBB	ARID2	NCOR1	11835	17482	807	827	0.0110038	1
K562	ENCFF332ICQ	ENCFF002CXG	ARID2	NELFE	11835	458	27	21	0.0348943	1
K562	ENCFF332ICQ	ENCFF581YKY	ARID2	NEUROD1	11835	14353	1205	679	2.05575e-74	2.22517e-69
K562	ENCFF332ICQ	ENCFF495MHZ	ARID2	NFE2	11835	30144	1017	1427	4.36765e-31	4.72759e-26
K562	ENCFF332ICQ	ENCFF175IUO	ARID2	NFE2L1	11835	7430	198	351	1.72362e-19	1.86566e-14
K562	ENCFF332ICQ	ENCFF370ENX	ARID2	NFIC	11835	48576	1733	2299	7.58475e-36	8.20981e-31
K562	ENCFF332ICQ	ENCFF157UUF	ARID2	NFRKB	11835	22856	1726	1082	4.0913e-73	4.42846e-68
K562	ENCFF332ICQ	ENCFF986MHU	ARID2	NFXL1	11835	6160	844	291	9.89013e-153	1.07052e-147
K562	ENCFF332ICQ	ENCFF012VES	ARID2	NFYA	11835	4382	47	207	3.45924e-41	3.74432e-36
K562	ENCFF332ICQ	ENCFF113PMT	ARID2	NFYB	11835	8952	77	423	2.28942e-95	2.4781e-90
K562	ENCFF332ICQ	ENCFF906PGD	ARID2	NKRF	11835	18069	2163	855	1.27644e-306	1.38164e-301
K562	ENCFF332ICQ	ENCFF776YPS	ARID2	NONO	11835	12558	1139	594	5.3131e-88	5.75096e-83
K562	ENCFF332ICQ	ENCFF954NAJ	ARID2	NR0B1	11835	405	26	19	0.0245685	1
K562	ENCFF332ICQ	ENCFF664ZGR	ARID2	NR2C1	11835	15500	819	733	0.00010819	1
K562	ENCFF332ICQ	ENCFF594LCH	ARID2	NR2C2	11835	634	19	30	0.00894077	1
K562	ENCFF332ICQ	ENCFF175IIE	ARID2	NR2F1	11835	37884	1903	1793	0.000334843	1
K562	ENCFF332ICQ	ENCFF255EOB	ARID2	NR2F2	11835	21050	1162	996	2.33879e-08	0.00253152
K562	ENCFF332ICQ	ENCFF712AXK	ARID2	NR2F6	11835	23333	940	1104	3.47344e-08	0.00375968
K562	ENCFF332ICQ	ENCFF859NPS	ARID2	NR4A1	11835	20688	1174	979	1.38677e-10	1.50105e-05
K562	ENCFF332ICQ	ENCFF144PPR_ENCFF493ABN	ARID2	NRF1	11835	17306	725	819	5.40485e-05	1
K562	ENCFF332ICQ	ENCFF289BUU	ARID2	NUFIP1	11835	3572	417	169	2.67798e-58	2.89867e-53
K562	ENCFF332ICQ	ENCFF168HAG	ARID2	PBX2	11835	36719	1174	1738	1.4192e-47	1.53616e-42
K562	ENCFF332ICQ	ENCFF941RVL	ARID2	PCBP1	11835	10920	439	516	4.46905e-05	1
K562	ENCFF332ICQ	ENCFF881XQF	ARID2	PCBP2	11835	2539	64	120	7.06066e-09	0.000764252
K562	ENCFF332ICQ	ENCFF462FRU	ARID2	PHB2	11835	7367	1180	348	4.37206e-267	4.73237e-262
K562	ENCFF332ICQ	ENCFF948YVM	ARID2	PHF20	11835	15696	1290	743	3.30759e-74	3.58017e-69
K562	ENCFF332ICQ	ENCFF134CUM	ARID2	PHF21A	11835	8976	1075	424	2.91794e-154	3.15841e-149
K562	ENCFF332ICQ	ENCFF626KTJ	ARID2	PHF8	11835	29046	985	1375	2.64715e-29	2.8653e-24
K562	ENCFF332ICQ	ENCFF544XKC	ARID2	PKNOX1	11835	52588	1898	2489	5.53038e-36	5.98614e-31
K562	ENCFF332ICQ	ENCFF881QBT	ARID2	PML	11835	21322	880	1009	2.42167e-06	0.262124
K562	ENCFF332ICQ	ENCFF662YQK	ARID2	POLR2A_0	11835	19534	597	924	2.80581e-31	3.03703e-26
K562	ENCFF332ICQ	ENCFF853ZMA	ARID2	POLR2A_1	11835	22578	626	1068	2.98178e-49	3.22751e-44
K562	ENCFF332ICQ	ENCFF206YXX	ARID2	POLR2A_2	11835	19284	611	912	5.90008e-27	6.38631e-22
K562	ENCFF332ICQ	ENCFF270QAB	ARID2	POLR2A_3	11835	23423	705	1108	3.83082e-39	4.14652e-34
K562	ENCFF332ICQ	ENCFF296CNQ	ARID2	POLR2AphosphoS2	11835	10069	407	476	0.00010252	1
K562	ENCFF332ICQ	ENCFF542DOG	ARID2	POLR2AphosphoS5	11835	30324	1009	1435	2.67215e-33	2.89236e-28
K562	ENCFF332ICQ	ENCFF872JJJ	ARID2	POLR2B	11835	20684	1235	979	4.38901e-16	4.75071e-11
K562	ENCFF332ICQ	ENCFF273EYJ	ARID2	POLR2G	11835	58571	1316	2772	3.04526e-209	3.29622e-204
K562	ENCFF332ICQ	ENCFF801YZV	ARID2	POLR2H	11835	23424	677	1108	7.07179e-45	7.65458e-40
K562	ENCFF332ICQ	ENCFF002CXW	ARID2	POLR3A	11835	1310	48	62	0.0103427	1
K562	ENCFF332ICQ	ENCFF002CXT	ARID2	POLR3G	11835	207	4	9	0.0337372	1
K562	ENCFF332ICQ	ENCFF990CFV	ARID2	POU5F1	11835	2219	172	105	5.18003e-10	5.60692e-05
K562	ENCFF332ICQ	ENCFF294HEI	ARID2	PRDM10	11835	29758	1351	1408	0.00336961	1
K562	ENCFF332ICQ	ENCFF785ACI	ARID2	PRPF4	11835	6788	298	321	0.00993025	1
K562	ENCFF332ICQ	ENCFF694BIA	ARID2	PTBP1	11835	5027	350	237	1.38725e-12	1.50157e-07
K562	ENCFF332ICQ	ENCFF007DKB	ARID2	PTRF	11835	5154	184	243	1.17491e-05	1
K562	ENCFF332ICQ	ENCFF332DRG	ARID2	PTTG1	11835	5547	150	262	1.59642e-14	1.72798e-09
K562	ENCFF332ICQ	ENCFF421KIV	ARID2	PYGO2	11835	4223	772	199	3.03258e-208	3.28249e-203
K562	ENCFF332ICQ	ENCFF002CXU	ARID2	RAD21	11835	17627	6257	834	0	0
K562	ENCFF332ICQ	ENCFF096XMD	ARID2	RAD51	11835	17974	986	850	4.09644e-07	0.0443403
K562	ENCFF332ICQ	ENCFF975IRM	ARID2	RB1	11835	25768	4144	1219	0	0
K562	ENCFF332ICQ	ENCFF379MPS	ARID2	RBBP5	11835	24338	984	1152	3.19864e-08	0.00346224
K562	ENCFF332ICQ	ENCFF120IDE	ARID2	RBFOX2	11835	56370	1544	2668	4.15963e-124	4.50242e-119
K562	ENCFF332ICQ	ENCFF682SIY	ARID2	RBM14	11835	3099	194	146	2.25879e-05	1
K562	ENCFF332ICQ	ENCFF971VJZ	ARID2	RBM15	11835	400	31	18	0.00151749	1
K562	ENCFF332ICQ	ENCFF861YKK	ARID2	RBM17	11835	47	4	2	0.0902235	1
K562	ENCFF332ICQ	ENCFF522JUV	ARID2	RBM22	11835	13050	441	617	1.44917e-14	1.5686e-09
K562	ENCFF332ICQ	ENCFF680WBN	ARID2	RBM25	11835	49721	424	2353	0	0
K562	ENCFF332ICQ	ENCFF782GWS	ARID2	RBM34	11835	1085	36	51	0.00566204	1
K562	ENCFF332ICQ	ENCFF209JJD	ARID2	RBM39	11835	2747	416	130	2.27566e-88	2.4632e-83
K562	ENCFF332ICQ	ENCFF484CKD	ARID2	RCOR1	11835	6822	562	322	3.31012e-34	3.58291e-29
K562	ENCFF332ICQ	ENCFF580QGA	ARID2	RELA	11835	10319	543	488	0.000861581	1
K562	ENCFF332ICQ	ENCFF237UAN_ENCFF010UHD	ARID2	RFX1	11835	13929	205	659	1.72636e-95	1.86862e-90
K562	ENCFF332ICQ	ENCFF716LRI	ARID2	RFX5	11835	2725	162	129	0.000633502	1
K562	ENCFF332ICQ	ENCFF209HKW	ARID2	RLF	11835	10587	1065	501	1.69486e-106	1.83454e-101
K562	ENCFF332ICQ	ENCFF478MPX	ARID2	SAFB	11835	5923	343	280	2.90423e-05	1
K562	ENCFF332ICQ	ENCFF624NUZ	ARID2	SAFB2	11835	82	0	3	0.0497871	1
K562	ENCFF332ICQ	ENCFF718NUA	ARID2	SAP30	11835	14058	659	665	0.0151224	1
K562	ENCFF332ICQ	ENCFF294EHN	ARID2	SETDB1	11835	4113	167	194	0.00429163	1
K562	ENCFF332ICQ	ENCFF757ODD	ARID2	SFPQ	11835	228	15	10	0.0347181	1
K562	ENCFF332ICQ	ENCFF191MPD	ARID2	SIN3A	11835	13459	663	637	0.00917761	1
K562	ENCFF332ICQ	ENCFF280GTU	ARID2	SIN3B	11835	10501	760	497	1.55751e-28	1.68586e-23
K562	ENCFF332ICQ	ENCFF002CXZ	ARID2	SIRT6	11835	2305	140	109	0.000592245	1
K562	ENCFF332ICQ	ENCFF033EBX_ENCFF002CMM	ARID2	SIX5	11835	3194	58	151	2.69789e-18	2.92023e-13
K562	ENCFF332ICQ	ENCFF481WGW	ARID2	SKIL	11835	24313	3046	1150	0	0
K562	ENCFF332ICQ	ENCFF315YAF	ARID2	SMAD1	11835	8855	532	419	1.3997e-08	0.00151505
K562	ENCFF332ICQ	ENCFF011KRN	ARID2	SMAD2	11835	200	39	9	9.93625e-14	1.07551e-08
K562	ENCFF332ICQ	ENCFF178MOP	ARID2	SMAD5	11835	22325	703	1056	1.2519e-31	1.35507e-26
K562	ENCFF332ICQ	ENCFF995NIE	ARID2	SMARCA5	11835	19278	2102	912	3.05633e-248	3.3082e-243
K562	ENCFF332ICQ	ENCFF944GJH	ARID2	SMARCB1	11835	3079	217	145	5.09109e-09	0.000551064
K562	ENCFF332ICQ	ENCFF114PTZ	ARID2	SMARCC2	11835	19106	1360	904	7.05583e-46	7.6373e-41
K562	ENCFF332ICQ	ENCFF622RBW	ARID2	SMARCE1	11835	36356	2411	1721	3.65757e-56	3.95899e-51
K562	ENCFF332ICQ	ENCFF041YQC	ARID2	SMC3	11835	26872	6822	1272	0	0
K562	ENCFF332ICQ	ENCFF494ZUY	ARID2	SNIP1	11835	3268	669	154	1.23336e-205	1.335e-200
K562	ENCFF332ICQ	ENCFF033KXY	ARID2	SNRNP70	11835	882	67	41	4.88085e-05	1
K562	ENCFF332ICQ	ENCFF241TBP	ARID2	SOX6	11835	37311	2729	1766	1.96088e-100	2.12247e-95
K562	ENCFF332ICQ	ENCFF300XUA	ARID2	SP1	11835	14898	713	705	0.0142783	1
K562	ENCFF332ICQ	ENCFF002CMJ	ARID2	SPI1	11835	28677	874	1357	2.28914e-45	2.47779e-40
K562	ENCFF332ICQ	ENCFF985TSH	ARID2	SREBF1	11835	2865	247	135	1.74458e-18	1.88835e-13
K562	ENCFF332ICQ	ENCFF798URE	ARID2	SRSF1	11835	1170	83	55	9.28543e-05	1
K562	ENCFF332ICQ	ENCFF722XRW	ARID2	SRSF3	11835	1984	149	93	2.1566e-08	0.00233433
K562	ENCFF332ICQ	ENCFF059WVE	ARID2	SRSF7	11835	208	11	9	0.0970201	1
K562	ENCFF332ICQ	ENCFF137IBM	ARID2	SRSF9	11835	29	0	1	0.367879	1
K562	ENCFF332ICQ	ENCFF290HTJ	ARID2	STAT1_0	11835	1337	82	63	0.00322364	1
K562	ENCFF332ICQ	ENCFF254MPF	ARID2	STAT1_1	11835	1283	75	60	0.00811079	1
K562	ENCFF332ICQ	ENCFF498DOQ	ARID2	STAT1_2	11835	957	40	45	0.0471633	1
K562	ENCFF332ICQ	ENCFF648NYF	ARID2	STAT1_3	11835	2831	271	134	9.84824e-26	1.06598e-20
K562	ENCFF332ICQ	ENCFF841YFF	ARID2	STAT2_0	11835	2097	118	99	0.00659377	1
K562	ENCFF332ICQ	ENCFF714VIT	ARID2	STAT2_1	11835	3606	226	170	6.2681e-06	0.678465
K562	ENCFF332ICQ	ENCFF696KPD	ARID2	STAT5A	11835	13378	575	633	0.00107166	1
K562	ENCFF332ICQ	ENCFF484HCG	ARID2	SUPT5H	11835	29659	1372	1404	0.00745786	1
K562	ENCFF332ICQ	ENCFF822FWM	ARID2	TAF1	11835	19025	822	900	0.00042773	1
K562	ENCFF332ICQ	ENCFF617CAZ	ARID2	TAF15	11835	787	58	37	0.000327818	1
K562	ENCFF332ICQ	ENCFF034CQR	ARID2	TAF7	11835	648	52	30	7.49588e-05	1
K562	ENCFF332ICQ	ENCFF785HXY	ARID2	TAF9B	11835	15392	811	728	0.000146364	1
K562	ENCFF332ICQ	ENCFF284LRP_ENCFF482CEV	ARID2	TAL1	11835	19046	440	901	1.06924e-65	1.15736e-60
K562	ENCFF332ICQ	ENCFF626MVT	ARID2	TBL1XR1	11835	15770	1300	746	1.19446e-75	1.29289e-70
K562	ENCFF332ICQ	ENCFF380FJL	ARID2	TBP	11835	21570	1180	1021	8.85866e-08	0.0095887
K562	ENCFF332ICQ	ENCFF249EZR	ARID2	TCF7	11835	5844	538	276	1.17173e-44	1.26829e-39
K562	ENCFF332ICQ	ENCFF312RFN	ARID2	TCF7L2	11835	2119	139	100	3.86874e-05	1
K562	ENCFF332ICQ	ENCFF619BDC	ARID2	TEAD2	11835	6623	480	313	4.49656e-19	4.86712e-14
K562	ENCFF332ICQ	ENCFF209MQX	ARID2	TEAD4	11835	35771	2197	1693	1.4897e-32	1.61247e-27
K562	ENCFF332ICQ	ENCFF701MXF	ARID2	TFDP1	11835	22661	762	1072	3.07138e-24	3.3245e-19
K562	ENCFF332ICQ	ENCFF641LJY	ARID2	THAP1	11835	5972	357	282	2.15248e-06	0.232987
K562	ENCFF332ICQ	ENCFF671BFH	ARID2	THRA	11835	1757	65	83	0.0059883	1
K562	ENCFF332ICQ	ENCFF294VWT	ARID2	THRAP3	11835	4904	623	232	5.56816e-100	6.02703e-95
K562	ENCFF332ICQ	ENCFF262BVP	ARID2	TOE1	11835	19775	1853	936	4.13037e-154	4.47075e-149
K562	ENCFF332ICQ	ENCFF049CRW_ENCFF646VQW	ARID2	TRIM24	11835	15621	820	739	0.000191819	1
K562	ENCFF332ICQ	ENCFF561IZB	ARID2	TRIP13	11835	2520	561	119	2.50153e-188	2.70768e-183
K562	ENCFF332ICQ	ENCFF036YVI	ARID2	TSC22D4	11835	3352	277	158	3.3243e-18	3.59825e-13
K562	ENCFF332ICQ	ENCFF730URE	ARID2	U2AF1	11835	4352	238	206	0.00242647	1
K562	ENCFF332ICQ	ENCFF398EQF	ARID2	U2AF2	11835	137	2	6	0.0446175	1
K562	ENCFF332ICQ	ENCFF671DOL	ARID2	UBTF	11835	19212	1293	909	8.7171e-34	9.43548e-29
K562	ENCFF332ICQ	ENCFF334FMW	ARID2	USF1	11835	21340	630	1010	2.02861e-38	2.19579e-33
K562	ENCFF332ICQ	ENCFF150VTD	ARID2	USF2	11835	3664	143	173	0.00209746	1
K562	ENCFF332ICQ	ENCFF186QUP	ARID2	VEZF1	11835	46383	2461	2195	1.48715e-09	0.000160971
K562	ENCFF332ICQ	ENCFF803LEC	ARID2	XRCC3	11835	1986	45	94	7.74926e-09	0.000838788
K562	ENCFF332ICQ	ENCFF998KKJ	ARID2	XRCC5	11835	13253	2642	627	0	0
K562	ENCFF332ICQ	ENCFF706LIT	ARID2	YBX1	11835	1358	392	64	1.6113e-168	1.74409e-163
K562	ENCFF332ICQ	ENCFF246HIU	ARID2	YBX3	11835	2680	665	126	6.98536e-249	7.56103e-244
K562	ENCFF332ICQ	ENCFF926FUM_ENCFF328XKC	ARID2	YY1	11835	12127	1115	574	3.20507e-89	3.4692e-84
K562	ENCFF332ICQ	ENCFF253FON	ARID2	ZBED1	11835	5913	427	279	4.38013e-17	4.74109e-12
K562	ENCFF332ICQ	ENCFF434QZL	ARID2	ZBTB11	11835	7250	265	343	1.61052e-06	0.174324
K562	ENCFF332ICQ	ENCFF561USY	ARID2	ZBTB2	11835	18423	1996	872	1.77126e-232	1.91723e-227
K562	ENCFF332ICQ	ENCFF408FQC	ARID2	ZBTB33	11835	60931	949	2884	0	0
K562	ENCFF332ICQ	ENCFF417LEJ	ARID2	ZBTB40	11835	29759	1672	1408	7.1714e-13	7.76239e-08
K562	ENCFF332ICQ	ENCFF706ISJ	ARID2	ZBTB7A	11835	30583	1961	1447	2.05232e-38	2.22145e-33
K562	ENCFF332ICQ	ENCFF589EVD	ARID2	ZBTB8A	11835	955	58	45	0.00937352	1
K562	ENCFF332ICQ	ENCFF522JRK	ARID2	ZC3H11A	11835	2624	434	124	6.13536e-104	6.64097e-99
K562	ENCFF332ICQ	ENCFF809OEX	ARID2	ZC3H8	11835	12691	2757	600	0	0
K562	ENCFF332ICQ	ENCFF521CRG	ARID2	ZFP36	11835	23635	1114	1118	0.0118665	1
K562	ENCFF332ICQ	ENCFF396DNK	ARID2	ZFP91	11835	14258	904	674	5.53098e-18	5.98679e-13
K562	ENCFF332ICQ	ENCFF433RKB	ARID2	ZFX	11835	27044	954	1280	2.09054e-22	2.26282e-17
K562	ENCFF332ICQ	ENCFF195ODE	ARID2	ZHX1	11835	3453	537	163	4.07891e-118	4.41505e-113
K562	ENCFF332ICQ	ENCFF163VUK	ARID2	ZKSCAN1	11835	14153	1173	670	1.64259e-69	1.77796e-64
K562	ENCFF332ICQ	ENCFF529FWJ	ARID2	ZKSCAN8	11835	11311	402	535	2.73456e-10	2.95992e-05
K562	ENCFF332ICQ	ENCFF597DIY	ARID2	ZMIZ1	11835	1049	152	49	3.24833e-32	3.51603e-27
K562	ENCFF332ICQ	ENCFF511QHY	ARID2	ZMYM3	11835	39230	404	1857	0	0
K562	ENCFF332ICQ	ENCFF114IWY	ARID2	ZNF143	11835	29873	5853	1414	0	0
K562	ENCFF332ICQ	ENCFF116DIO	ARID2	ZNF148	11835	22956	928	1086	7.31349e-08	0.0079162
K562	ENCFF332ICQ	ENCFF721LDD	ARID2	ZNF175	11835	18917	625	895	2.55734e-22	2.76809e-17
K562	ENCFF332ICQ	ENCFF853TZC	ARID2	ZNF197	11835	10450	509	494	0.0141112	1
K562	ENCFF332ICQ	ENCFF891MVM	ARID2	ZNF263	11835	3994	195	189	0.0259882	1
K562	ENCFF332ICQ	ENCFF344QKL	ARID2	ZNF274	11835	3064	99	145	1.07827e-05	1
K562	ENCFF332ICQ	ENCFF386WKY	ARID2	ZNF280A	11835	6438	437	304	1.46933e-13	1.59042e-08
K562	ENCFF332ICQ	ENCFF581ZZT	ARID2	ZNF282	11835	12961	977	613	2.57639e-42	2.78871e-37
K562	ENCFF332ICQ	ENCFF921WMN	ARID2	ZNF318	11835	10963	833	518	1.20979e-37	1.30949e-32
K562	ENCFF332ICQ	ENCFF744SVC	ARID2	ZNF354B	11835	4779	51	226	5.22796e-45	5.6588e-40
K562	ENCFF332ICQ	ENCFF706SJZ	ARID2	ZNF384	11835	19825	2004	938	1.58243e-200	1.71283e-195
K562	ENCFF332ICQ	ENCFF388YOB	ARID2	ZNF395	11835	25387	882	1201	6.94761e-23	7.52016e-18
K562	ENCFF332ICQ	ENCFF834WGJ	ARID2	ZNF507	11835	11748	19	556	4.01416e-207	4.34496e-202
K562	ENCFF332ICQ	ENCFF447QUG	ARID2	ZNF512	11835	23246	678	1100	2.53209e-43	2.74076e-38
K562	ENCFF332ICQ	ENCFF815TTY	ARID2	ZNF584	11835	15035	445	711	2.07054e-27	2.24118e-22
K562	ENCFF332ICQ	ENCFF602AXP	ARID2	ZNF589	11835	21343	770	1010	4.53463e-16	4.90832e-11
K562	ENCFF332ICQ	ENCFF273TYA	ARID2	ZNF592	11835	35259	1935	1669	1.60405e-11	1.73624e-06
K562	ENCFF332ICQ	ENCFF173NRW	ARID2	ZNF644	11835	12705	497	601	1.25176e-06	0.135492
K562	ENCFF332ICQ	ENCFF248AOD	ARID2	ZNF766	11835	26482	997	1253	7.59073e-15	8.21629e-10
K562	ENCFF332ICQ	ENCFF654BMD	ARID2	ZNF83	11835	11272	502	533	0.00709823	1
K562	ENCFF332ICQ	ENCFF996IVU	ARID2	ZNF830	11835	3460	202	163	0.000368519	1
K562	ENCFF332ICQ	ENCFF253NXR	ARID2	ZSCAN29	11835	17315	1505	819	1.72971e-102	1.87225e-97
K562	ENCFF332ICQ	ENCFF588OLK	ARID2	ZZZ3	11835	3029	344	143	3.05639e-46	3.30827e-41
K562	ENCFF835KAT	ENCFF836VRV	ARID3A	2001-08-01	11550	11428	184	527	3.90815e-67	4.23022e-62
K562	ENCFF835KAT	ENCFF396GUH	ARID3A	ADNP	11550	21217	1397	980	1.07779e-36	1.16661e-31
K562	ENCFF835KAT	ENCFF360BTO	ARID3A	AFF1	11550	20613	3331	952	0	0
K562	ENCFF835KAT	ENCFF010MMQ	ARID3A	ARHGAP35	11550	5027	174	232	1.07322e-05	1
K562	ENCFF835KAT	ENCFF225MPC	ARID3A	ARID1B	11550	50204	6493	2319	0	0
K562	ENCFF835KAT	ENCFF332ICQ	ARID3A	ARID2	11550	11835	1229	546	4.26314e-139	4.61447e-134
K562	ENCFF835KAT	ENCFF835KAT	ARID3A	ARID3A	11550	11550	11550	533	0	0
K562	ENCFF835KAT	ENCFF235ZZP	ARID3A	ASH1L	11550	8152	887	376	2.72117e-111	2.94542e-106
K562	ENCFF835KAT	ENCFF002CVM	ARID3A	ATF1	11550	14864	3634	686	0	0
K562	ENCFF835KAT	ENCFF968KBN	ARID3A	ATF2	11550	46506	2307	2148	2.65748e-05	1
K562	ENCFF835KAT	ENCFF958KNK	ARID3A	ATF3	11550	59815	4370	2763	4.19258e-175	4.53809e-170
K562	ENCFF835KAT	ENCFF710IEF	ARID3A	ATF4	11550	42275	2172	1953	6.14747e-08	0.00665408
K562	ENCFF835KAT	ENCFF868QLL	ARID3A	ATF7	11550	47113	5567	2176	0	0
K562	ENCFF835KAT	ENCFF423EMU	ARID3A	BACH1	11550	4708	969	217	9.52584e-306	1.03109e-300
K562	ENCFF835KAT	ENCFF057ZUY	ARID3A	BCOR	11550	44533	2675	2057	1.23545e-39	1.33727e-34
K562	ENCFF835KAT	ENCFF002CVP	ARID3A	BDP1	11550	570	142	26	1.59934e-56	1.73114e-51
K562	ENCFF835KAT	ENCFF179NDS	ARID3A	BHLHE40	11550	27327	3581	1262	0	0
K562	ENCFF835KAT	ENCFF048OIZ	ARID3A	BMI1	11550	2818	293	130	5.63045e-35	6.09445e-30
K562	ENCFF835KAT	ENCFF549GMO	ARID3A	BRCA1	11550	951	7	43	1.14074e-11	1.23475e-06
K562	ENCFF835KAT	ENCFF714XHL	ARID3A	BRD4	11550	8192	588	378	3.88429e-24	4.20439e-19
K562	ENCFF835KAT	ENCFF666LZV	ARID3A	BRD9	11550	18855	2915	871	0	0
K562	ENCFF835KAT	ENCFF002CVR	ARID3A	BRF1	11550	221	94	10	4.17522e-57	4.5193e-52
K562	ENCFF835KAT	ENCFF002CVS	ARID3A	BRF2	11550	1087	50	50	0.056325	1
K562	ENCFF835KAT	ENCFF996ZGL	ARID3A	C11orf30	11550	61206	3175	2827	8.08364e-12	8.74981e-07
K562	ENCFF835KAT	ENCFF642BNC	ARID3A	CBFA2T2	11550	32296	4513	1492	0	0
[truncated: 106,242 more rows]
