# Supplementary material for: Integrating Peak Colocalization and Motif Enrichment Analysis for the Discovery of Genome-Wide Regulatory Modules and Transcription Factor Recruitment Rules
Source: Front Genet. 2020 Feb 21;11:72. doi: 10.3389/fgene.2020.00072 (PMC7046753; doi:10.3389/fgene.2020.00072)
Supplement: Supplementary Table 3 — Results of the peak/summit overlap step between all pairs of ENCODE datasets in the K562 cell line within NF-YB peaks. [file Table_3.xlsx]

## Sheet: Base TF NFYB
Base TF	TF_exp_A	TF_exp_B	TF_name_A	TF_name_B	NFYB peaks	TF_A_peaks_in_FOS	TF_B_peaks_in_FOS	Co binding peaks in NFYB	expected value	p-value Poisson	Corrected p-value
NFYB	ENCFF836VRV	ENCFF836VRV	37104	37104	8952	401	401	401	17.9626	0	0
NFYB	ENCFF836VRV	ENCFF396GUH	37104	ADNP	8952	401	127	1	5.6889	0.0192474	1
NFYB	ENCFF836VRV	ENCFF360BTO	37104	AFF1	8952	401	543	30	24.3234	0.0392237	1
NFYB	ENCFF836VRV	ENCFF010MMQ	37104	ARHGAP35	8952	401	85	12	3.80753	0.000430321	1
NFYB	ENCFF836VRV	ENCFF225MPC	37104	ARID1B	8952	401	675	34	30.2363	0.054494	1
NFYB	ENCFF836VRV	ENCFF332ICQ	37104	ARID2	8952	401	79	5	3.53876	0.134342	1
NFYB	ENCFF836VRV	ENCFF835KAT	37104	ARID3A	8952	401	570	29	25.5328	0.0589609	1
NFYB	ENCFF836VRV	ENCFF235ZZP	37104	ASH1L	8952	401	2325	171	104.147	4.9361e-10	5.34289e-05
NFYB	ENCFF836VRV	ENCFF002CVM	37104	ATF1	8952	401	1593	139	71.3576	4.51843e-13	4.8908e-08
NFYB	ENCFF836VRV	ENCFF968KBN	37104	ATF2	8952	401	826	64	37.0002	1.55836e-05	1
NFYB	ENCFF836VRV	ENCFF958KNK	37104	ATF3	8952	401	1033	65	46.2727	0.00171318	1
NFYB	ENCFF836VRV	ENCFF710IEF	37104	ATF4	8952	401	426	21	19.0824	0.0789896	1
NFYB	ENCFF836VRV	ENCFF868QLL	37104	ATF7	8952	401	2939	290	131.651	4.75584e-33	5.14777e-28
NFYB	ENCFF836VRV	ENCFF423EMU	37104	BACH1	8952	401	116	11	5.19616	0.010344	1
NFYB	ENCFF836VRV	ENCFF057ZUY	37104	BCOR	8952	401	382	24	17.1115	0.0237015	1
NFYB	ENCFF836VRV	ENCFF002CVP	37104	BDP1	8952	401	13	1	0.582328	0.325286	1
NFYB	ENCFF836VRV	ENCFF179NDS	37104	BHLHE40	8952	401	1665	176	74.5828	7.88937e-24	8.53953e-19
NFYB	ENCFF836VRV	ENCFF048OIZ	37104	BMI1	8952	401	278	31	12.4529	4.26689e-06	0.461853
NFYB	ENCFF836VRV	ENCFF549GMO	37104	BRCA1	8952	401	1	0	0.0447945	0.956194	1
NFYB	ENCFF836VRV	ENCFF714XHL	37104	BRD4	8952	401	160	21	7.16711	1.38436e-05	1
NFYB	ENCFF836VRV	ENCFF666LZV	37104	BRD9	8952	401	305	24	13.6623	0.00336053	1
NFYB	ENCFF836VRV	ENCFF002CVR	37104	BRF1	8952	401	10	1	0.447945	0.28621	1
NFYB	ENCFF836VRV	ENCFF002CVS	37104	BRF2	8952	401	7	2	0.313561	0.0359283	1
NFYB	ENCFF836VRV	ENCFF996ZGL	37104	C11orf30	8952	401	1723	151	77.1809	3.62124e-14	3.91966e-09
NFYB	ENCFF836VRV	ENCFF642BNC	37104	CBFA2T2	8952	401	1271	53	56.9338	0.0476059	1
NFYB	ENCFF836VRV	ENCFF993GXU	37104	CBFA2T3	8952	401	635	38	28.4445	0.0151399	1
NFYB	ENCFF836VRV	ENCFF484DKT	37104	CBX1	8952	401	963	139	43.1371	3.36558e-31	3.64294e-26
NFYB	ENCFF836VRV	ENCFF455TDM	37104	CBX3	8952	401	1458	134	65.3103	3.50072e-14	3.78921e-09
NFYB	ENCFF836VRV	ENCFF062ARS	37104	CBX5	8952	401	211	23	9.45163	8.30558e-05	1
NFYB	ENCFF836VRV	ENCFF456PQY	37104	CBX8	8952	401	3	0	0.134383	0.874255	1
NFYB	ENCFF836VRV	ENCFF874QUM	37104	CC2D1A	8952	401	1405	60	62.9362	0.0479746	1
NFYB	ENCFF836VRV	ENCFF583GKE	37104	CCAR2	8952	401	26	0	1.16466	0.31203	1
NFYB	ENCFF836VRV	ENCFF002CVU	37104	CCNT2	8952	401	1787	275	80.0477	4.49018e-65	4.86022e-60
NFYB	ENCFF836VRV	ENCFF643TEZ	37104	CDC5L	8952	401	74	3	3.31479	0.220608	1
NFYB	ENCFF836VRV	ENCFF813LOW_ENCFF429XKT	37104	CEBPB	8952	401	594	43	26.6079	0.000868255	1
NFYB	ENCFF836VRV	ENCFF925MHB	37104	CEBPZ	8952	401	593	54	26.5631	1.02691e-06	0.111154
NFYB	ENCFF836VRV	ENCFF859FVX	37104	CHAMP1	8952	401	684	24	30.6394	0.0372818	1
NFYB	ENCFF836VRV	ENCFF684MLP	37104	COPS2	8952	401	11	1	0.492739	0.301039	1
NFYB	ENCFF836VRV	ENCFF665FHC	37104	CREB3	8952	401	330	19	14.7822	0.0524948	1
NFYB	ENCFF836VRV	ENCFF582YPB	37104	CREB3L1	8952	401	1553	171	69.5658	5.5444e-25	6.00132e-20
NFYB	ENCFF836VRV	ENCFF948TXN	37104	CREM	8952	401	3223	316	144.373	2.42006e-35	2.6195e-30
NFYB	ENCFF836VRV	ENCFF117EWO	37104	CSDE1	8952	401	467	48	20.919	1.61085e-07	0.017436
NFYB	ENCFF836VRV	ENCFF152VMJ	37104	CTBP1	8952	401	2152	231	96.3977	1.58856e-31	1.71947e-26
NFYB	ENCFF836VRV	ENCFF002DDJ_ENCFF002DBD	37104	CTCF	8952	401	445	51	19.9335	2.69855e-09	0.000292094
NFYB	ENCFF836VRV	ENCFF962FQM	37104	CTCFL	8952	401	434	66	19.4408	7.52006e-17	8.13979e-12
NFYB	ENCFF836VRV	ENCFF517YCC	37104	CUX1	8952	401	205	8	9.18286	0.128895	1
NFYB	ENCFF836VRV	ENCFF526HLP	37104	DACH1	8952	401	492	53	22.0389	9.69957e-09	0.00104989
NFYB	ENCFF836VRV	ENCFF338HQY	37104	DDX20	8952	401	2080	189	93.1725	1.05666e-18	1.14374e-13
NFYB	ENCFF836VRV	ENCFF786WZD	37104	DEAF1	8952	401	775	68	34.7157	1.92518e-07	0.0208383
NFYB	ENCFF836VRV	ENCFF408SNO	37104	DIDO1	8952	401	566	58	25.3537	1.12781e-08	0.00122075
NFYB	ENCFF836VRV	ENCFF034PQD	37104	DNMT1	8952	401	43	2	1.92616	0.270293	1
NFYB	ENCFF836VRV	ENCFF774QKS_ENCFF823SYE	37104	DPF2	8952	401	347	9	15.5437	0.0259231	1
NFYB	ENCFF836VRV	ENCFF106DAY	37104	E2F1	8952	401	2426	208	108.671	8.59709e-18	9.30558e-13
NFYB	ENCFF836VRV	ENCFF225TLP	37104	E2F4	8952	401	1863	242	83.4521	2.34322e-45	2.53633e-40
NFYB	ENCFF836VRV	ENCFF356ASJ	37104	E2F5	8952	401	1026	110	45.9591	5.01389e-16	5.42708e-11
NFYB	ENCFF836VRV	ENCFF417DTI_ENCFF917COW	37104	E2F6	8952	401	1561	190	69.9242	1.33538e-32	1.44543e-27
NFYB	ENCFF836VRV	ENCFF310AGG	37104	E2F7	8952	401	371	59	16.6187	4.52733e-16	4.90042e-11
NFYB	ENCFF836VRV	ENCFF925DJG	37104	E2F8	8952	401	1153	159	51.648	2.99048e-33	3.23692e-28
NFYB	ENCFF836VRV	ENCFF083YCQ	37104	E4F1	8952	401	2631	210	117.854	5.94922e-15	6.43949e-10
NFYB	ENCFF836VRV	ENCFF806BDC	37104	EHMT2	8952	401	463	11	20.7398	0.007525	1
NFYB	ENCFF836VRV	ENCFF502KHR	37104	ELF4	8952	401	1900	141	85.1095	7.69096e-09	0.000832477
NFYB	ENCFF836VRV	ENCFF019PEL	37104	ELK1	8952	401	476	72	21.3222	4.2536e-18	4.60414e-13
NFYB	ENCFF836VRV	ENCFF549TYR	37104	EP300	8952	401	1149	100	51.4688	6.78889e-10	7.34836e-05
NFYB	ENCFF836VRV	ENCFF925ANU	37104	EP400	8952	401	1839	199	82.377	7.47584e-28	8.09192e-23
NFYB	ENCFF836VRV	ENCFF213EPU	37104	ESRRA	8952	401	1586	188	71.044	6.34555e-31	6.86849e-26
NFYB	ENCFF836VRV	ENCFF076YZO	37104	ETS1	8952	401	976	146	43.7194	3.02896e-34	3.27858e-29
NFYB	ENCFF836VRV	ENCFF772HOY	37104	ETS2	8952	401	22	1	0.985478	0.36784	1
NFYB	ENCFF836VRV	ENCFF404YMX	37104	ETV1	8952	401	948	104	42.4651	7.24802e-16	7.84533e-11
NFYB	ENCFF836VRV	ENCFF545VNY	37104	ETV6	8952	401	250	34	11.1986	2.17733e-08	0.00235677
NFYB	ENCFF836VRV	ENCFF820EVZ	37104	EWSR1	8952	401	10	1	0.447945	0.28621	1
NFYB	ENCFF836VRV	ENCFF883WYX	37104	FIP1L1	8952	401	674	184	30.1915	6.89787e-80	7.46632e-75
NFYB	ENCFF836VRV	ENCFF002CVW	37104	FOS	8952	401	3625	267	162.38	1.4357e-14	1.55402e-09
NFYB	ENCFF836VRV	ENCFF473GCH	37104	FOSL1	8952	401	202	9	9.04848	0.131738	1
NFYB	ENCFF836VRV	ENCFF809YFY	37104	FOXA1	8952	401	17	0	0.761506	0.466963	1
NFYB	ENCFF836VRV	ENCFF452SPE	37104	FOXJ2	8952	401	719	70	32.2072	3.09672e-09	0.000335192
NFYB	ENCFF836VRV	ENCFF699ZII	37104	FOXM1	8952	401	1366	76	61.1892	0.00866421	1
NFYB	ENCFF836VRV	ENCFF142CPK	37104	FUS	8952	401	197	63	8.82451	2.81081e-32	3.04244e-27
NFYB	ENCFF836VRV	ENCFF833FCO	37104	GABPA	8952	401	1778	206	79.6445	1.99883e-32	2.16355e-27
NFYB	ENCFF836VRV	ENCFF517KRT	37104	GABPB1	8952	401	2338	229	104.729	3.83956e-26	4.15598e-21
NFYB	ENCFF836VRV	ENCFF632NQI	37104	GATA1	8952	401	472	22	21.143	0.0832933	1
NFYB	ENCFF836VRV	ENCFF732HOE	37104	GATA2	8952	401	327	5	14.6478	0.0024447	1
NFYB	ENCFF836VRV	ENCFF253FZN	37104	GATAD2A	8952	401	324	39	14.5134	4.96966e-08	0.00537921
NFYB	ENCFF836VRV	ENCFF549KOD	37104	GATAD2B	8952	401	474	58	21.2326	2.36479e-11	2.55967e-06
NFYB	ENCFF836VRV	ENCFF126BCK	37104	GMEB1	8952	401	1653	207	74.0452	5.81189e-37	6.29085e-32
NFYB	ENCFF836VRV	ENCFF167HYX	37104	GTF2A2	8952	401	175	23	7.83903	5.63757e-06	0.610216
NFYB	ENCFF836VRV	ENCFF002CWR	37104	GTF2B	8952	401	606	52	27.1454	7.18581e-06	0.777799
NFYB	ENCFF836VRV	ENCFF778RMG	37104	GTF2E2	8952	401	780	91	34.9397	1.37067e-15	1.48363e-10
NFYB	ENCFF836VRV	ENCFF002CYL	37104	GTF3C2	8952	401	36	1	1.6126	0.321502	1
NFYB	ENCFF836VRV	ENCFF474NLG	37104	HCFC1	8952	401	1895	202	84.8855	1.7932e-27	1.94098e-22
NFYB	ENCFF836VRV	ENCFF580DYE	37104	HDAC3	8952	401	261	11	11.6914	0.116914	1
NFYB	ENCFF836VRV	ENCFF998HOR	37104	HDAC6	8952	401	85	17	3.80753	4.63743e-07	0.050196
NFYB	ENCFF836VRV	ENCFF939ZFS	37104	HDAC8	8952	401	232	30	10.3923	3.66761e-07	0.0396986
NFYB	ENCFF836VRV	ENCFF676NPW	37104	HES1	8952	401	504	49	22.5764	5.4976e-07	0.0595065
NFYB	ENCFF836VRV	ENCFF265LKN	37104	HINFP	8952	401	226	20	10.1235	0.00210828	1
NFYB	ENCFF836VRV	ENCFF396NSO	37104	HLTF	8952	401	195	24	8.73492	1.00921e-05	1
NFYB	ENCFF836VRV	ENCFF558DSF	37104	HMBOX1	8952	401	512	21	22.9348	0.079725	1
NFYB	ENCFF836VRV	ENCFF002CWT	37104	HMGN3	8952	401	1513	274	67.774	5.15679e-79	5.58176e-74
NFYB	ENCFF836VRV	ENCFF292JRY	37104	HNRNPH1	8952	401	15	10	0.671917	2.63987e-09	0.000285742
NFYB	ENCFF836VRV	ENCFF777CWV	37104	HNRNPK	8952	401	381	83	17.0667	1.82103e-30	1.9711e-25
NFYB	ENCFF836VRV	ENCFF010STZ	37104	HNRNPL	8952	401	398	91	17.8282	9.48652e-35	1.02683e-29
NFYB	ENCFF836VRV	ENCFF122QSN	37104	HNRNPLL	8952	401	1631	210	73.0598	4.15336e-39	4.49564e-34
NFYB	ENCFF836VRV	ENCFF768TJI	37104	HNRNPUL1	8952	401	26	2	1.16466	0.211622	1
NFYB	ENCFF836VRV	ENCFF835YLR	37104	ID3	8952	401	578	70	25.8912	3.96132e-13	4.28778e-08
NFYB	ENCFF836VRV	ENCFF415YPX	37104	ILF3	8952	401	112	20	5.01698	2.77892e-07	0.0300793
NFYB	ENCFF836VRV	ENCFF176NOI	37104	ILK	8952	401	11	0	0.492739	0.610951	1
NFYB	ENCFF836VRV	ENCFF388AJH	37104	IRF1	8952	401	182	8	8.15259	0.139386	1
NFYB	ENCFF836VRV	ENCFF284VUQ	37104	IRF1_0	8952	401	3230	333	144.686	3.72792e-41	4.03514e-36
NFYB	ENCFF836VRV	ENCFF909LKK	37104	IRF1_1	8952	401	1104	121	49.4531	4.09277e-18	4.43006e-13
NFYB	ENCFF836VRV	ENCFF908UIY	37104	IRF1_2	8952	401	1228	122	55.0076	2.8024e-15	3.03335e-10
NFYB	ENCFF836VRV	ENCFF730RUF	37104	IRF1_3	8952	401	70	1	3.13561	0.136315	1
NFYB	ENCFF836VRV	ENCFF384YDT	37104	IRF2	8952	401	787	73	35.2532	9.6588e-09	0.00104548
NFYB	ENCFF836VRV	ENCFF196DHR	37104	IRF9	8952	401	162	10	7.2567	0.0787199	1
NFYB	ENCFF836VRV	ENCFF629BFI	37104	JUN	8952	401	1372	156	61.458	2.84433e-24	3.07873e-19
NFYB	ENCFF836VRV	ENCFF417QAJ	37104	JUN_0	8952	401	290	12	12.9904	0.110021	1
NFYB	ENCFF836VRV	ENCFF573GQX	37104	JUN_1	8952	401	193	5	8.64533	0.0708121	1
NFYB	ENCFF836VRV	ENCFF192BTP	37104	JUN_2	8952	401	185	4	8.28697	0.0494749	1
NFYB	ENCFF836VRV	ENCFF077UYM	37104	JUN_3	8952	401	495	49	22.1733	3.40265e-07	0.0368306
NFYB	ENCFF836VRV	ENCFF426DUB	37104	JUNB	8952	401	204	22	9.13807	0.000131649	1
NFYB	ENCFF836VRV	ENCFF337DKJ	37104	JUND	8952	401	2322	212	104.013	5.95639e-21	6.44726e-16
NFYB	ENCFF836VRV	ENCFF772QPO	37104	KAT8	8952	401	66	4	2.95643	0.165538	1
NFYB	ENCFF836VRV	ENCFF838COI_ENCFF738WCE	37104	KDM1A	8952	401	357	8	15.9916	0.0120378	1
NFYB	ENCFF836VRV	ENCFF042RAK	37104	KDM4B	8952	401	695	104	31.1321	5.7601e-25	6.2348e-20
NFYB	ENCFF836VRV	ENCFF368TYM	37104	KDM5B	8952	401	1661	199	74.4036	3.45352e-33	3.73813e-28
NFYB	ENCFF836VRV	ENCFF962VSZ	37104	KHSRP	8952	401	308	27	13.7967	0.000556051	1
NFYB	ENCFF836VRV	ENCFF717TWA	37104	KLF1	8952	401	712	101	31.8937	1.11833e-22	1.21049e-17
NFYB	ENCFF836VRV	ENCFF802XZN	37104	KLF13	8952	401	655	102	29.3404	9.04076e-26	9.7858e-21
NFYB	ENCFF836VRV	ENCFF844HBQ	37104	KLF16	8952	401	524	45	23.4723	2.53105e-05	1
NFYB	ENCFF836VRV	ENCFF314ULQ	37104	L3MBTL2	8952	401	2628	232	117.72	4.93358e-21	5.34015e-16
NFYB	ENCFF836VRV	ENCFF511OXK	37104	LARP7	8952	401	85	9	3.80753	0.0102905	1
NFYB	ENCFF836VRV	ENCFF659WAF	37104	LEF1	8952	401	684	54	30.6394	3.88416e-05	1
NFYB	ENCFF836VRV	ENCFF308IXJ	37104	MAFF	8952	401	384	13	17.2011	0.0627496	1
NFYB	ENCFF836VRV	ENCFF927JBT	37104	MAFG	8952	401	569	10	25.488	0.000271822	1
NFYB	ENCFF836VRV	ENCFF812QPN	37104	MAFK	8952	401	603	45	27.0111	0.000408138	1
NFYB	ENCFF836VRV	ENCFF799HIG_ENCFF422NGZ	37104	MAX	8952	401	2485	254	111.314	2.302e-31	2.4917e-26
NFYB	ENCFF836VRV	ENCFF470MLY	37104	MBD2	8952	401	2937	291	131.561	1.93034e-33	2.08942e-28
NFYB	ENCFF836VRV	ENCFF226CZE	37104	MCM2	8952	401	10	0	0.447945	0.63894	1
NFYB	ENCFF836VRV	ENCFF679ITJ	37104	MCM3	8952	401	7	1	0.313561	0.229163	1
NFYB	ENCFF836VRV	ENCFF920RYJ	37104	MCM5	8952	401	1	0	0.0447945	0.956194	1
NFYB	ENCFF836VRV	ENCFF577UJR	37104	MEF2A	8952	401	40	3	1.79178	0.159787	1
NFYB	ENCFF836VRV	ENCFF257RYT	37104	MEF2D	8952	401	295	12	13.2144	0.107967	1
NFYB	ENCFF836VRV	ENCFF613RNG	37104	MEIS2	8952	401	2014	179	90.216	5.85823e-17	6.341e-12
NFYB	ENCFF836VRV	ENCFF670ZCR	37104	MGA	8952	401	1391	120	62.3091	2.88591e-11	3.12374e-06
NFYB	ENCFF836VRV	ENCFF365NKO	37104	MIER1	8952	401	112	10	5.01698	0.0184422	1
NFYB	ENCFF836VRV	ENCFF497XOD	37104	MITF	8952	401	1452	76	65.0416	0.01905	1
NFYB	ENCFF836VRV	ENCFF973OME_ENCFF059ONJ	37104	MNT	8952	401	1653	205	74.0452	4.52023e-36	4.89274e-31
NFYB	ENCFF836VRV	ENCFF769GYG	37104	MTA1	8952	401	635	57	28.4445	8.25776e-07	0.0893828
NFYB	ENCFF836VRV	ENCFF350YXB	37104	MTA3	8952	401	2033	223	91.0671	9.77192e-32	1.05772e-26
NFYB	ENCFF836VRV	ENCFF970LCB	37104	MXI1	8952	401	1084	142	48.5572	8.49708e-28	9.19732e-23
NFYB	ENCFF836VRV	ENCFF877ANE	37104	MYBL2	8952	401	512	25	22.9348	0.0726557	1
NFYB	ENCFF836VRV	ENCFF465JKF	37104	MYC	8952	401	2224	243	99.6229	3.7565e-34	4.06607e-29
NFYB	ENCFF836VRV	ENCFF099SDW	37104	MYC_0	8952	401	1616	183	72.3878	6.28059e-28	6.79817e-23
NFYB	ENCFF836VRV	ENCFF634AYU	37104	MYC_1	8952	401	778	90	34.8501	3.09894e-15	3.35433e-10
NFYB	ENCFF836VRV	ENCFF676YJE	37104	MYC_2	8952	401	2518	270	112.792	2.02701e-36	2.19406e-31
NFYB	ENCFF836VRV	ENCFF387LTN	37104	MYC_3	8952	401	1137	140	50.9313	5.36506e-25	5.80719e-20
NFYB	ENCFF836VRV	ENCFF583DZD	37104	MYNN	8952	401	659	105	29.5195	3.21631e-27	3.48136e-22
NFYB	ENCFF836VRV	ENCFF074EZL	37104	NBN	8952	401	791	76	35.4324	1.23291e-09	0.000133451
NFYB	ENCFF836VRV	ENCFF495CSO	37104	NCOA4	8952	401	30	4	1.34383	0.0354447	1
NFYB	ENCFF836VRV	ENCFF322DSX	37104	NCOA6	8952	401	148	21	6.62958	4.6097e-06	0.498958
NFYB	ENCFF836VRV	ENCFF165BCW_ENCFF366UBB	37104	NCOR1	8952	401	450	34	20.1575	0.00133781	1
NFYB	ENCFF836VRV	ENCFF002CXG	37104	NELFE	8952	401	74	18	3.31479	1.32517e-08	0.00143438
NFYB	ENCFF836VRV	ENCFF581YKY	37104	NEUROD1	8952	401	2218	235	99.3541	2.90542e-31	3.14485e-26
NFYB	ENCFF836VRV	ENCFF495MHZ	37104	NFE2	8952	401	669	49	29.9675	0.000360619	1
NFYB	ENCFF836VRV	ENCFF175IUO	37104	NFE2L1	8952	401	58	1	2.59808	0.19334	1
NFYB	ENCFF836VRV	ENCFF370ENX	37104	NFIC	8952	401	926	98	41.4797	3.62325e-14	3.92184e-09
NFYB	ENCFF836VRV	ENCFF157UUF	37104	NFRKB	8952	401	698	63	31.2665	2.06017e-07	0.0222995
NFYB	ENCFF836VRV	ENCFF986MHU	37104	NFXL1	8952	401	52	1	2.32931	0.226788	1
NFYB	ENCFF836VRV	ENCFF012VES	37104	NFYA	8952	401	3615	282	161.932	3.82019e-18	4.13501e-13
NFYB	ENCFF836VRV	ENCFF113PMT	37104	NFYB	8952	401	8952	401	401	0.0199181	1
NFYB	ENCFF836VRV	ENCFF906PGD	37104	NKRF	8952	401	538	71	24.0994	5.32793e-15	5.76701e-10
NFYB	ENCFF836VRV	ENCFF776YPS	37104	NONO	8952	401	511	76	22.89	1.30805e-18	1.41584e-13
NFYB	ENCFF836VRV	ENCFF954NAJ	37104	NR0B1	8952	401	0	0	0	1	1
NFYB	ENCFF836VRV	ENCFF664ZGR	37104	NR2C1	8952	401	907	91	40.6286	4.24552e-12	4.5954e-07
NFYB	ENCFF836VRV	ENCFF594LCH	37104	NR2C2	8952	401	79	11	3.53876	0.00079313	1
NFYB	ENCFF836VRV	ENCFF175IIE	37104	NR2F1	8952	401	868	83	38.8816	2.92812e-10	3.16943e-05
NFYB	ENCFF836VRV	ENCFF255EOB	37104	NR2F2	8952	401	769	73	34.4469	3.99542e-09	0.000432468
NFYB	ENCFF836VRV	ENCFF712AXK	37104	NR2F6	8952	401	484	33	21.6805	0.00544357	1
NFYB	ENCFF836VRV	ENCFF859NPS	37104	NR4A1	8952	401	419	38	18.7689	3.3183e-05	1
NFYB	ENCFF836VRV	ENCFF144PPR_ENCFF493ABN	37104	NRF1	8952	401	1920	229	86.0054	1.33856e-37	1.44887e-32
NFYB	ENCFF836VRV	ENCFF289BUU	37104	NUFIP1	8952	401	102	9	4.56903	0.0247942	1
NFYB	ENCFF836VRV	ENCFF168HAG	37104	PBX2	8952	401	1779	118	79.6893	1.21877e-05	1
NFYB	ENCFF836VRV	ENCFF941RVL	37104	PCBP1	8952	401	622	138	27.8622	2.96264e-50	3.2068e-45
NFYB	ENCFF836VRV	ENCFF881XQF	37104	PCBP2	8952	401	37	10	1.65739	8.21674e-06	0.889388
NFYB	ENCFF836VRV	ENCFF462FRU	37104	PHB2	8952	401	94	0	4.21068	0.0148363	1
NFYB	ENCFF836VRV	ENCFF948YVM	37104	PHF20	8952	401	727	106	32.5656	1.41281e-24	1.52924e-19
NFYB	ENCFF836VRV	ENCFF134CUM	37104	PHF21A	8952	401	549	69	24.5922	1.1257e-13	1.21847e-08
NFYB	ENCFF836VRV	ENCFF626KTJ	37104	PHF8	8952	401	1055	126	47.2582	1.2161e-21	1.31632e-16
NFYB	ENCFF836VRV	ENCFF544XKC	37104	PKNOX1	8952	401	3439	259	154.048	3.40816e-15	3.68902e-10
NFYB	ENCFF836VRV	ENCFF881QBT	37104	PML	8952	401	1497	168	67.0573	2.07912e-25	2.25047e-20
NFYB	ENCFF836VRV	ENCFF662YQK	37104	POLR2A_0	8952	401	2114	232	94.6955	5.80475e-33	6.28312e-28
NFYB	ENCFF836VRV	ENCFF853ZMA	37104	POLR2A_1	8952	401	2334	264	104.55	2.7322e-39	2.95736e-34
NFYB	ENCFF836VRV	ENCFF206YXX	37104	POLR2A_2	8952	401	2119	233	94.9195	3.26993e-33	3.53941e-28
NFYB	ENCFF836VRV	ENCFF270QAB	37104	POLR2A_3	8952	401	2363	249	105.849	1.16386e-32	1.25977e-27
NFYB	ENCFF836VRV	ENCFF296CNQ	37104	POLR2AphosphoS2	8952	401	671	128	30.0571	3.44673e-40	3.73078e-35
NFYB	ENCFF836VRV	ENCFF542DOG	37104	POLR2AphosphoS5	8952	401	2039	214	91.3359	3.77236e-28	4.08324e-23
NFYB	ENCFF836VRV	ENCFF872JJJ	37104	POLR2B	8952	401	1396	160	62.5331	3.5183e-25	3.80825e-20
NFYB	ENCFF836VRV	ENCFF273EYJ	37104	POLR2G	8952	401	2355	319	105.491	5.90374e-63	6.39026e-58
NFYB	ENCFF836VRV	ENCFF801YZV	37104	POLR2H	8952	401	1563	176	70.0137	1.12001e-26	1.21231e-21
NFYB	ENCFF836VRV	ENCFF002CXW	37104	POLR3A	8952	401	16	1	0.716711	0.35001	1
NFYB	ENCFF836VRV	ENCFF002CXT	37104	POLR3G	8952	401	5	0	0.223972	0.799337	1
NFYB	ENCFF836VRV	ENCFF990CFV	37104	POU5F1	8952	401	302	52	13.5279	1.10223e-15	1.19306e-10
NFYB	ENCFF836VRV	ENCFF294HEI	37104	PRDM10	8952	401	1321	131	59.1735	3.32638e-16	3.60051e-11
NFYB	ENCFF836VRV	ENCFF785ACI	37104	PRPF4	8952	401	469	107	21.0086	1.92265e-40	2.08109e-35
NFYB	ENCFF836VRV	ENCFF694BIA	37104	PTBP1	8952	401	157	29	7.03273	3.67942e-10	3.98265e-05
NFYB	ENCFF836VRV	ENCFF007DKB	37104	PTRF	8952	401	51	0	2.28452	0.101823	1
NFYB	ENCFF836VRV	ENCFF332DRG	37104	PTTG1	8952	401	42	0	1.88137	0.152382	1
NFYB	ENCFF836VRV	ENCFF421KIV	37104	PYGO2	8952	401	78	5	3.49397	0.131826	1
NFYB	ENCFF836VRV	ENCFF002CXU	37104	RAD21	8952	401	149	8	6.67437	0.123345	1
NFYB	ENCFF836VRV	ENCFF096XMD	37104	RAD51	8952	401	2127	96	95.2778	0.0405706	1
NFYB	ENCFF836VRV	ENCFF975IRM	37104	RB1	8952	401	1520	205	68.0876	5.95033e-41	6.4407e-36
NFYB	ENCFF836VRV	ENCFF379MPS	37104	RBBP5	8952	401	894	143	40.0462	1.54356e-36	1.67076e-31
NFYB	ENCFF836VRV	ENCFF120IDE	37104	RBFOX2	8952	401	2507	320	112.3	1.05799e-57	1.14518e-52
NFYB	ENCFF836VRV	ENCFF682SIY	37104	RBM14	8952	401	97	25	4.34506	7.45107e-12	8.06511e-07
NFYB	ENCFF836VRV	ENCFF971VJZ	37104	RBM15	8952	401	15	5	0.671917	0.00058289	1
NFYB	ENCFF836VRV	ENCFF861YKK	37104	RBM17	8952	401	0	0	0	1	1
NFYB	ENCFF836VRV	ENCFF522JUV	37104	RBM22	8952	401	421	124	18.8585	6.23446e-58	6.74824e-53
NFYB	ENCFF836VRV	ENCFF680WBN	37104	RBM25	8952	401	3467	270	155.302	2.22595e-17	2.40939e-12
NFYB	ENCFF836VRV	ENCFF782GWS	37104	RBM34	8952	401	121	36	5.42013	3.16141e-18	3.42194e-13
NFYB	ENCFF836VRV	ENCFF209JJD	37104	RBM39	8952	401	81	4	3.62835	0.191802	1
NFYB	ENCFF836VRV	ENCFF484CKD	37104	RCOR1	8952	401	331	22	14.827	0.0187549	1
NFYB	ENCFF836VRV	ENCFF580QGA	37104	RELA	8952	401	141	7	6.31602	0.143768	1
NFYB	ENCFF836VRV	ENCFF237UAN_ENCFF010UHD	37104	RFX1	8952	401	750	56	33.5958	0.000107061	1
NFYB	ENCFF836VRV	ENCFF716LRI	37104	RFX5	8952	401	575	62	25.7568	6.18549e-10	6.69524e-05
NFYB	ENCFF836VRV	ENCFF209HKW	37104	RLF	8952	401	270	33	12.0945	3.42093e-07	0.0370285
NFYB	ENCFF836VRV	ENCFF478MPX	37104	SAFB	8952	401	329	75	14.7374	6.86343e-29	7.42905e-24
NFYB	ENCFF836VRV	ENCFF624NUZ	37104	SAFB2	8952	401	2	0	0.0895889	0.914307	1
NFYB	ENCFF836VRV	ENCFF718NUA	37104	SAP30	8952	401	676	96	30.2811	1.10956e-21	1.201e-16
NFYB	ENCFF836VRV	ENCFF294EHN	37104	SETDB1	8952	401	286	33	12.8112	1.11675e-06	0.120878
NFYB	ENCFF836VRV	ENCFF757ODD	37104	SFPQ	8952	401	10	5	0.447945	9.60286e-05	1
NFYB	ENCFF836VRV	ENCFF191MPD	37104	SIN3A	8952	401	1094	143	49.0051	6.85389e-28	7.41872e-23
NFYB	ENCFF836VRV	ENCFF280GTU	37104	SIN3B	8952	401	744	120	33.3271	2.73217e-31	2.95733e-26
NFYB	ENCFF836VRV	ENCFF002CXZ	37104	SIRT6	8952	401	107	4	4.79301	0.18224	1
NFYB	ENCFF836VRV	ENCFF033EBX_ENCFF002CMM	37104	SIX5	8952	401	637	42	28.5341	0.00384954	1
NFYB	ENCFF836VRV	ENCFF481WGW	37104	SKIL	8952	401	1358	172	60.8309	1.32288e-31	1.4319e-26
NFYB	ENCFF836VRV	ENCFF315YAF	37104	SMAD1	8952	401	815	96	36.5075	1.37181e-16	1.48486e-11
NFYB	ENCFF836VRV	ENCFF011KRN	37104	SMAD2	8952	401	14	1	0.627122	0.334963	1
NFYB	ENCFF836VRV	ENCFF178MOP	37104	SMAD5	8952	401	2109	237	94.4715	4.40218e-35	4.76497e-30
NFYB	ENCFF836VRV	ENCFF995NIE	37104	SMARCA5	8952	401	88	4	3.94191	0.195284	1
NFYB	ENCFF836VRV	ENCFF944GJH	37104	SMARCB1	8952	401	77	0	3.44917	0.0317719	1
NFYB	ENCFF836VRV	ENCFF114PTZ	37104	SMARCC2	8952	401	259	5	11.6018	0.0160272	1
NFYB	ENCFF836VRV	ENCFF622RBW	37104	SMARCE1	8952	401	489	15	21.9045	0.0300953	1
NFYB	ENCFF836VRV	ENCFF041YQC	37104	SMC3	8952	401	438	48	19.62	2.72125e-08	0.00294551
NFYB	ENCFF836VRV	ENCFF494ZUY	37104	SNIP1	8952	401	103	15	4.61383	6.92887e-05	1
NFYB	ENCFF836VRV	ENCFF033KXY	37104	SNRNP70	8952	401	3	1	0.134383	0.117485	1
NFYB	ENCFF836VRV	ENCFF241TBP	37104	SOX6	8952	401	1337	146	59.8902	2.59368e-21	2.80742e-16
NFYB	ENCFF836VRV	ENCFF300XUA	37104	SP1	8952	401	2565	293	114.898	3.93792e-44	4.26244e-39
NFYB	ENCFF836VRV	ENCFF002CMJ	37104	SPI1	8952	401	872	75	39.0608	1.05213e-07	0.0113884
NFYB	ENCFF836VRV	ENCFF985TSH	37104	SREBF1	8952	401	462	64	20.695	1.33132e-14	1.44104e-09
NFYB	ENCFF836VRV	ENCFF798URE	37104	SRSF1	8952	401	94	33	4.21068	6.859e-19	7.42425e-14
NFYB	ENCFF836VRV	ENCFF722XRW	37104	SRSF3	8952	401	23	7	1.03027	8.72555e-05	1
NFYB	ENCFF836VRV	ENCFF059WVE	37104	SRSF7	8952	401	3	1	0.134383	0.117485	1
NFYB	ENCFF836VRV	ENCFF137IBM	37104	SRSF9	8952	401	0	0	0	1	1
NFYB	ENCFF836VRV	ENCFF290HTJ	37104	STAT1_0	8952	401	77	4	3.44917	0.187366	1
NFYB	ENCFF836VRV	ENCFF254MPF	37104	STAT1_1	8952	401	79	4	3.53876	0.189815	1
NFYB	ENCFF836VRV	ENCFF498DOQ	37104	STAT1_2	8952	401	44	3	1.97096	0.177789	1
NFYB	ENCFF836VRV	ENCFF648NYF	37104	STAT1_3	8952	401	195	17	8.73492	0.00453738	1
NFYB	ENCFF836VRV	ENCFF841YFF	37104	STAT2_0	8952	401	112	4	5.01698	0.174868	1
NFYB	ENCFF836VRV	ENCFF714VIT	37104	STAT2_1	8952	401	248	19	11.109	0.00908156	1
NFYB	ENCFF836VRV	ENCFF696KPD	37104	STAT5A	8952	401	409	18	18.3209	0.093333	1
NFYB	ENCFF836VRV	ENCFF484HCG	37104	SUPT5H	8952	401	1504	183	67.3709	1.85538e-31	2.00828e-26
NFYB	ENCFF836VRV	ENCFF822FWM	37104	TAF1	8952	401	2161	237	96.8008	1.3775e-33	1.49102e-28
NFYB	ENCFF836VRV	ENCFF617CAZ	37104	TAF15	8952	401	30	8	1.34383	6.88057e-05	1
NFYB	ENCFF836VRV	ENCFF034CQR	37104	TAF7	8952	401	37	7	1.65739	0.00129943	1
NFYB	ENCFF836VRV	ENCFF785HXY	37104	TAF9B	8952	401	1088	112	48.7364	3.78584e-15	4.09783e-10
NFYB	ENCFF836VRV	ENCFF284LRP_ENCFF482CEV	37104	TAL1	8952	401	296	3	13.2592	0.000677668	1
NFYB	ENCFF836VRV	ENCFF626MVT	37104	TBL1XR1	8952	401	1010	109	45.2424	4.43024e-16	4.79533e-11
NFYB	ENCFF836VRV	ENCFF380FJL	37104	TBP	8952	401	2571	246	115.167	1.38609e-26	1.50032e-21
NFYB	ENCFF836VRV	ENCFF249EZR	37104	TCF7	8952	401	387	60	17.3355	7.71344e-16	8.34911e-11
NFYB	ENCFF836VRV	ENCFF312RFN	37104	TCF7L2	8952	401	222	26	9.94437	1.02945e-05	1
NFYB	ENCFF836VRV	ENCFF619BDC	37104	TEAD2	8952	401	142	8	6.36081	0.114846	1
NFYB	ENCFF836VRV	ENCFF209MQX	37104	TEAD4	8952	401	1125	92	50.3938	4.34678e-08	0.004705
NFYB	ENCFF836VRV	ENCFF701MXF	37104	TFDP1	8952	401	1406	155	62.981	6.99726e-23	7.57391e-18
NFYB	ENCFF836VRV	ENCFF641LJY	37104	THAP1	8952	401	728	117	32.6104	2.00138e-30	2.16631e-25
NFYB	ENCFF836VRV	ENCFF671BFH	37104	THRA	8952	401	30	3	1.34383	0.105503	1
NFYB	ENCFF836VRV	ENCFF294VWT	37104	THRAP3	8952	401	24	4	1.07507	0.0189948	1
NFYB	ENCFF836VRV	ENCFF262BVP	37104	TOE1	8952	401	1364	121	61.0996	4.64796e-12	5.031e-07
NFYB	ENCFF836VRV	ENCFF049CRW_ENCFF646VQW	37104	TRIM24	8952	401	277	9	12.4081	0.0784909	1
NFYB	ENCFF836VRV	ENCFF561IZB	37104	TRIP13	8952	401	251	4	11.2434	0.00871827	1
NFYB	ENCFF836VRV	ENCFF036YVI	37104	TSC22D4	8952	401	8	0	0.358356	0.698824	1
NFYB	ENCFF836VRV	ENCFF730URE	37104	U2AF1	8952	401	234	61	10.4819	9.75241e-27	1.05561e-21
NFYB	ENCFF836VRV	ENCFF398EQF	37104	U2AF2	8952	401	0	0	0	1	1
NFYB	ENCFF836VRV	ENCFF671DOL	37104	UBTF	8952	401	903	100	40.4494	1.42643e-15	1.54399e-10
NFYB	ENCFF836VRV	ENCFF334FMW	37104	USF1	8952	401	2749	144	123.14	0.00622496	1
NFYB	ENCFF836VRV	ENCFF150VTD	37104	USF2	8952	401	1020	54	45.6903	0.0265544	1
NFYB	ENCFF836VRV	ENCFF186QUP	37104	VEZF1	8952	401	2580	277	115.57	2.13167e-37	2.30734e-32
NFYB	ENCFF836VRV	ENCFF803LEC	37104	XRCC3	8952	401	7	0	0.313561	0.73084	1
NFYB	ENCFF836VRV	ENCFF998KKJ	37104	XRCC5	8952	401	805	106	36.0595	2.11052e-21	2.28445e-16
NFYB	ENCFF836VRV	ENCFF706LIT	37104	YBX1	8952	401	3	0	0.134383	0.874255	1
NFYB	ENCFF836VRV	ENCFF246HIU	37104	YBX3	8952	401	165	13	7.39109	0.0194545	1
NFYB	ENCFF836VRV	ENCFF926FUM_ENCFF328XKC	37104	YY1	8952	401	1295	142	58.0088	6.20337e-21	6.71459e-16
NFYB	ENCFF836VRV	ENCFF253FON	37104	ZBED1	8952	401	411	61	18.4105	2.93725e-15	3.1793e-10
NFYB	ENCFF836VRV	ENCFF434QZL	37104	ZBTB11	8952	401	532	80	23.8307	9.26032e-20	1.00235e-14
NFYB	ENCFF836VRV	ENCFF561USY	37104	ZBTB2	8952	401	733	94	32.8343	1.73265e-18	1.87543e-13
NFYB	ENCFF836VRV	ENCFF408FQC	37104	ZBTB33	8952	401	476	10	21.3222	0.00294071	1
NFYB	ENCFF836VRV	ENCFF417LEJ	37104	ZBTB40	8952	401	1286	137	57.6057	2.92299e-19	3.16387e-14
NFYB	ENCFF836VRV	ENCFF706ISJ	37104	ZBTB7A	8952	401	1354	176	60.6517	1.39063e-33	1.50523e-28
NFYB	ENCFF836VRV	ENCFF589EVD	37104	ZBTB8A	8952	401	14	0	0.627122	0.534127	1
NFYB	ENCFF836VRV	ENCFF522JRK	37104	ZC3H11A	8952	401	160	27	7.16711	8.8039e-09	0.000952943
NFYB	ENCFF836VRV	ENCFF809OEX	37104	ZC3H8	8952	401	273	31	12.2289	3.04113e-06	0.329175
NFYB	ENCFF836VRV	ENCFF521CRG	37104	ZFP36	8952	401	420	42	18.8137	1.62009e-06	0.17536
NFYB	ENCFF836VRV	ENCFF396DNK	37104	ZFP91	8952	401	377	40	16.8875	7.19164e-07	0.077843
NFYB	ENCFF836VRV	ENCFF433RKB	37104	ZFX	8952	401	920	112	41.2109	4.87789e-20	5.27988e-15
NFYB	ENCFF836VRV	ENCFF195ODE	37104	ZHX1	8952	401	290	33	12.9904	1.47637e-06	0.159803
NFYB	ENCFF836VRV	ENCFF163VUK	37104	ZKSCAN1	8952	401	665	90	29.7883	3.59168e-19	3.88768e-14
NFYB	ENCFF836VRV	ENCFF529FWJ	37104	ZKSCAN8	8952	401	176	10	7.88382	0.0963175	1
NFYB	ENCFF836VRV	ENCFF597DIY	37104	ZMIZ1	8952	401	73	7	3.27	0.030148	1
NFYB	ENCFF836VRV	ENCFF511QHY	37104	ZMYM3	8952	401	80	2	3.58356	0.178353	1
NFYB	ENCFF836VRV	ENCFF114IWY	37104	ZNF143	8952	401	1419	118	63.5633	3.18066e-10	3.44278e-05
NFYB	ENCFF836VRV	ENCFF116DIO	37104	ZNF148	8952	401	844	83	37.8065	8.37087e-11	9.06071e-06
NFYB	ENCFF836VRV	ENCFF721LDD	37104	ZNF175	8952	401	526	38	23.5619	0.00155835	1
NFYB	ENCFF836VRV	ENCFF853TZC	37104	ZNF197	8952	401	375	37	16.7979	7.95196e-06	0.860728
NFYB	ENCFF836VRV	ENCFF891MVM	37104	ZNF263	8952	401	94	14	4.21068	9.37232e-05	1
NFYB	ENCFF836VRV	ENCFF344QKL	37104	ZNF274	8952	401	56	8	2.50849	0.00316486	1
NFYB	ENCFF836VRV	ENCFF386WKY	37104	ZNF280A	8952	401	31	0	1.38863	0.249417	1
NFYB	ENCFF836VRV	ENCFF581ZZT	37104	ZNF282	8952	401	554	90	24.8161	3.77243e-24	4.08332e-19
NFYB	ENCFF836VRV	ENCFF921WMN	37104	ZNF318	8952	401	328	19	14.6926	0.051152	1
NFYB	ENCFF836VRV	ENCFF744SVC	37104	ZNF354B	8952	401	134	5	6.00246	0.160557	1
NFYB	ENCFF836VRV	ENCFF706SJZ	37104	ZNF384	8952	401	618	67	27.683	1.10597e-10	1.19711e-05
NFYB	ENCFF836VRV	ENCFF388YOB	37104	ZNF395	8952	401	1005	116	45.0184	5.1455e-19	5.56954e-14
NFYB	ENCFF836VRV	ENCFF834WGJ	37104	ZNF507	8952	401	2	0	0.0895889	0.914307	1
NFYB	ENCFF836VRV	ENCFF447QUG	37104	ZNF512	8952	401	27	0	1.20945	0.298361	1
NFYB	ENCFF836VRV	ENCFF815TTY	37104	ZNF584	8952	401	348	40	15.5885	1.07278e-07	0.0116118
NFYB	ENCFF836VRV	ENCFF602AXP	37104	ZNF589	8952	401	618	53	27.683	6.0784e-06	0.657932
NFYB	ENCFF836VRV	ENCFF273TYA	37104	ZNF592	8952	401	654	45	29.2956	0.00160462	1
NFYB	ENCFF836VRV	ENCFF173NRW	37104	ZNF644	8952	401	389	37	17.425	1.64853e-05	1
NFYB	ENCFF836VRV	ENCFF248AOD	37104	ZNF766	8952	401	817	70	36.5971	2.94397e-07	0.0318658
NFYB	ENCFF836VRV	ENCFF654BMD	37104	ZNF83	8952	401	418	31	18.7241	0.00249822	1
NFYB	ENCFF836VRV	ENCFF996IVU	37104	ZNF830	8952	401	80	9	3.58356	0.00746013	1
NFYB	ENCFF836VRV	ENCFF253NXR	37104	ZSCAN29	8952	401	356	22	15.9468	0.0303703	1
NFYB	ENCFF836VRV	ENCFF588OLK	37104	ZZZ3	8952	401	153	23	6.85355	6.87238e-07	0.0743874
NFYB	ENCFF396GUH	ENCFF836VRV	ADNP	37104	8952	127	401	1	5.6889	0.0192474	1
NFYB	ENCFF396GUH	ENCFF396GUH	ADNP	ADNP	8952	127	127	127	1.80172	1.62506e-182	1.75898e-177
NFYB	ENCFF396GUH	ENCFF360BTO	ADNP	AFF1	8952	127	543	36	7.70342	1.01046e-13	1.09373e-08
NFYB	ENCFF396GUH	ENCFF010MMQ	ADNP	ARHGAP35	8952	127	85	3	1.20588	0.0875087	1
NFYB	ENCFF396GUH	ENCFF225MPC	ADNP	ARID1B	8952	127	675	60	9.57607	6.19776e-28	6.70852e-23
NFYB	ENCFF396GUH	ENCFF332ICQ	ADNP	ARID2	8952	127	79	6	1.12076	0.000897417	1
NFYB	ENCFF396GUH	ENCFF835KAT	ADNP	ARID3A	8952	127	570	35	8.08646	1.75958e-12	1.90459e-07
NFYB	ENCFF396GUH	ENCFF235ZZP	ADNP	ASH1L	8952	127	2325	30	32.9842	0.0631918	1
NFYB	ENCFF396GUH	ENCFF002CVM	ADNP	ATF1	8952	127	1593	42	22.5995	8.12168e-05	1
NFYB	ENCFF396GUH	ENCFF968KBN	ADNP	ATF2	8952	127	826	25	11.7183	0.000276544	1
NFYB	ENCFF396GUH	ENCFF958KNK	ADNP	ATF3	8952	127	1033	48	14.6549	3.22673e-12	3.49265e-07
NFYB	ENCFF396GUH	ENCFF710IEF	ADNP	ATF4	8952	127	426	26	6.04357	1.21149e-09	0.000131132
NFYB	ENCFF396GUH	ENCFF868QLL	ADNP	ATF7	8952	127	2939	78	41.6949	1.60178e-07	0.0173379
NFYB	ENCFF396GUH	ENCFF423EMU	ADNP	BACH1	8952	127	116	10	1.64567	7.74372e-06	0.838188
NFYB	ENCFF396GUH	ENCFF057ZUY	ADNP	BCOR	8952	127	382	48	5.41935	6.05278e-29	6.55159e-24
NFYB	ENCFF396GUH	ENCFF002CVP	ADNP	BDP1	8952	127	13	4	0.184428	4.00867e-05	1
NFYB	ENCFF396GUH	ENCFF179NDS	ADNP	BHLHE40	8952	127	1665	50	23.621	8.38221e-07	0.0907299
NFYB	ENCFF396GUH	ENCFF048OIZ	ADNP	BMI1	8952	127	278	5	3.94392	0.154041	1
NFYB	ENCFF396GUH	ENCFF549GMO	ADNP	BRCA1	8952	127	1	0	0.0141868	0.985913	1
NFYB	ENCFF396GUH	ENCFF714XHL	ADNP	BRD4	8952	127	160	11	2.26988	2.13347e-05	1
NFYB	ENCFF396GUH	ENCFF666LZV	ADNP	BRD9	8952	127	305	33	4.32697	1.50035e-18	1.62399e-13
NFYB	ENCFF396GUH	ENCFF002CVR	ADNP	BRF1	8952	127	10	3	0.141868	0.00041294	1
NFYB	ENCFF396GUH	ENCFF002CVS	ADNP	BRF2	8952	127	7	0	0.0993074	0.905464	1
NFYB	ENCFF396GUH	ENCFF996ZGL	ADNP	C11orf30	8952	127	1723	36	24.4438	0.00613386	1
NFYB	ENCFF396GUH	ENCFF642BNC	ADNP	CBFA2T2	8952	127	1271	51	18.0314	1.0862e-10	1.17572e-05
NFYB	ENCFF396GUH	ENCFF993GXU	ADNP	CBFA2T3	8952	127	635	48	9.0086	6.56537e-20	7.10642e-15
NFYB	ENCFF396GUH	ENCFF484DKT	ADNP	CBX1	8952	127	963	45	13.6619	1.22142e-11	1.32207e-06
NFYB	ENCFF396GUH	ENCFF455TDM	ADNP	CBX3	8952	127	1458	67	20.6843	4.00798e-16	4.33827e-11
NFYB	ENCFF396GUH	ENCFF062ARS	ADNP	CBX5	8952	127	211	13	2.99341	1.24698e-05	1
NFYB	ENCFF396GUH	ENCFF456PQY	ADNP	CBX8	8952	127	3	0	0.0425603	0.958333	1
NFYB	ENCFF396GUH	ENCFF874QUM	ADNP	CC2D1A	8952	127	1405	51	19.9324	2.69386e-09	0.000291586
NFYB	ENCFF396GUH	ENCFF583GKE	ADNP	CCAR2	8952	127	26	3	0.368856	0.00578399	1
NFYB	ENCFF396GUH	ENCFF002CVU	ADNP	CCNT2	8952	127	1787	58	25.3518	1.12505e-08	0.00121777
NFYB	ENCFF396GUH	ENCFF643TEZ	ADNP	CDC5L	8952	127	74	4	1.04982	0.0177141	1
NFYB	ENCFF396GUH	ENCFF813LOW_ENCFF429XKT	ADNP	CEBPB	8952	127	594	20	8.42694	0.000293428	1
NFYB	ENCFF396GUH	ENCFF925MHB	ADNP	CEBPZ	8952	127	593	1	8.41276	0.00186777	1
NFYB	ENCFF396GUH	ENCFF859FVX	ADNP	CHAMP1	8952	127	684	44	9.70375	6.11594e-16	6.61995e-11
NFYB	ENCFF396GUH	ENCFF684MLP	ADNP	COPS2	8952	127	11	0	0.156055	0.855513	1
NFYB	ENCFF396GUH	ENCFF665FHC	ADNP	CREB3	8952	127	330	16	4.68164	2.35794e-05	1
NFYB	ENCFF396GUH	ENCFF582YPB	ADNP	CREB3L1	8952	127	1553	49	22.0321	2.86545e-07	0.0310159
NFYB	ENCFF396GUH	ENCFF948TXN	ADNP	CREM	8952	127	3223	77	45.724	6.47887e-06	0.70128
NFYB	ENCFF396GUH	ENCFF117EWO	ADNP	CSDE1	8952	127	467	8	6.62522	0.12212	1
NFYB	ENCFF396GUH	ENCFF152VMJ	ADNP	CTBP1	8952	127	2152	67	30.5299	4.52589e-09	0.000489887
NFYB	ENCFF396GUH	ENCFF002DDJ_ENCFF002DBD	ADNP	CTCF	8952	127	445	18	6.31311	7.18281e-05	1
NFYB	ENCFF396GUH	ENCFF962FQM	ADNP	CTCFL	8952	127	434	12	6.15706	0.013127	1
NFYB	ENCFF396GUH	ENCFF517YCC	ADNP	CUX1	8952	127	205	13	2.90829	9.33155e-06	1
NFYB	ENCFF396GUH	ENCFF526HLP	ADNP	DACH1	8952	127	492	35	6.97989	3.08422e-14	3.33839e-09
NFYB	ENCFF396GUH	ENCFF338HQY	ADNP	DDX20	8952	127	2080	49	29.5085	0.000267869	1
NFYB	ENCFF396GUH	ENCFF786WZD	ADNP	DEAF1	8952	127	775	11	10.9947	0.119378	1
NFYB	ENCFF396GUH	ENCFF408SNO	ADNP	DIDO1	8952	127	566	16	8.02971	0.00464859	1
NFYB	ENCFF396GUH	ENCFF034PQD	ADNP	DNMT1	8952	127	43	4	0.610031	0.00313519	1
NFYB	ENCFF396GUH	ENCFF774QKS_ENCFF823SYE	ADNP	DPF2	8952	127	347	43	4.92281	7.01565e-26	7.59381e-21
NFYB	ENCFF396GUH	ENCFF106DAY	ADNP	E2F1	8952	127	2426	63	34.4171	3.73586e-06	0.404373
NFYB	ENCFF396GUH	ENCFF225TLP	ADNP	E2F4	8952	127	1863	33	26.43	0.0325172	1
NFYB	ENCFF396GUH	ENCFF356ASJ	ADNP	E2F5	8952	127	1026	37	14.5556	3.73234e-07	0.0403992
NFYB	ENCFF396GUH	ENCFF417DTI_ENCFF917COW	ADNP	E2F6	8952	127	1561	29	22.1456	0.0281241	1
NFYB	ENCFF396GUH	ENCFF310AGG	ADNP	E2F7	8952	127	371	9	5.26329	0.0442319	1
NFYB	ENCFF396GUH	ENCFF925DJG	ADNP	E2F8	8952	127	1153	33	16.3574	0.000102314	1
NFYB	ENCFF396GUH	ENCFF083YCQ	ADNP	E4F1	8952	127	2631	74	37.3254	3.96795e-08	0.00429495
NFYB	ENCFF396GUH	ENCFF806BDC	ADNP	EHMT2	8952	127	463	35	6.56848	5.55107e-15	6.00853e-10
NFYB	ENCFF396GUH	ENCFF502KHR	ADNP	ELF4	8952	127	1900	41	26.9549	0.00266285	1
NFYB	ENCFF396GUH	ENCFF019PEL	ADNP	ELK1	8952	127	476	7	6.7529	0.148339	1
NFYB	ENCFF396GUH	ENCFF549TYR	ADNP	EP300	8952	127	1149	61	16.3006	1.4443e-17	1.56333e-12
NFYB	ENCFF396GUH	ENCFF925ANU	ADNP	EP400	8952	127	1839	59	26.0895	1.25579e-08	0.00135928
NFYB	ENCFF396GUH	ENCFF213EPU	ADNP	ESRRA	8952	127	1586	54	22.5002	7.6392e-09	0.000826875
NFYB	ENCFF396GUH	ENCFF076YZO	ADNP	ETS1	8952	127	976	23	13.8463	0.00668048	1
NFYB	ENCFF396GUH	ENCFF772HOY	ADNP	ETS2	8952	127	22	1	0.312109	0.228433	1
NFYB	ENCFF396GUH	ENCFF404YMX	ADNP	ETV1	8952	127	948	29	13.4491	8.80391e-05	1
NFYB	ENCFF396GUH	ENCFF545VNY	ADNP	ETV6	8952	127	250	19	3.54669	6.62591e-09	0.000717195
NFYB	ENCFF396GUH	ENCFF820EVZ	ADNP	EWSR1	8952	127	10	0	0.141868	0.867736	1
NFYB	ENCFF396GUH	ENCFF883WYX	ADNP	FIP1L1	8952	127	674	10	9.56189	0.123879	1
NFYB	ENCFF396GUH	ENCFF002CVW	ADNP	FOS	8952	127	3625	53	51.4271	0.0534253	1
NFYB	ENCFF396GUH	ENCFF473GCH	ADNP	FOSL1	8952	127	202	14	2.86573	1.64555e-06	0.178116
NFYB	ENCFF396GUH	ENCFF809YFY	ADNP	FOXA1	8952	127	17	2	0.241175	0.0228504	1
NFYB	ENCFF396GUH	ENCFF452SPE	ADNP	FOXJ2	8952	127	719	29	10.2003	7.46956e-07	0.0808512
NFYB	ENCFF396GUH	ENCFF699ZII	ADNP	FOXM1	8952	127	1366	61	19.3791	2.54472e-14	2.75443e-09
NFYB	ENCFF396GUH	ENCFF142CPK	ADNP	FUS	8952	127	197	2	2.79479	0.238729	1
NFYB	ENCFF396GUH	ENCFF833FCO	ADNP	GABPA	8952	127	1778	41	25.2241	0.000989287	1
NFYB	ENCFF396GUH	ENCFF517KRT	ADNP	GABPB1	8952	127	2338	46	33.1687	0.00642616	1
NFYB	ENCFF396GUH	ENCFF632NQI	ADNP	GATA1	8952	127	472	34	6.69616	5.0096e-14	5.42244e-09
NFYB	ENCFF396GUH	ENCFF732HOE	ADNP	GATA2	8952	127	327	35	4.63908	1.97761e-19	2.14059e-14
NFYB	ENCFF396GUH	ENCFF253FZN	ADNP	GATAD2A	8952	127	324	24	4.59651	1.2863e-10	1.3923e-05
NFYB	ENCFF396GUH	ENCFF549KOD	ADNP	GATAD2B	8952	127	474	38	6.72453	6.48946e-17	7.02426e-12
NFYB	ENCFF396GUH	ENCFF126BCK	ADNP	GMEB1	8952	127	1653	60	23.4507	1.27259e-10	1.37747e-05
NFYB	ENCFF396GUH	ENCFF167HYX	ADNP	GTF2A2	8952	127	175	1	2.48269	0.207351	1
NFYB	ENCFF396GUH	ENCFF002CWR	ADNP	GTF2B	8952	127	606	9	8.59718	0.130537	1
NFYB	ENCFF396GUH	ENCFF778RMG	ADNP	GTF2E2	8952	127	780	23	11.0657	0.000621212	1
NFYB	ENCFF396GUH	ENCFF002CYL	ADNP	GTF3C2	8952	127	36	14	0.510724	5.65449e-16	6.12047e-11
NFYB	ENCFF396GUH	ENCFF474NLG	ADNP	HCFC1	8952	127	1895	31	26.8839	0.0529312	1
NFYB	ENCFF396GUH	ENCFF580DYE	ADNP	HDAC3	8952	127	261	29	3.70275	8.56207e-17	9.26767e-12
NFYB	ENCFF396GUH	ENCFF998HOR	ADNP	HDAC6	8952	127	85	1	1.20588	0.361075	1
NFYB	ENCFF396GUH	ENCFF939ZFS	ADNP	HDAC8	8952	127	232	12	3.29133	0.000125521	1
NFYB	ENCFF396GUH	ENCFF676NPW	ADNP	HES1	8952	127	504	41	7.15013	2.49568e-18	2.70135e-13
NFYB	ENCFF396GUH	ENCFF265LKN	ADNP	HINFP	8952	127	226	7	3.20621	0.0279946	1
NFYB	ENCFF396GUH	ENCFF396NSO	ADNP	HLTF	8952	127	195	17	2.76642	5.75573e-09	0.000623006
NFYB	ENCFF396GUH	ENCFF558DSF	ADNP	HMBOX1	8952	127	512	37	7.26363	3.71016e-15	4.01592e-10
NFYB	ENCFF396GUH	ENCFF002CWT	ADNP	HMGN3	8952	127	1513	38	21.4646	0.00036727	1
NFYB	ENCFF396GUH	ENCFF292JRY	ADNP	HNRNPH1	8952	127	15	0	0.212802	0.808316	1
NFYB	ENCFF396GUH	ENCFF777CWV	ADNP	HNRNPK	8952	127	381	5	5.40516	0.172755	1
NFYB	ENCFF396GUH	ENCFF010STZ	ADNP	HNRNPL	8952	127	398	5	5.64634	0.168842	1
NFYB	ENCFF396GUH	ENCFF122QSN	ADNP	HNRNPLL	8952	127	1631	21	23.1386	0.078301	1
NFYB	ENCFF396GUH	ENCFF768TJI	ADNP	HNRNPUL1	8952	127	26	2	0.368856	0.0470427	1
NFYB	ENCFF396GUH	ENCFF835YLR	ADNP	ID3	8952	127	578	36	8.19996	5.82751e-13	6.30775e-08
NFYB	ENCFF396GUH	ENCFF415YPX	ADNP	ILF3	8952	127	112	10	1.58892	5.77026e-06	0.624578
NFYB	ENCFF396GUH	ENCFF176NOI	ADNP	ILK	8952	127	11	1	0.156055	0.133507	1
NFYB	ENCFF396GUH	ENCFF388AJH	ADNP	IRF1	8952	127	182	6	2.58199	0.0311209	1
NFYB	ENCFF396GUH	ENCFF284VUQ	ADNP	IRF1_0	8952	127	3230	57	45.8233	0.0149063	1
NFYB	ENCFF396GUH	ENCFF909LKK	ADNP	IRF1_1	8952	127	1104	28	15.6622	0.00147819	1
NFYB	ENCFF396GUH	ENCFF908UIY	ADNP	IRF1_2	8952	127	1228	30	17.4214	0.00174904	1
NFYB	ENCFF396GUH	ENCFF730RUF	ADNP	IRF1_3	8952	127	70	5	0.993074	0.00298154	1
NFYB	ENCFF396GUH	ENCFF384YDT	ADNP	IRF2	8952	127	787	23	11.165	0.000690803	1
NFYB	ENCFF396GUH	ENCFF196DHR	ADNP	IRF9	8952	127	162	11	2.29826	2.37744e-05	1
NFYB	ENCFF396GUH	ENCFF629BFI	ADNP	JUN	8952	127	1372	49	19.4643	8.61643e-09	0.000932651
NFYB	ENCFF396GUH	ENCFF417QAJ	ADNP	JUN_0	8952	127	290	21	4.11416	2.53987e-09	0.000274918
NFYB	ENCFF396GUH	ENCFF573GQX	ADNP	JUN_1	8952	127	193	10	2.73805	0.000422209	1
NFYB	ENCFF396GUH	ENCFF192BTP	ADNP	JUN_2	8952	127	185	12	2.62455	1.61621e-05	1
NFYB	ENCFF396GUH	ENCFF077UYM	ADNP	JUN_3	8952	127	495	27	7.02245	5.86683e-09	0.000635031
NFYB	ENCFF396GUH	ENCFF426DUB	ADNP	JUNB	8952	127	204	9	2.8941	0.00217255	1
NFYB	ENCFF396GUH	ENCFF337DKJ	ADNP	JUND	8952	127	2322	68	32.9417	3.20529e-08	0.00346944
NFYB	ENCFF396GUH	ENCFF772QPO	ADNP	KAT8	8952	127	66	3	0.936327	0.0536401	1
NFYB	ENCFF396GUH	ENCFF838COI_ENCFF738WCE	ADNP	KDM1A	8952	127	357	42	5.06468	1.75363e-24	1.89815e-19
NFYB	ENCFF396GUH	ENCFF042RAK	ADNP	KDM4B	8952	127	695	19	9.85981	0.00328357	1
NFYB	ENCFF396GUH	ENCFF368TYM	ADNP	KDM5B	8952	127	1661	35	23.5642	0.00603693	1
NFYB	ENCFF396GUH	ENCFF962VSZ	ADNP	KHSRP	8952	127	308	15	4.36953	3.9116e-05	1
NFYB	ENCFF396GUH	ENCFF717TWA	ADNP	KLF1	8952	127	712	24	10.101	8.41822e-05	1
NFYB	ENCFF396GUH	ENCFF802XZN	ADNP	KLF13	8952	127	655	17	9.29234	0.00743781	1
NFYB	ENCFF396GUH	ENCFF844HBQ	ADNP	KLF16	8952	127	524	38	7.43387	1.44264e-15	1.56153e-10
NFYB	ENCFF396GUH	ENCFF314ULQ	ADNP	L3MBTL2	8952	127	2628	75	37.2828	1.89161e-08	0.0020475
NFYB	ENCFF396GUH	ENCFF511OXK	ADNP	LARP7	8952	127	85	6	1.20588	0.00127873	1
NFYB	ENCFF396GUH	ENCFF659WAF	ADNP	LEF1	8952	127	684	54	9.70375	5.21365e-23	5.64331e-18
NFYB	ENCFF396GUH	ENCFF308IXJ	ADNP	MAFF	8952	127	384	21	5.44772	2.43362e-07	0.0263418
NFYB	ENCFF396GUH	ENCFF927JBT	ADNP	MAFG	8952	127	569	23	8.07227	8.76329e-06	0.948548
NFYB	ENCFF396GUH	ENCFF812QPN	ADNP	MAFK	8952	127	603	31	8.55462	1.85345e-09	0.00020062
NFYB	ENCFF396GUH	ENCFF799HIG_ENCFF422NGZ	ADNP	MAX	8952	127	2485	57	35.2541	0.000187307	1
NFYB	ENCFF396GUH	ENCFF470MLY	ADNP	MBD2	8952	127	2937	58	41.6666	0.00302659	1
NFYB	ENCFF396GUH	ENCFF226CZE	ADNP	MCM2	8952	127	10	0	0.141868	0.867736	1
NFYB	ENCFF396GUH	ENCFF679ITJ	ADNP	MCM3	8952	127	7	0	0.0993074	0.905464	1
NFYB	ENCFF396GUH	ENCFF920RYJ	ADNP	MCM5	8952	127	1	0	0.0141868	0.985913	1
NFYB	ENCFF396GUH	ENCFF577UJR	ADNP	MEF2A	8952	127	40	2	0.567471	0.0912868	1
NFYB	ENCFF396GUH	ENCFF257RYT	ADNP	MEF2D	8952	127	295	21	4.1851	3.38774e-09	0.000366692
NFYB	ENCFF396GUH	ENCFF613RNG	ADNP	MEIS2	8952	127	2014	63	28.5722	1.04339e-08	0.00112938
NFYB	ENCFF396GUH	ENCFF670ZCR	ADNP	MGA	8952	127	1391	42	19.7338	4.79615e-06	0.51914
NFYB	ENCFF396GUH	ENCFF365NKO	ADNP	MIER1	8952	127	112	9	1.58892	3.63156e-05	1
NFYB	ENCFF396GUH	ENCFF497XOD	ADNP	MITF	8952	127	1452	47	20.5992	2.46705e-07	0.0267036
NFYB	ENCFF396GUH	ENCFF973OME_ENCFF059ONJ	ADNP	MNT	8952	127	1653	45	23.4507	2.48145e-05	1
NFYB	ENCFF396GUH	ENCFF769GYG	ADNP	MTA1	8952	127	635	44	9.0086	4.65521e-17	5.03884e-12
NFYB	ENCFF396GUH	ENCFF350YXB	ADNP	MTA3	8952	127	2033	67	28.8417	5.41581e-10	5.86213e-05
NFYB	ENCFF396GUH	ENCFF970LCB	ADNP	MXI1	8952	127	1084	28	15.3785	0.00117663	1
NFYB	ENCFF396GUH	ENCFF877ANE	ADNP	MYBL2	8952	127	512	19	7.26363	0.000132517	1
NFYB	ENCFF396GUH	ENCFF465JKF	ADNP	MYC	8952	127	2224	59	31.5514	3.95796e-06	0.428413
NFYB	ENCFF396GUH	ENCFF099SDW	ADNP	MYC_0	8952	127	1616	48	22.9258	1.75846e-06	0.190337
NFYB	ENCFF396GUH	ENCFF634AYU	ADNP	MYC_1	8952	127	778	31	11.0373	4.17154e-07	0.0451531
NFYB	ENCFF396GUH	ENCFF676YJE	ADNP	MYC_2	8952	127	2518	68	35.7223	4.91386e-07	0.0531882
NFYB	ENCFF396GUH	ENCFF387LTN	ADNP	MYC_3	8952	127	1137	39	16.1304	6.07027e-07	0.0657052
NFYB	ENCFF396GUH	ENCFF583DZD	ADNP	MYNN	8952	127	659	32	9.34908	3.83869e-09	0.000415503
NFYB	ENCFF396GUH	ENCFF074EZL	ADNP	NBN	8952	127	791	53	11.2217	1.40839e-19	1.52446e-14
NFYB	ENCFF396GUH	ENCFF495CSO	ADNP	NCOA4	8952	127	30	7	0.425603	3.27919e-07	0.0354943
NFYB	ENCFF396GUH	ENCFF322DSX	ADNP	NCOA6	8952	127	148	9	2.09964	0.000267721	1
NFYB	ENCFF396GUH	ENCFF165BCW_ENCFF366UBB	ADNP	NCOR1	8952	127	450	43	6.38405	1.1626e-21	1.25841e-16
NFYB	ENCFF396GUH	ENCFF002CXG	ADNP	NELFE	8952	127	74	1	1.04982	0.367438	1
NFYB	ENCFF396GUH	ENCFF581YKY	ADNP	NEUROD1	8952	127	2218	50	31.4663	0.000554064	1
NFYB	ENCFF396GUH	ENCFF495MHZ	ADNP	NFE2	8952	127	669	40	9.49095	1.14519e-13	1.23957e-08
NFYB	ENCFF396GUH	ENCFF175IUO	ADNP	NFE2L1	8952	127	58	4	0.822833	0.00838849	1
NFYB	ENCFF396GUH	ENCFF370ENX	ADNP	NFIC	8952	127	926	59	13.137	1.39269e-20	1.50746e-15
NFYB	ENCFF396GUH	ENCFF157UUF	ADNP	NFRKB	8952	127	698	19	9.90237	0.0034151	1
NFYB	ENCFF396GUH	ENCFF986MHU	ADNP	NFXL1	8952	127	52	4	0.737712	0.00590136	1
NFYB	ENCFF396GUH	ENCFF012VES	ADNP	NFYA	8952	127	3615	62	51.2852	0.0177309	1
NFYB	ENCFF396GUH	ENCFF113PMT	ADNP	NFYB	8952	127	8952	127	127	0.0353772	1
NFYB	ENCFF396GUH	ENCFF906PGD	ADNP	NKRF	8952	127	538	19	7.63248	0.000234862	1
NFYB	ENCFF396GUH	ENCFF776YPS	ADNP	NONO	8952	127	511	29	7.24944	7.14333e-10	7.73201e-05
NFYB	ENCFF396GUH	ENCFF954NAJ	ADNP	NR0B1	8952	127	0	0	0	1	1
NFYB	ENCFF396GUH	ENCFF664ZGR	ADNP	NR2C1	8952	127	907	33	12.8674	1.21976e-06	0.132028
NFYB	ENCFF396GUH	ENCFF594LCH	ADNP	NR2C2	8952	127	79	0	1.12076	0.326034	1
NFYB	ENCFF396GUH	ENCFF175IIE	ADNP	NR2F1	8952	127	868	46	12.3141	1.17498e-13	1.27181e-08
NFYB	ENCFF396GUH	ENCFF255EOB	ADNP	NR2F2	8952	127	769	38	10.9096	9.55581e-11	1.03433e-05
NFYB	ENCFF396GUH	ENCFF712AXK	ADNP	NR2F6	8952	127	484	29	6.8664	2.17052e-10	2.34939e-05
NFYB	ENCFF396GUH	ENCFF859NPS	ADNP	NR4A1	8952	127	419	32	5.94426	5.88024e-14	6.36483e-09
NFYB	ENCFF396GUH	ENCFF144PPR_ENCFF493ABN	ADNP	NRF1	8952	127	1920	36	27.2386	0.0184733	1
NFYB	ENCFF396GUH	ENCFF289BUU	ADNP	NUFIP1	8952	127	102	13	1.44705	4.60854e-09	0.000498833
NFYB	ENCFF396GUH	ENCFF168HAG	ADNP	PBX2	8952	127	1779	42	25.2383	0.000599768	1
NFYB	ENCFF396GUH	ENCFF941RVL	ADNP	PCBP1	8952	127	622	8	8.82417	0.134147	1
NFYB	ENCFF396GUH	ENCFF881XQF	ADNP	PCBP2	8952	127	37	1	0.524911	0.310541	1
NFYB	ENCFF396GUH	ENCFF462FRU	ADNP	PHB2	8952	127	94	19	1.33356	5.14005e-16	5.56364e-11
NFYB	ENCFF396GUH	ENCFF948YVM	ADNP	PHF20	8952	127	727	24	10.3138	0.00011223	1
NFYB	ENCFF396GUH	ENCFF134CUM	ADNP	PHF21A	8952	127	549	25	7.78854	5.16695e-07	0.0559276
NFYB	ENCFF396GUH	ENCFF626KTJ	ADNP	PHF8	8952	127	1055	22	14.967	0.0200504	1
NFYB	ENCFF396GUH	ENCFF544XKC	ADNP	PKNOX1	8952	127	3439	68	48.7883	0.00166925	1
NFYB	ENCFF396GUH	ENCFF881QBT	ADNP	PML	8952	127	1497	47	21.2376	5.4691e-07	0.0591981
NFYB	ENCFF396GUH	ENCFF662YQK	ADNP	POLR2A_0	8952	127	2114	41	29.9908	0.0101683	1
NFYB	ENCFF396GUH	ENCFF853ZMA	ADNP	POLR2A_1	8952	127	2334	41	33.1119	0.0259781	1
NFYB	ENCFF396GUH	ENCFF206YXX	ADNP	POLR2A_2	8952	127	2119	38	30.0618	0.0245681	1
NFYB	ENCFF396GUH	ENCFF270QAB	ADNP	POLR2A_3	8952	127	2363	39	33.5233	0.0416829	1
NFYB	ENCFF396GUH	ENCFF296CNQ	ADNP	POLR2AphosphoS2	8952	127	671	13	9.51933	0.0621455	1
NFYB	ENCFF396GUH	ENCFF542DOG	ADNP	POLR2AphosphoS5	8952	127	2039	48	28.9268	0.000306034	1
NFYB	ENCFF396GUH	ENCFF872JJJ	ADNP	POLR2B	8952	127	1396	20	19.8047	0.0887501	1
NFYB	ENCFF396GUH	ENCFF273EYJ	ADNP	POLR2G	8952	127	2355	37	33.4099	0.0543134	1
NFYB	ENCFF396GUH	ENCFF801YZV	ADNP	POLR2H	8952	127	1563	32	22.1739	0.0103939	1
NFYB	ENCFF396GUH	ENCFF002CXW	ADNP	POLR3A	8952	127	16	7	0.226988	4.90925e-09	0.000531382
NFYB	ENCFF396GUH	ENCFF002CXT	ADNP	POLR3G	8952	127	5	3	0.0709339	5.5412e-05	1
NFYB	ENCFF396GUH	ENCFF990CFV	ADNP	POU5F1	8952	127	302	8	4.28441	0.038807	1
NFYB	ENCFF396GUH	ENCFF294HEI	ADNP	PRDM10	8952	127	1321	39	18.7407	1.54915e-05	1
NFYB	ENCFF396GUH	ENCFF785ACI	ADNP	PRPF4	8952	127	469	9	6.6536	0.0908082	1
NFYB	ENCFF396GUH	ENCFF694BIA	ADNP	PTBP1	8952	127	157	19	2.22732	3.59314e-12	3.88925e-07
NFYB	ENCFF396GUH	ENCFF007DKB	ADNP	PTRF	8952	127	51	1	0.723525	0.350938	1
NFYB	ENCFF396GUH	ENCFF332DRG	ADNP	PTTG1	8952	127	42	2	0.595845	0.0978282	1
NFYB	ENCFF396GUH	ENCFF421KIV	ADNP	PYGO2	8952	127	78	10	1.10657	2.50867e-07	0.0271541
NFYB	ENCFF396GUH	ENCFF002CXU	ADNP	RAD21	8952	127	149	6	2.11383	0.0149645	1
NFYB	ENCFF396GUH	ENCFF096XMD	ADNP	RAD51	8952	127	2127	47	30.1753	0.00106166	1
NFYB	ENCFF396GUH	ENCFF975IRM	ADNP	RB1	8952	127	1520	33	21.5639	0.00511955	1
NFYB	ENCFF396GUH	ENCFF379MPS	ADNP	RBBP5	8952	127	894	19	12.683	0.0233325	1
NFYB	ENCFF396GUH	ENCFF120IDE	ADNP	RBFOX2	8952	127	2507	39	35.5662	0.0542842	1
NFYB	ENCFF396GUH	ENCFF682SIY	ADNP	RBM14	8952	127	97	3	1.37612	0.109692	1
NFYB	ENCFF396GUH	ENCFF971VJZ	ADNP	RBM15	8952	127	15	0	0.212802	0.808316	1
NFYB	ENCFF396GUH	ENCFF861YKK	ADNP	RBM17	8952	127	0	0	0	1	1
NFYB	ENCFF396GUH	ENCFF522JUV	ADNP	RBM22	8952	127	421	6	5.97263	0.160613	1
NFYB	ENCFF396GUH	ENCFF680WBN	ADNP	RBM25	8952	127	3467	59	49.1855	0.0206718	1
NFYB	ENCFF396GUH	ENCFF782GWS	ADNP	RBM34	8952	127	121	0	1.7166	0.179676	1
NFYB	ENCFF396GUH	ENCFF209JJD	ADNP	RBM39	8952	127	81	5	1.14913	0.00529178	1
NFYB	ENCFF396GUH	ENCFF484CKD	ADNP	RCOR1	8952	127	331	25	4.69582	3.65406e-11	3.95519e-06
NFYB	ENCFF396GUH	ENCFF580QGA	ADNP	RELA	8952	127	141	12	2.00034	1.15921e-06	0.125474
NFYB	ENCFF396GUH	ENCFF237UAN_ENCFF010UHD	ADNP	RFX1	8952	127	750	14	10.6401	0.0654474	1
NFYB	ENCFF396GUH	ENCFF716LRI	ADNP	RFX5	8952	127	575	12	8.15739	0.0519481	1
NFYB	ENCFF396GUH	ENCFF209HKW	ADNP	RLF	8952	127	270	26	3.83043	7.85741e-14	8.50494e-09
NFYB	ENCFF396GUH	ENCFF478MPX	ADNP	SAFB	8952	127	329	1	4.66745	0.0438563	1
NFYB	ENCFF396GUH	ENCFF624NUZ	ADNP	SAFB2	8952	127	2	0	0.0283735	0.972025	1
NFYB	ENCFF396GUH	ENCFF718NUA	ADNP	SAP30	8952	127	676	11	9.59026	0.108139	1
NFYB	ENCFF396GUH	ENCFF294EHN	ADNP	SETDB1	8952	127	286	9	4.05742	0.0142027	1
NFYB	ENCFF396GUH	ENCFF757ODD	ADNP	SFPQ	8952	127	10	0	0.141868	0.867736	1
NFYB	ENCFF396GUH	ENCFF191MPD	ADNP	SIN3A	8952	127	1094	25	15.5203	0.006942	1
NFYB	ENCFF396GUH	ENCFF280GTU	ADNP	SIN3B	8952	127	744	15	10.555	0.0448114	1
NFYB	ENCFF396GUH	ENCFF002CXZ	ADNP	SIRT6	8952	127	107	18	1.51798	6.26932e-14	6.78597e-09
NFYB	ENCFF396GUH	ENCFF033EBX_ENCFF002CMM	ADNP	SIX5	8952	127	637	5	9.03697	0.0597346	1
NFYB	ENCFF396GUH	ENCFF481WGW	ADNP	SKIL	8952	127	1358	53	19.2656	1.24634e-10	1.34905e-05
NFYB	ENCFF396GUH	ENCFF315YAF	ADNP	SMAD1	8952	127	815	29	11.5622	7.24851e-06	0.784586
NFYB	ENCFF396GUH	ENCFF011KRN	ADNP	SMAD2	8952	127	14	0	0.198615	0.819866	1
NFYB	ENCFF396GUH	ENCFF178MOP	ADNP	SMAD5	8952	127	2109	36	29.9199	0.0371521	1
NFYB	ENCFF396GUH	ENCFF995NIE	ADNP	SMARCA5	8952	127	88	16	1.24844	4.77587e-13	5.16945e-08
NFYB	ENCFF396GUH	ENCFF944GJH	ADNP	SMARCB1	8952	127	77	12	1.09238	2.02181e-09	0.000218843
NFYB	ENCFF396GUH	ENCFF114PTZ	ADNP	SMARCC2	8952	127	259	34	3.67437	1.41355e-21	1.53004e-16
NFYB	ENCFF396GUH	ENCFF622RBW	ADNP	SMARCE1	8952	127	489	50	6.93733	3.66189e-26	3.96367e-21
NFYB	ENCFF396GUH	ENCFF041YQC	ADNP	SMC3	8952	127	438	20	6.21381	6.0591e-06	0.655844
NFYB	ENCFF396GUH	ENCFF494ZUY	ADNP	SNIP1	8952	127	103	4	1.46124	0.0440621	1
NFYB	ENCFF396GUH	ENCFF033KXY	ADNP	SNRNP70	8952	127	3	0	0.0425603	0.958333	1
NFYB	ENCFF396GUH	ENCFF241TBP	ADNP	SOX6	8952	127	1337	62	18.9677	3.17294e-15	3.43443e-10
NFYB	ENCFF396GUH	ENCFF300XUA	ADNP	SP1	8952	127	2565	38	36.3891	0.0623453	1
NFYB	ENCFF396GUH	ENCFF002CMJ	ADNP	SPI1	8952	127	872	23	12.3709	0.00218831	1
NFYB	ENCFF396GUH	ENCFF985TSH	ADNP	SREBF1	8952	127	462	17	6.55429	0.000304351	1
NFYB	ENCFF396GUH	ENCFF798URE	ADNP	SRSF1	8952	127	94	1	1.33356	0.351443	1
NFYB	ENCFF396GUH	ENCFF722XRW	ADNP	SRSF3	8952	127	23	0	0.326296	0.721592	1
NFYB	ENCFF396GUH	ENCFF059WVE	ADNP	SRSF7	8952	127	3	0	0.0425603	0.958333	1
NFYB	ENCFF396GUH	ENCFF137IBM	ADNP	SRSF9	8952	127	0	0	0	1	1
NFYB	ENCFF396GUH	ENCFF290HTJ	ADNP	STAT1_0	8952	127	77	5	1.09238	0.00434786	1
NFYB	ENCFF396GUH	ENCFF254MPF	ADNP	STAT1_1	8952	127	79	4	1.12076	0.0214335	1
NFYB	ENCFF396GUH	ENCFF498DOQ	ADNP	STAT1_2	8952	127	44	2	0.624218	0.104363	1
NFYB	ENCFF396GUH	ENCFF648NYF	ADNP	STAT1_3	8952	127	195	9	2.76642	0.0016446	1
NFYB	ENCFF396GUH	ENCFF841YFF	ADNP	STAT2_0	8952	127	112	9	1.58892	3.63156e-05	1
NFYB	ENCFF396GUH	ENCFF714VIT	ADNP	STAT2_1	8952	127	248	17	3.51832	1.61676e-07	0.0175
NFYB	ENCFF396GUH	ENCFF696KPD	ADNP	STAT5A	8952	127	409	42	5.80239	2.53436e-22	2.74321e-17
NFYB	ENCFF396GUH	ENCFF484HCG	ADNP	SUPT5H	8952	127	1504	26	21.3369	0.0484505	1
NFYB	ENCFF396GUH	ENCFF822FWM	ADNP	TAF1	8952	127	2161	43	30.6576	0.00669223	1
NFYB	ENCFF396GUH	ENCFF617CAZ	ADNP	TAF15	8952	127	30	0	0.425603	0.653376	1
NFYB	ENCFF396GUH	ENCFF034CQR	ADNP	TAF7	8952	127	37	2	0.524911	0.0815033	1
NFYB	ENCFF396GUH	ENCFF785HXY	ADNP	TAF9B	8952	127	1088	37	15.4352	1.35769e-06	0.146958
NFYB	ENCFF396GUH	ENCFF284LRP_ENCFF482CEV	ADNP	TAL1	8952	127	296	35	4.19929	9.4011e-21	1.01758e-15
NFYB	ENCFF396GUH	ENCFF626MVT	ADNP	TBL1XR1	8952	127	1010	39	14.3286	3.62711e-08	0.00392602
NFYB	ENCFF396GUH	ENCFF380FJL	ADNP	TBP	8952	127	2571	58	36.4742	0.000241801	1
NFYB	ENCFF396GUH	ENCFF249EZR	ADNP	TCF7	8952	127	387	20	5.49028	1.05043e-06	0.1137
NFYB	ENCFF396GUH	ENCFF312RFN	ADNP	TCF7L2	8952	127	222	4	3.14946	0.175768	1
NFYB	ENCFF396GUH	ENCFF619BDC	ADNP	TEAD2	8952	127	142	8	2.01452	0.000897345	1
NFYB	ENCFF396GUH	ENCFF209MQX	ADNP	TEAD4	8952	127	1125	59	15.9601	8.04856e-17	8.71184e-12
NFYB	ENCFF396GUH	ENCFF701MXF	ADNP	TFDP1	8952	127	1406	38	19.9466	0.000103229	1
NFYB	ENCFF396GUH	ENCFF641LJY	ADNP	THAP1	8952	127	728	17	10.328	0.015915	1
NFYB	ENCFF396GUH	ENCFF671BFH	ADNP	THRA	8952	127	30	0	0.425603	0.653376	1
NFYB	ENCFF396GUH	ENCFF294VWT	ADNP	THRAP3	8952	127	24	4	0.340483	0.000398381	1
NFYB	ENCFF396GUH	ENCFF262BVP	ADNP	TOE1	8952	127	1364	56	19.3508	6.2993e-12	6.81842e-07
NFYB	ENCFF396GUH	ENCFF049CRW_ENCFF646VQW	ADNP	TRIM24	8952	127	277	33	3.92974	9.30345e-20	1.00702e-14
NFYB	ENCFF396GUH	ENCFF561IZB	ADNP	TRIP13	8952	127	251	1	3.56088	0.101178	1
NFYB	ENCFF396GUH	ENCFF036YVI	ADNP	TSC22D4	8952	127	8	0	0.113494	0.892709	1
NFYB	ENCFF396GUH	ENCFF730URE	ADNP	U2AF1	8952	127	234	2	3.31971	0.199269	1
NFYB	ENCFF396GUH	ENCFF398EQF	ADNP	U2AF2	8952	127	0	0	0	1	1
NFYB	ENCFF396GUH	ENCFF671DOL	ADNP	UBTF	8952	127	903	26	12.8107	0.000424267	1
NFYB	ENCFF396GUH	ENCFF334FMW	ADNP	USF1	8952	127	2749	49	38.9994	0.0173986	1
NFYB	ENCFF396GUH	ENCFF150VTD	ADNP	USF2	8952	127	1020	24	14.4705	0.005949	1
NFYB	ENCFF396GUH	ENCFF186QUP	ADNP	VEZF1	8952	127	2580	67	36.6019	1.98054e-06	0.214375
NFYB	ENCFF396GUH	ENCFF803LEC	ADNP	XRCC3	8952	127	7	1	0.0993074	0.0899193	1
NFYB	ENCFF396GUH	ENCFF998KKJ	ADNP	XRCC5	8952	127	805	28	11.4204	1.48282e-05	1
NFYB	ENCFF396GUH	ENCFF706LIT	ADNP	YBX1	8952	127	3	2	0.0425603	0.000867953	1
NFYB	ENCFF396GUH	ENCFF246HIU	ADNP	YBX3	8952	127	165	0	2.34082	0.0962489	1
NFYB	ENCFF396GUH	ENCFF926FUM_ENCFF328XKC	ADNP	YY1	8952	127	1295	23	18.3719	0.0483316	1
NFYB	ENCFF396GUH	ENCFF253FON	ADNP	ZBED1	8952	127	411	25	5.83076	2.63162e-09	0.000284849
NFYB	ENCFF396GUH	ENCFF434QZL	ADNP	ZBTB11	8952	127	532	18	7.54736	0.00052023	1
NFYB	ENCFF396GUH	ENCFF561USY	ADNP	ZBTB2	8952	127	733	38	10.3989	2.57527e-11	2.78749e-06
NFYB	ENCFF396GUH	ENCFF408FQC	ADNP	ZBTB33	8952	127	476	20	6.7529	1.86611e-05	1
NFYB	ENCFF396GUH	ENCFF417LEJ	ADNP	ZBTB40	8952	127	1286	33	18.2442	0.000568951	1
NFYB	ENCFF396GUH	ENCFF706ISJ	ADNP	ZBTB7A	8952	127	1354	33	19.2089	0.00118734	1
NFYB	ENCFF396GUH	ENCFF589EVD	ADNP	ZBTB8A	8952	127	14	3	0.198615	0.0010706	1
NFYB	ENCFF396GUH	ENCFF522JRK	ADNP	ZC3H11A	8952	127	160	6	2.26988	0.0196287	1
NFYB	ENCFF396GUH	ENCFF809OEX	ADNP	ZC3H8	8952	127	273	29	3.87299	2.65941e-16	2.87858e-11
NFYB	ENCFF396GUH	ENCFF521CRG	ADNP	ZFP36	8952	127	420	31	5.95845	3.36031e-13	3.63723e-08
NFYB	ENCFF396GUH	ENCFF396DNK	ADNP	ZFP91	8952	127	377	17	5.34841	3.20605e-05	1
NFYB	ENCFF396GUH	ENCFF433RKB	ADNP	ZFX	8952	127	920	15	13.0518	0.0891731	1
NFYB	ENCFF396GUH	ENCFF195ODE	ADNP	ZHX1	8952	127	290	10	4.11416	0.00625597	1
NFYB	ENCFF396GUH	ENCFF163VUK	ADNP	ZKSCAN1	8952	127	665	27	9.4342	1.52348e-06	0.164903
NFYB	ENCFF396GUH	ENCFF529FWJ	ADNP	ZKSCAN8	8952	127	176	16	2.49687	8.98139e-09	0.000972155
NFYB	ENCFF396GUH	ENCFF597DIY	ADNP	ZMIZ1	8952	127	73	4	1.03563	0.0170155	1
NFYB	ENCFF396GUH	ENCFF511QHY	ADNP	ZMYM3	8952	127	80	24	1.13494	1.08084e-23	1.16992e-18
NFYB	ENCFF396GUH	ENCFF114IWY	ADNP	ZNF143	8952	127	1419	32	20.131	0.00363702	1
NFYB	ENCFF396GUH	ENCFF116DIO	ADNP	ZNF148	8952	127	844	26	11.9736	0.000169112	1
NFYB	ENCFF396GUH	ENCFF721LDD	ADNP	ZNF175	8952	127	526	26	7.46224	7.04976e-08	0.00763073
NFYB	ENCFF396GUH	ENCFF853TZC	ADNP	ZNF197	8952	127	375	14	5.32004	0.000816463	1
NFYB	ENCFF396GUH	ENCFF891MVM	ADNP	ZNF263	8952	127	94	2	1.33356	0.234335	1
NFYB	ENCFF396GUH	ENCFF344QKL	ADNP	ZNF274	8952	127	56	10	0.794459	1.24717e-08	0.00134995
NFYB	ENCFF396GUH	ENCFF386WKY	ADNP	ZNF280A	8952	127	31	2	0.43979	0.0622963	1
NFYB	ENCFF396GUH	ENCFF581ZZT	ADNP	ZNF282	8952	127	554	27	7.85947	5.31268e-08	0.0057505
NFYB	ENCFF396GUH	ENCFF921WMN	ADNP	ZNF318	8952	127	328	32	4.65326	8.45633e-17	9.15322e-12
NFYB	ENCFF396GUH	ENCFF744SVC	ADNP	ZNF354B	8952	127	134	3	1.90103	0.171084	1
NFYB	ENCFF396GUH	ENCFF706SJZ	ADNP	ZNF384	8952	127	618	26	8.76743	1.26302e-06	0.136711
NFYB	ENCFF396GUH	ENCFF388YOB	ADNP	ZNF395	8952	127	1005	41	14.2577	3.97709e-09	0.000430484
NFYB	ENCFF396GUH	ENCFF834WGJ	ADNP	ZNF507	8952	127	2	0	0.0283735	0.972025	1
NFYB	ENCFF396GUH	ENCFF447QUG	ADNP	ZNF512	8952	127	27	0	0.383043	0.681784	1
NFYB	ENCFF396GUH	ENCFF815TTY	ADNP	ZNF584	8952	127	348	25	4.937	1.00419e-10	1.08695e-05
NFYB	ENCFF396GUH	ENCFF602AXP	ADNP	ZNF589	8952	127	618	32	8.76743	8.79207e-10	9.51663e-05
NFYB	ENCFF396GUH	ENCFF273TYA	ADNP	ZNF592	8952	127	654	48	9.27815	2.06438e-19	2.2345e-14
NFYB	ENCFF396GUH	ENCFF173NRW	ADNP	ZNF644	8952	127	389	21	5.51866	2.97463e-07	0.0321977
NFYB	ENCFF396GUH	ENCFF248AOD	ADNP	ZNF766	8952	127	817	32	11.5906	3.95804e-07	0.0428422
NFYB	ENCFF396GUH	ENCFF654BMD	ADNP	ZNF83	8952	127	418	23	5.93007	6.20136e-08	0.00671241
NFYB	ENCFF396GUH	ENCFF996IVU	ADNP	ZNF830	8952	127	80	4	1.13494	0.0222221	1
NFYB	ENCFF396GUH	ENCFF253NXR	ADNP	ZSCAN29	8952	127	356	28	5.05049	1.03705e-12	1.12252e-07
NFYB	ENCFF396GUH	ENCFF588OLK	ADNP	ZZZ3	8952	127	153	5	2.17058	0.0458168	1
NFYB	ENCFF360BTO	ENCFF836VRV	AFF1	37104	8952	543	401	29	24.3234	0.0483778	1
NFYB	ENCFF360BTO	ENCFF396GUH	AFF1	ADNP	8952	543	127	36	7.70342	1.01046e-13	1.09373e-08
NFYB	ENCFF360BTO	ENCFF360BTO	AFF1	AFF1	8952	543	543	543	32.9367	0	0
NFYB	ENCFF360BTO	ENCFF010MMQ	AFF1	ARHGAP35	8952	543	85	20	5.15583	4.17542e-07	0.0451951
NFYB	ENCFF360BTO	ENCFF225MPC	AFF1	ARID1B	8952	543	675	211	40.9434	1.09744e-78	1.18788e-73
NFYB	ENCFF360BTO	ENCFF332ICQ	AFF1	ARID2	8952	543	79	15	4.79189	0.000102332	1
NFYB	ENCFF360BTO	ENCFF835KAT	AFF1	ARID3A	8952	543	570	138	34.5744	3.10956e-40	3.36582e-35
NFYB	ENCFF360BTO	ENCFF235ZZP	AFF1	ASH1L	8952	543	2325	235	141.027	1.2951e-13	1.40183e-08
NFYB	ENCFF360BTO	ENCFF002CVM	AFF1	ATF1	8952	543	1593	259	96.6263	1.01674e-42	1.10053e-37
NFYB	ENCFF360BTO	ENCFF968KBN	AFF1	ATF2	8952	543	826	176	50.1025	1.31708e-43	1.42562e-38
NFYB	ENCFF360BTO	ENCFF958KNK	AFF1	ATF3	8952	543	1033	215	62.6585	2.96509e-51	3.20944e-46
NFYB	ENCFF360BTO	ENCFF710IEF	AFF1	ATF4	8952	543	426	116	25.8398	1.18271e-38	1.28018e-33
NFYB	ENCFF360BTO	ENCFF868QLL	AFF1	ATF7	8952	543	2939	415	178.27	6.45812e-52	6.99034e-47
NFYB	ENCFF360BTO	ENCFF423EMU	AFF1	BACH1	8952	543	116	35	7.03619	3.86197e-14	4.18023e-09
NFYB	ENCFF360BTO	ENCFF057ZUY	AFF1	BCOR	8952	543	382	155	23.1709	6.65161e-73	7.19977e-68
NFYB	ENCFF360BTO	ENCFF002CVP	AFF1	BDP1	8952	543	13	5	0.788539	0.00115472	1
NFYB	ENCFF360BTO	ENCFF179NDS	AFF1	BHLHE40	8952	543	1665	274	100.994	5.63007e-46	6.09404e-41
NFYB	ENCFF360BTO	ENCFF048OIZ	AFF1	BMI1	8952	543	278	29	16.8626	0.00204616	1
NFYB	ENCFF360BTO	ENCFF549GMO	AFF1	BRCA1	8952	543	1	0	0.0606568	0.941146	1
NFYB	ENCFF360BTO	ENCFF714XHL	AFF1	BRD4	8952	543	160	41	9.70509	5.34185e-14	5.78207e-09
NFYB	ENCFF360BTO	ENCFF666LZV	AFF1	BRD9	8952	543	305	123	18.5003	5.54693e-58	6.00405e-53
NFYB	ENCFF360BTO	ENCFF002CVR	AFF1	BRF1	8952	543	10	4	0.606568	0.00307524	1
NFYB	ENCFF360BTO	ENCFF002CVS	AFF1	BRF2	8952	543	7	1	0.424598	0.277701	1
NFYB	ENCFF360BTO	ENCFF996ZGL	AFF1	C11orf30	8952	543	1723	275	104.512	7.53565e-44	8.15666e-39
NFYB	ENCFF360BTO	ENCFF642BNC	AFF1	CBFA2T2	8952	543	1271	192	77.0948	1.89135e-28	2.04721e-23
NFYB	ENCFF360BTO	ENCFF993GXU	AFF1	CBFA2T3	8952	543	635	171	38.5171	2.1145e-55	2.28875e-50
NFYB	ENCFF360BTO	ENCFF484DKT	AFF1	CBX1	8952	543	963	176	58.4125	1.73928e-35	1.88262e-30
NFYB	ENCFF360BTO	ENCFF455TDM	AFF1	CBX3	8952	543	1458	275	88.4377	8.1821e-57	8.85639e-52
NFYB	ENCFF360BTO	ENCFF062ARS	AFF1	CBX5	8952	543	211	61	12.7986	1.87513e-22	2.02966e-17
NFYB	ENCFF360BTO	ENCFF456PQY	AFF1	CBX8	8952	543	3	0	0.181971	0.833626	1
NFYB	ENCFF360BTO	ENCFF874QUM	AFF1	CC2D1A	8952	543	1405	286	85.2229	1.53943e-65	1.66629e-60
NFYB	ENCFF360BTO	ENCFF583GKE	AFF1	CCAR2	8952	543	26	14	1.57708	1.39514e-09	0.000151012
NFYB	ENCFF360BTO	ENCFF002CVU	AFF1	CCNT2	8952	543	1787	231	108.394	5.72514e-25	6.19695e-20
NFYB	ENCFF360BTO	ENCFF643TEZ	AFF1	CDC5L	8952	543	74	35	4.48861	7.24924e-20	7.84665e-15
NFYB	ENCFF360BTO	ENCFF813LOW_ENCFF429XKT	AFF1	CEBPB	8952	543	594	139	36.0302	5.57083e-39	6.02992e-34
NFYB	ENCFF360BTO	ENCFF925MHB	AFF1	CEBPZ	8952	543	593	46	35.9695	0.0162577	1
NFYB	ENCFF360BTO	ENCFF859FVX	AFF1	CHAMP1	8952	543	684	170	41.4893	1.47826e-50	1.60008e-45
NFYB	ENCFF360BTO	ENCFF684MLP	AFF1	COPS2	8952	543	11	0	0.667225	0.51313	1
NFYB	ENCFF360BTO	ENCFF665FHC	AFF1	CREB3	8952	543	330	87	20.0168	1.60053e-28	1.73243e-23
NFYB	ENCFF360BTO	ENCFF582YPB	AFF1	CREB3L1	8952	543	1553	284	94.2001	4.91273e-56	5.31758e-51
NFYB	ENCFF360BTO	ENCFF948TXN	AFF1	CREM	8952	543	3223	417	195.497	1.98136e-43	2.14464e-38
NFYB	ENCFF360BTO	ENCFF117EWO	AFF1	CSDE1	8952	543	467	101	28.3267	2.48535e-26	2.69017e-21
NFYB	ENCFF360BTO	ENCFF152VMJ	AFF1	CTBP1	8952	543	2152	352	130.534	7.2501e-58	7.84758e-53
NFYB	ENCFF360BTO	ENCFF002DDJ_ENCFF002DBD	AFF1	CTCF	8952	543	445	47	26.9923	0.000135831	1
NFYB	ENCFF360BTO	ENCFF962FQM	AFF1	CTCFL	8952	543	434	65	26.3251	9.43746e-11	1.02152e-05
NFYB	ENCFF360BTO	ENCFF517YCC	AFF1	CUX1	8952	543	205	59	12.4347	1.09916e-21	1.18974e-16
NFYB	ENCFF360BTO	ENCFF526HLP	AFF1	DACH1	8952	543	492	115	29.8432	1.5146e-32	1.63942e-27
NFYB	ENCFF360BTO	ENCFF338HQY	AFF1	DDX20	8952	543	2080	296	126.166	3.161e-38	3.42149e-33
NFYB	ENCFF360BTO	ENCFF786WZD	AFF1	DEAF1	8952	543	775	109	47.009	4.92588e-15	5.33182e-10
NFYB	ENCFF360BTO	ENCFF408SNO	AFF1	DIDO1	8952	543	566	159	34.3318	6.25546e-54	6.77098e-49
NFYB	ENCFF360BTO	ENCFF034PQD	AFF1	DNMT1	8952	543	43	16	2.60824	1.61512e-08	0.00174823
NFYB	ENCFF360BTO	ENCFF774QKS_ENCFF823SYE	AFF1	DPF2	8952	543	347	150	21.0479	3.83261e-74	4.14846e-69
NFYB	ENCFF360BTO	ENCFF106DAY	AFF1	E2F1	8952	543	2426	361	147.153	3.15855e-50	3.41884e-45
NFYB	ENCFF360BTO	ENCFF225TLP	AFF1	E2F4	8952	543	1863	230	113.004	1.75647e-22	1.90122e-17
NFYB	ENCFF360BTO	ENCFF356ASJ	AFF1	E2F5	8952	543	1026	214	62.2339	3.63047e-51	3.92966e-46
NFYB	ENCFF360BTO	ENCFF417DTI_ENCFF917COW	AFF1	E2F6	8952	543	1561	188	94.6853	9.75333e-18	1.05571e-12
NFYB	ENCFF360BTO	ENCFF310AGG	AFF1	E2F7	8952	543	371	70	22.5037	6.39919e-16	6.92654e-11
NFYB	ENCFF360BTO	ENCFF925DJG	AFF1	E2F8	8952	543	1153	248	69.9373	2.50613e-61	2.71266e-56
NFYB	ENCFF360BTO	ENCFF083YCQ	AFF1	E4F1	8952	543	2631	424	159.588	1.54486e-67	1.67217e-62
NFYB	ENCFF360BTO	ENCFF806BDC	AFF1	EHMT2	8952	543	463	132	28.0841	8.94343e-46	9.68045e-41
NFYB	ENCFF360BTO	ENCFF502KHR	AFF1	ELF4	8952	543	1900	338	115.248	1.36315e-63	1.47549e-58
NFYB	ENCFF360BTO	ENCFF019PEL	AFF1	ELK1	8952	543	476	93	28.8727	1.67025e-21	1.8079e-16
NFYB	ENCFF360BTO	ENCFF549TYR	AFF1	EP300	8952	543	1149	287	69.6947	2.15064e-84	2.32787e-79
NFYB	ENCFF360BTO	ENCFF925ANU	AFF1	EP400	8952	543	1839	363	111.548	3.21752e-79	3.48268e-74
NFYB	ENCFF360BTO	ENCFF213EPU	AFF1	ESRRA	8952	543	1586	302	96.2017	4.9772e-63	5.38737e-58
NFYB	ENCFF360BTO	ENCFF076YZO	AFF1	ETS1	8952	543	976	186	59.2011	1.14269e-39	1.23685e-34
NFYB	ENCFF360BTO	ENCFF772HOY	AFF1	ETS2	8952	543	22	6	1.33445	0.00206508	1
NFYB	ENCFF360BTO	ENCFF404YMX	AFF1	ETV1	8952	543	948	233	57.5027	1.11684e-67	1.20888e-62
NFYB	ENCFF360BTO	ENCFF545VNY	AFF1	ETV6	8952	543	250	84	15.1642	1.20988e-34	1.30959e-29
NFYB	ENCFF360BTO	ENCFF820EVZ	AFF1	EWSR1	8952	543	10	4	0.606568	0.00307524	1
NFYB	ENCFF360BTO	ENCFF883WYX	AFF1	FIP1L1	8952	543	674	81	40.8827	1.0384e-08	0.00112397
NFYB	ENCFF360BTO	ENCFF002CVW	AFF1	FOS	8952	543	3625	326	219.881	4.73529e-12	5.12553e-07
NFYB	ENCFF360BTO	ENCFF473GCH	AFF1	FOSL1	8952	543	202	70	12.2527	5.97726e-30	6.46984e-25
NFYB	ENCFF360BTO	ENCFF809YFY	AFF1	FOXA1	8952	543	17	7	1.03117	8.77082e-05	1
NFYB	ENCFF360BTO	ENCFF452SPE	AFF1	FOXJ2	8952	543	719	158	43.6123	7.07393e-41	7.65689e-36
NFYB	ENCFF360BTO	ENCFF699ZII	AFF1	FOXM1	8952	543	1366	295	82.8572	6.43127e-73	6.96127e-68
NFYB	ENCFF360BTO	ENCFF142CPK	AFF1	FUS	8952	543	197	12	11.9494	0.114356	1
NFYB	ENCFF360BTO	ENCFF833FCO	AFF1	GABPA	8952	543	1778	251	107.848	3.08107e-32	3.33498e-27
NFYB	ENCFF360BTO	ENCFF517KRT	AFF1	GABPB1	8952	543	2338	327	141.816	1.33282e-40	1.44266e-35
NFYB	ENCFF360BTO	ENCFF632NQI	AFF1	GATA1	8952	543	472	131	28.63	3.03265e-44	3.28257e-39
NFYB	ENCFF360BTO	ENCFF732HOE	AFF1	GATA2	8952	543	327	113	19.8348	4.43234e-47	4.79761e-42
NFYB	ENCFF360BTO	ENCFF253FZN	AFF1	GATAD2A	8952	543	324	107	19.6528	5.9247e-43	6.41295e-38
NFYB	ENCFF360BTO	ENCFF549KOD	AFF1	GATAD2B	8952	543	474	118	28.7513	9.21385e-36	9.97317e-31
NFYB	ENCFF360BTO	ENCFF126BCK	AFF1	GMEB1	8952	543	1653	310	100.266	2.99725e-63	3.24426e-58
NFYB	ENCFF360BTO	ENCFF167HYX	AFF1	GTF2A2	8952	543	175	43	10.6149	5.28818e-14	5.72398e-09
NFYB	ENCFF360BTO	ENCFF002CWR	AFF1	GTF2B	8952	543	606	135	36.758	8.49039e-36	9.19008e-31
NFYB	ENCFF360BTO	ENCFF778RMG	AFF1	GTF2E2	8952	543	780	176	47.3123	8.94437e-47	9.68147e-42
NFYB	ENCFF360BTO	ENCFF002CYL	AFF1	GTF3C2	8952	543	36	12	2.18365	2.76379e-06	0.299155
NFYB	ENCFF360BTO	ENCFF474NLG	AFF1	HCFC1	8952	543	1895	280	114.945	6.2011e-39	6.71213e-34
NFYB	ENCFF360BTO	ENCFF580DYE	AFF1	HDAC3	8952	543	261	130	15.8314	1.78417e-71	1.9312e-66
NFYB	ENCFF360BTO	ENCFF998HOR	AFF1	HDAC6	8952	543	85	15	5.15583	0.000213222	1
NFYB	ENCFF360BTO	ENCFF939ZFS	AFF1	HDAC8	8952	543	232	53	14.0724	1.32132e-15	1.4302e-10
NFYB	ENCFF360BTO	ENCFF676NPW	AFF1	HES1	8952	543	504	153	30.571	4.7123e-56	5.10064e-51
NFYB	ENCFF360BTO	ENCFF265LKN	AFF1	HINFP	8952	543	226	43	13.7084	1.43167e-10	1.54966e-05
NFYB	ENCFF360BTO	ENCFF396NSO	AFF1	HLTF	8952	543	195	84	11.8281	2.93462e-42	3.17646e-37
NFYB	ENCFF360BTO	ENCFF558DSF	AFF1	HMBOX1	8952	543	512	126	31.0563	1.40649e-37	1.5224e-32
NFYB	ENCFF360BTO	ENCFF002CWT	AFF1	HMGN3	8952	543	1513	172	91.7738	2.52032e-14	2.72802e-09
NFYB	ENCFF360BTO	ENCFF292JRY	AFF1	HNRNPH1	8952	543	15	3	0.909853	0.050538	1
NFYB	ENCFF360BTO	ENCFF777CWV	AFF1	HNRNPK	8952	543	381	14	23.1103	0.0130678	1
NFYB	ENCFF360BTO	ENCFF010STZ	AFF1	HNRNPL	8952	543	398	39	24.1414	0.00136044	1
NFYB	ENCFF360BTO	ENCFF122QSN	AFF1	HNRNPLL	8952	543	1631	203	98.9313	1.88146e-20	2.03651e-15
NFYB	ENCFF360BTO	ENCFF768TJI	AFF1	HNRNPUL1	8952	543	26	9	1.57708	3.43557e-05	1
NFYB	ENCFF360BTO	ENCFF835YLR	AFF1	ID3	8952	543	578	172	35.0597	1.41705e-61	1.53383e-56
NFYB	ENCFF360BTO	ENCFF415YPX	AFF1	ILF3	8952	543	112	27	6.79357	3.01474e-09	0.000326318
NFYB	ENCFF360BTO	ENCFF176NOI	AFF1	ILK	8952	543	11	4	0.667225	0.00423747	1
NFYB	ENCFF360BTO	ENCFF388AJH	AFF1	IRF1	8952	543	182	37	11.0395	4.52942e-10	4.90269e-05
NFYB	ENCFF360BTO	ENCFF284VUQ	AFF1	IRF1_0	8952	543	3230	338	195.922	9.77649e-21	1.05822e-15
NFYB	ENCFF360BTO	ENCFF909LKK	AFF1	IRF1_1	8952	543	1104	211	66.9651	6.64728e-45	7.19508e-40
NFYB	ENCFF360BTO	ENCFF908UIY	AFF1	IRF1_2	8952	543	1228	229	74.4866	6.7409e-47	7.29642e-42
NFYB	ENCFF360BTO	ENCFF730RUF	AFF1	IRF1_3	8952	543	70	15	4.24598	2.87847e-05	1
NFYB	ENCFF360BTO	ENCFF384YDT	AFF1	IRF2	8952	543	787	164	47.7369	1.21178e-39	1.31164e-34
NFYB	ENCFF360BTO	ENCFF196DHR	AFF1	IRF9	8952	543	162	51	9.82641	1.42539e-20	1.54286e-15
NFYB	ENCFF360BTO	ENCFF629BFI	AFF1	JUN	8952	543	1372	264	83.2212	3.46353e-56	3.74896e-51
NFYB	ENCFF360BTO	ENCFF417QAJ	AFF1	JUN_0	8952	543	290	84	17.5905	2.7765e-30	3.00531e-25
NFYB	ENCFF360BTO	ENCFF573GQX	AFF1	JUN_1	8952	543	193	62	11.7068	4.58159e-25	4.95916e-20
NFYB	ENCFF360BTO	ENCFF192BTP	AFF1	JUN_2	8952	543	185	60	11.2215	1.61984e-24	1.75333e-19
NFYB	ENCFF360BTO	ENCFF077UYM	AFF1	JUN_3	8952	543	495	126	30.0251	5.60026e-39	6.06177e-34
NFYB	ENCFF360BTO	ENCFF426DUB	AFF1	JUNB	8952	543	204	57	12.374	1.95598e-20	2.11717e-15
NFYB	ENCFF360BTO	ENCFF337DKJ	AFF1	JUND	8952	543	2322	374	140.845	8.86645e-60	9.59714e-55
NFYB	ENCFF360BTO	ENCFF772QPO	AFF1	KAT8	8952	543	66	24	4.00335	8.44947e-12	9.14579e-07
NFYB	ENCFF360BTO	ENCFF838COI_ENCFF738WCE	AFF1	KDM1A	8952	543	357	115	21.6545	5.21737e-45	5.64733e-40
NFYB	ENCFF360BTO	ENCFF042RAK	AFF1	KDM4B	8952	543	695	134	42.1565	1.33052e-29	1.44016e-24
NFYB	ENCFF360BTO	ENCFF368TYM	AFF1	KDM5B	8952	543	1661	257	100.751	5.44702e-39	5.89591e-34
NFYB	ENCFF360BTO	ENCFF962VSZ	AFF1	KHSRP	8952	543	308	87	18.6823	1.50317e-30	1.62705e-25
NFYB	ENCFF360BTO	ENCFF717TWA	AFF1	KLF1	8952	543	712	124	43.1877	7.08888e-24	7.67307e-19
NFYB	ENCFF360BTO	ENCFF802XZN	AFF1	KLF13	8952	543	655	115	39.7302	1.50717e-22	1.63138e-17
NFYB	ENCFF360BTO	ENCFF844HBQ	AFF1	KLF16	8952	543	524	140	31.7842	2.3809e-45	2.57711e-40
NFYB	ENCFF360BTO	ENCFF314ULQ	AFF1	L3MBTL2	8952	543	2628	359	159.406	2.66804e-42	2.88791e-37
NFYB	ENCFF360BTO	ENCFF511OXK	AFF1	LARP7	8952	543	85	40	5.15583	2.19358e-22	2.37435e-17
NFYB	ENCFF360BTO	ENCFF659WAF	AFF1	LEF1	8952	543	684	228	41.4893	5.04188e-90	5.45738e-85
NFYB	ENCFF360BTO	ENCFF308IXJ	AFF1	MAFF	8952	543	384	87	23.2922	3.21996e-24	3.48531e-19
NFYB	ENCFF360BTO	ENCFF927JBT	AFF1	MAFG	8952	543	569	98	34.5137	5.75073e-19	6.22465e-14
NFYB	ENCFF360BTO	ENCFF812QPN	AFF1	MAFK	8952	543	603	125	36.5761	1.73809e-30	1.88132e-25
NFYB	ENCFF360BTO	ENCFF799HIG_ENCFF422NGZ	AFF1	MAX	8952	543	2485	336	150.732	6.69373e-39	7.24536e-34
NFYB	ENCFF360BTO	ENCFF470MLY	AFF1	MBD2	8952	543	2937	380	178.149	8.98841e-40	9.72915e-35
NFYB	ENCFF360BTO	ENCFF226CZE	AFF1	MCM2	8952	543	10	6	0.606568	3.77152e-05	1
NFYB	ENCFF360BTO	ENCFF679ITJ	AFF1	MCM3	8952	543	7	1	0.424598	0.277701	1
NFYB	ENCFF360BTO	ENCFF920RYJ	AFF1	MCM5	8952	543	1	0	0.0606568	0.941146	1
NFYB	ENCFF360BTO	ENCFF577UJR	AFF1	MEF2A	8952	543	40	14	2.42627	2.48331e-07	0.0268796
NFYB	ENCFF360BTO	ENCFF257RYT	AFF1	MEF2D	8952	543	295	127	17.8938	6.96644e-63	7.54054e-58
NFYB	ENCFF360BTO	ENCFF613RNG	AFF1	MEIS2	8952	543	2014	289	122.163	5.65901e-38	6.12536e-33
NFYB	ENCFF360BTO	ENCFF670ZCR	AFF1	MGA	8952	543	1391	213	84.3737	4.31988e-32	4.67588e-27
NFYB	ENCFF360BTO	ENCFF365NKO	AFF1	MIER1	8952	543	112	49	6.79357	1.09214e-25	1.18214e-20
NFYB	ENCFF360BTO	ENCFF497XOD	AFF1	MITF	8952	543	1452	173	88.0737	4.37659e-16	4.73727e-11
NFYB	ENCFF360BTO	ENCFF973OME_ENCFF059ONJ	AFF1	MNT	8952	543	1653	291	100.266	3.51739e-54	3.80726e-49
NFYB	ENCFF360BTO	ENCFF769GYG	AFF1	MTA1	8952	543	635	209	38.5171	9.36384e-82	1.01355e-76
NFYB	ENCFF360BTO	ENCFF350YXB	AFF1	MTA3	8952	543	2033	353	123.315	6.95464e-64	7.52777e-59
NFYB	ENCFF360BTO	ENCFF970LCB	AFF1	MXI1	8952	543	1084	172	65.752	6.24184e-28	6.75623e-23
NFYB	ENCFF360BTO	ENCFF877ANE	AFF1	MYBL2	8952	543	512	108	31.0563	3.48731e-27	3.7747e-22
NFYB	ENCFF360BTO	ENCFF465JKF	AFF1	MYC	8952	543	2224	359	134.901	1.1082e-57	1.19953e-52
NFYB	ENCFF360BTO	ENCFF099SDW	AFF1	MYC_0	8952	543	1616	314	98.0214	2.45213e-67	2.65421e-62
NFYB	ENCFF360BTO	ENCFF634AYU	AFF1	MYC_1	8952	543	778	173	47.191	3.2773e-45	3.54738e-40
NFYB	ENCFF360BTO	ENCFF676YJE	AFF1	MYC_2	8952	543	2518	386	152.734	1.54915e-56	1.67681e-51
NFYB	ENCFF360BTO	ENCFF387LTN	AFF1	MYC_3	8952	543	1137	238	68.9668	6.21874e-57	6.73122e-52
NFYB	ENCFF360BTO	ENCFF583DZD	AFF1	MYNN	8952	543	659	154	39.9729	6.6362e-43	7.18309e-38
NFYB	ENCFF360BTO	ENCFF074EZL	AFF1	NBN	8952	543	791	277	47.9796	8.46323e-114	9.16069e-109
NFYB	ENCFF360BTO	ENCFF495CSO	AFF1	NCOA4	8952	543	30	10	1.81971	1.77811e-05	1
NFYB	ENCFF360BTO	ENCFF322DSX	AFF1	NCOA6	8952	543	148	32	8.97721	1.51915e-09	0.000164435
NFYB	ENCFF360BTO	ENCFF165BCW_ENCFF366UBB	AFF1	NCOR1	8952	543	450	184	27.2956	1.09312e-86	1.18321e-81
NFYB	ENCFF360BTO	ENCFF002CXG	AFF1	NELFE	8952	543	74	16	4.48861	1.4581e-05	1
NFYB	ENCFF360BTO	ENCFF581YKY	AFF1	NEUROD1	8952	543	2218	315	134.537	2.20277e-40	2.3843e-35
NFYB	ENCFF360BTO	ENCFF495MHZ	AFF1	NFE2	8952	543	669	156	40.5794	2.50561e-43	2.7121e-38
NFYB	ENCFF360BTO	ENCFF175IUO	AFF1	NFE2L1	8952	543	58	11	3.5181	0.000759171	1
NFYB	ENCFF360BTO	ENCFF370ENX	AFF1	NFIC	8952	543	926	215	56.1682	1.20372e-58	1.30292e-53
NFYB	ENCFF360BTO	ENCFF157UUF	AFF1	NFRKB	8952	543	698	187	42.3385	4.52478e-60	4.89766e-55
NFYB	ENCFF360BTO	ENCFF986MHU	AFF1	NFXL1	8952	543	52	14	3.15416	4.72196e-06	0.51111
NFYB	ENCFF360BTO	ENCFF012VES	AFF1	NFYA	8952	543	3615	322	219.274	1.69265e-11	1.83214e-06
NFYB	ENCFF360BTO	ENCFF113PMT	AFF1	NFYB	8952	543	8952	543	543	0.0171176	1
NFYB	ENCFF360BTO	ENCFF906PGD	AFF1	NKRF	8952	543	538	146	32.6334	5.65098e-48	6.11668e-43
NFYB	ENCFF360BTO	ENCFF776YPS	AFF1	NONO	8952	543	511	99	30.9956	1.61259e-22	1.74549e-17
NFYB	ENCFF360BTO	ENCFF954NAJ	AFF1	NR0B1	8952	543	0	0	0	1	1
NFYB	ENCFF360BTO	ENCFF664ZGR	AFF1	NR2C1	8952	543	907	202	55.0158	1.51325e-52	1.63795e-47
NFYB	ENCFF360BTO	ENCFF594LCH	AFF1	NR2C2	8952	543	79	17	4.79189	8.63886e-06	0.935079
NFYB	ENCFF360BTO	ENCFF175IIE	AFF1	NR2F1	8952	543	868	224	52.6501	9.5467e-69	1.03334e-63
NFYB	ENCFF360BTO	ENCFF255EOB	AFF1	NR2F2	8952	543	769	200	46.6451	4.0422e-62	4.37532e-57
NFYB	ENCFF360BTO	ENCFF712AXK	AFF1	NR2F6	8952	543	484	141	29.3579	8.33556e-50	9.02249e-45
NFYB	ENCFF360BTO	ENCFF859NPS	AFF1	NR4A1	8952	543	419	106	25.4152	6.96566e-33	7.5397e-28
NFYB	ENCFF360BTO	ENCFF144PPR_ENCFF493ABN	AFF1	NRF1	8952	543	1920	212	116.461	5.98058e-16	6.47344e-11
NFYB	ENCFF360BTO	ENCFF289BUU	AFF1	NUFIP1	8952	543	102	43	6.187	3.67715e-22	3.98018e-17
NFYB	ENCFF360BTO	ENCFF168HAG	AFF1	PBX2	8952	543	1779	206	107.909	1.57478e-17	1.70456e-12
NFYB	ENCFF360BTO	ENCFF941RVL	AFF1	PCBP1	8952	543	622	53	37.7286	0.00352607	1
NFYB	ENCFF360BTO	ENCFF881XQF	AFF1	PCBP2	8952	543	37	1	2.2443	0.237899	1
NFYB	ENCFF360BTO	ENCFF462FRU	AFF1	PHB2	8952	543	94	53	5.70174	9.14626e-33	9.90001e-28
NFYB	ENCFF360BTO	ENCFF948YVM	AFF1	PHF20	8952	543	727	175	44.0975	3.71732e-50	4.02366e-45
NFYB	ENCFF360BTO	ENCFF134CUM	AFF1	PHF21A	8952	543	549	132	33.3006	2.83707e-38	3.07088e-33
NFYB	ENCFF360BTO	ENCFF626KTJ	AFF1	PHF8	8952	543	1055	161	63.993	1.30381e-24	1.41126e-19
NFYB	ENCFF360BTO	ENCFF544XKC	AFF1	PKNOX1	8952	543	3439	375	208.599	1.15118e-25	1.24605e-20
NFYB	ENCFF360BTO	ENCFF881QBT	AFF1	PML	8952	543	1497	306	90.8033	2.31738e-70	2.50835e-65
NFYB	ENCFF360BTO	ENCFF662YQK	AFF1	POLR2A_0	8952	543	2114	306	128.229	9.45504e-41	1.02342e-35
NFYB	ENCFF360BTO	ENCFF853ZMA	AFF1	POLR2A_1	8952	543	2334	313	141.573	9.00224e-36	9.74411e-31
NFYB	ENCFF360BTO	ENCFF206YXX	AFF1	POLR2A_2	8952	543	2119	313	128.532	3.03042e-43	3.28016e-38
NFYB	ENCFF360BTO	ENCFF270QAB	AFF1	POLR2A_3	8952	543	2363	327	143.332	9.47722e-40	1.02582e-34
NFYB	ENCFF360BTO	ENCFF296CNQ	AFF1	POLR2AphosphoS2	8952	543	671	105	40.7007	1.98677e-17	2.1505e-12
NFYB	ENCFF360BTO	ENCFF542DOG	AFF1	POLR2AphosphoS5	8952	543	2039	356	123.679	5.78379e-65	6.26043e-60
NFYB	ENCFF360BTO	ENCFF872JJJ	AFF1	POLR2B	8952	543	1396	249	84.6769	1.34015e-47	1.45059e-42
NFYB	ENCFF360BTO	ENCFF273EYJ	AFF1	POLR2G	8952	543	2355	267	142.847	6.00494e-21	6.4998e-16
NFYB	ENCFF360BTO	ENCFF801YZV	AFF1	POLR2H	8952	543	1563	266	94.8066	3.6079e-47	3.90523e-42
NFYB	ENCFF360BTO	ENCFF002CXW	AFF1	POLR3A	8952	543	16	10	0.970509	7.74012e-08	0.00837798
NFYB	ENCFF360BTO	ENCFF002CXT	AFF1	POLR3G	8952	543	5	4	0.303284	0.000260299	1
NFYB	ENCFF360BTO	ENCFF990CFV	AFF1	POU5F1	8952	543	302	54	18.3184	7.53354e-12	8.15438e-07
NFYB	ENCFF360BTO	ENCFF294HEI	AFF1	PRDM10	8952	543	1321	244	80.1277	3.76479e-49	4.07505e-44
NFYB	ENCFF360BTO	ENCFF785ACI	AFF1	PRPF4	8952	543	469	55	28.4481	3.26872e-06	0.35381
NFYB	ENCFF360BTO	ENCFF694BIA	AFF1	PTBP1	8952	543	157	38	9.52312	2.18402e-12	2.36401e-07
NFYB	ENCFF360BTO	ENCFF007DKB	AFF1	PTRF	8952	543	51	10	3.0935	0.00100288	1
NFYB	ENCFF360BTO	ENCFF332DRG	AFF1	PTTG1	8952	543	42	15	2.54759	7.39662e-08	0.00800617
NFYB	ENCFF360BTO	ENCFF421KIV	AFF1	PYGO2	8952	543	78	34	4.73123	2.65592e-18	2.8748e-13
NFYB	ENCFF360BTO	ENCFF002CXU	AFF1	RAD21	8952	543	149	14	9.03787	0.0330689	1
NFYB	ENCFF360BTO	ENCFF096XMD	AFF1	RAD51	8952	543	2127	211	129.017	9.25322e-12	1.00158e-06
NFYB	ENCFF360BTO	ENCFF975IRM	AFF1	RB1	8952	543	1520	218	92.1984	3.91412e-29	4.23668e-24
NFYB	ENCFF360BTO	ENCFF379MPS	AFF1	RBBP5	8952	543	894	143	54.2272	7.18684e-24	7.77911e-19
NFYB	ENCFF360BTO	ENCFF120IDE	AFF1	RBFOX2	8952	543	2507	297	152.067	9.19616e-26	9.95401e-21
NFYB	ENCFF360BTO	ENCFF682SIY	AFF1	RBM14	8952	543	97	12	5.88371	0.010005	1
NFYB	ENCFF360BTO	ENCFF971VJZ	AFF1	RBM15	8952	543	15	1	0.909853	0.366292	1
NFYB	ENCFF360BTO	ENCFF861YKK	AFF1	RBM17	8952	543	0	0	0	1	1
NFYB	ENCFF360BTO	ENCFF522JUV	AFF1	RBM22	8952	543	421	51	25.5365	3.04955e-06	0.330087
NFYB	ENCFF360BTO	ENCFF680WBN	AFF1	RBM25	8952	543	3467	237	210.297	0.00508679	1
NFYB	ENCFF360BTO	ENCFF782GWS	AFF1	RBM34	8952	543	121	4	7.33948	0.0785154	1
NFYB	ENCFF360BTO	ENCFF209JJD	AFF1	RBM39	8952	543	81	26	4.9132	1.72222e-11	1.86414e-06
NFYB	ENCFF360BTO	ENCFF484CKD	AFF1	RCOR1	8952	543	331	106	20.0774	2.03339e-41	2.20096e-36
NFYB	ENCFF360BTO	ENCFF580QGA	AFF1	RELA	8952	543	141	36	8.55261	1.86497e-12	2.01866e-07
NFYB	ENCFF360BTO	ENCFF237UAN_ENCFF010UHD	AFF1	RFX1	8952	543	750	72	45.4926	6.72296e-05	1
NFYB	ENCFF360BTO	ENCFF716LRI	AFF1	RFX5	8952	543	575	73	34.8777	6.43386e-09	0.000696408
NFYB	ENCFF360BTO	ENCFF209HKW	AFF1	RLF	8952	543	270	91	16.3773	1.78893e-37	1.93635e-32
NFYB	ENCFF360BTO	ENCFF478MPX	AFF1	SAFB	8952	543	329	25	19.9561	0.0440983	1
NFYB	ENCFF360BTO	ENCFF624NUZ	AFF1	SAFB2	8952	543	2	1	0.121314	0.107454	1
NFYB	ENCFF360BTO	ENCFF718NUA	AFF1	SAP30	8952	543	676	108	41.004	1.80027e-18	1.94863e-13
NFYB	ENCFF360BTO	ENCFF294EHN	AFF1	SETDB1	8952	543	286	54	17.3479	1.05166e-12	1.13833e-07
NFYB	ENCFF360BTO	ENCFF757ODD	AFF1	SFPQ	8952	543	10	1	0.606568	0.330712	1
NFYB	ENCFF360BTO	ENCFF191MPD	AFF1	SIN3A	8952	543	1094	185	66.3586	4.1365e-33	4.47739e-28
NFYB	ENCFF360BTO	ENCFF280GTU	AFF1	SIN3B	8952	543	744	143	45.1287	2.5214e-31	2.72919e-26
NFYB	ENCFF360BTO	ENCFF002CXZ	AFF1	SIRT6	8952	543	107	55	6.49028	5.65093e-32	6.11663e-27
NFYB	ENCFF360BTO	ENCFF033EBX_ENCFF002CMM	AFF1	SIX5	8952	543	637	91	38.6384	3.21605e-13	3.48109e-08
NFYB	ENCFF360BTO	ENCFF481WGW	AFF1	SKIL	8952	543	1358	268	82.372	4.92855e-59	5.33471e-54
NFYB	ENCFF360BTO	ENCFF315YAF	AFF1	SMAD1	8952	543	815	190	49.4353	2.58061e-52	2.79328e-47
NFYB	ENCFF360BTO	ENCFF011KRN	AFF1	SMAD2	8952	543	14	3	0.849196	0.0436587	1
NFYB	ENCFF360BTO	ENCFF178MOP	AFF1	SMAD5	8952	543	2109	309	127.925	4.44537e-42	4.81172e-37
NFYB	ENCFF360BTO	ENCFF995NIE	AFF1	SMARCA5	8952	543	88	26	5.3378	9.71911e-11	1.05201e-05
NFYB	ENCFF360BTO	ENCFF944GJH	AFF1	SMARCB1	8952	543	77	26	4.67058	5.88312e-12	6.36795e-07
NFYB	ENCFF360BTO	ENCFF114PTZ	AFF1	SMARCC2	8952	543	259	121	15.7101	1.0156e-63	1.0993e-58
NFYB	ENCFF360BTO	ENCFF622RBW	AFF1	SMARCE1	8952	543	489	188	29.6612	2.87801e-84	3.11519e-79
NFYB	ENCFF360BTO	ENCFF041YQC	AFF1	SMC3	8952	543	438	72	26.5677	1.69153e-13	1.83093e-08
NFYB	ENCFF360BTO	ENCFF494ZUY	AFF1	SNIP1	8952	543	103	31	6.24765	1.09366e-12	1.18379e-07
NFYB	ENCFF360BTO	ENCFF033KXY	AFF1	SNRNP70	8952	543	3	1	0.181971	0.151695	1
NFYB	ENCFF360BTO	ENCFF241TBP	AFF1	SOX6	8952	543	1337	334	81.0982	7.09901e-98	7.68403e-93
NFYB	ENCFF360BTO	ENCFF300XUA	AFF1	SP1	8952	543	2565	262	155.585	2.03053e-15	2.19787e-10
NFYB	ENCFF360BTO	ENCFF002CMJ	AFF1	SPI1	8952	543	872	129	52.8928	4.47024e-19	4.83863e-14
NFYB	ENCFF360BTO	ENCFF985TSH	AFF1	SREBF1	8952	543	462	80	28.0235	5.9783e-16	6.47097e-11
NFYB	ENCFF360BTO	ENCFF798URE	AFF1	SRSF1	8952	543	94	11	5.70174	0.0173258	1
NFYB	ENCFF360BTO	ENCFF722XRW	AFF1	SRSF3	8952	543	23	3	1.39511	0.112146	1
NFYB	ENCFF360BTO	ENCFF059WVE	AFF1	SRSF7	8952	543	3	0	0.181971	0.833626	1
NFYB	ENCFF360BTO	ENCFF137IBM	AFF1	SRSF9	8952	543	0	0	0	1	1
NFYB	ENCFF360BTO	ENCFF290HTJ	AFF1	STAT1_0	8952	543	77	22	4.67058	4.43587e-09	0.000480143
NFYB	ENCFF360BTO	ENCFF254MPF	AFF1	STAT1_1	8952	543	79	24	4.79189	2.87321e-10	3.10999e-05
NFYB	ENCFF360BTO	ENCFF498DOQ	AFF1	STAT1_2	8952	543	44	11	2.6689	8.49987e-05	1
NFYB	ENCFF360BTO	ENCFF648NYF	AFF1	STAT1_3	8952	543	195	62	11.8281	7.68994e-25	8.32367e-20
NFYB	ENCFF360BTO	ENCFF841YFF	AFF1	STAT2_0	8952	543	112	33	6.79357	3.71649e-13	4.02277e-08
NFYB	ENCFF360BTO	ENCFF714VIT	AFF1	STAT2_1	8952	543	248	86	15.0429	2.15355e-36	2.33103e-31
NFYB	ENCFF360BTO	ENCFF696KPD	AFF1	STAT5A	8952	543	409	150	24.8086	4.56361e-65	4.93969e-60
NFYB	ENCFF360BTO	ENCFF484HCG	AFF1	SUPT5H	8952	543	1504	256	91.2279	1.73581e-45	1.87886e-40
NFYB	ENCFF360BTO	ENCFF822FWM	AFF1	TAF1	8952	543	2161	327	131.079	4.04972e-47	4.38345e-42
NFYB	ENCFF360BTO	ENCFF617CAZ	AFF1	TAF15	8952	543	30	7	1.81971	0.00212466	1
NFYB	ENCFF360BTO	ENCFF034CQR	AFF1	TAF7	8952	543	37	13	2.2443	6.23865e-07	0.0675278
NFYB	ENCFF360BTO	ENCFF785HXY	AFF1	TAF9B	8952	543	1088	281	65.9946	8.86187e-86	9.59218e-81
NFYB	ENCFF360BTO	ENCFF284LRP_ENCFF482CEV	AFF1	TAL1	8952	543	296	110	17.9544	9.12928e-49	9.88163e-44
NFYB	ENCFF360BTO	ENCFF626MVT	AFF1	TBL1XR1	8952	543	1010	265	61.2634	2.08436e-82	2.25613e-77
NFYB	ENCFF360BTO	ENCFF380FJL	AFF1	TBP	8952	543	2571	351	155.949	2.35326e-41	2.5472e-36
NFYB	ENCFF360BTO	ENCFF249EZR	AFF1	TCF7	8952	543	387	106	23.4742	1.0681e-35	1.15612e-30
NFYB	ENCFF360BTO	ENCFF312RFN	AFF1	TCF7L2	8952	543	222	48	13.4658	1.82445e-13	1.9748e-08
NFYB	ENCFF360BTO	ENCFF619BDC	AFF1	TEAD2	8952	543	142	31	8.61327	2.1602e-09	0.000233822
NFYB	ENCFF360BTO	ENCFF209MQX	AFF1	TEAD4	8952	543	1125	274	68.2389	2.10856e-78	2.28232e-73
NFYB	ENCFF360BTO	ENCFF701MXF	AFF1	TFDP1	8952	543	1406	198	85.2835	9.46501e-26	1.0245e-20
NFYB	ENCFF360BTO	ENCFF641LJY	AFF1	THAP1	8952	543	728	111	44.1582	1.48711e-17	1.60966e-12
NFYB	ENCFF360BTO	ENCFF671BFH	AFF1	THRA	8952	543	30	5	1.81971	0.0269486	1
NFYB	ENCFF360BTO	ENCFF294VWT	AFF1	THRAP3	8952	543	24	8	1.45576	0.000116675	1
NFYB	ENCFF360BTO	ENCFF262BVP	AFF1	TOE1	8952	543	1364	268	82.7359	1.11628e-58	1.20828e-53
NFYB	ENCFF360BTO	ENCFF049CRW_ENCFF646VQW	AFF1	TRIM24	8952	543	277	119	16.8019	5.95086e-59	6.44127e-54
NFYB	ENCFF360BTO	ENCFF561IZB	AFF1	TRIP13	8952	543	251	23	15.2249	0.0149335	1
NFYB	ENCFF360BTO	ENCFF036YVI	AFF1	TSC22D4	8952	543	8	1	0.485255	0.298694	1
NFYB	ENCFF360BTO	ENCFF730URE	AFF1	U2AF1	8952	543	234	17	14.1937	0.0741842	1
NFYB	ENCFF360BTO	ENCFF398EQF	AFF1	U2AF2	8952	543	0	0	0	1	1
NFYB	ENCFF360BTO	ENCFF671DOL	AFF1	UBTF	8952	543	903	139	54.7731	7.76669e-22	8.40675e-17
NFYB	ENCFF360BTO	ENCFF334FMW	AFF1	USF1	8952	543	2749	216	166.746	3.517e-05	1
NFYB	ENCFF360BTO	ENCFF150VTD	AFF1	USF2	8952	543	1020	97	61.87	8.32957e-06	0.901601
NFYB	ENCFF360BTO	ENCFF186QUP	AFF1	VEZF1	8952	543	2580	324	156.495	4.93654e-32	5.34336e-27
NFYB	ENCFF360BTO	ENCFF803LEC	AFF1	XRCC3	8952	543	7	2	0.424598	0.0589556	1
NFYB	ENCFF360BTO	ENCFF998KKJ	AFF1	XRCC5	8952	543	805	163	48.8288	5.57296e-38	6.03223e-33
NFYB	ENCFF360BTO	ENCFF706LIT	AFF1	YBX1	8952	543	3	1	0.181971	0.151695	1
NFYB	ENCFF360BTO	ENCFF246HIU	AFF1	YBX3	8952	543	165	48	10.0084	3.77542e-18	4.08655e-13
NFYB	ENCFF360BTO	ENCFF926FUM_ENCFF328XKC	AFF1	YY1	8952	543	1295	199	78.5506	2.65952e-30	2.87869e-25
NFYB	ENCFF360BTO	ENCFF253FON	AFF1	ZBED1	8952	543	411	117	24.93	9.78807e-41	1.05947e-35
NFYB	ENCFF360BTO	ENCFF434QZL	AFF1	ZBTB11	8952	543	532	94	32.2694	5.96453e-19	6.45607e-14
NFYB	ENCFF360BTO	ENCFF561USY	AFF1	ZBTB2	8952	543	733	170	44.4615	9.707e-47	1.0507e-41
NFYB	ENCFF360BTO	ENCFF408FQC	AFF1	ZBTB33	8952	543	476	46	28.8727	0.000799069	1
NFYB	ENCFF360BTO	ENCFF417LEJ	AFF1	ZBTB40	8952	543	1286	208	78.0047	2.00395e-34	2.16909e-29
NFYB	ENCFF360BTO	ENCFF706ISJ	AFF1	ZBTB7A	8952	543	1354	172	82.1294	1.9774e-18	2.14036e-13
NFYB	ENCFF360BTO	ENCFF589EVD	AFF1	ZBTB8A	8952	543	14	8	0.849196	2.86907e-06	0.310551
NFYB	ENCFF360BTO	ENCFF522JRK	AFF1	ZC3H11A	8952	543	160	51	9.70509	8.5403e-21	9.2441e-16
NFYB	ENCFF360BTO	ENCFF809OEX	AFF1	ZC3H8	8952	543	273	128	16.5593	1.81823e-67	1.96807e-62
NFYB	ENCFF360BTO	ENCFF521CRG	AFF1	ZFP36	8952	543	420	83	25.4759	1.11835e-19	1.21051e-14
NFYB	ENCFF360BTO	ENCFF396DNK	AFF1	ZFP91	8952	543	377	70	22.8676	1.36706e-15	1.47972e-10
NFYB	ENCFF360BTO	ENCFF433RKB	AFF1	ZFX	8952	543	920	134	55.8043	3.29964e-19	3.57156e-14
NFYB	ENCFF360BTO	ENCFF195ODE	AFF1	ZHX1	8952	543	290	80	17.5905	1.3429e-27	1.45357e-22
NFYB	ENCFF360BTO	ENCFF163VUK	AFF1	ZKSCAN1	8952	543	665	164	40.3368	1.99597e-48	2.16045e-43
NFYB	ENCFF360BTO	ENCFF529FWJ	AFF1	ZKSCAN8	8952	543	176	60	10.6756	1.40286e-25	1.51847e-20
NFYB	ENCFF360BTO	ENCFF597DIY	AFF1	ZMIZ1	8952	543	73	18	4.42795	7.98495e-07	0.0864299
NFYB	ENCFF360BTO	ENCFF511QHY	AFF1	ZMYM3	8952	543	80	22	4.85255	8.57301e-09	0.000927951
NFYB	ENCFF360BTO	ENCFF114IWY	AFF1	ZNF143	8952	543	1419	205	86.0721	6.78904e-28	7.34852e-23
NFYB	ENCFF360BTO	ENCFF116DIO	AFF1	ZNF148	8952	543	844	129	51.1944	3.62645e-20	3.92531e-15
NFYB	ENCFF360BTO	ENCFF721LDD	AFF1	ZNF175	8952	543	526	127	31.9055	4.52468e-37	4.89756e-32
NFYB	ENCFF360BTO	ENCFF853TZC	AFF1	ZNF197	8952	543	375	95	22.7463	1.0324e-29	1.11748e-24
NFYB	ENCFF360BTO	ENCFF891MVM	AFF1	ZNF263	8952	543	94	13	5.70174	0.00361063	1
NFYB	ENCFF360BTO	ENCFF344QKL	AFF1	ZNF274	8952	543	56	29	3.39678	9.53285e-18	1.03185e-12
NFYB	ENCFF360BTO	ENCFF386WKY	AFF1	ZNF280A	8952	543	31	3	1.88036	0.169022	1
NFYB	ENCFF360BTO	ENCFF581ZZT	AFF1	ZNF282	8952	543	554	148	33.6039	8.01771e-48	8.67845e-43
NFYB	ENCFF360BTO	ENCFF921WMN	AFF1	ZNF318	8952	543	328	147	19.8954	1.09382e-74	1.18396e-69
NFYB	ENCFF360BTO	ENCFF744SVC	AFF1	ZNF354B	8952	543	134	29	8.12802	8.18579e-09	0.000886038
NFYB	ENCFF360BTO	ENCFF706SJZ	AFF1	ZNF384	8952	543	618	127	37.4859	1.32552e-30	1.43475e-25
NFYB	ENCFF360BTO	ENCFF388YOB	AFF1	ZNF395	8952	543	1005	212	60.9601	1.90488e-51	2.06187e-46
NFYB	ENCFF360BTO	ENCFF834WGJ	AFF1	ZNF507	8952	543	2	0	0.121314	0.885756	1
NFYB	ENCFF360BTO	ENCFF447QUG	AFF1	ZNF512	8952	543	27	4	1.63773	0.0582779	1
NFYB	ENCFF360BTO	ENCFF815TTY	AFF1	ZNF584	8952	543	348	102	21.1086	8.80143e-37	9.52676e-32
NFYB	ENCFF360BTO	ENCFF602AXP	AFF1	ZNF589	8952	543	618	160	37.4859	7.3372e-50	7.94186e-45
NFYB	ENCFF360BTO	ENCFF273TYA	AFF1	ZNF592	8952	543	654	140	39.6696	2.67094e-35	2.89106e-30
NFYB	ENCFF360BTO	ENCFF173NRW	AFF1	ZNF644	8952	543	389	120	23.5955	4.64226e-45	5.02483e-40
NFYB	ENCFF360BTO	ENCFF248AOD	AFF1	ZNF766	8952	543	817	178	49.5566	2.57694e-45	2.7893e-40
NFYB	ENCFF360BTO	ENCFF654BMD	AFF1	ZNF83	8952	543	418	108	25.3546	3.19602e-34	3.4594e-29
NFYB	ENCFF360BTO	ENCFF996IVU	AFF1	ZNF830	8952	543	80	23	4.85255	1.80874e-09	0.000195779
NFYB	ENCFF360BTO	ENCFF253NXR	AFF1	ZSCAN29	8952	543	356	131	21.5938	3.09849e-57	3.35384e-52
NFYB	ENCFF360BTO	ENCFF588OLK	AFF1	ZZZ3	8952	543	153	46	9.2805	5.46055e-18	5.91056e-13
NFYB	ENCFF010MMQ	ENCFF836VRV	ARHGAP35	37104	8952	85	401	11	3.80753	0.00135622	1
NFYB	ENCFF010MMQ	ENCFF396GUH	ARHGAP35	ADNP	8952	85	127	3	1.20588	0.0875087	1
NFYB	ENCFF010MMQ	ENCFF360BTO	ARHGAP35	AFF1	8952	85	543	20	5.15583	4.17542e-07	0.0451951
NFYB	ENCFF010MMQ	ENCFF010MMQ	ARHGAP35	ARHGAP35	8952	85	85	85	0.807082	1.93953e-137	2.09937e-132
NFYB	ENCFF010MMQ	ENCFF225MPC	ARHGAP35	ARID1B	8952	85	675	11	6.40918	0.0309172	1
NFYB	ENCFF010MMQ	ENCFF332ICQ	ARHGAP35	ARID2	8952	85	79	2	0.750112	0.132878	1
NFYB	ENCFF010MMQ	ENCFF835KAT	ARHGAP35	ARID3A	8952	85	570	9	5.4122	0.0489906	1
NFYB	ENCFF010MMQ	ENCFF235ZZP	ARHGAP35	ASH1L	8952	85	2325	43	22.0761	2.63011e-05	1
NFYB	ENCFF010MMQ	ENCFF002CVM	ARHGAP35	ATF1	8952	85	1593	37	15.1257	8.74398e-07	0.0946457
NFYB	ENCFF010MMQ	ENCFF968KBN	ARHGAP35	ATF2	8952	85	826	17	7.84294	0.00177389	1
NFYB	ENCFF010MMQ	ENCFF958KNK	ARHGAP35	ATF3	8952	85	1033	19	9.80842	0.00313001	1
NFYB	ENCFF010MMQ	ENCFF710IEF	ARHGAP35	ATF4	8952	85	426	13	4.04491	0.000218197	1
NFYB	ENCFF010MMQ	ENCFF868QLL	ARHGAP35	ATF7	8952	85	2939	59	27.9061	1.08328e-07	0.0117255
NFYB	ENCFF010MMQ	ENCFF423EMU	ARHGAP35	BACH1	8952	85	116	1	1.10143	0.36611	1
NFYB	ENCFF010MMQ	ENCFF057ZUY	ARHGAP35	BCOR	8952	85	382	10	3.62712	0.00288815	1
NFYB	ENCFF010MMQ	ENCFF002CVP	ARHGAP35	BDP1	8952	85	13	0	0.123436	0.883878	1
NFYB	ENCFF010MMQ	ENCFF179NDS	ARHGAP35	BHLHE40	8952	85	1665	36	15.8093	5.30197e-06	0.57389
NFYB	ENCFF010MMQ	ENCFF048OIZ	ARHGAP35	BMI1	8952	85	278	4	2.63963	0.144406	1
NFYB	ENCFF010MMQ	ENCFF549GMO	ARHGAP35	BRCA1	8952	85	1	0	0.00949509	0.99055	1
NFYB	ENCFF010MMQ	ENCFF714XHL	ARHGAP35	BRD4	8952	85	160	8	1.51921	0.000154044	1
NFYB	ENCFF010MMQ	ENCFF666LZV	ARHGAP35	BRD9	8952	85	305	13	2.896	8.94099e-06	0.967781
NFYB	ENCFF010MMQ	ENCFF002CVR	ARHGAP35	BRF1	8952	85	10	0	0.0949508	0.909418	1
NFYB	ENCFF010MMQ	ENCFF002CVS	ARHGAP35	BRF2	8952	85	7	0	0.0664656	0.935695	1
NFYB	ENCFF010MMQ	ENCFF996ZGL	ARHGAP35	C11orf30	8952	85	1723	49	16.36	3.85697e-11	4.17482e-06
NFYB	ENCFF010MMQ	ENCFF642BNC	ARHGAP35	CBFA2T2	8952	85	1271	11	12.0683	0.113699	1
NFYB	ENCFF010MMQ	ENCFF993GXU	ARHGAP35	CBFA2T3	8952	85	635	9	6.02938	0.0698496	1
NFYB	ENCFF010MMQ	ENCFF484DKT	ARHGAP35	CBX1	8952	85	963	35	9.14377	4.50879e-11	4.88036e-06
NFYB	ENCFF010MMQ	ENCFF455TDM	ARHGAP35	CBX3	8952	85	1458	35	13.8438	8.26875e-07	0.0895018
NFYB	ENCFF010MMQ	ENCFF062ARS	ARHGAP35	CBX5	8952	85	211	4	2.00346	0.090536	1
NFYB	ENCFF010MMQ	ENCFF456PQY	ARHGAP35	CBX8	8952	85	3	0	0.0284853	0.971917	1
NFYB	ENCFF010MMQ	ENCFF874QUM	ARHGAP35	CC2D1A	8952	85	1405	39	13.3406	6.00482e-09	0.000649968
NFYB	ENCFF010MMQ	ENCFF583GKE	ARHGAP35	CCAR2	8952	85	26	1	0.246872	0.192867	1
NFYB	ENCFF010MMQ	ENCFF002CVU	ARHGAP35	CCNT2	8952	85	1787	33	16.9677	0.000186166	1
NFYB	ENCFF010MMQ	ENCFF643TEZ	ARHGAP35	CDC5L	8952	85	74	7	0.702636	8.30869e-06	0.899341
NFYB	ENCFF010MMQ	ENCFF813LOW_ENCFF429XKT	ARHGAP35	CEBPB	8952	85	594	11	5.64008	0.0163503	1
NFYB	ENCFF010MMQ	ENCFF925MHB	ARHGAP35	CEBPZ	8952	85	593	9	5.63059	0.0562195	1
NFYB	ENCFF010MMQ	ENCFF859FVX	ARHGAP35	CHAMP1	8952	85	684	16	6.49464	0.000723893	1
NFYB	ENCFF010MMQ	ENCFF684MLP	ARHGAP35	COPS2	8952	85	11	0	0.104446	0.900824	1
NFYB	ENCFF010MMQ	ENCFF665FHC	ARHGAP35	CREB3	8952	85	330	6	3.13338	0.0572711	1
NFYB	ENCFF010MMQ	ENCFF582YPB	ARHGAP35	CREB3L1	8952	85	1553	65	14.7459	4.39735e-22	4.75974e-17
NFYB	ENCFF010MMQ	ENCFF948TXN	ARHGAP35	CREM	8952	85	3223	63	30.6027	1.0352e-07	0.0112051
NFYB	ENCFF010MMQ	ENCFF117EWO	ARHGAP35	CSDE1	8952	85	467	13	4.4342	0.000488173	1
NFYB	ENCFF010MMQ	ENCFF152VMJ	ARHGAP35	CTBP1	8952	85	2152	45	20.4334	1.03137e-06	0.111637
NFYB	ENCFF010MMQ	ENCFF002DDJ_ENCFF002DBD	ARHGAP35	CTCF	8952	85	445	5	4.22531	0.16409	1
NFYB	ENCFF010MMQ	ENCFF962FQM	ARHGAP35	CTCFL	8952	85	434	11	4.12087	0.00236619	1
NFYB	ENCFF010MMQ	ENCFF517YCC	ARHGAP35	CUX1	8952	85	205	3	1.94649	0.175491	1
NFYB	ENCFF010MMQ	ENCFF526HLP	ARHGAP35	DACH1	8952	85	492	9	4.67158	0.0273256	1
NFYB	ENCFF010MMQ	ENCFF338HQY	ARHGAP35	DDX20	8952	85	2080	41	19.7498	1.03849e-05	1
NFYB	ENCFF010MMQ	ENCFF786WZD	ARHGAP35	DEAF1	8952	85	775	20	7.35869	5.67607e-05	1
NFYB	ENCFF010MMQ	ENCFF408SNO	ARHGAP35	DIDO1	8952	85	566	27	5.37422	2.22606e-11	2.40951e-06
NFYB	ENCFF010MMQ	ENCFF034PQD	ARHGAP35	DNMT1	8952	85	43	8	0.408289	1.27321e-08	0.00137814
NFYB	ENCFF010MMQ	ENCFF774QKS_ENCFF823SYE	ARHGAP35	DPF2	8952	85	347	9	3.29479	0.00467499	1
NFYB	ENCFF010MMQ	ENCFF106DAY	ARHGAP35	E2F1	8952	85	2426	52	23.0351	8.58236e-08	0.00928964
NFYB	ENCFF010MMQ	ENCFF225TLP	ARHGAP35	E2F4	8952	85	1863	52	17.6893	1.95874e-11	2.12016e-06
NFYB	ENCFF010MMQ	ENCFF356ASJ	ARHGAP35	E2F5	8952	85	1026	32	9.74196	9.67451e-09	0.00104718
NFYB	ENCFF010MMQ	ENCFF417DTI_ENCFF917COW	ARHGAP35	E2F6	8952	85	1561	37	14.8218	5.5923e-07	0.0605316
NFYB	ENCFF010MMQ	ENCFF310AGG	ARHGAP35	E2F7	8952	85	371	8	3.52268	0.0173613	1
NFYB	ENCFF010MMQ	ENCFF925DJG	ARHGAP35	E2F8	8952	85	1153	44	10.9478	3.55841e-14	3.85166e-09
NFYB	ENCFF010MMQ	ENCFF083YCQ	ARHGAP35	E4F1	8952	85	2631	57	24.9816	1.61147e-08	0.00174427
NFYB	ENCFF010MMQ	ENCFF806BDC	ARHGAP35	EHMT2	8952	85	463	11	4.39622	0.00365988	1
NFYB	ENCFF010MMQ	ENCFF502KHR	ARHGAP35	ELF4	8952	85	1900	48	18.0407	2.35098e-09	0.000254473
NFYB	ENCFF010MMQ	ENCFF019PEL	ARHGAP35	ELK1	8952	85	476	14	4.51966	0.000185443	1
NFYB	ENCFF010MMQ	ENCFF549TYR	ARHGAP35	EP300	8952	85	1149	28	10.9099	6.86593e-06	0.743175
NFYB	ENCFF010MMQ	ENCFF925ANU	ARHGAP35	EP400	8952	85	1839	50	17.4615	1.09028e-10	1.18013e-05
NFYB	ENCFF010MMQ	ENCFF213EPU	ARHGAP35	ESRRA	8952	85	1586	42	15.0592	6.0239e-09	0.000652033
NFYB	ENCFF010MMQ	ENCFF076YZO	ARHGAP35	ETS1	8952	85	976	34	9.2672	2.40655e-10	2.60488e-05
NFYB	ENCFF010MMQ	ENCFF772HOY	ARHGAP35	ETS2	8952	85	22	2	0.208892	0.0177049	1
NFYB	ENCFF010MMQ	ENCFF404YMX	ARHGAP35	ETV1	8952	85	948	32	9.00134	1.61594e-09	0.000174911
NFYB	ENCFF010MMQ	ENCFF545VNY	ARHGAP35	ETV6	8952	85	250	13	2.37377	1.13634e-06	0.122999
NFYB	ENCFF010MMQ	ENCFF820EVZ	ARHGAP35	EWSR1	8952	85	10	0	0.0949508	0.909418	1
NFYB	ENCFF010MMQ	ENCFF883WYX	ARHGAP35	FIP1L1	8952	85	674	20	6.39969	9.07197e-06	0.981959
NFYB	ENCFF010MMQ	ENCFF002CVW	ARHGAP35	FOS	8952	85	3625	42	34.4197	0.0281794	1
NFYB	ENCFF010MMQ	ENCFF473GCH	ARHGAP35	FOSL1	8952	85	202	5	1.91801	0.0317753	1
NFYB	ENCFF010MMQ	ENCFF809YFY	ARHGAP35	FOXA1	8952	85	17	1	0.161416	0.137355	1
NFYB	ENCFF010MMQ	ENCFF452SPE	ARHGAP35	FOXJ2	8952	85	719	18	6.82697	0.000175729	1
NFYB	ENCFF010MMQ	ENCFF699ZII	ARHGAP35	FOXM1	8952	85	1366	38	12.9703	8.72246e-09	0.000944128
NFYB	ENCFF010MMQ	ENCFF142CPK	ARHGAP35	FUS	8952	85	197	6	1.87053	0.00916424	1
NFYB	ENCFF010MMQ	ENCFF833FCO	ARHGAP35	GABPA	8952	85	1778	49	16.8823	1.0669e-10	1.15482e-05
NFYB	ENCFF010MMQ	ENCFF517KRT	ARHGAP35	GABPB1	8952	85	2338	56	22.1995	7.98427e-10	8.64226e-05
NFYB	ENCFF010MMQ	ENCFF632NQI	ARHGAP35	GATA1	8952	85	472	16	4.48168	1.4324e-05	1
NFYB	ENCFF010MMQ	ENCFF732HOE	ARHGAP35	GATA2	8952	85	327	4	3.10489	0.173595	1
NFYB	ENCFF010MMQ	ENCFF253FZN	ARHGAP35	GATAD2A	8952	85	324	7	3.07641	0.0238677	1
NFYB	ENCFF010MMQ	ENCFF549KOD	ARHGAP35	GATAD2B	8952	85	474	18	4.50067	9.95479e-07	0.107752
NFYB	ENCFF010MMQ	ENCFF126BCK	ARHGAP35	GMEB1	8952	85	1653	54	15.6954	2.46569e-14	2.66889e-09
NFYB	ENCFF010MMQ	ENCFF167HYX	ARHGAP35	GTF2A2	8952	85	175	7	1.66164	0.00131731	1
NFYB	ENCFF010MMQ	ENCFF002CWR	ARHGAP35	GTF2B	8952	85	606	21	5.75402	5.6509e-07	0.0611659
NFYB	ENCFF010MMQ	ENCFF778RMG	ARHGAP35	GTF2E2	8952	85	780	21	7.40617	2.17101e-05	1
NFYB	ENCFF010MMQ	ENCFF002CYL	ARHGAP35	GTF3C2	8952	85	36	0	0.341823	0.710474	1
NFYB	ENCFF010MMQ	ENCFF474NLG	ARHGAP35	HCFC1	8952	85	1895	51	17.9932	1.0128e-10	1.09627e-05
NFYB	ENCFF010MMQ	ENCFF580DYE	ARHGAP35	HDAC3	8952	85	261	21	2.47822	3.10675e-13	3.36278e-08
NFYB	ENCFF010MMQ	ENCFF998HOR	ARHGAP35	HDAC6	8952	85	85	2	0.807082	0.14531	1
NFYB	ENCFF010MMQ	ENCFF939ZFS	ARHGAP35	HDAC8	8952	85	232	7	2.20286	0.00551807	1
NFYB	ENCFF010MMQ	ENCFF676NPW	ARHGAP35	HES1	8952	85	504	9	4.78552	0.0302883	1
NFYB	ENCFF010MMQ	ENCFF265LKN	ARHGAP35	HINFP	8952	85	226	4	2.14589	0.10334	1
NFYB	ENCFF010MMQ	ENCFF396NSO	ARHGAP35	HLTF	8952	85	195	11	1.85154	3.44824e-06	0.373241
NFYB	ENCFF010MMQ	ENCFF558DSF	ARHGAP35	HMBOX1	8952	85	512	34	4.86148	5.87029e-18	6.35406e-13
NFYB	ENCFF010MMQ	ENCFF002CWT	ARHGAP35	HMGN3	8952	85	1513	29	14.3661	0.000238317	1
NFYB	ENCFF010MMQ	ENCFF292JRY	ARHGAP35	HNRNPH1	8952	85	15	4	0.142426	1.48694e-05	1
NFYB	ENCFF010MMQ	ENCFF777CWV	ARHGAP35	HNRNPK	8952	85	381	9	3.61763	0.0078512	1
NFYB	ENCFF010MMQ	ENCFF010STZ	ARHGAP35	HNRNPL	8952	85	398	12	3.77904	0.000404602	1
NFYB	ENCFF010MMQ	ENCFF122QSN	ARHGAP35	HNRNPLL	8952	85	1631	42	15.4865	1.27246e-08	0.00137733
NFYB	ENCFF010MMQ	ENCFF768TJI	ARHGAP35	HNRNPUL1	8952	85	26	1	0.246872	0.192867	1
NFYB	ENCFF010MMQ	ENCFF835YLR	ARHGAP35	ID3	8952	85	578	18	5.48816	1.31784e-05	1
NFYB	ENCFF010MMQ	ENCFF415YPX	ARHGAP35	ILF3	8952	85	112	3	1.06345	0.0692069	1
NFYB	ENCFF010MMQ	ENCFF176NOI	ARHGAP35	ILK	8952	85	11	0	0.104446	0.900824	1
NFYB	ENCFF010MMQ	ENCFF388AJH	ARHGAP35	IRF1	8952	85	182	0	1.72811	0.177621	1
NFYB	ENCFF010MMQ	ENCFF284VUQ	ARHGAP35	IRF1_0	8952	85	3230	69	30.6691	1.07067e-09	0.000115891
NFYB	ENCFF010MMQ	ENCFF909LKK	ARHGAP35	IRF1_1	8952	85	1104	41	10.4826	5.78405e-13	6.26071e-08
NFYB	ENCFF010MMQ	ENCFF908UIY	ARHGAP35	IRF1_2	8952	85	1228	42	11.66	3.88818e-12	4.20861e-07
NFYB	ENCFF010MMQ	ENCFF730RUF	ARHGAP35	IRF1_3	8952	85	70	2	0.664656	0.113634	1
NFYB	ENCFF010MMQ	ENCFF384YDT	ARHGAP35	IRF2	8952	85	787	21	7.47263	2.45063e-05	1
NFYB	ENCFF010MMQ	ENCFF196DHR	ARHGAP35	IRF9	8952	85	162	4	1.5382	0.0500969	1
NFYB	ENCFF010MMQ	ENCFF629BFI	ARHGAP35	JUN	8952	85	1372	32	13.0273	3.95783e-06	0.4284
NFYB	ENCFF010MMQ	ENCFF417QAJ	ARHGAP35	JUN_0	8952	85	290	6	2.75357	0.0385644	1
NFYB	ENCFF010MMQ	ENCFF573GQX	ARHGAP35	JUN_1	8952	85	193	2	1.83255	0.268668	1
NFYB	ENCFF010MMQ	ENCFF192BTP	ARHGAP35	JUN_2	8952	85	185	3	1.75659	0.155949	1
NFYB	ENCFF010MMQ	ENCFF077UYM	ARHGAP35	JUN_3	8952	85	495	13	4.70007	0.000797736	1
NFYB	ENCFF010MMQ	ENCFF426DUB	ARHGAP35	JUNB	8952	85	204	9	1.937	0.000152465	1
NFYB	ENCFF010MMQ	ENCFF337DKJ	ARHGAP35	JUND	8952	85	2322	50	22.0476	1.28775e-07	0.0139388
NFYB	ENCFF010MMQ	ENCFF772QPO	ARHGAP35	KAT8	8952	85	66	2	0.626676	0.104929	1
NFYB	ENCFF010MMQ	ENCFF838COI_ENCFF738WCE	ARHGAP35	KDM1A	8952	85	357	8	3.38975	0.014577	1
NFYB	ENCFF010MMQ	ENCFF042RAK	ARHGAP35	KDM4B	8952	85	695	25	6.59908	2.69464e-08	0.0029167
NFYB	ENCFF010MMQ	ENCFF368TYM	ARHGAP35	KDM5B	8952	85	1661	51	15.7713	1.12524e-12	1.21797e-07
NFYB	ENCFF010MMQ	ENCFF962VSZ	ARHGAP35	KHSRP	8952	85	308	10	2.92449	0.000677087	1
NFYB	ENCFF010MMQ	ENCFF717TWA	ARHGAP35	KLF1	8952	85	712	17	6.7605	0.000419299	1
NFYB	ENCFF010MMQ	ENCFF802XZN	ARHGAP35	KLF13	8952	85	655	15	6.21928	0.00122632	1
NFYB	ENCFF010MMQ	ENCFF844HBQ	ARHGAP35	KLF16	8952	85	524	10	4.97542	0.0176905	1
NFYB	ENCFF010MMQ	ENCFF314ULQ	ARHGAP35	L3MBTL2	8952	85	2628	49	24.9531	6.88645e-06	0.745396
NFYB	ENCFF010MMQ	ENCFF511OXK	ARHGAP35	LARP7	8952	85	85	6	0.807082	0.000171263	1
NFYB	ENCFF010MMQ	ENCFF659WAF	ARHGAP35	LEF1	8952	85	684	22	6.49464	1.01125e-06	0.109458
NFYB	ENCFF010MMQ	ENCFF308IXJ	ARHGAP35	MAFF	8952	85	384	38	3.64611	1.11567e-25	1.20761e-20
NFYB	ENCFF010MMQ	ENCFF927JBT	ARHGAP35	MAFG	8952	85	569	3	5.4027	0.118391	1
NFYB	ENCFF010MMQ	ENCFF812QPN	ARHGAP35	MAFK	8952	85	603	12	5.72554	0.00845061	1
NFYB	ENCFF010MMQ	ENCFF799HIG_ENCFF422NGZ	ARHGAP35	MAX	8952	85	2485	49	23.5953	1.72596e-06	0.186819
NFYB	ENCFF010MMQ	ENCFF470MLY	ARHGAP35	MBD2	8952	85	2937	61	27.8871	2.25355e-08	0.00243927
NFYB	ENCFF010MMQ	ENCFF226CZE	ARHGAP35	MCM2	8952	85	10	3	0.0949508	0.00012975	1
NFYB	ENCFF010MMQ	ENCFF679ITJ	ARHGAP35	MCM3	8952	85	7	1	0.0664656	0.0621915	1
NFYB	ENCFF010MMQ	ENCFF920RYJ	ARHGAP35	MCM5	8952	85	1	0	0.00949509	0.99055	1
NFYB	ENCFF010MMQ	ENCFF577UJR	ARHGAP35	MEF2A	8952	85	40	0	0.379803	0.683996	1
NFYB	ENCFF010MMQ	ENCFF257RYT	ARHGAP35	MEF2D	8952	85	295	9	2.80105	0.00177682	1
NFYB	ENCFF010MMQ	ENCFF613RNG	ARHGAP35	MEIS2	8952	85	2014	45	19.1231	1.93756e-07	0.0209723
NFYB	ENCFF010MMQ	ENCFF670ZCR	ARHGAP35	MGA	8952	85	1391	28	13.2077	0.000145536	1
NFYB	ENCFF010MMQ	ENCFF365NKO	ARHGAP35	MIER1	8952	85	112	6	1.06345	0.000693615	1
NFYB	ENCFF010MMQ	ENCFF497XOD	ARHGAP35	MITF	8952	85	1452	20	13.7869	0.0260391	1
NFYB	ENCFF010MMQ	ENCFF973OME_ENCFF059ONJ	ARHGAP35	MNT	8952	85	1653	37	15.6954	1.94268e-06	0.210278
NFYB	ENCFF010MMQ	ENCFF769GYG	ARHGAP35	MTA1	8952	85	635	28	6.02938	5.5586e-11	6.01668e-06
NFYB	ENCFF010MMQ	ENCFF350YXB	ARHGAP35	MTA3	8952	85	2033	43	19.3035	1.31161e-06	0.14197
NFYB	ENCFF010MMQ	ENCFF970LCB	ARHGAP35	MXI1	8952	85	1084	36	10.2927	2.57292e-10	2.78496e-05
NFYB	ENCFF010MMQ	ENCFF877ANE	ARHGAP35	MYBL2	8952	85	512	18	4.86148	2.78088e-06	0.301005
NFYB	ENCFF010MMQ	ENCFF465JKF	ARHGAP35	MYC	8952	85	2224	55	21.1171	3.80314e-10	4.11656e-05
NFYB	ENCFF010MMQ	ENCFF099SDW	ARHGAP35	MYC_0	8952	85	1616	50	15.3441	1.41285e-12	1.52928e-07
NFYB	ENCFF010MMQ	ENCFF634AYU	ARHGAP35	MYC_1	8952	85	778	30	7.38718	2.64535e-10	2.86336e-05
NFYB	ENCFF010MMQ	ENCFF676YJE	ARHGAP35	MYC_2	8952	85	2518	64	23.9086	5.50418e-12	5.95778e-07
NFYB	ENCFF010MMQ	ENCFF387LTN	ARHGAP35	MYC_3	8952	85	1137	37	10.7959	2.53077e-10	2.73933e-05
NFYB	ENCFF010MMQ	ENCFF583DZD	ARHGAP35	MYNN	8952	85	659	22	6.25726	5.65189e-07	0.0611766
NFYB	ENCFF010MMQ	ENCFF074EZL	ARHGAP35	NBN	8952	85	791	26	7.51061	7.94552e-08	0.00860031
NFYB	ENCFF010MMQ	ENCFF495CSO	ARHGAP35	NCOA4	8952	85	30	3	0.284853	0.00289734	1
NFYB	ENCFF010MMQ	ENCFF322DSX	ARHGAP35	NCOA6	8952	85	148	3	1.40527	0.113456	1
NFYB	ENCFF010MMQ	ENCFF165BCW_ENCFF366UBB	ARHGAP35	NCOR1	8952	85	450	13	4.27279	0.000354258	1
NFYB	ENCFF010MMQ	ENCFF002CXG	ARHGAP35	NELFE	8952	85	74	4	0.702636	0.00502991	1
NFYB	ENCFF010MMQ	ENCFF581YKY	ARHGAP35	NEUROD1	8952	85	2218	68	21.0601	2.84816e-16	3.08288e-11
NFYB	ENCFF010MMQ	ENCFF495MHZ	ARHGAP35	NFE2	8952	85	669	15	6.35221	0.0014745	1
NFYB	ENCFF010MMQ	ENCFF175IUO	ARHGAP35	NFE2L1	8952	85	58	0	0.550715	0.576537	1
NFYB	ENCFF010MMQ	ENCFF370ENX	ARHGAP35	NFIC	8952	85	926	26	8.79245	1.32655e-06	0.143588
NFYB	ENCFF010MMQ	ENCFF157UUF	ARHGAP35	NFRKB	8952	85	698	29	6.62757	9.8723e-11	1.06859e-05
NFYB	ENCFF010MMQ	ENCFF986MHU	ARHGAP35	NFXL1	8952	85	52	3	0.493744	0.012244	1
NFYB	ENCFF010MMQ	ENCFF012VES	ARHGAP35	NFYA	8952	85	3615	49	34.3247	0.0035777	1
NFYB	ENCFF010MMQ	ENCFF113PMT	ARHGAP35	NFYB	8952	85	8952	85	85	0.043229	1
NFYB	ENCFF010MMQ	ENCFF906PGD	ARHGAP35	NKRF	8952	85	538	19	5.10836	1.42468e-06	0.154208
NFYB	ENCFF010MMQ	ENCFF776YPS	ARHGAP35	NONO	8952	85	511	8	4.85199	0.0595176	1
NFYB	ENCFF010MMQ	ENCFF954NAJ	ARHGAP35	NR0B1	8952	85	0	0	0	1	1
NFYB	ENCFF010MMQ	ENCFF664ZGR	ARHGAP35	NR2C1	8952	85	907	25	8.61204	2.79799e-06	0.302857
NFYB	ENCFF010MMQ	ENCFF594LCH	ARHGAP35	NR2C2	8952	85	79	3	0.750112	0.0332244	1
NFYB	ENCFF010MMQ	ENCFF175IIE	ARHGAP35	NR2F1	8952	85	868	17	8.24173	0.00276635	1
NFYB	ENCFF010MMQ	ENCFF255EOB	ARHGAP35	NR2F2	8952	85	769	21	7.30172	1.7885e-05	1
NFYB	ENCFF010MMQ	ENCFF712AXK	ARHGAP35	NR2F6	8952	85	484	12	4.59562	0.00187043	1
NFYB	ENCFF010MMQ	ENCFF859NPS	ARHGAP35	NR4A1	8952	85	419	9	3.97844	0.0128777	1
NFYB	ENCFF010MMQ	ENCFF144PPR_ENCFF493ABN	ARHGAP35	NRF1	8952	85	1920	39	18.2306	8.79397e-06	0.951869
NFYB	ENCFF010MMQ	ENCFF289BUU	ARHGAP35	NUFIP1	8952	85	102	7	0.968499	6.02073e-05	1
NFYB	ENCFF010MMQ	ENCFF168HAG	ARHGAP35	PBX2	8952	85	1779	32	16.8918	0.000338396	1
NFYB	ENCFF010MMQ	ENCFF941RVL	ARHGAP35	PCBP1	8952	85	622	17	5.90594	9.90673e-05	1
NFYB	ENCFF010MMQ	ENCFF881XQF	ARHGAP35	PCBP2	8952	85	37	2	0.351318	0.0434306	1
NFYB	ENCFF010MMQ	ENCFF462FRU	ARHGAP35	PHB2	8952	85	94	4	0.892538	0.0108311	1
NFYB	ENCFF010MMQ	ENCFF948YVM	ARHGAP35	PHF20	8952	85	727	27	6.90293	4.15922e-09	0.000450199
NFYB	ENCFF010MMQ	ENCFF134CUM	ARHGAP35	PHF21A	8952	85	549	15	5.2128	0.000237508	1
NFYB	ENCFF010MMQ	ENCFF626KTJ	ARHGAP35	PHF8	8952	85	1055	24	10.0173	7.49655e-05	1
NFYB	ENCFF010MMQ	ENCFF544XKC	ARHGAP35	PKNOX1	8952	85	3439	66	32.6536	1.0053e-07	0.0108815
NFYB	ENCFF010MMQ	ENCFF881QBT	ARHGAP35	PML	8952	85	1497	44	14.2141	1.3243e-10	1.43343e-05
NFYB	ENCFF010MMQ	ENCFF662YQK	ARHGAP35	POLR2A_0	8952	85	2114	55	20.0726	6.63906e-11	7.18619e-06
NFYB	ENCFF010MMQ	ENCFF853ZMA	ARHGAP35	POLR2A_1	8952	85	2334	61	22.1615	5.64219e-12	6.10717e-07
NFYB	ENCFF010MMQ	ENCFF206YXX	ARHGAP35	POLR2A_2	8952	85	2119	55	20.1201	7.2097e-11	7.80385e-06
NFYB	ENCFF010MMQ	ENCFF270QAB	ARHGAP35	POLR2A_3	8952	85	2363	61	22.4369	9.09906e-12	9.84892e-07
NFYB	ENCFF010MMQ	ENCFF296CNQ	ARHGAP35	POLR2AphosphoS2	8952	85	671	24	6.3712	5.51607e-08	0.00597064
NFYB	ENCFF010MMQ	ENCFF542DOG	ARHGAP35	POLR2AphosphoS5	8952	85	2039	61	19.3605	2.44471e-14	2.64618e-09
NFYB	ENCFF010MMQ	ENCFF872JJJ	ARHGAP35	POLR2B	8952	85	1396	44	13.2551	1.59836e-11	1.73008e-06
NFYB	ENCFF010MMQ	ENCFF273EYJ	ARHGAP35	POLR2G	8952	85	2355	51	22.3609	8.35808e-08	0.00904687
NFYB	ENCFF010MMQ	ENCFF801YZV	ARHGAP35	POLR2H	8952	85	1563	50	14.8408	4.41094e-13	4.77445e-08
NFYB	ENCFF010MMQ	ENCFF002CXW	ARHGAP35	POLR3A	8952	85	16	0	0.151921	0.859056	1
NFYB	ENCFF010MMQ	ENCFF002CXT	ARHGAP35	POLR3G	8952	85	5	0	0.0474754	0.953634	1
NFYB	ENCFF010MMQ	ENCFF990CFV	ARHGAP35	POU5F1	8952	85	302	11	2.86752	0.000153484	1
NFYB	ENCFF010MMQ	ENCFF294HEI	ARHGAP35	PRDM10	8952	85	1321	29	12.543	2.88238e-05	1
NFYB	ENCFF010MMQ	ENCFF785ACI	ARHGAP35	PRPF4	8952	85	469	18	4.45319	8.62485e-07	0.0933562
NFYB	ENCFF010MMQ	ENCFF694BIA	ARHGAP35	PTBP1	8952	85	157	6	1.49073	0.00343276	1
NFYB	ENCFF010MMQ	ENCFF007DKB	ARHGAP35	PTRF	8952	85	51	0	0.484249	0.61616	1
NFYB	ENCFF010MMQ	ENCFF332DRG	ARHGAP35	PTTG1	8952	85	42	1	0.398794	0.267642	1
NFYB	ENCFF010MMQ	ENCFF421KIV	ARHGAP35	PYGO2	8952	85	78	8	0.740617	1.07049e-06	0.115871
NFYB	ENCFF010MMQ	ENCFF002CXU	ARHGAP35	RAD21	8952	85	149	0	1.41477	0.242982	1
NFYB	ENCFF010MMQ	ENCFF096XMD	ARHGAP35	RAD51	8952	85	2127	26	20.196	0.0363308	1
NFYB	ENCFF010MMQ	ENCFF975IRM	ARHGAP35	RB1	8952	85	1520	38	14.4325	1.17091e-07	0.0126741
NFYB	ENCFF010MMQ	ENCFF379MPS	ARHGAP35	RBBP5	8952	85	894	27	8.48861	2.26488e-07	0.0245152
NFYB	ENCFF010MMQ	ENCFF120IDE	ARHGAP35	RBFOX2	8952	85	2507	59	23.8042	5.52702e-10	5.98251e-05
NFYB	ENCFF010MMQ	ENCFF682SIY	ARHGAP35	RBM14	8952	85	97	4	0.921023	0.0119365	1
NFYB	ENCFF010MMQ	ENCFF971VJZ	ARHGAP35	RBM15	8952	85	15	2	0.142426	0.0087962	1
NFYB	ENCFF010MMQ	ENCFF861YKK	ARHGAP35	RBM17	8952	85	0	0	0	1	1
NFYB	ENCFF010MMQ	ENCFF522JUV	ARHGAP35	RBM22	8952	85	421	12	3.99743	0.000638223	1
NFYB	ENCFF010MMQ	ENCFF680WBN	ARHGAP35	RBM25	8952	85	3467	68	32.9195	3.1303e-08	0.00338827
NFYB	ENCFF010MMQ	ENCFF782GWS	ARHGAP35	RBM34	8952	85	121	1	1.14891	0.364184	1
NFYB	ENCFF010MMQ	ENCFF209JJD	ARHGAP35	RBM39	8952	85	81	1	0.769102	0.356424	1
NFYB	ENCFF010MMQ	ENCFF484CKD	ARHGAP35	RCOR1	8952	85	331	9	3.14287	0.00355833	1
NFYB	ENCFF010MMQ	ENCFF580QGA	ARHGAP35	RELA	8952	85	141	4	1.33881	0.0350933	1
NFYB	ENCFF010MMQ	ENCFF237UAN_ENCFF010UHD	ARHGAP35	RFX1	8952	85	750	10	7.12131	0.0746605	1
NFYB	ENCFF010MMQ	ENCFF716LRI	ARHGAP35	RFX5	8952	85	575	8	5.45967	0.0833119	1
NFYB	ENCFF010MMQ	ENCFF209HKW	ARHGAP35	RLF	8952	85	270	10	2.56367	0.0002603	1
NFYB	ENCFF010MMQ	ENCFF478MPX	ARHGAP35	SAFB	8952	85	329	6	3.12388	0.0567742	1
NFYB	ENCFF010MMQ	ENCFF624NUZ	ARHGAP35	SAFB2	8952	85	2	0	0.0189902	0.981189	1
NFYB	ENCFF010MMQ	ENCFF718NUA	ARHGAP35	SAP30	8952	85	676	23	6.41868	2.35048e-07	0.0254419
NFYB	ENCFF010MMQ	ENCFF294EHN	ARHGAP35	SETDB1	8952	85	286	11	2.71559	9.81726e-05	1
NFYB	ENCFF010MMQ	ENCFF757ODD	ARHGAP35	SFPQ	8952	85	10	4	0.0949508	3.07998e-06	0.33338
NFYB	ENCFF010MMQ	ENCFF191MPD	ARHGAP35	SIN3A	8952	85	1094	24	10.3876	0.000123707	1
NFYB	ENCFF010MMQ	ENCFF280GTU	ARHGAP35	SIN3B	8952	85	744	24	7.06434	3.28861e-07	0.0355962
NFYB	ENCFF010MMQ	ENCFF002CXZ	ARHGAP35	SIRT6	8952	85	107	3	1.01597	0.0632797	1
NFYB	ENCFF010MMQ	ENCFF033EBX_ENCFF002CMM	ARHGAP35	SIX5	8952	85	637	19	6.04837	1.37803e-05	1
NFYB	ENCFF010MMQ	ENCFF481WGW	ARHGAP35	SKIL	8952	85	1358	38	12.8943	7.52823e-09	0.000814863
NFYB	ENCFF010MMQ	ENCFF315YAF	ARHGAP35	SMAD1	8952	85	815	31	7.73849	1.87302e-10	2.02738e-05
NFYB	ENCFF010MMQ	ENCFF011KRN	ARHGAP35	SMAD2	8952	85	14	0	0.132931	0.875525	1
NFYB	ENCFF010MMQ	ENCFF178MOP	ARHGAP35	SMAD5	8952	85	2109	56	20.0251	2.1855e-11	2.3656e-06
NFYB	ENCFF010MMQ	ENCFF995NIE	ARHGAP35	SMARCA5	8952	85	88	3	0.835567	0.042161	1
NFYB	ENCFF010MMQ	ENCFF944GJH	ARHGAP35	SMARCB1	8952	85	77	3	0.731122	0.0313542	1
NFYB	ENCFF010MMQ	ENCFF114PTZ	ARHGAP35	SMARCC2	8952	85	259	5	2.45923	0.0640889	1
NFYB	ENCFF010MMQ	ENCFF622RBW	ARHGAP35	SMARCE1	8952	85	489	12	4.6431	0.00201783	1
NFYB	ENCFF010MMQ	ENCFF041YQC	ARHGAP35	SMC3	8952	85	438	7	4.15885	0.0667138	1
NFYB	ENCFF010MMQ	ENCFF494ZUY	ARHGAP35	SNIP1	8952	85	103	4	0.977994	0.0143349	1
NFYB	ENCFF010MMQ	ENCFF033KXY	ARHGAP35	SNRNP70	8952	85	3	0	0.0284853	0.971917	1
NFYB	ENCFF010MMQ	ENCFF241TBP	ARHGAP35	SOX6	8952	85	1337	41	12.6949	1.62583e-10	1.75981e-05
NFYB	ENCFF010MMQ	ENCFF300XUA	ARHGAP35	SP1	8952	85	2565	71	24.3549	8.72495e-15	9.44397e-10
NFYB	ENCFF010MMQ	ENCFF002CMJ	ARHGAP35	SPI1	8952	85	872	21	8.27971	9.42202e-05	1
NFYB	ENCFF010MMQ	ENCFF985TSH	ARHGAP35	SREBF1	8952	85	462	9	4.38673	0.020624	1
NFYB	ENCFF010MMQ	ENCFF798URE	ARHGAP35	SRSF1	8952	85	94	5	0.892538	0.00193343	1
NFYB	ENCFF010MMQ	ENCFF722XRW	ARHGAP35	SRSF3	8952	85	23	4	0.218387	7.61818e-05	1
NFYB	ENCFF010MMQ	ENCFF059WVE	ARHGAP35	SRSF7	8952	85	3	0	0.0284853	0.971917	1
NFYB	ENCFF010MMQ	ENCFF137IBM	ARHGAP35	SRSF9	8952	85	0	0	0	1	1
NFYB	ENCFF010MMQ	ENCFF290HTJ	ARHGAP35	STAT1_0	8952	85	77	3	0.731122	0.0313542	1
NFYB	ENCFF010MMQ	ENCFF254MPF	ARHGAP35	STAT1_1	8952	85	79	2	0.750112	0.132878	1
NFYB	ENCFF010MMQ	ENCFF498DOQ	ARHGAP35	STAT1_2	8952	85	44	0	0.417784	0.658505	1
NFYB	ENCFF010MMQ	ENCFF648NYF	ARHGAP35	STAT1_3	8952	85	195	7	1.85154	0.00232375	1
NFYB	ENCFF010MMQ	ENCFF841YFF	ARHGAP35	STAT2_0	8952	85	112	7	1.06345	0.000105375	1
NFYB	ENCFF010MMQ	ENCFF714VIT	ARHGAP35	STAT2_1	8952	85	248	15	2.35478	2.7548e-08	0.00298182
NFYB	ENCFF010MMQ	ENCFF696KPD	ARHGAP35	STAT5A	8952	85	409	13	3.88349	0.000151018	1
NFYB	ENCFF010MMQ	ENCFF484HCG	ARHGAP35	SUPT5H	8952	85	1504	50	14.2806	1.1279e-13	1.22085e-08
NFYB	ENCFF010MMQ	ENCFF822FWM	ARHGAP35	TAF1	8952	85	2161	56	20.5189	5.21793e-11	5.64794e-06
NFYB	ENCFF010MMQ	ENCFF617CAZ	ARHGAP35	TAF15	8952	85	30	4	0.284853	0.000206329	1
NFYB	ENCFF010MMQ	ENCFF034CQR	ARHGAP35	TAF7	8952	85	37	1	0.351318	0.247244	1
NFYB	ENCFF010MMQ	ENCFF785HXY	ARHGAP35	TAF9B	8952	85	1088	42	10.3307	9.10211e-14	9.85221e-09
NFYB	ENCFF010MMQ	ENCFF284LRP_ENCFF482CEV	ARHGAP35	TAL1	8952	85	296	4	2.81055	0.15644	1
NFYB	ENCFF010MMQ	ENCFF626MVT	ARHGAP35	TBL1XR1	8952	85	1010	32	9.59004	6.81045e-09	0.00073717
NFYB	ENCFF010MMQ	ENCFF380FJL	ARHGAP35	TBP	8952	85	2571	64	24.4119	1.26213e-11	1.36615e-06
NFYB	ENCFF010MMQ	ENCFF249EZR	ARHGAP35	TCF7	8952	85	387	11	3.6746	0.00104784	1
NFYB	ENCFF010MMQ	ENCFF312RFN	ARHGAP35	TCF7L2	8952	85	222	12	2.10791	1.95178e-06	0.211263
NFYB	ENCFF010MMQ	ENCFF619BDC	ARHGAP35	TEAD2	8952	85	142	2	1.3483	0.236039	1
NFYB	ENCFF010MMQ	ENCFF209MQX	ARHGAP35	TEAD4	8952	85	1125	36	10.682	6.63428e-10	7.18101e-05
NFYB	ENCFF010MMQ	ENCFF701MXF	ARHGAP35	TFDP1	8952	85	1406	38	13.3501	1.78652e-08	0.00193375
NFYB	ENCFF010MMQ	ENCFF641LJY	ARHGAP35	THAP1	8952	85	728	29	6.91242	2.516e-10	2.72335e-05
NFYB	ENCFF010MMQ	ENCFF671BFH	ARHGAP35	THRA	8952	85	30	0	0.284853	0.752125	1
NFYB	ENCFF010MMQ	ENCFF294VWT	ARHGAP35	THRAP3	8952	85	24	2	0.227882	0.0206739	1
NFYB	ENCFF010MMQ	ENCFF262BVP	ARHGAP35	TOE1	8952	85	1364	32	12.9513	3.5414e-06	0.383325
NFYB	ENCFF010MMQ	ENCFF049CRW_ENCFF646VQW	ARHGAP35	TRIM24	8952	85	277	7	2.63014	0.0124499	1
NFYB	ENCFF010MMQ	ENCFF561IZB	ARHGAP35	TRIP13	8952	85	251	4	2.38327	0.124005	1
NFYB	ENCFF010MMQ	ENCFF036YVI	ARHGAP35	TSC22D4	8952	85	8	0	0.0759607	0.926853	1
NFYB	ENCFF010MMQ	ENCFF730URE	ARHGAP35	U2AF1	8952	85	234	6	2.22185	0.0181142	1
NFYB	ENCFF010MMQ	ENCFF398EQF	ARHGAP35	U2AF2	8952	85	0	0	0	1	1
NFYB	ENCFF010MMQ	ENCFF671DOL	ARHGAP35	UBTF	8952	85	903	21	8.57406	0.000146186	1
NFYB	ENCFF010MMQ	ENCFF334FMW	ARHGAP35	USF1	8952	85	2749	25	26.102	0.0776684	1
NFYB	ENCFF010MMQ	ENCFF150VTD	ARHGAP35	USF2	8952	85	1020	9	9.68499	0.128526	1
NFYB	ENCFF010MMQ	ENCFF186QUP	ARHGAP35	VEZF1	8952	85	2580	59	24.4973	1.50287e-09	0.000162672
NFYB	ENCFF010MMQ	ENCFF803LEC	ARHGAP35	XRCC3	8952	85	7	1	0.0664656	0.0621915	1
NFYB	ENCFF010MMQ	ENCFF998KKJ	ARHGAP35	XRCC5	8952	85	805	26	7.64354	1.09773e-07	0.0118819
NFYB	ENCFF010MMQ	ENCFF706LIT	ARHGAP35	YBX1	8952	85	3	2	0.0284853	0.000394311	1
NFYB	ENCFF010MMQ	ENCFF246HIU	ARHGAP35	YBX3	8952	85	165	6	1.56669	0.00428706	1
NFYB	ENCFF010MMQ	ENCFF926FUM_ENCFF328XKC	ARHGAP35	YY1	8952	85	1295	37	12.2961	6.95919e-09	0.000753269
NFYB	ENCFF010MMQ	ENCFF253FON	ARHGAP35	ZBED1	8952	85	411	15	3.90248	1.14495e-05	1
NFYB	ENCFF010MMQ	ENCFF434QZL	ARHGAP35	ZBTB11	8952	85	532	23	5.05139	3.73386e-09	0.000404157
NFYB	ENCFF010MMQ	ENCFF561USY	ARHGAP35	ZBTB2	8952	85	733	18	6.9599	0.000217703	1
NFYB	ENCFF010MMQ	ENCFF408FQC	ARHGAP35	ZBTB33	8952	85	476	8	4.51966	0.0470395	1
NFYB	ENCFF010MMQ	ENCFF417LEJ	ARHGAP35	ZBTB40	8952	85	1286	46	12.2107	8.83958e-14	9.56805e-09
NFYB	ENCFF010MMQ	ENCFF706ISJ	ARHGAP35	ZBTB7A	8952	85	1354	40	12.8563	7.40655e-10	8.01692e-05
NFYB	ENCFF010MMQ	ENCFF589EVD	ARHGAP35	ZBTB8A	8952	85	14	1	0.132931	0.116385	1
NFYB	ENCFF010MMQ	ENCFF522JRK	ARHGAP35	ZC3H11A	8952	85	160	6	1.51921	0.00373761	1
NFYB	ENCFF010MMQ	ENCFF809OEX	ARHGAP35	ZC3H8	8952	85	273	16	2.59216	1.48664e-08	0.00160915
NFYB	ENCFF010MMQ	ENCFF521CRG	ARHGAP35	ZFP36	8952	85	420	16	3.98794	3.62587e-06	0.392468
NFYB	ENCFF010MMQ	ENCFF396DNK	ARHGAP35	ZFP91	8952	85	377	12	3.57965	0.000257706	1
NFYB	ENCFF010MMQ	ENCFF433RKB	ARHGAP35	ZFX	8952	85	920	25	8.73548	3.52981e-06	0.38207
NFYB	ENCFF010MMQ	ENCFF195ODE	ARHGAP35	ZHX1	8952	85	290	51	2.75357	1.11746e-45	1.20955e-40
NFYB	ENCFF010MMQ	ENCFF163VUK	ARHGAP35	ZKSCAN1	8952	85	665	22	6.31423	6.51701e-07	0.0705408
NFYB	ENCFF010MMQ	ENCFF529FWJ	ARHGAP35	ZKSCAN8	8952	85	176	5	1.67113	0.0204226	1
NFYB	ENCFF010MMQ	ENCFF597DIY	ARHGAP35	ZMIZ1	8952	85	73	4	0.693141	0.00480893	1
NFYB	ENCFF010MMQ	ENCFF511QHY	ARHGAP35	ZMYM3	8952	85	80	2	0.759607	0.134975	1
NFYB	ENCFF010MMQ	ENCFF114IWY	ARHGAP35	ZNF143	8952	85	1419	25	13.4735	0.00156642	1
NFYB	ENCFF010MMQ	ENCFF116DIO	ARHGAP35	ZNF148	8952	85	844	22	8.01385	2.25616e-05	1
NFYB	ENCFF010MMQ	ENCFF721LDD	ARHGAP35	ZNF175	8952	85	526	14	4.99441	0.000467013	1
NFYB	ENCFF010MMQ	ENCFF853TZC	ARHGAP35	ZNF197	8952	85	375	17	3.56066	1.8992e-07	0.0205571
NFYB	ENCFF010MMQ	ENCFF891MVM	ARHGAP35	ZNF263	8952	85	94	3	0.892538	0.0485405	1
NFYB	ENCFF010MMQ	ENCFF344QKL	ARHGAP35	ZNF274	8952	85	56	2	0.531725	0.0830651	1
NFYB	ENCFF010MMQ	ENCFF386WKY	ARHGAP35	ZNF280A	8952	85	31	1	0.294348	0.219294	1
NFYB	ENCFF010MMQ	ENCFF581ZZT	ARHGAP35	ZNF282	8952	85	554	58	5.26028	1.45485e-39	1.57475e-34
NFYB	ENCFF010MMQ	ENCFF921WMN	ARHGAP35	ZNF318	8952	85	328	14	3.11439	4.11385e-06	0.445287
NFYB	ENCFF010MMQ	ENCFF744SVC	ARHGAP35	ZNF354B	8952	85	134	2	1.27234	0.226781	1
NFYB	ENCFF010MMQ	ENCFF706SJZ	ARHGAP35	ZNF384	8952	85	618	13	5.86796	0.00444254	1
NFYB	ENCFF010MMQ	ENCFF388YOB	ARHGAP35	ZNF395	8952	85	1005	29	9.54256	2.08671e-07	0.0225868
NFYB	ENCFF010MMQ	ENCFF834WGJ	ARHGAP35	ZNF507	8952	85	2	0	0.0189902	0.981189	1
NFYB	ENCFF010MMQ	ENCFF447QUG	ARHGAP35	ZNF512	8952	85	27	0	0.256367	0.773858	1
NFYB	ENCFF010MMQ	ENCFF815TTY	ARHGAP35	ZNF584	8952	85	348	13	3.30429	3.30142e-05	1
NFYB	ENCFF010MMQ	ENCFF602AXP	ARHGAP35	ZNF589	8952	85	618	14	5.86796	0.00186205	1
NFYB	ENCFF010MMQ	ENCFF273TYA	ARHGAP35	ZNF592	8952	85	654	13	6.20979	0.00658931	1
NFYB	ENCFF010MMQ	ENCFF173NRW	ARHGAP35	ZNF644	8952	85	389	13	3.69359	9.51579e-05	1
NFYB	ENCFF010MMQ	ENCFF248AOD	ARHGAP35	ZNF766	8952	85	817	22	7.75748	1.42581e-05	1
NFYB	ENCFF010MMQ	ENCFF654BMD	ARHGAP35	ZNF83	8952	85	418	11	3.96895	0.00182213	1
NFYB	ENCFF010MMQ	ENCFF996IVU	ARHGAP35	ZNF830	8952	85	80	2	0.759607	0.134975	1
NFYB	ENCFF010MMQ	ENCFF253NXR	ARHGAP35	ZSCAN29	8952	85	356	16	3.38025	4.72648e-07	0.0511599
NFYB	ENCFF010MMQ	ENCFF588OLK	ARHGAP35	ZZZ3	8952	85	153	17	1.45275	3.7605e-13	4.07041e-08
NFYB	ENCFF225MPC	ENCFF836VRV	ARID1B	37104	8952	675	401	33	30.2363	0.0612773	1
NFYB	ENCFF225MPC	ENCFF396GUH	ARID1B	ADNP	8952	675	127	58	9.57607	2.39256e-26	2.58973e-21
NFYB	ENCFF225MPC	ENCFF360BTO	ARID1B	AFF1	8952	675	543	210	40.9434	5.65563e-78	6.12171e-73
NFYB	ENCFF225MPC	ENCFF010MMQ	ARID1B	ARHGAP35	8952	675	85	11	6.40918	0.0309172	1
NFYB	ENCFF225MPC	ENCFF225MPC	ARID1B	ARID1B	8952	675	675	675	50.8964	0	0
NFYB	ENCFF225MPC	ENCFF332ICQ	ARID1B	ARID2	8952	675	79	18	5.95677	3.60463e-05	1
NFYB	ENCFF225MPC	ENCFF835KAT	ARID1B	ARID3A	8952	675	570	185	42.9792	7.44786e-58	8.06164e-53
NFYB	ENCFF225MPC	ENCFF235ZZP	ARID1B	ASH1L	8952	675	2325	128	175.31	3.05444e-05	1
NFYB	ENCFF225MPC	ENCFF002CVM	ARID1B	ATF1	8952	675	1593	279	120.116	1.84192e-35	1.99371e-30
NFYB	ENCFF225MPC	ENCFF968KBN	ARID1B	ATF2	8952	675	826	175	62.2822	8.20186e-32	8.87777e-27
NFYB	ENCFF225MPC	ENCFF958KNK	ARID1B	ATF3	8952	675	1033	313	77.8904	2.44872e-89	2.65051e-84
NFYB	ENCFF225MPC	ENCFF710IEF	ARID1B	ATF4	8952	675	426	129	32.1213	5.36385e-38	5.80588e-33
NFYB	ENCFF225MPC	ENCFF868QLL	ARID1B	ATF7	8952	675	2939	457	221.607	7.09012e-44	7.67442e-39
NFYB	ENCFF225MPC	ENCFF423EMU	ARID1B	BACH1	8952	675	116	48	8.74665	2.06953e-20	2.24008e-15
NFYB	ENCFF225MPC	ENCFF057ZUY	ARID1B	BCOR	8952	675	382	159	28.8036	1.18439e-63	1.28199e-58
NFYB	ENCFF225MPC	ENCFF002CVP	ARID1B	BDP1	8952	675	13	2	0.980228	0.180267	1
NFYB	ENCFF225MPC	ENCFF179NDS	ARID1B	BHLHE40	8952	675	1665	294	125.545	7.5571e-38	8.17988e-33
NFYB	ENCFF225MPC	ENCFF048OIZ	ARID1B	BMI1	8952	675	278	23	20.9618	0.0752954	1
NFYB	ENCFF225MPC	ENCFF549GMO	ARID1B	BRCA1	8952	675	1	0	0.0754021	0.92737	1
NFYB	ENCFF225MPC	ENCFF714XHL	ARID1B	BRD4	8952	675	160	39	12.0643	4.26168e-10	4.61289e-05
NFYB	ENCFF225MPC	ENCFF666LZV	ARID1B	BRD9	8952	675	305	121	22.9977	7.37521e-47	7.98301e-42
NFYB	ENCFF225MPC	ENCFF002CVR	ARID1B	BRF1	8952	675	10	2	0.754021	0.133743	1
NFYB	ENCFF225MPC	ENCFF002CVS	ARID1B	BRF2	8952	675	7	0	0.527815	0.589892	1
NFYB	ENCFF225MPC	ENCFF996ZGL	ARID1B	C11orf30	8952	675	1723	255	129.918	1.09096e-22	1.18087e-17
NFYB	ENCFF225MPC	ENCFF642BNC	ARID1B	CBFA2T2	8952	675	1271	315	95.8361	5.58715e-70	6.04759e-65
NFYB	ENCFF225MPC	ENCFF993GXU	ARID1B	CBFA2T3	8952	675	635	409	47.8804	1.30852e-226	1.41635e-221
NFYB	ENCFF225MPC	ENCFF484DKT	ARID1B	CBX1	8952	675	963	134	72.6123	3.47326e-11	3.75949e-06
NFYB	ENCFF225MPC	ENCFF455TDM	ARID1B	CBX3	8952	675	1458	269	109.936	8.51139e-38	9.21282e-33
NFYB	ENCFF225MPC	ENCFF062ARS	ARID1B	CBX5	8952	675	211	57	15.9099	9.49874e-16	1.02815e-10
NFYB	ENCFF225MPC	ENCFF456PQY	ARID1B	CBX8	8952	675	3	0	0.226206	0.797553	1
NFYB	ENCFF225MPC	ENCFF874QUM	ARID1B	CC2D1A	8952	675	1405	307	105.94	6.58282e-57	7.1253e-52
NFYB	ENCFF225MPC	ENCFF583GKE	ARID1B	CCAR2	8952	675	26	12	1.96046	9.47398e-07	0.102547
NFYB	ENCFF225MPC	ENCFF002CVU	ARID1B	CCNT2	8952	675	1787	291	134.744	8.39767e-32	9.08972e-27
NFYB	ENCFF225MPC	ENCFF643TEZ	ARID1B	CDC5L	8952	675	74	24	5.57976	5.04436e-09	0.000546006
NFYB	ENCFF225MPC	ENCFF813LOW_ENCFF429XKT	ARID1B	CEBPB	8952	675	594	166	44.7889	4.87823e-44	5.28025e-39
NFYB	ENCFF225MPC	ENCFF925MHB	ARID1B	CEBPZ	8952	675	593	24	44.7135	0.000250612	1
NFYB	ENCFF225MPC	ENCFF859FVX	ARID1B	CHAMP1	8952	675	684	199	51.5751	6.03802e-55	6.53562e-50
NFYB	ENCFF225MPC	ENCFF684MLP	ARID1B	COPS2	8952	675	11	0	0.829424	0.436301	1
NFYB	ENCFF225MPC	ENCFF665FHC	ARID1B	CREB3	8952	675	330	91	24.8827	1.22825e-24	1.32947e-19
NFYB	ENCFF225MPC	ENCFF582YPB	ARID1B	CREB3L1	8952	675	1553	221	117.1	3.90794e-18	4.22999e-13
NFYB	ENCFF225MPC	ENCFF948TXN	ARID1B	CREM	8952	675	3223	437	243.021	1.4474e-29	1.56668e-24
NFYB	ENCFF225MPC	ENCFF117EWO	ARID1B	CSDE1	8952	675	467	69	35.2128	1.57148e-07	0.0170098
NFYB	ENCFF225MPC	ENCFF152VMJ	ARID1B	CTBP1	8952	675	2152	415	162.265	6.40988e-62	6.93812e-57
NFYB	ENCFF225MPC	ENCFF002DDJ_ENCFF002DBD	ARID1B	CTCF	8952	675	445	65	33.554	4.83853e-07	0.0523728
NFYB	ENCFF225MPC	ENCFF962FQM	ARID1B	CTCFL	8952	675	434	57	32.7245	3.37255e-05	1
NFYB	ENCFF225MPC	ENCFF517YCC	ARID1B	CUX1	8952	675	205	90	15.4574	1.37203e-38	1.4851e-33
NFYB	ENCFF225MPC	ENCFF526HLP	ARID1B	DACH1	8952	675	492	166	37.0979	2.7931e-54	3.02328e-49
NFYB	ENCFF225MPC	ENCFF338HQY	ARID1B	DDX20	8952	675	2080	234	156.836	1.84477e-09	0.00019968
NFYB	ENCFF225MPC	ENCFF786WZD	ARID1B	DEAF1	8952	675	775	55	58.4367	0.0484503	1
NFYB	ENCFF225MPC	ENCFF408SNO	ARID1B	DIDO1	8952	675	566	91	42.6776	4.81485e-11	5.21164e-06
NFYB	ENCFF225MPC	ENCFF034PQD	ARID1B	DNMT1	8952	675	43	11	3.24229	0.000407482	1
NFYB	ENCFF225MPC	ENCFF774QKS_ENCFF823SYE	ARID1B	DPF2	8952	675	347	265	26.1645	4.44535e-165	4.81169e-160
NFYB	ENCFF225MPC	ENCFF106DAY	ARID1B	E2F1	8952	675	2426	329	182.926	8.17269e-23	8.84621e-18
NFYB	ENCFF225MPC	ENCFF225TLP	ARID1B	E2F4	8952	675	1863	166	140.474	0.0034629	1
NFYB	ENCFF225MPC	ENCFF356ASJ	ARID1B	E2F5	8952	675	1026	206	77.3626	4.90981e-34	5.31443e-29
NFYB	ENCFF225MPC	ENCFF417DTI_ENCFF917COW	ARID1B	E2F6	8952	675	1561	162	117.703	1.81961e-05	1
NFYB	ENCFF225MPC	ENCFF310AGG	ARID1B	E2F7	8952	675	371	65	27.9742	9.4162e-10	0.000101922
NFYB	ENCFF225MPC	ENCFF925DJG	ARID1B	E2F8	8952	675	1153	183	86.9387	1.08598e-19	1.17548e-14
NFYB	ENCFF225MPC	ENCFF083YCQ	ARID1B	E4F1	8952	675	2631	391	198.383	5.50018e-34	5.95345e-29
NFYB	ENCFF225MPC	ENCFF806BDC	ARID1B	EHMT2	8952	675	463	150	34.9112	3.35793e-47	3.63466e-42
NFYB	ENCFF225MPC	ENCFF502KHR	ARID1B	ELF4	8952	675	1900	262	143.264	1.86643e-19	2.02025e-14
NFYB	ENCFF225MPC	ENCFF019PEL	ARID1B	ELK1	8952	675	476	60	35.8914	6.19182e-05	1
NFYB	ENCFF225MPC	ENCFF549TYR	ARID1B	EP300	8952	675	1149	421	86.6371	2.82597e-146	3.05886e-141
NFYB	ENCFF225MPC	ENCFF925ANU	ARID1B	EP400	8952	675	1839	361	138.665	7.42228e-56	8.03395e-51
NFYB	ENCFF225MPC	ENCFF213EPU	ARID1B	ESRRA	8952	675	1586	284	119.588	1.25343e-37	1.35672e-32
NFYB	ENCFF225MPC	ENCFF076YZO	ARID1B	ETS1	8952	675	976	134	73.5925	7.85928e-11	8.50696e-06
NFYB	ENCFF225MPC	ENCFF772HOY	ARID1B	ETS2	8952	675	22	3	1.65885	0.144824	1
NFYB	ENCFF225MPC	ENCFF404YMX	ARID1B	ETV1	8952	675	948	228	71.4812	3.49671e-49	3.78488e-44
NFYB	ENCFF225MPC	ENCFF545VNY	ARID1B	ETV6	8952	675	250	94	18.8505	4.54327e-35	4.91768e-30
NFYB	ENCFF225MPC	ENCFF820EVZ	ARID1B	EWSR1	8952	675	10	4	0.754021	0.0063366	1
NFYB	ENCFF225MPC	ENCFF883WYX	ARID1B	FIP1L1	8952	675	674	63	50.821	0.0129482	1
NFYB	ENCFF225MPC	ENCFF002CVW	ARID1B	FOS	8952	675	3625	274	273.333	0.0240741	1
NFYB	ENCFF225MPC	ENCFF473GCH	ARID1B	FOSL1	8952	675	202	108	15.2312	9.96434e-54	1.07855e-48
NFYB	ENCFF225MPC	ENCFF809YFY	ARID1B	FOXA1	8952	675	17	9	1.28184	7.14556e-06	0.773442
NFYB	ENCFF225MPC	ENCFF452SPE	ARID1B	FOXJ2	8952	675	719	147	54.2141	1.35611e-25	1.46786e-20
NFYB	ENCFF225MPC	ENCFF699ZII	ARID1B	FOXM1	8952	675	1366	321	102.999	3.5955e-66	3.89181e-61
NFYB	ENCFF225MPC	ENCFF142CPK	ARID1B	FUS	8952	675	197	12	14.8542	0.085262	1
NFYB	ENCFF225MPC	ENCFF833FCO	ARID1B	GABPA	8952	675	1778	237	134.065	2.99147e-16	3.238e-11
NFYB	ENCFF225MPC	ENCFF517KRT	ARID1B	GABPB1	8952	675	2338	286	176.29	8.30876e-15	8.99349e-10
NFYB	ENCFF225MPC	ENCFF632NQI	ARID1B	GATA1	8952	675	472	237	35.5898	5.41438e-110	5.86058e-105
NFYB	ENCFF225MPC	ENCFF732HOE	ARID1B	GATA2	8952	675	327	218	24.6565	1.14044e-124	1.23442e-119
NFYB	ENCFF225MPC	ENCFF253FZN	ARID1B	GATAD2A	8952	675	324	128	24.4303	2.87589e-49	3.11289e-44
NFYB	ENCFF225MPC	ENCFF549KOD	ARID1B	GATAD2B	8952	675	474	146	35.7406	1.47798e-43	1.59978e-38
NFYB	ENCFF225MPC	ENCFF126BCK	ARID1B	GMEB1	8952	675	1653	292	124.64	1.23495e-37	1.33673e-32
NFYB	ENCFF225MPC	ENCFF167HYX	ARID1B	GTF2A2	8952	675	175	36	13.1954	1.08136e-07	0.0117047
NFYB	ENCFF225MPC	ENCFF002CWR	ARID1B	GTF2B	8952	675	606	82	45.6937	3.86074e-07	0.041789
NFYB	ENCFF225MPC	ENCFF778RMG	ARID1B	GTF2E2	8952	675	780	126	58.8137	1.08809e-14	1.17776e-09
NFYB	ENCFF225MPC	ENCFF002CYL	ARID1B	GTF3C2	8952	675	36	9	2.71448	0.0014606	1
NFYB	ENCFF225MPC	ENCFF474NLG	ARID1B	HCFC1	8952	675	1895	174	142.887	0.00127586	1
NFYB	ENCFF225MPC	ENCFF580DYE	ARID1B	HDAC3	8952	675	261	169	19.68	3.25732e-95	3.52575e-90
NFYB	ENCFF225MPC	ENCFF998HOR	ARID1B	HDAC6	8952	675	85	13	6.40918	0.00814107	1
NFYB	ENCFF225MPC	ENCFF939ZFS	ARID1B	HDAC8	8952	675	232	46	17.4933	6.82787e-09	0.000739055
NFYB	ENCFF225MPC	ENCFF676NPW	ARID1B	HES1	8952	675	504	179	38.0027	1.7167e-61	1.85817e-56
NFYB	ENCFF225MPC	ENCFF265LKN	ARID1B	HINFP	8952	675	226	40	17.0409	8.85683e-07	0.0958672
NFYB	ENCFF225MPC	ENCFF396NSO	ARID1B	HLTF	8952	675	195	81	14.7034	2.5826e-33	2.79543e-28
NFYB	ENCFF225MPC	ENCFF558DSF	ARID1B	HMBOX1	8952	675	512	200	38.6059	4.65066e-75	5.03392e-70
NFYB	ENCFF225MPC	ENCFF002CWT	ARID1B	HMGN3	8952	675	1513	197	114.083	5.32975e-13	5.76897e-08
NFYB	ENCFF225MPC	ENCFF292JRY	ARID1B	HNRNPH1	8952	675	15	4	1.13103	0.0220033	1
NFYB	ENCFF225MPC	ENCFF777CWV	ARID1B	HNRNPK	8952	675	381	18	28.7282	0.00926209	1
NFYB	ENCFF225MPC	ENCFF010STZ	ARID1B	HNRNPL	8952	675	398	50	30.0101	0.000222363	1
NFYB	ENCFF225MPC	ENCFF122QSN	ARID1B	HNRNPLL	8952	675	1631	158	122.981	0.000328462	1
NFYB	ENCFF225MPC	ENCFF768TJI	ARID1B	HNRNPUL1	8952	675	26	9	1.96046	0.000165972	1
NFYB	ENCFF225MPC	ENCFF835YLR	ARID1B	ID3	8952	675	578	143	43.5824	8.09065e-33	8.7574e-28
NFYB	ENCFF225MPC	ENCFF415YPX	ARID1B	ILF3	8952	675	112	31	8.44504	1.38675e-09	0.000150103
NFYB	ENCFF225MPC	ENCFF176NOI	ARID1B	ILK	8952	675	11	5	0.829424	0.00142721	1
NFYB	ENCFF225MPC	ENCFF388AJH	ARID1B	IRF1	8952	675	182	46	13.7232	4.19236e-12	4.53785e-07
NFYB	ENCFF225MPC	ENCFF284VUQ	ARID1B	IRF1_0	8952	675	3230	289	243.549	0.000429959	1
NFYB	ENCFF225MPC	ENCFF909LKK	ARID1B	IRF1_1	8952	675	1104	159	83.244	5.18035e-14	5.60726e-09
NFYB	ENCFF225MPC	ENCFF908UIY	ARID1B	IRF1_2	8952	675	1228	184	92.5938	1.95038e-17	2.11111e-12
NFYB	ENCFF225MPC	ENCFF730RUF	ARID1B	IRF1_3	8952	675	70	16	5.27815	8.84742e-05	1
NFYB	ENCFF225MPC	ENCFF384YDT	ARID1B	IRF2	8952	675	787	117	59.3415	1.2956e-11	1.40237e-06
NFYB	ENCFF225MPC	ENCFF196DHR	ARID1B	IRF9	8952	675	162	65	12.2151	2.67371e-26	2.89406e-21
NFYB	ENCFF225MPC	ENCFF629BFI	ARID1B	JUN	8952	675	1372	306	103.452	1.59417e-58	1.72555e-53
NFYB	ENCFF225MPC	ENCFF417QAJ	ARID1B	JUN_0	8952	675	290	138	21.8666	3.57564e-62	3.87031e-57
NFYB	ENCFF225MPC	ENCFF573GQX	ARID1B	JUN_1	8952	675	193	104	14.5526	4.10156e-52	4.43957e-47
NFYB	ENCFF225MPC	ENCFF192BTP	ARID1B	JUN_2	8952	675	185	106	13.9494	1.60486e-55	1.73712e-50
NFYB	ENCFF225MPC	ENCFF077UYM	ARID1B	JUN_3	8952	675	495	153	37.3241	1.00522e-45	1.08806e-40
NFYB	ENCFF225MPC	ENCFF426DUB	ARID1B	JUNB	8952	675	204	72	15.382	9.94646e-26	1.07661e-20
NFYB	ENCFF225MPC	ENCFF337DKJ	ARID1B	JUND	8952	675	2322	473	175.084	3.11008e-77	3.36638e-72
NFYB	ENCFF225MPC	ENCFF772QPO	ARID1B	KAT8	8952	675	66	15	4.97654	0.000150014	1
NFYB	ENCFF225MPC	ENCFF838COI_ENCFF738WCE	ARID1B	KDM1A	8952	675	357	206	26.9186	1.41882e-106	1.53574e-101
NFYB	ENCFF225MPC	ENCFF042RAK	ARID1B	KDM4B	8952	675	695	98	52.4045	5.81787e-09	0.000629732
NFYB	ENCFF225MPC	ENCFF368TYM	ARID1B	KDM5B	8952	675	1661	193	125.243	4.34794e-09	0.000470626
NFYB	ENCFF225MPC	ENCFF962VSZ	ARID1B	KHSRP	8952	675	308	77	23.2239	8.49258e-19	9.19245e-14
NFYB	ENCFF225MPC	ENCFF717TWA	ARID1B	KLF1	8952	675	712	101	53.6863	2.66829e-09	0.000288818
NFYB	ENCFF225MPC	ENCFF802XZN	ARID1B	KLF13	8952	675	655	85	49.3884	1.14607e-06	0.124052
NFYB	ENCFF225MPC	ENCFF844HBQ	ARID1B	KLF16	8952	675	524	219	39.5107	3.19923e-87	3.46288e-82
NFYB	ENCFF225MPC	ENCFF314ULQ	ARID1B	L3MBTL2	8952	675	2628	371	198.157	2.15575e-28	2.33341e-23
NFYB	ENCFF225MPC	ENCFF511OXK	ARID1B	LARP7	8952	675	85	29	6.40918	4.64799e-11	5.03103e-06
NFYB	ENCFF225MPC	ENCFF659WAF	ARID1B	LEF1	8952	675	684	287	51.5751	4.71749e-114	5.10626e-109
NFYB	ENCFF225MPC	ENCFF308IXJ	ARID1B	MAFF	8952	675	384	142	28.9544	3.61539e-51	3.91334e-46
NFYB	ENCFF225MPC	ENCFF927JBT	ARID1B	MAFG	8952	675	569	171	42.9038	2.6924e-49	2.91428e-44
NFYB	ENCFF225MPC	ENCFF812QPN	ARID1B	MAFK	8952	675	603	178	45.4675	3.38573e-50	3.66475e-45
NFYB	ENCFF225MPC	ENCFF799HIG_ENCFF422NGZ	ARID1B	MAX	8952	675	2485	334	187.374	1.48422e-22	1.60654e-17
NFYB	ENCFF225MPC	ENCFF470MLY	ARID1B	MBD2	8952	675	2937	332	221.456	9.25748e-13	1.00204e-07
NFYB	ENCFF225MPC	ENCFF226CZE	ARID1B	MCM2	8952	675	10	6	0.754021	0.000120089	1
NFYB	ENCFF225MPC	ENCFF679ITJ	ARID1B	MCM3	8952	675	7	0	0.527815	0.589892	1
NFYB	ENCFF225MPC	ENCFF920RYJ	ARID1B	MCM5	8952	675	1	0	0.0754021	0.92737	1
NFYB	ENCFF225MPC	ENCFF577UJR	ARID1B	MEF2A	8952	675	40	17	3.01609	1.94807e-08	0.00210861
NFYB	ENCFF225MPC	ENCFF257RYT	ARID1B	MEF2D	8952	675	295	123	22.2436	9.15318e-50	9.90749e-45
NFYB	ENCFF225MPC	ENCFF613RNG	ARID1B	MEIS2	8952	675	2014	366	151.86	3.11206e-49	3.36852e-44
NFYB	ENCFF225MPC	ENCFF670ZCR	ARID1B	MGA	8952	675	1391	212	104.884	1.46146e-20	1.5819e-15
NFYB	ENCFF225MPC	ENCFF365NKO	ARID1B	MIER1	8952	675	112	34	8.44504	2.32627e-11	2.51797e-06
NFYB	ENCFF225MPC	ENCFF497XOD	ARID1B	MITF	8952	675	1452	175	109.484	1.93689e-09	0.000209651
NFYB	ENCFF225MPC	ENCFF973OME_ENCFF059ONJ	ARID1B	MNT	8952	675	1653	229	124.64	1.7658e-17	1.91132e-12
NFYB	ENCFF225MPC	ENCFF769GYG	ARID1B	MTA1	8952	675	635	198	47.8804	3.80178e-59	4.11509e-54
NFYB	ENCFF225MPC	ENCFF350YXB	ARID1B	MTA3	8952	675	2033	334	153.293	7.11037e-37	7.69634e-32
NFYB	ENCFF225MPC	ENCFF970LCB	ARID1B	MXI1	8952	675	1084	134	81.7359	2.92674e-08	0.00316793
NFYB	ENCFF225MPC	ENCFF877ANE	ARID1B	MYBL2	8952	675	512	103	38.6059	4.60507e-18	4.98457e-13
NFYB	ENCFF225MPC	ENCFF465JKF	ARID1B	MYC	8952	675	2224	343	167.694	7.43672e-33	8.04958e-28
NFYB	ENCFF225MPC	ENCFF099SDW	ARID1B	MYC_0	8952	675	1616	286	121.85	4.86831e-37	5.26951e-32
NFYB	ENCFF225MPC	ENCFF634AYU	ARID1B	MYC_1	8952	675	778	141	58.6629	3.8365e-20	4.15267e-15
NFYB	ENCFF225MPC	ENCFF676YJE	ARID1B	MYC_2	8952	675	2518	392	189.863	4.69297e-38	5.07972e-33
NFYB	ENCFF225MPC	ENCFF387LTN	ARID1B	MYC_3	8952	675	1137	206	85.7322	1.76391e-28	1.90927e-23
NFYB	ENCFF225MPC	ENCFF583DZD	ARID1B	MYNN	8952	675	659	207	49.69	3.04407e-62	3.29493e-57
NFYB	ENCFF225MPC	ENCFF074EZL	ARID1B	NBN	8952	675	791	281	59.6431	2.27219e-95	2.45944e-90
NFYB	ENCFF225MPC	ENCFF495CSO	ARID1B	NCOA4	8952	675	30	10	2.26206	0.000100666	1
NFYB	ENCFF225MPC	ENCFF322DSX	ARID1B	NCOA6	8952	675	148	34	11.1595	2.01031e-08	0.00217598
NFYB	ENCFF225MPC	ENCFF165BCW_ENCFF366UBB	ARID1B	NCOR1	8952	675	450	318	33.931	4.75301e-188	5.1447e-183
NFYB	ENCFF225MPC	ENCFF002CXG	ARID1B	NELFE	8952	675	74	14	5.57976	0.0012273	1
NFYB	ENCFF225MPC	ENCFF581YKY	ARID1B	NEUROD1	8952	675	2218	306	167.242	2.15115e-22	2.32843e-17
NFYB	ENCFF225MPC	ENCFF495MHZ	ARID1B	NFE2	8952	675	669	253	50.444	1.54716e-91	1.67467e-86
NFYB	ENCFF225MPC	ENCFF175IUO	ARID1B	NFE2L1	8952	675	58	30	4.37332	7.96856e-16	8.62525e-11
NFYB	ENCFF225MPC	ENCFF370ENX	ARID1B	NFIC	8952	675	926	324	69.8224	5.90413e-108	6.39069e-103
NFYB	ENCFF225MPC	ENCFF157UUF	ARID1B	NFRKB	8952	675	698	114	52.6307	9.09069e-14	9.83985e-09
NFYB	ENCFF225MPC	ENCFF986MHU	ARID1B	NFXL1	8952	675	52	11	3.92091	0.00167214	1
NFYB	ENCFF225MPC	ENCFF012VES	ARID1B	NFYA	8952	675	3615	276	272.579	0.0234984	1
NFYB	ENCFF225MPC	ENCFF113PMT	ARID1B	NFYB	8952	675	8952	675	675	0.0153534	1
NFYB	ENCFF225MPC	ENCFF906PGD	ARID1B	NKRF	8952	675	538	103	40.5664	1.06559e-16	1.1534e-11
NFYB	ENCFF225MPC	ENCFF776YPS	ARID1B	NONO	8952	675	511	130	38.5305	4.07683e-31	4.41281e-26
NFYB	ENCFF225MPC	ENCFF954NAJ	ARID1B	NR0B1	8952	675	0	0	0	1	1
NFYB	ENCFF225MPC	ENCFF664ZGR	ARID1B	NR2C1	8952	675	907	177	68.3897	3.52931e-28	3.82016e-23
NFYB	ENCFF225MPC	ENCFF594LCH	ARID1B	NR2C2	8952	675	79	8	5.95677	0.101759	1
NFYB	ENCFF225MPC	ENCFF175IIE	ARID1B	NR2F1	8952	675	868	277	65.4491	4.93511e-84	5.34182e-79
NFYB	ENCFF225MPC	ENCFF255EOB	ARID1B	NR2F2	8952	675	769	274	57.9842	2.50985e-93	2.71669e-88
NFYB	ENCFF225MPC	ENCFF712AXK	ARID1B	NR2F6	8952	675	484	204	36.4946	5.28137e-82	5.7166e-77
NFYB	ENCFF225MPC	ENCFF859NPS	ARID1B	NR4A1	8952	675	419	120	31.5935	2.54361e-33	2.75323e-28
NFYB	ENCFF225MPC	ENCFF144PPR_ENCFF493ABN	ARID1B	NRF1	8952	675	1920	205	144.772	4.28906e-07	0.0464252
NFYB	ENCFF225MPC	ENCFF289BUU	ARID1B	NUFIP1	8952	675	102	41	7.69102	2.88897e-17	3.12705e-12
NFYB	ENCFF225MPC	ENCFF168HAG	ARID1B	PBX2	8952	675	1779	247	134.14	8.50737e-19	9.20846e-14
NFYB	ENCFF225MPC	ENCFF941RVL	ARID1B	PCBP1	8952	675	622	67	46.9001	0.00109206	1
NFYB	ENCFF225MPC	ENCFF881XQF	ARID1B	PCBP2	8952	675	37	5	2.78988	0.08652	1
NFYB	ENCFF225MPC	ENCFF462FRU	ARID1B	PHB2	8952	675	94	76	7.0878	1.92868e-50	2.08762e-45
NFYB	ENCFF225MPC	ENCFF948YVM	ARID1B	PHF20	8952	675	727	99	54.8174	2.37691e-08	0.00257279
NFYB	ENCFF225MPC	ENCFF134CUM	ARID1B	PHF21A	8952	675	549	135	41.3958	7.60816e-31	8.23515e-26
NFYB	ENCFF225MPC	ENCFF626KTJ	ARID1B	PHF8	8952	675	1055	123	79.5493	1.39958e-06	0.151492
NFYB	ENCFF225MPC	ENCFF544XKC	ARID1B	PKNOX1	8952	675	3439	431	259.308	5.53892e-23	5.99538e-18
NFYB	ENCFF225MPC	ENCFF881QBT	ARID1B	PML	8952	675	1497	304	112.877	3.64348e-50	3.94374e-45
NFYB	ENCFF225MPC	ENCFF662YQK	ARID1B	POLR2A_0	8952	675	2114	241	159.4	3.81758e-10	4.13219e-05
NFYB	ENCFF225MPC	ENCFF853ZMA	ARID1B	POLR2A_1	8952	675	2334	245	175.989	1.49786e-07	0.016213
NFYB	ENCFF225MPC	ENCFF206YXX	ARID1B	POLR2A_2	8952	675	2119	245	159.777	8.57818e-11	9.28511e-06
NFYB	ENCFF225MPC	ENCFF270QAB	ARID1B	POLR2A_3	8952	675	2363	267	178.175	1.15177e-10	1.24668e-05
NFYB	ENCFF225MPC	ENCFF296CNQ	ARID1B	POLR2AphosphoS2	8952	675	671	83	50.5948	7.44136e-06	0.80546
NFYB	ENCFF225MPC	ENCFF542DOG	ARID1B	POLR2AphosphoS5	8952	675	2039	345	153.745	1.95718e-40	2.11847e-35
NFYB	ENCFF225MPC	ENCFF872JJJ	ARID1B	POLR2B	8952	675	1396	173	105.261	3.72188e-10	4.0286e-05
NFYB	ENCFF225MPC	ENCFF273EYJ	ARID1B	POLR2G	8952	675	2355	211	177.572	0.00141454	1
NFYB	ENCFF225MPC	ENCFF801YZV	ARID1B	POLR2H	8952	675	1563	189	117.854	3.92177e-10	4.24497e-05
NFYB	ENCFF225MPC	ENCFF002CXW	ARID1B	POLR3A	8952	675	16	5	1.20643	0.00637367	1
NFYB	ENCFF225MPC	ENCFF002CXT	ARID1B	POLR3G	8952	675	5	2	0.377011	0.0487465	1
NFYB	ENCFF225MPC	ENCFF990CFV	ARID1B	POU5F1	8952	675	302	37	22.7714	0.00156748	1
NFYB	ENCFF225MPC	ENCFF294HEI	ARID1B	PRDM10	8952	675	1321	248	99.6062	3.99183e-36	4.32079e-31
NFYB	ENCFF225MPC	ENCFF785ACI	ARID1B	PRPF4	8952	675	469	48	35.3636	0.00756112	1
NFYB	ENCFF225MPC	ENCFF694BIA	ARID1B	PTBP1	8952	675	157	49	11.8381	4.62958e-16	5.01111e-11
NFYB	ENCFF225MPC	ENCFF007DKB	ARID1B	PTRF	8952	675	51	12	3.84551	0.000466687	1
NFYB	ENCFF225MPC	ENCFF332DRG	ARID1B	PTTG1	8952	675	42	17	3.16689	3.83998e-08	0.00415644
NFYB	ENCFF225MPC	ENCFF421KIV	ARID1B	PYGO2	8952	675	78	35	5.88137	2.30814e-16	2.49836e-11
NFYB	ENCFF225MPC	ENCFF002CXU	ARID1B	RAD21	8952	675	149	17	11.2349	0.0268756	1
NFYB	ENCFF225MPC	ENCFF096XMD	ARID1B	RAD51	8952	675	2127	213	160.38	1.09981e-05	1
NFYB	ENCFF225MPC	ENCFF975IRM	ARID1B	RB1	8952	675	1520	195	114.611	2.29438e-12	2.48346e-07
NFYB	ENCFF225MPC	ENCFF379MPS	ARID1B	RBBP5	8952	675	894	111	67.4095	2.92572e-07	0.0316683
NFYB	ENCFF225MPC	ENCFF120IDE	ARID1B	RBFOX2	8952	675	2507	241	189.033	3.61589e-05	1
NFYB	ENCFF225MPC	ENCFF682SIY	ARID1B	RBM14	8952	675	97	15	7.31401	0.00467088	1
NFYB	ENCFF225MPC	ENCFF971VJZ	ARID1B	RBM15	8952	675	15	0	1.13103	0.3227	1
NFYB	ENCFF225MPC	ENCFF861YKK	ARID1B	RBM17	8952	675	0	0	0	1	1
NFYB	ENCFF225MPC	ENCFF522JUV	ARID1B	RBM22	8952	675	421	48	31.7443	0.0015837	1
NFYB	ENCFF225MPC	ENCFF680WBN	ARID1B	RBM25	8952	675	3467	203	261.419	2.36405e-05	1
NFYB	ENCFF225MPC	ENCFF782GWS	ARID1B	RBM34	8952	675	121	4	9.12366	0.0314855	1
NFYB	ENCFF225MPC	ENCFF209JJD	ARID1B	RBM39	8952	675	81	24	6.10757	2.6041e-08	0.00281871
NFYB	ENCFF225MPC	ENCFF484CKD	ARID1B	RCOR1	8952	675	331	151	24.9581	1.59929e-65	1.73108e-60
NFYB	ENCFF225MPC	ENCFF580QGA	ARID1B	RELA	8952	675	141	36	10.6317	5.88676e-10	6.37189e-05
NFYB	ENCFF225MPC	ENCFF237UAN_ENCFF010UHD	ARID1B	RFX1	8952	675	750	66	56.5516	0.0231975	1
NFYB	ENCFF225MPC	ENCFF716LRI	ARID1B	RFX5	8952	675	575	63	43.3562	0.00101774	1
NFYB	ENCFF225MPC	ENCFF209HKW	ARID1B	RLF	8952	675	270	89	20.3586	2.6255e-29	2.84187e-24
NFYB	ENCFF225MPC	ENCFF478MPX	ARID1B	SAFB	8952	675	329	36	24.8073	0.00725528	1
NFYB	ENCFF225MPC	ENCFF624NUZ	ARID1B	SAFB2	8952	675	2	0	0.150804	0.860016	1
NFYB	ENCFF225MPC	ENCFF718NUA	ARID1B	SAP30	8952	675	676	61	50.9718	0.020177	1
NFYB	ENCFF225MPC	ENCFF294EHN	ARID1B	SETDB1	8952	675	286	39	21.565	0.000219325	1
NFYB	ENCFF225MPC	ENCFF757ODD	ARID1B	SFPQ	8952	675	10	0	0.754021	0.470471	1
NFYB	ENCFF225MPC	ENCFF191MPD	ARID1B	SIN3A	8952	675	1094	131	82.4899	1.97534e-07	0.0213812
NFYB	ENCFF225MPC	ENCFF280GTU	ARID1B	SIN3B	8952	675	744	81	56.0992	0.000345703	1
NFYB	ENCFF225MPC	ENCFF002CXZ	ARID1B	SIRT6	8952	675	107	48	8.06803	8.45336e-22	9.15e-17
NFYB	ENCFF225MPC	ENCFF033EBX_ENCFF002CMM	ARID1B	SIX5	8952	675	637	35	48.0312	0.00953688	1
NFYB	ENCFF225MPC	ENCFF481WGW	ARID1B	SKIL	8952	675	1358	248	102.396	2.31626e-34	2.50714e-29
NFYB	ENCFF225MPC	ENCFF315YAF	ARID1B	SMAD1	8952	675	815	157	61.4527	1.10437e-24	1.19538e-19
NFYB	ENCFF225MPC	ENCFF011KRN	ARID1B	SMAD2	8952	675	14	5	1.05563	0.00380122	1
NFYB	ENCFF225MPC	ENCFF178MOP	ARID1B	SMAD5	8952	675	2109	219	159.023	1.09822e-06	0.118872
NFYB	ENCFF225MPC	ENCFF995NIE	ARID1B	SMARCA5	8952	675	88	27	6.63539	1.86938e-09	0.000202343
NFYB	ENCFF225MPC	ENCFF944GJH	ARID1B	SMARCB1	8952	675	77	35	5.80597	1.58443e-16	1.715e-11
NFYB	ENCFF225MPC	ENCFF114PTZ	ARID1B	SMARCC2	8952	675	259	187	19.5292	5.2467e-113	5.67909e-108
NFYB	ENCFF225MPC	ENCFF622RBW	ARID1B	SMARCE1	8952	675	489	332	36.8716	4.33443e-191	4.69163e-186
NFYB	ENCFF225MPC	ENCFF041YQC	ARID1B	SMC3	8952	675	438	91	33.0261	5.52094e-17	5.97593e-12
NFYB	ENCFF225MPC	ENCFF494ZUY	ARID1B	SNIP1	8952	675	103	21	7.76642	4.10565e-05	1
NFYB	ENCFF225MPC	ENCFF033KXY	ARID1B	SNRNP70	8952	675	3	0	0.226206	0.797553	1
NFYB	ENCFF225MPC	ENCFF241TBP	ARID1B	SOX6	8952	675	1337	404	100.813	2.58373e-114	2.79665e-109
NFYB	ENCFF225MPC	ENCFF300XUA	ARID1B	SP1	8952	675	2565	174	193.407	0.0110329	1
NFYB	ENCFF225MPC	ENCFF002CMJ	ARID1B	SPI1	8952	675	872	153	65.7507	1.9106e-20	2.06805e-15
NFYB	ENCFF225MPC	ENCFF985TSH	ARID1B	SREBF1	8952	675	462	57	34.8358	0.000144121	1
NFYB	ENCFF225MPC	ENCFF798URE	ARID1B	SRSF1	8952	675	94	8	7.0878	0.131941	1
NFYB	ENCFF225MPC	ENCFF722XRW	ARID1B	SRSF3	8952	675	23	5	1.73425	0.0230782	1
NFYB	ENCFF225MPC	ENCFF059WVE	ARID1B	SRSF7	8952	675	3	0	0.226206	0.797553	1
NFYB	ENCFF225MPC	ENCFF137IBM	ARID1B	SRSF9	8952	675	0	0	0	1	1
NFYB	ENCFF225MPC	ENCFF290HTJ	ARID1B	STAT1_0	8952	675	77	33	5.80597	5.59335e-15	6.05429e-10
NFYB	ENCFF225MPC	ENCFF254MPF	ARID1B	STAT1_1	8952	675	79	31	5.95677	3.33673e-13	3.61171e-08
NFYB	ENCFF225MPC	ENCFF498DOQ	ARID1B	STAT1_2	8952	675	44	19	3.31769	2.34391e-09	0.000253707
NFYB	ENCFF225MPC	ENCFF648NYF	ARID1B	STAT1_3	8952	675	195	66	14.7034	8.47463e-23	9.17303e-18
NFYB	ENCFF225MPC	ENCFF841YFF	ARID1B	STAT2_0	8952	675	112	40	8.44504	3.05344e-15	3.30507e-10
NFYB	ENCFF225MPC	ENCFF714VIT	ARID1B	STAT2_1	8952	675	248	91	18.6997	3.05388e-33	3.30555e-28
NFYB	ENCFF225MPC	ENCFF696KPD	ARID1B	STAT5A	8952	675	409	240	30.8395	2.4149e-125	2.61391e-120
NFYB	ENCFF225MPC	ENCFF484HCG	ARID1B	SUPT5H	8952	675	1504	170	113.405	1.49792e-07	0.0162137
NFYB	ENCFF225MPC	ENCFF822FWM	ARID1B	TAF1	8952	675	2161	264	162.944	8.96886e-14	9.70799e-09
NFYB	ENCFF225MPC	ENCFF617CAZ	ARID1B	TAF15	8952	675	30	4	2.26206	0.113607	1
NFYB	ENCFF225MPC	ENCFF034CQR	ARID1B	TAF7	8952	675	37	9	2.78988	0.00173331	1
NFYB	ENCFF225MPC	ENCFF785HXY	ARID1B	TAF9B	8952	675	1088	261	82.0375	8.49137e-56	9.19114e-51
NFYB	ENCFF225MPC	ENCFF284LRP_ENCFF482CEV	ARID1B	TAL1	8952	675	296	250	22.319	9.25193e-166	1.00144e-160
NFYB	ENCFF225MPC	ENCFF626MVT	ARID1B	TBL1XR1	8952	675	1010	294	76.1562	3.17808e-80	3.43998e-75
NFYB	ENCFF225MPC	ENCFF380FJL	ARID1B	TBP	8952	675	2571	295	193.859	3.17469e-12	3.43631e-07
NFYB	ENCFF225MPC	ENCFF249EZR	ARID1B	TCF7	8952	675	387	99	29.1806	2.51989e-24	2.72755e-19
NFYB	ENCFF225MPC	ENCFF312RFN	ARID1B	TCF7L2	8952	675	222	39	16.7393	1.40078e-06	0.151622
NFYB	ENCFF225MPC	ENCFF619BDC	ARID1B	TEAD2	8952	675	142	45	10.7071	4.04943e-15	4.38314e-10
NFYB	ENCFF225MPC	ENCFF209MQX	ARID1B	TEAD4	8952	675	1125	416	84.8274	7.01369e-146	7.59168e-141
NFYB	ENCFF225MPC	ENCFF701MXF	ARID1B	TFDP1	8952	675	1406	158	106.015	4.99409e-07	0.0540565
NFYB	ENCFF225MPC	ENCFF641LJY	ARID1B	THAP1	8952	675	728	60	54.8928	0.040842	1
NFYB	ENCFF225MPC	ENCFF671BFH	ARID1B	THRA	8952	675	30	11	2.26206	2.07013e-05	1
NFYB	ENCFF225MPC	ENCFF294VWT	ARID1B	THRAP3	8952	675	24	12	1.80965	4.21581e-07	0.0456323
NFYB	ENCFF225MPC	ENCFF262BVP	ARID1B	TOE1	8952	675	1364	252	102.849	1.24941e-35	1.35238e-30
NFYB	ENCFF225MPC	ENCFF049CRW_ENCFF646VQW	ARID1B	TRIM24	8952	675	277	185	20.8864	3.0813e-106	3.33523e-101
NFYB	ENCFF225MPC	ENCFF561IZB	ARID1B	TRIP13	8952	675	251	10	18.9259	0.00980349	1
NFYB	ENCFF225MPC	ENCFF036YVI	ARID1B	TSC22D4	8952	675	8	2	0.603217	0.0995276	1
NFYB	ENCFF225MPC	ENCFF730URE	ARID1B	U2AF1	8952	675	234	16	17.6441	0.0916721	1
NFYB	ENCFF225MPC	ENCFF398EQF	ARID1B	U2AF2	8952	675	0	0	0	1	1
NFYB	ENCFF225MPC	ENCFF671DOL	ARID1B	UBTF	8952	675	903	136	68.0881	1.45897e-13	1.57921e-08
NFYB	ENCFF225MPC	ENCFF334FMW	ARID1B	USF1	8952	675	2749	217	207.28	0.0216301	1
NFYB	ENCFF225MPC	ENCFF150VTD	ARID1B	USF2	8952	675	1020	76	76.9102	0.0454652	1
NFYB	ENCFF225MPC	ENCFF186QUP	ARID1B	VEZF1	8952	675	2580	360	194.538	9.00368e-27	9.74567e-22
NFYB	ENCFF225MPC	ENCFF803LEC	ARID1B	XRCC3	8952	675	7	2	0.527815	0.0821687	1
NFYB	ENCFF225MPC	ENCFF998KKJ	ARID1B	XRCC5	8952	675	805	130	60.6987	4.38057e-15	4.74157e-10
NFYB	ENCFF225MPC	ENCFF706LIT	ARID1B	YBX1	8952	675	3	1	0.226206	0.180412	1
NFYB	ENCFF225MPC	ENCFF246HIU	ARID1B	YBX3	8952	675	165	16	12.4414	0.0622374	1
NFYB	ENCFF225MPC	ENCFF926FUM_ENCFF328XKC	ARID1B	YY1	8952	675	1295	136	97.6458	4.19258e-05	1
NFYB	ENCFF225MPC	ENCFF253FON	ARID1B	ZBED1	8952	675	411	96	30.9903	5.03931e-21	5.4546e-16
NFYB	ENCFF225MPC	ENCFF434QZL	ARID1B	ZBTB11	8952	675	532	69	40.1139	9.39307e-06	1
NFYB	ENCFF225MPC	ENCFF561USY	ARID1B	ZBTB2	8952	675	733	172	55.2698	2.37256e-36	2.56808e-31
NFYB	ENCFF225MPC	ENCFF408FQC	ARID1B	ZBTB33	8952	675	476	44	35.8914	0.025559	1
NFYB	ENCFF225MPC	ENCFF417LEJ	ARID1B	ZBTB40	8952	675	1286	147	96.9672	4.83248e-07	0.0523073
NFYB	ENCFF225MPC	ENCFF706ISJ	ARID1B	ZBTB7A	8952	675	1354	176	102.095	8.88963e-12	9.62222e-07
NFYB	ENCFF225MPC	ENCFF589EVD	ARID1B	ZBTB8A	8952	675	14	2	1.05563	0.193883	1
NFYB	ENCFF225MPC	ENCFF522JRK	ARID1B	ZC3H11A	8952	675	160	37	12.0643	4.33932e-09	0.000469692
NFYB	ENCFF225MPC	ENCFF809OEX	ARID1B	ZC3H8	8952	675	273	109	20.5848	1.19445e-42	1.29288e-37
NFYB	ENCFF225MPC	ENCFF521CRG	ARID1B	ZFP36	8952	675	420	122	31.6689	2.13332e-34	2.30913e-29
NFYB	ENCFF225MPC	ENCFF396DNK	ARID1B	ZFP91	8952	675	377	67	28.4266	3.10535e-10	3.36126e-05
NFYB	ENCFF225MPC	ENCFF433RKB	ARID1B	ZFX	8952	675	920	121	69.37	5.57929e-09	0.000603908
NFYB	ENCFF225MPC	ENCFF195ODE	ARID1B	ZHX1	8952	675	290	56	21.8666	4.77918e-10	5.17303e-05
NFYB	ENCFF225MPC	ENCFF163VUK	ARID1B	ZKSCAN1	8952	675	665	148	50.1424	2.7938e-29	3.02404e-24
NFYB	ENCFF225MPC	ENCFF529FWJ	ARID1B	ZKSCAN8	8952	675	176	65	13.2708	2.03474e-24	2.20242e-19
NFYB	ENCFF225MPC	ENCFF597DIY	ARID1B	ZMIZ1	8952	675	73	8	5.50436	0.0850394	1
NFYB	ENCFF225MPC	ENCFF511QHY	ARID1B	ZMYM3	8952	675	80	28	6.03217	5.61544e-11	6.07821e-06
NFYB	ENCFF225MPC	ENCFF114IWY	ARID1B	ZNF143	8952	675	1419	165	106.996	4.40023e-08	0.00476286
NFYB	ENCFF225MPC	ENCFF116DIO	ARID1B	ZNF148	8952	675	844	156	63.6394	7.40716e-23	8.01758e-18
NFYB	ENCFF225MPC	ENCFF721LDD	ARID1B	ZNF175	8952	675	526	156	39.6615	1.76794e-44	1.91364e-39
NFYB	ENCFF225MPC	ENCFF853TZC	ARID1B	ZNF197	8952	675	375	86	28.2758	1.43668e-18	1.55508e-13
NFYB	ENCFF225MPC	ENCFF891MVM	ARID1B	ZNF263	8952	675	94	18	7.0878	0.000265873	1
NFYB	ENCFF225MPC	ENCFF344QKL	ARID1B	ZNF274	8952	675	56	33	4.22252	7.43642e-19	8.04926e-14
NFYB	ENCFF225MPC	ENCFF386WKY	ARID1B	ZNF280A	8952	675	31	2	2.33747	0.263823	1
NFYB	ENCFF225MPC	ENCFF581ZZT	ARID1B	ZNF282	8952	675	554	144	41.7728	3.33159e-35	3.60615e-30
NFYB	ENCFF225MPC	ENCFF921WMN	ARID1B	ZNF318	8952	675	328	168	24.7319	8.39251e-80	9.08413e-75
NFYB	ENCFF225MPC	ENCFF744SVC	ARID1B	ZNF354B	8952	675	134	13	10.1039	0.0751636	1
NFYB	ENCFF225MPC	ENCFF706SJZ	ARID1B	ZNF384	8952	675	618	118	46.5985	9.11525e-19	9.86644e-14
NFYB	ENCFF225MPC	ENCFF388YOB	ARID1B	ZNF395	8952	675	1005	202	75.7792	1.79121e-33	1.93882e-28
NFYB	ENCFF225MPC	ENCFF834WGJ	ARID1B	ZNF507	8952	675	2	0	0.150804	0.860016	1
NFYB	ENCFF225MPC	ENCFF447QUG	ARID1B	ZNF512	8952	675	27	4	2.03586	0.0934581	1
NFYB	ENCFF225MPC	ENCFF815TTY	ARID1B	ZNF584	8952	675	348	114	26.2399	9.12998e-37	9.88238e-32
NFYB	ENCFF225MPC	ENCFF602AXP	ARID1B	ZNF589	8952	675	618	180	46.5985	5.84168e-50	6.32309e-45
NFYB	ENCFF225MPC	ENCFF273TYA	ARID1B	ZNF592	8952	675	654	220	49.313	4.74771e-71	5.13897e-66
NFYB	ENCFF225MPC	ENCFF173NRW	ARID1B	ZNF644	8952	675	389	111	29.3314	7.74954e-31	8.38817e-26
NFYB	ENCFF225MPC	ENCFF248AOD	ARID1B	ZNF766	8952	675	817	203	61.6036	5.28389e-46	5.71933e-41
NFYB	ENCFF225MPC	ENCFF654BMD	ARID1B	ZNF83	8952	675	418	98	31.5181	1.57172e-21	1.70124e-16
NFYB	ENCFF225MPC	ENCFF996IVU	ARID1B	ZNF830	8952	675	80	22	6.03217	3.16166e-07	0.0342222
NFYB	ENCFF225MPC	ENCFF253NXR	ARID1B	ZSCAN29	8952	675	356	101	26.8432	4.78675e-28	5.18122e-23
NFYB	ENCFF225MPC	ENCFF588OLK	ARID1B	ZZZ3	8952	675	153	34	11.5365	4.26716e-08	0.00461882
NFYB	ENCFF332ICQ	ENCFF836VRV	ARID2	37104	8952	79	401	5	3.53876	0.134342	1
NFYB	ENCFF332ICQ	ENCFF396GUH	ARID2	ADNP	8952	79	127	6	1.12076	0.000897417	1
NFYB	ENCFF332ICQ	ENCFF360BTO	ARID2	AFF1	8952	79	543	15	4.79189	0.000102332	1
NFYB	ENCFF332ICQ	ENCFF010MMQ	ARID2	ARHGAP35	8952	79	85	2	0.750112	0.132878	1
NFYB	ENCFF332ICQ	ENCFF225MPC	ARID2	ARID1B	8952	79	675	19	5.95677	1.1301e-05	1
NFYB	ENCFF332ICQ	ENCFF332ICQ	ARID2	ARID2	8952	79	79	79	0.697163	2.33875e-130	2.53148e-125
NFYB	ENCFF332ICQ	ENCFF835KAT	ARID2	ARID3A	8952	79	570	20	5.03016	2.89029e-07	0.0312848
NFYB	ENCFF332ICQ	ENCFF235ZZP	ARID2	ASH1L	8952	79	2325	16	20.5178	0.0579041	1
NFYB	ENCFF332ICQ	ENCFF002CVM	ARID2	ATF1	8952	79	1593	16	14.058	0.0872657	1
NFYB	ENCFF332ICQ	ENCFF968KBN	ARID2	ATF2	8952	79	826	16	7.28932	0.0020733	1
NFYB	ENCFF332ICQ	ENCFF958KNK	ARID2	ATF3	8952	79	1033	9	9.11606	0.131658	1
NFYB	ENCFF332ICQ	ENCFF710IEF	ARID2	ATF4	8952	79	426	10	3.75938	0.00362013	1
NFYB	ENCFF332ICQ	ENCFF868QLL	ARID2	ATF7	8952	79	2939	46	25.9362	0.000108437	1
NFYB	ENCFF332ICQ	ENCFF423EMU	ARID2	BACH1	8952	79	116	2	1.02368	0.188244	1
NFYB	ENCFF332ICQ	ENCFF057ZUY	ARID2	BCOR	8952	79	382	22	3.37109	1.24777e-11	1.3506e-06
NFYB	ENCFF332ICQ	ENCFF002CVP	ARID2	BDP1	8952	79	13	0	0.114723	0.891613	1
NFYB	ENCFF332ICQ	ENCFF179NDS	ARID2	BHLHE40	8952	79	1665	34	14.6934	6.77191e-06	0.732998
NFYB	ENCFF332ICQ	ENCFF048OIZ	ARID2	BMI1	8952	79	278	7	2.45331	0.00912798	1
NFYB	ENCFF332ICQ	ENCFF549GMO	ARID2	BRCA1	8952	79	1	0	0.00882484	0.991214	1
NFYB	ENCFF332ICQ	ENCFF714XHL	ARID2	BRD4	8952	79	160	4	1.41197	0.0403537	1
NFYB	ENCFF332ICQ	ENCFF666LZV	ARID2	BRD9	8952	79	305	28	2.69158	2.43845e-19	2.6394e-14
NFYB	ENCFF332ICQ	ENCFF002CVR	ARID2	BRF1	8952	79	10	0	0.0882484	0.915533	1
NFYB	ENCFF332ICQ	ENCFF002CVS	ARID2	BRF2	8952	79	7	1	0.0617739	0.0580734	1
NFYB	ENCFF332ICQ	ENCFF996ZGL	ARID2	C11orf30	8952	79	1723	17	15.2052	0.0869488	1
NFYB	ENCFF332ICQ	ENCFF642BNC	ARID2	CBFA2T2	8952	79	1271	13	11.2164	0.0960711	1
NFYB	ENCFF332ICQ	ENCFF993GXU	ARID2	CBFA2T3	8952	79	635	18	5.60378	1.70853e-05	1
NFYB	ENCFF332ICQ	ENCFF484DKT	ARID2	CBX1	8952	79	963	19	8.49832	0.000761137	1
NFYB	ENCFF332ICQ	ENCFF455TDM	ARID2	CBX3	8952	79	1458	37	12.8666	2.10644e-08	0.00228003
NFYB	ENCFF332ICQ	ENCFF062ARS	ARID2	CBX5	8952	79	211	9	1.86204	0.000115204	1
NFYB	ENCFF332ICQ	ENCFF456PQY	ARID2	CBX8	8952	79	3	0	0.0264745	0.973873	1
NFYB	ENCFF332ICQ	ENCFF874QUM	ARID2	CC2D1A	8952	79	1405	52	12.3989	3.66868e-17	3.97101e-12
NFYB	ENCFF332ICQ	ENCFF583GKE	ARID2	CCAR2	8952	79	26	3	0.229446	0.00160045	1
NFYB	ENCFF332ICQ	ENCFF002CVU	ARID2	CCNT2	8952	79	1787	29	15.77	0.00087449	1
NFYB	ENCFF332ICQ	ENCFF643TEZ	ARID2	CDC5L	8952	79	74	9	0.653038	3.09795e-08	0.00335325
NFYB	ENCFF332ICQ	ENCFF813LOW_ENCFF429XKT	ARID2	CEBPB	8952	79	594	13	5.24196	0.00191682	1
NFYB	ENCFF332ICQ	ENCFF925MHB	ARID2	CEBPZ	8952	79	593	2	5.23313	0.0730757	1
NFYB	ENCFF332ICQ	ENCFF859FVX	ARID2	CHAMP1	8952	79	684	12	6.03619	0.0116771	1
NFYB	ENCFF332ICQ	ENCFF684MLP	ARID2	COPS2	8952	79	11	0	0.0970733	0.90749	1
NFYB	ENCFF332ICQ	ENCFF665FHC	ARID2	CREB3	8952	79	330	4	2.9122	0.1629	1
NFYB	ENCFF332ICQ	ENCFF582YPB	ARID2	CREB3L1	8952	79	1553	21	13.705	0.0163722	1
NFYB	ENCFF332ICQ	ENCFF948TXN	ARID2	CREM	8952	79	3223	55	28.4425	3.25173e-06	0.35197
NFYB	ENCFF332ICQ	ENCFF117EWO	ARID2	CSDE1	8952	79	467	2	4.1212	0.137785	1
NFYB	ENCFF332ICQ	ENCFF152VMJ	ARID2	CTBP1	8952	79	2152	60	18.9911	3.50807e-14	3.79717e-09
NFYB	ENCFF332ICQ	ENCFF002DDJ_ENCFF002DBD	ARID2	CTCF	8952	79	445	58	3.92706	2.39452e-46	2.59185e-41
NFYB	ENCFF332ICQ	ENCFF962FQM	ARID2	CTCFL	8952	79	434	32	3.82998	3.79126e-19	4.1037e-14
NFYB	ENCFF332ICQ	ENCFF517YCC	ARID2	CUX1	8952	79	205	7	1.80909	0.00206118	1
NFYB	ENCFF332ICQ	ENCFF526HLP	ARID2	DACH1	8952	79	492	17	4.34182	2.53354e-06	0.274233
NFYB	ENCFF332ICQ	ENCFF338HQY	ARID2	DDX20	8952	79	2080	23	18.3557	0.0481344	1
NFYB	ENCFF332ICQ	ENCFF786WZD	ARID2	DEAF1	8952	79	775	4	6.83925	0.0976278	1
NFYB	ENCFF332ICQ	ENCFF408SNO	ARID2	DIDO1	8952	79	566	7	4.99486	0.10423	1
NFYB	ENCFF332ICQ	ENCFF034PQD	ARID2	DNMT1	8952	79	43	3	0.379468	0.00623124	1
NFYB	ENCFF332ICQ	ENCFF774QKS_ENCFF823SYE	ARID2	DPF2	8952	79	347	12	3.06222	6.64042e-05	1
NFYB	ENCFF332ICQ	ENCFF106DAY	ARID2	E2F1	8952	79	2426	25	21.4091	0.0597666	1
NFYB	ENCFF332ICQ	ENCFF225TLP	ARID2	E2F4	8952	79	1863	22	16.4407	0.0362554	1
NFYB	ENCFF332ICQ	ENCFF356ASJ	ARID2	E2F5	8952	79	1026	14	9.05429	0.0333676	1
NFYB	ENCFF332ICQ	ENCFF417DTI_ENCFF917COW	ARID2	E2F6	8952	79	1561	18	13.7756	0.0518775	1
NFYB	ENCFF332ICQ	ENCFF310AGG	ARID2	E2F7	8952	79	371	4	3.27402	0.181228	1
NFYB	ENCFF332ICQ	ENCFF925DJG	ARID2	E2F8	8952	79	1153	35	10.175	6.76976e-10	7.32765e-05
NFYB	ENCFF332ICQ	ENCFF083YCQ	ARID2	E4F1	8952	79	2631	36	23.2182	0.00327905	1
NFYB	ENCFF332ICQ	ENCFF806BDC	ARID2	EHMT2	8952	79	463	15	4.0859	1.89817e-05	1
NFYB	ENCFF332ICQ	ENCFF502KHR	ARID2	ELF4	8952	79	1900	25	16.7672	0.013771	1
NFYB	ENCFF332ICQ	ENCFF019PEL	ARID2	ELK1	8952	79	476	9	4.20063	0.0168172	1
NFYB	ENCFF332ICQ	ENCFF549TYR	ARID2	EP300	8952	79	1149	28	10.1397	1.90977e-06	0.206715
NFYB	ENCFF332ICQ	ENCFF925ANU	ARID2	EP400	8952	79	1839	33	16.2289	8.96864e-05	1
NFYB	ENCFF332ICQ	ENCFF213EPU	ARID2	ESRRA	8952	79	1586	43	13.9962	2.62312e-10	2.83929e-05
NFYB	ENCFF332ICQ	ENCFF076YZO	ARID2	ETS1	8952	79	976	18	8.61305	0.00193145	1
NFYB	ENCFF332ICQ	ENCFF772HOY	ARID2	ETS2	8952	79	22	0	0.194147	0.823537	1
NFYB	ENCFF332ICQ	ENCFF404YMX	ARID2	ETV1	8952	79	948	22	8.36595	4.08587e-05	1
NFYB	ENCFF332ICQ	ENCFF545VNY	ARID2	ETV6	8952	79	250	6	2.20621	0.0176362	1
NFYB	ENCFF332ICQ	ENCFF820EVZ	ARID2	EWSR1	8952	79	10	0	0.0882484	0.915533	1
NFYB	ENCFF332ICQ	ENCFF883WYX	ARID2	FIP1L1	8952	79	674	12	5.94794	0.0106882	1
NFYB	ENCFF332ICQ	ENCFF002CVW	ARID2	FOS	8952	79	3625	17	31.9901	0.00138383	1
NFYB	ENCFF332ICQ	ENCFF473GCH	ARID2	FOSL1	8952	79	202	5	1.78262	0.0252307	1
NFYB	ENCFF332ICQ	ENCFF809YFY	ARID2	FOXA1	8952	79	17	0	0.150022	0.860689	1
NFYB	ENCFF332ICQ	ENCFF452SPE	ARID2	FOXJ2	8952	79	719	13	6.34506	0.00761659	1
NFYB	ENCFF332ICQ	ENCFF699ZII	ARID2	FOXM1	8952	79	1366	22	12.0547	0.0031579	1
NFYB	ENCFF332ICQ	ENCFF142CPK	ARID2	FUS	8952	79	197	4	1.73849	0.0669057	1
NFYB	ENCFF332ICQ	ENCFF833FCO	ARID2	GABPA	8952	79	1778	19	15.6906	0.0657224	1
NFYB	ENCFF332ICQ	ENCFF517KRT	ARID2	GABPB1	8952	79	2338	30	20.6325	0.0112801	1
NFYB	ENCFF332ICQ	ENCFF632NQI	ARID2	GATA1	8952	79	472	11	4.16533	0.00254686	1
NFYB	ENCFF332ICQ	ENCFF732HOE	ARID2	GATA2	8952	79	327	8	2.88572	0.00665677	1
NFYB	ENCFF332ICQ	ENCFF253FZN	ARID2	GATAD2A	8952	79	324	17	2.85925	9.19305e-09	0.000995065
NFYB	ENCFF332ICQ	ENCFF549KOD	ARID2	GATAD2B	8952	79	474	12	4.18298	0.000913785	1
NFYB	ENCFF332ICQ	ENCFF126BCK	ARID2	GMEB1	8952	79	1653	27	14.5875	0.00113558	1
NFYB	ENCFF332ICQ	ENCFF167HYX	ARID2	GTF2A2	8952	79	175	1	1.54435	0.329643	1
NFYB	ENCFF332ICQ	ENCFF002CWR	ARID2	GTF2B	8952	79	606	9	5.34786	0.0469148	1
NFYB	ENCFF332ICQ	ENCFF778RMG	ARID2	GTF2E2	8952	79	780	10	6.88338	0.067428	1
NFYB	ENCFF332ICQ	ENCFF002CYL	ARID2	GTF3C2	8952	79	36	5	0.317694	1.96288e-05	1
NFYB	ENCFF332ICQ	ENCFF474NLG	ARID2	HCFC1	8952	79	1895	36	16.7231	1.60734e-05	1
NFYB	ENCFF332ICQ	ENCFF580DYE	ARID2	HDAC3	8952	79	261	10	2.30328	0.00011572	1
NFYB	ENCFF332ICQ	ENCFF998HOR	ARID2	HDAC6	8952	79	85	2	0.750112	0.132878	1
NFYB	ENCFF332ICQ	ENCFF939ZFS	ARID2	HDAC8	8952	79	232	7	2.04736	0.00386167	1
NFYB	ENCFF332ICQ	ENCFF676NPW	ARID2	HES1	8952	79	504	14	4.44772	0.000159183	1
NFYB	ENCFF332ICQ	ENCFF265LKN	ARID2	HINFP	8952	79	226	6	1.99441	0.0118959	1
NFYB	ENCFF332ICQ	ENCFF396NSO	ARID2	HLTF	8952	79	195	13	1.72084	3.33432e-08	0.0036091
NFYB	ENCFF332ICQ	ENCFF558DSF	ARID2	HMBOX1	8952	79	512	16	4.51832	1.57301e-05	1
NFYB	ENCFF332ICQ	ENCFF002CWT	ARID2	HMGN3	8952	79	1513	27	13.352	0.000358148	1
NFYB	ENCFF332ICQ	ENCFF292JRY	ARID2	HNRNPH1	8952	79	15	1	0.132373	0.11596	1
NFYB	ENCFF332ICQ	ENCFF777CWV	ARID2	HNRNPK	8952	79	381	6	3.36227	0.0695418	1
NFYB	ENCFF332ICQ	ENCFF010STZ	ARID2	HNRNPL	8952	79	398	8	3.51229	0.017133	1
NFYB	ENCFF332ICQ	ENCFF122QSN	ARID2	HNRNPLL	8952	79	1631	16	14.3933	0.0909948	1
NFYB	ENCFF332ICQ	ENCFF768TJI	ARID2	HNRNPUL1	8952	79	26	0	0.229446	0.794974	1
NFYB	ENCFF332ICQ	ENCFF835YLR	ARID2	ID3	8952	79	578	17	5.10076	1.83439e-05	1
NFYB	ENCFF332ICQ	ENCFF415YPX	ARID2	ILF3	8952	79	112	5	0.988382	0.00292546	1
NFYB	ENCFF332ICQ	ENCFF176NOI	ARID2	ILK	8952	79	11	0	0.0970733	0.90749	1
NFYB	ENCFF332ICQ	ENCFF388AJH	ARID2	IRF1	8952	79	182	2	1.60612	0.25882	1
NFYB	ENCFF332ICQ	ENCFF284VUQ	ARID2	IRF1_0	8952	79	3230	36	28.5042	0.0267283	1
NFYB	ENCFF332ICQ	ENCFF909LKK	ARID2	IRF1_1	8952	79	1104	15	9.74263	0.0303719	1
NFYB	ENCFF332ICQ	ENCFF908UIY	ARID2	IRF1_2	8952	79	1228	15	10.8369	0.0501963	1
NFYB	ENCFF332ICQ	ENCFF730RUF	ARID2	IRF1_3	8952	79	70	0	0.617739	0.539162	1
NFYB	ENCFF332ICQ	ENCFF384YDT	ARID2	IRF2	8952	79	787	11	6.94515	0.0437625	1
NFYB	ENCFF332ICQ	ENCFF196DHR	ARID2	IRF9	8952	79	162	4	1.42962	0.0416676	1
NFYB	ENCFF332ICQ	ENCFF629BFI	ARID2	JUN	8952	79	1372	32	12.1077	9.53857e-07	0.103246
NFYB	ENCFF332ICQ	ENCFF417QAJ	ARID2	JUN_0	8952	79	290	3	2.5592	0.21613	1
NFYB	ENCFF332ICQ	ENCFF573GQX	ARID2	JUN_1	8952	79	193	2	1.70319	0.264126	1
NFYB	ENCFF332ICQ	ENCFF192BTP	ARID2	JUN_2	8952	79	185	0	1.6326	0.195422	1
NFYB	ENCFF332ICQ	ENCFF077UYM	ARID2	JUN_3	8952	79	495	12	4.3683	0.00127727	1
NFYB	ENCFF332ICQ	ENCFF426DUB	ARID2	JUNB	8952	79	204	4	1.80027	0.0723254	1
NFYB	ENCFF332ICQ	ENCFF337DKJ	ARID2	JUND	8952	79	2322	55	20.4913	1.35948e-10	1.47152e-05
NFYB	ENCFF332ICQ	ENCFF772QPO	ARID2	KAT8	8952	79	66	0	0.58244	0.558534	1
NFYB	ENCFF332ICQ	ENCFF838COI_ENCFF738WCE	ARID2	KDM1A	8952	79	357	15	3.15047	9.79259e-07	0.105996
NFYB	ENCFF332ICQ	ENCFF042RAK	ARID2	KDM4B	8952	79	695	11	6.13327	0.0251079	1
NFYB	ENCFF332ICQ	ENCFF368TYM	ARID2	KDM5B	8952	79	1661	21	14.6581	0.0259029	1
NFYB	ENCFF332ICQ	ENCFF962VSZ	ARID2	KHSRP	8952	79	308	6	2.71805	0.036964	1
NFYB	ENCFF332ICQ	ENCFF717TWA	ARID2	KLF1	8952	79	712	18	6.28329	6.7956e-05	1
NFYB	ENCFF332ICQ	ENCFF802XZN	ARID2	KLF13	8952	79	655	15	5.78027	0.000634431	1
NFYB	ENCFF332ICQ	ENCFF844HBQ	ARID2	KLF16	8952	79	524	35	4.62422	1.79405e-19	1.9419e-14
NFYB	ENCFF332ICQ	ENCFF314ULQ	ARID2	L3MBTL2	8952	79	2628	45	23.1917	1.9504e-05	1
NFYB	ENCFF332ICQ	ENCFF511OXK	ARID2	LARP7	8952	79	85	10	0.750112	7.34052e-09	0.000794546
NFYB	ENCFF332ICQ	ENCFF659WAF	ARID2	LEF1	8952	79	684	20	6.03619	4.05184e-06	0.438575
NFYB	ENCFF332ICQ	ENCFF308IXJ	ARID2	MAFF	8952	79	384	9	3.38874	0.00548113	1
NFYB	ENCFF332ICQ	ENCFF927JBT	ARID2	MAFG	8952	79	569	7	5.02134	0.105333	1
NFYB	ENCFF332ICQ	ENCFF812QPN	ARID2	MAFK	8952	79	603	19	5.32138	2.5022e-06	0.27084
NFYB	ENCFF332ICQ	ENCFF799HIG_ENCFF422NGZ	ARID2	MAX	8952	79	2485	49	21.9297	2.52679e-07	0.0273502
NFYB	ENCFF332ICQ	ENCFF470MLY	ARID2	MBD2	8952	79	2937	29	25.9186	0.0619283	1
NFYB	ENCFF332ICQ	ENCFF226CZE	ARID2	MCM2	8952	79	10	2	0.0882484	0.00356499	1
NFYB	ENCFF332ICQ	ENCFF679ITJ	ARID2	MCM3	8952	79	7	0	0.0617739	0.940095	1
NFYB	ENCFF332ICQ	ENCFF920RYJ	ARID2	MCM5	8952	79	1	0	0.00882484	0.991214	1
NFYB	ENCFF332ICQ	ENCFF577UJR	ARID2	MEF2A	8952	79	40	0	0.352994	0.702582	1
NFYB	ENCFF332ICQ	ENCFF257RYT	ARID2	MEF2D	8952	79	295	10	2.60333	0.000291686	1
NFYB	ENCFF332ICQ	ENCFF613RNG	ARID2	MEIS2	8952	79	2014	27	17.7732	0.00972511	1
NFYB	ENCFF332ICQ	ENCFF670ZCR	ARID2	MGA	8952	79	1391	22	12.2754	0.00377455	1
NFYB	ENCFF332ICQ	ENCFF365NKO	ARID2	MIER1	8952	79	112	4	0.988382	0.0147993	1
NFYB	ENCFF332ICQ	ENCFF497XOD	ARID2	MITF	8952	79	1452	15	12.8137	0.0858415	1
NFYB	ENCFF332ICQ	ENCFF973OME_ENCFF059ONJ	ARID2	MNT	8952	79	1653	22	14.5875	0.0166546	1
NFYB	ENCFF332ICQ	ENCFF769GYG	ARID2	MTA1	8952	79	635	20	5.60378	1.41189e-06	0.152825
NFYB	ENCFF332ICQ	ENCFF350YXB	ARID2	MTA3	8952	79	2033	39	17.9409	6.29085e-06	0.680928
NFYB	ENCFF332ICQ	ENCFF970LCB	ARID2	MXI1	8952	79	1084	17	9.56613	0.00926682	1
NFYB	ENCFF332ICQ	ENCFF877ANE	ARID2	MYBL2	8952	79	512	3	4.51832	0.167687	1
NFYB	ENCFF332ICQ	ENCFF465JKF	ARID2	MYC	8952	79	2224	46	19.6265	1.60877e-07	0.0174135
NFYB	ENCFF332ICQ	ENCFF099SDW	ARID2	MYC_0	8952	79	1616	32	14.2609	2.08509e-05	1
NFYB	ENCFF332ICQ	ENCFF634AYU	ARID2	MYC_1	8952	79	778	15	6.86573	0.00283173	1
NFYB	ENCFF332ICQ	ENCFF676YJE	ARID2	MYC_2	8952	79	2518	50	22.221	1.60186e-07	0.0173387
NFYB	ENCFF332ICQ	ENCFF387LTN	ARID2	MYC_3	8952	79	1137	21	10.0338	0.000922208	1
NFYB	ENCFF332ICQ	ENCFF583DZD	ARID2	MYNN	8952	79	659	28	5.81557	2.50482e-11	2.71124e-06
NFYB	ENCFF332ICQ	ENCFF074EZL	ARID2	NBN	8952	79	791	30	6.98045	7.26563e-11	7.86439e-06
NFYB	ENCFF332ICQ	ENCFF495CSO	ARID2	NCOA4	8952	79	30	5	0.264745	8.31731e-06	0.900274
NFYB	ENCFF332ICQ	ENCFF322DSX	ARID2	NCOA6	8952	79	148	0	1.30608	0.270881	1
NFYB	ENCFF332ICQ	ENCFF165BCW_ENCFF366UBB	ARID2	NCOR1	8952	79	450	10	3.97118	0.00506723	1
NFYB	ENCFF332ICQ	ENCFF002CXG	ARID2	NELFE	8952	79	74	1	0.653038	0.339882	1
NFYB	ENCFF332ICQ	ENCFF581YKY	ARID2	NEUROD1	8952	79	2218	27	19.5735	0.0217472	1
NFYB	ENCFF332ICQ	ENCFF495MHZ	ARID2	NFE2	8952	79	669	21	5.90382	8.34556e-07	0.0903331
NFYB	ENCFF332ICQ	ENCFF175IUO	ARID2	NFE2L1	8952	79	58	3	0.511841	0.0133957	1
NFYB	ENCFF332ICQ	ENCFF370ENX	ARID2	NFIC	8952	79	926	18	8.17181	0.00116523	1
NFYB	ENCFF332ICQ	ENCFF157UUF	ARID2	NFRKB	8952	79	698	7	6.15974	0.141047	1
NFYB	ENCFF332ICQ	ENCFF986MHU	ARID2	NFXL1	8952	79	52	2	0.458892	0.0665421	1
NFYB	ENCFF332ICQ	ENCFF012VES	ARID2	NFYA	8952	79	3615	19	31.9018	0.00429157	1
NFYB	ENCFF332ICQ	ENCFF113PMT	ARID2	NFYB	8952	79	8952	79	79	0.0448372	1
NFYB	ENCFF332ICQ	ENCFF906PGD	ARID2	NKRF	8952	79	538	16	4.74777	2.76236e-05	1
NFYB	ENCFF332ICQ	ENCFF776YPS	ARID2	NONO	8952	79	511	15	4.5095	5.45721e-05	1
NFYB	ENCFF332ICQ	ENCFF954NAJ	ARID2	NR0B1	8952	79	0	0	0	1	1
NFYB	ENCFF332ICQ	ENCFF664ZGR	ARID2	NR2C1	8952	79	907	15	8.00413	0.00905866	1
NFYB	ENCFF332ICQ	ENCFF594LCH	ARID2	NR2C2	8952	79	79	0	0.697163	0.497996	1
NFYB	ENCFF332ICQ	ENCFF175IIE	ARID2	NR2F1	8952	79	868	23	7.65996	3.96315e-06	0.428975
NFYB	ENCFF332ICQ	ENCFF255EOB	ARID2	NR2F2	8952	79	769	20	6.7863	1.99199e-05	1
NFYB	ENCFF332ICQ	ENCFF712AXK	ARID2	NR2F6	8952	79	484	16	4.27122	8.18935e-06	0.886423
NFYB	ENCFF332ICQ	ENCFF859NPS	ARID2	NR4A1	8952	79	419	7	3.69761	0.0464692	1
NFYB	ENCFF332ICQ	ENCFF144PPR_ENCFF493ABN	ARID2	NRF1	8952	79	1920	18	16.9437	0.0906259	1
NFYB	ENCFF332ICQ	ENCFF289BUU	ARID2	NUFIP1	8952	79	102	6	0.900134	0.000300322	1
NFYB	ENCFF332ICQ	ENCFF168HAG	ARID2	PBX2	8952	79	1779	21	15.6994	0.03864	1
NFYB	ENCFF332ICQ	ENCFF941RVL	ARID2	PCBP1	8952	79	622	13	5.48905	0.00272471	1
NFYB	ENCFF332ICQ	ENCFF881XQF	ARID2	PCBP2	8952	79	37	2	0.326519	0.0384576	1
NFYB	ENCFF332ICQ	ENCFF462FRU	ARID2	PHB2	8952	79	94	5	0.829535	0.00142801	1
NFYB	ENCFF332ICQ	ENCFF948YVM	ARID2	PHF20	8952	79	727	17	6.41566	0.00024308	1
NFYB	ENCFF332ICQ	ENCFF134CUM	ARID2	PHF21A	8952	79	549	24	4.84484	3.54742e-10	3.83976e-05
NFYB	ENCFF332ICQ	ENCFF626KTJ	ARID2	PHF8	8952	79	1055	16	9.31021	0.0137835	1
NFYB	ENCFF332ICQ	ENCFF544XKC	ARID2	PKNOX1	8952	79	3439	35	30.3486	0.0479064	1
NFYB	ENCFF332ICQ	ENCFF881QBT	ARID2	PML	8952	79	1497	17	13.2108	0.0585259	1
NFYB	ENCFF332ICQ	ENCFF662YQK	ARID2	POLR2A_0	8952	79	2114	20	18.6557	0.0847304	1
NFYB	ENCFF332ICQ	ENCFF853ZMA	ARID2	POLR2A_1	8952	79	2334	24	20.5972	0.0621498	1
NFYB	ENCFF332ICQ	ENCFF206YXX	ARID2	POLR2A_2	8952	79	2119	16	18.6998	0.0808256	1
NFYB	ENCFF332ICQ	ENCFF270QAB	ARID2	POLR2A_3	8952	79	2363	26	20.8531	0.0432944	1
NFYB	ENCFF332ICQ	ENCFF296CNQ	ARID2	POLR2AphosphoS2	8952	79	671	9	5.92147	0.0661365	1
NFYB	ENCFF332ICQ	ENCFF542DOG	ARID2	POLR2AphosphoS5	8952	79	2039	21	17.9939	0.0683334	1
NFYB	ENCFF332ICQ	ENCFF872JJJ	ARID2	POLR2B	8952	79	1396	18	12.3195	0.0297879	1
NFYB	ENCFF332ICQ	ENCFF273EYJ	ARID2	POLR2G	8952	79	2355	31	20.7825	0.00808884	1
NFYB	ENCFF332ICQ	ENCFF801YZV	ARID2	POLR2H	8952	79	1563	14	13.7932	0.105826	1
NFYB	ENCFF332ICQ	ENCFF002CXW	ARID2	POLR3A	8952	79	16	0	0.141197	0.868318	1
NFYB	ENCFF332ICQ	ENCFF002CXT	ARID2	POLR3G	8952	79	5	0	0.0441242	0.956835	1
NFYB	ENCFF332ICQ	ENCFF990CFV	ARID2	POU5F1	8952	79	302	2	2.6651	0.247149	1
NFYB	ENCFF332ICQ	ENCFF294HEI	ARID2	PRDM10	8952	79	1321	25	11.6576	0.000258084	1
NFYB	ENCFF332ICQ	ENCFF785ACI	ARID2	PRPF4	8952	79	469	10	4.13885	0.0064797	1
NFYB	ENCFF332ICQ	ENCFF694BIA	ARID2	PTBP1	8952	79	157	9	1.3855	1.29712e-05	1
NFYB	ENCFF332ICQ	ENCFF007DKB	ARID2	PTRF	8952	79	51	0	0.450067	0.637585	1
NFYB	ENCFF332ICQ	ENCFF332DRG	ARID2	PTTG1	8952	79	42	2	0.370643	0.0474148	1
NFYB	ENCFF332ICQ	ENCFF421KIV	ARID2	PYGO2	8952	79	78	7	0.688338	7.2986e-06	0.790008
NFYB	ENCFF332ICQ	ENCFF002CXU	ARID2	RAD21	8952	79	149	49	1.3149	2.95537e-58	3.19892e-53
NFYB	ENCFF332ICQ	ENCFF096XMD	ARID2	RAD51	8952	79	2127	23	18.7704	0.053152	1
NFYB	ENCFF332ICQ	ENCFF975IRM	ARID2	RB1	8952	79	1520	52	13.4138	7.9517e-16	8.607e-11
NFYB	ENCFF332ICQ	ENCFF379MPS	ARID2	RBBP5	8952	79	894	15	7.88941	0.00818165	1
NFYB	ENCFF332ICQ	ENCFF120IDE	ARID2	RBFOX2	8952	79	2507	35	22.1239	0.00280307	1
NFYB	ENCFF332ICQ	ENCFF682SIY	ARID2	RBM14	8952	79	97	1	0.85601	0.363679	1
NFYB	ENCFF332ICQ	ENCFF971VJZ	ARID2	RBM15	8952	79	15	0	0.132373	0.876014	1
NFYB	ENCFF332ICQ	ENCFF861YKK	ARID2	RBM17	8952	79	0	0	0	1	1
NFYB	ENCFF332ICQ	ENCFF522JUV	ARID2	RBM22	8952	79	421	9	3.71526	0.00904946	1
NFYB	ENCFF332ICQ	ENCFF680WBN	ARID2	RBM25	8952	79	3467	20	30.5957	0.010953	1
NFYB	ENCFF332ICQ	ENCFF782GWS	ARID2	RBM34	8952	79	121	1	1.06781	0.367071	1
NFYB	ENCFF332ICQ	ENCFF209JJD	ARID2	RBM39	8952	79	81	2	0.714812	0.125001	1
NFYB	ENCFF332ICQ	ENCFF484CKD	ARID2	RCOR1	8952	79	331	13	2.92102	9.75193e-06	1
NFYB	ENCFF332ICQ	ENCFF580QGA	ARID2	RELA	8952	79	141	6	1.2443	0.00148536	1
NFYB	ENCFF332ICQ	ENCFF237UAN_ENCFF010UHD	ARID2	RFX1	8952	79	750	8	6.61863	0.121952	1
NFYB	ENCFF332ICQ	ENCFF716LRI	ARID2	RFX5	8952	79	575	4	5.07429	0.172804	1
NFYB	ENCFF332ICQ	ENCFF209HKW	ARID2	RLF	8952	79	270	17	2.38271	6.67326e-10	7.2232e-05
NFYB	ENCFF332ICQ	ENCFF478MPX	ARID2	SAFB	8952	79	329	6	2.90337	0.0456211	1
NFYB	ENCFF332ICQ	ENCFF624NUZ	ARID2	SAFB2	8952	79	2	0	0.0176497	0.982505	1
NFYB	ENCFF332ICQ	ENCFF718NUA	ARID2	SAP30	8952	79	676	10	5.96559	0.0403598	1
NFYB	ENCFF332ICQ	ENCFF294EHN	ARID2	SETDB1	8952	79	286	5	2.52391	0.0684015	1
NFYB	ENCFF332ICQ	ENCFF757ODD	ARID2	SFPQ	8952	79	10	0	0.0882484	0.915533	1
NFYB	ENCFF332ICQ	ENCFF191MPD	ARID2	SIN3A	8952	79	1094	11	9.65438	0.109136	1
NFYB	ENCFF332ICQ	ENCFF280GTU	ARID2	SIN3B	8952	79	744	10	6.56568	0.0577559	1
NFYB	ENCFF332ICQ	ENCFF002CXZ	ARID2	SIRT6	8952	79	107	1	0.944258	0.367286	1
NFYB	ENCFF332ICQ	ENCFF033EBX_ENCFF002CMM	ARID2	SIX5	8952	79	637	2	5.62143	0.0571885	1
NFYB	ENCFF332ICQ	ENCFF481WGW	ARID2	SKIL	8952	79	1358	36	11.9841	1.13413e-08	0.0012276
NFYB	ENCFF332ICQ	ENCFF315YAF	ARID2	SMAD1	8952	79	815	12	7.19225	0.0300944	1
NFYB	ENCFF332ICQ	ENCFF011KRN	ARID2	SMAD2	8952	79	14	0	0.123548	0.883779	1
NFYB	ENCFF332ICQ	ENCFF178MOP	ARID2	SMAD5	8952	79	2109	24	18.6116	0.0397363	1
NFYB	ENCFF332ICQ	ENCFF995NIE	ARID2	SMARCA5	8952	79	88	11	0.776586	7.13943e-10	7.72779e-05
NFYB	ENCFF332ICQ	ENCFF944GJH	ARID2	SMARCB1	8952	79	77	4	0.679513	0.00450268	1
NFYB	ENCFF332ICQ	ENCFF114PTZ	ARID2	SMARCC2	8952	79	259	12	2.28563	4.31624e-06	0.467195
NFYB	ENCFF332ICQ	ENCFF622RBW	ARID2	SMARCE1	8952	79	489	22	4.31535	1.11033e-09	0.000120183
NFYB	ENCFF332ICQ	ENCFF041YQC	ARID2	SMC3	8952	79	438	63	3.86528	1.03873e-52	1.12433e-47
NFYB	ENCFF332ICQ	ENCFF494ZUY	ARID2	SNIP1	8952	79	103	4	0.908959	0.0114607	1
NFYB	ENCFF332ICQ	ENCFF033KXY	ARID2	SNRNP70	8952	79	3	0	0.0264745	0.973873	1
NFYB	ENCFF332ICQ	ENCFF241TBP	ARID2	SOX6	8952	79	1337	39	11.7988	2.3332e-10	2.52548e-05
NFYB	ENCFF332ICQ	ENCFF300XUA	ARID2	SP1	8952	79	2565	25	22.6357	0.0705739	1
NFYB	ENCFF332ICQ	ENCFF002CMJ	ARID2	SPI1	8952	79	872	11	7.69526	0.0638693	1
NFYB	ENCFF332ICQ	ENCFF985TSH	ARID2	SREBF1	8952	79	462	6	4.07708	0.108171	1
NFYB	ENCFF332ICQ	ENCFF798URE	ARID2	SRSF1	8952	79	94	0	0.829535	0.436252	1
NFYB	ENCFF332ICQ	ENCFF722XRW	ARID2	SRSF3	8952	79	23	1	0.202971	0.165686	1
NFYB	ENCFF332ICQ	ENCFF059WVE	ARID2	SRSF7	8952	79	3	0	0.0264745	0.973873	1
NFYB	ENCFF332ICQ	ENCFF137IBM	ARID2	SRSF9	8952	79	0	0	0	1	1
NFYB	ENCFF332ICQ	ENCFF290HTJ	ARID2	STAT1_0	8952	79	77	1	0.679513	0.344421	1
NFYB	ENCFF332ICQ	ENCFF254MPF	ARID2	STAT1_1	8952	79	79	2	0.697163	0.121022	1
NFYB	ENCFF332ICQ	ENCFF498DOQ	ARID2	STAT1_2	8952	79	44	0	0.388293	0.678214	1
NFYB	ENCFF332ICQ	ENCFF648NYF	ARID2	STAT1_3	8952	79	195	8	1.72084	0.000341239	1
NFYB	ENCFF332ICQ	ENCFF841YFF	ARID2	STAT2_0	8952	79	112	2	0.988382	0.18179	1
NFYB	ENCFF332ICQ	ENCFF714VIT	ARID2	STAT2_1	8952	79	248	4	2.18856	0.107138	1
NFYB	ENCFF332ICQ	ENCFF696KPD	ARID2	STAT5A	8952	79	409	8	3.60936	0.0193373	1
NFYB	ENCFF332ICQ	ENCFF484HCG	ARID2	SUPT5H	8952	79	1504	22	13.2726	0.00776316	1
NFYB	ENCFF332ICQ	ENCFF822FWM	ARID2	TAF1	8952	79	2161	23	19.0705	0.0567047	1
NFYB	ENCFF332ICQ	ENCFF617CAZ	ARID2	TAF15	8952	79	30	0	0.264745	0.767401	1
NFYB	ENCFF332ICQ	ENCFF034CQR	ARID2	TAF7	8952	79	37	0	0.326519	0.721431	1
NFYB	ENCFF332ICQ	ENCFF785HXY	ARID2	TAF9B	8952	79	1088	9	9.60143	0.129245	1
NFYB	ENCFF332ICQ	ENCFF284LRP_ENCFF482CEV	ARID2	TAL1	8952	79	296	8	2.61215	0.0039448	1
NFYB	ENCFF332ICQ	ENCFF626MVT	ARID2	TBL1XR1	8952	79	1010	23	8.91309	3.69192e-05	1
NFYB	ENCFF332ICQ	ENCFF380FJL	ARID2	TBP	8952	79	2571	27	22.6887	0.0520352	1
NFYB	ENCFF332ICQ	ENCFF249EZR	ARID2	TCF7	8952	79	387	10	3.41521	0.00195528	1
NFYB	ENCFF332ICQ	ENCFF312RFN	ARID2	TCF7L2	8952	79	222	4	1.95912	0.0865358	1
NFYB	ENCFF332ICQ	ENCFF619BDC	ARID2	TEAD2	8952	79	142	5	1.25313	0.00735477	1
NFYB	ENCFF332ICQ	ENCFF209MQX	ARID2	TEAD4	8952	79	1125	28	9.92795	1.30699e-06	0.14147
NFYB	ENCFF332ICQ	ENCFF701MXF	ARID2	TFDP1	8952	79	1406	15	12.4077	0.0794835	1
NFYB	ENCFF332ICQ	ENCFF641LJY	ARID2	THAP1	8952	79	728	7	6.42449	0.145318	1
NFYB	ENCFF332ICQ	ENCFF671BFH	ARID2	THRA	8952	79	30	1	0.264745	0.203166	1
NFYB	ENCFF332ICQ	ENCFF294VWT	ARID2	THRAP3	8952	79	24	1	0.211796	0.171371	1
NFYB	ENCFF332ICQ	ENCFF262BVP	ARID2	TOE1	8952	79	1364	18	12.0371	0.0260258	1
NFYB	ENCFF332ICQ	ENCFF049CRW_ENCFF646VQW	ARID2	TRIM24	8952	79	277	10	2.44448	0.000182171	1
NFYB	ENCFF332ICQ	ENCFF561IZB	ARID2	TRIP13	8952	79	251	3	2.21504	0.197703	1
NFYB	ENCFF332ICQ	ENCFF036YVI	ARID2	TSC22D4	8952	79	8	0	0.0705987	0.931836	1
NFYB	ENCFF332ICQ	ENCFF730URE	ARID2	U2AF1	8952	79	234	7	2.06501	0.00402908	1
NFYB	ENCFF332ICQ	ENCFF398EQF	ARID2	U2AF2	8952	79	0	0	0	1	1
NFYB	ENCFF332ICQ	ENCFF671DOL	ARID2	UBTF	8952	79	903	23	7.96883	7.22378e-06	0.78191
NFYB	ENCFF332ICQ	ENCFF334FMW	ARID2	USF1	8952	79	2749	20	24.2595	0.0596686	1
NFYB	ENCFF332ICQ	ENCFF150VTD	ARID2	USF2	8952	79	1020	9	9.00134	0.131756	1
NFYB	ENCFF332ICQ	ENCFF186QUP	ARID2	VEZF1	8952	79	2580	46	22.7681	6.43281e-06	0.696294
NFYB	ENCFF332ICQ	ENCFF803LEC	ARID2	XRCC3	8952	79	7	1	0.0617739	0.0580734	1
NFYB	ENCFF332ICQ	ENCFF998KKJ	ARID2	XRCC5	8952	79	805	39	7.104	6.51329e-17	7.05005e-12
NFYB	ENCFF332ICQ	ENCFF706LIT	ARID2	YBX1	8952	79	3	0	0.0264745	0.973873	1
NFYB	ENCFF332ICQ	ENCFF246HIU	ARID2	YBX3	8952	79	165	0	1.4561	0.233144	1
NFYB	ENCFF332ICQ	ENCFF926FUM_ENCFF328XKC	ARID2	YY1	8952	79	1295	23	11.4282	0.00090736	1
NFYB	ENCFF332ICQ	ENCFF253FON	ARID2	ZBED1	8952	79	411	14	3.62701	2.0801e-05	1
NFYB	ENCFF332ICQ	ENCFF434QZL	ARID2	ZBTB11	8952	79	532	11	4.69482	0.00559392	1
NFYB	ENCFF332ICQ	ENCFF561USY	ARID2	ZBTB2	8952	79	733	21	6.46861	3.23151e-06	0.349782
NFYB	ENCFF332ICQ	ENCFF408FQC	ARID2	ZBTB33	8952	79	476	5	4.20063	0.163335	1
NFYB	ENCFF332ICQ	ENCFF417LEJ	ARID2	ZBTB40	8952	79	1286	19	11.3487	0.0107206	1
NFYB	ENCFF332ICQ	ENCFF706ISJ	ARID2	ZBTB7A	8952	79	1354	27	11.9488	7.26936e-05	1
NFYB	ENCFF332ICQ	ENCFF589EVD	ARID2	ZBTB8A	8952	79	14	0	0.123548	0.883779	1
NFYB	ENCFF332ICQ	ENCFF522JRK	ARID2	ZC3H11A	8952	79	160	8	1.41197	9.54734e-05	1
NFYB	ENCFF332ICQ	ENCFF809OEX	ARID2	ZC3H8	8952	79	273	23	2.40918	2.10966e-15	2.28352e-10
NFYB	ENCFF332ICQ	ENCFF521CRG	ARID2	ZFP36	8952	79	420	14	3.70643	2.60193e-05	1
NFYB	ENCFF332ICQ	ENCFF396DNK	ARID2	ZFP91	8952	79	377	8	3.32697	0.0133654	1
NFYB	ENCFF332ICQ	ENCFF433RKB	ARID2	ZFX	8952	79	920	16	8.11886	0.00507369	1
NFYB	ENCFF332ICQ	ENCFF195ODE	ARID2	ZHX1	8952	79	290	2	2.5592	0.253356	1
NFYB	ENCFF332ICQ	ENCFF163VUK	ARID2	ZKSCAN1	8952	79	665	17	5.86852	9.23108e-05	1
NFYB	ENCFF332ICQ	ENCFF529FWJ	ARID2	ZKSCAN8	8952	79	176	5	1.55317	0.0159361	1
NFYB	ENCFF332ICQ	ENCFF597DIY	ARID2	ZMIZ1	8952	79	73	1	0.644214	0.338261	1
NFYB	ENCFF332ICQ	ENCFF511QHY	ARID2	ZMYM3	8952	79	80	4	0.705987	0.0051094	1
NFYB	ENCFF332ICQ	ENCFF114IWY	ARID2	ZNF143	8952	79	1419	54	12.5225	2.97494e-18	3.2201e-13
NFYB	ENCFF332ICQ	ENCFF116DIO	ARID2	ZNF148	8952	79	844	14	7.44817	0.010804	1
NFYB	ENCFF332ICQ	ENCFF721LDD	ARID2	ZNF175	8952	79	526	12	4.64187	0.0020139	1
NFYB	ENCFF332ICQ	ENCFF853TZC	ARID2	ZNF197	8952	79	375	8	3.30932	0.0130367	1
NFYB	ENCFF332ICQ	ENCFF891MVM	ARID2	ZNF263	8952	79	94	5	0.829535	0.00142801	1
NFYB	ENCFF332ICQ	ENCFF344QKL	ARID2	ZNF274	8952	79	56	3	0.494191	0.0122718	1
NFYB	ENCFF332ICQ	ENCFF386WKY	ARID2	ZNF280A	8952	79	31	0	0.27357	0.760659	1
NFYB	ENCFF332ICQ	ENCFF581ZZT	ARID2	ZNF282	8952	79	554	11	4.88896	0.00719414	1
NFYB	ENCFF332ICQ	ENCFF921WMN	ARID2	ZNF318	8952	79	328	9	2.89455	0.00217459	1
NFYB	ENCFF332ICQ	ENCFF744SVC	ARID2	ZNF354B	8952	79	134	1	1.18253	0.362448	1
NFYB	ENCFF332ICQ	ENCFF706SJZ	ARID2	ZNF384	8952	79	618	26	5.45375	1.51331e-10	1.63803e-05
NFYB	ENCFF332ICQ	ENCFF388YOB	ARID2	ZNF395	8952	79	1005	16	8.86897	0.00985385	1
NFYB	ENCFF332ICQ	ENCFF834WGJ	ARID2	ZNF507	8952	79	2	0	0.0176497	0.982505	1
NFYB	ENCFF332ICQ	ENCFF447QUG	ARID2	ZNF512	8952	79	27	0	0.238271	0.787989	1
NFYB	ENCFF332ICQ	ENCFF815TTY	ARID2	ZNF584	8952	79	348	4	3.07105	0.171868	1
NFYB	ENCFF332ICQ	ENCFF602AXP	ARID2	ZNF589	8952	79	618	13	5.45375	0.00259553	1
NFYB	ENCFF332ICQ	ENCFF273TYA	ARID2	ZNF592	8952	79	654	19	5.77145	7.46119e-06	0.807607
NFYB	ENCFF332ICQ	ENCFF173NRW	ARID2	ZNF644	8952	79	389	5	3.43286	0.1283	1
NFYB	ENCFF332ICQ	ENCFF248AOD	ARID2	ZNF766	8952	79	817	15	7.2099	0.0041804	1
NFYB	ENCFF332ICQ	ENCFF654BMD	ARID2	ZNF83	8952	79	418	8	3.68878	0.0212582	1
NFYB	ENCFF332ICQ	ENCFF996IVU	ARID2	ZNF830	8952	79	80	3	0.705987	0.028949	1
NFYB	ENCFF332ICQ	ENCFF253NXR	ARID2	ZSCAN29	8952	79	356	18	3.14164	5.99911e-09	0.000649349
NFYB	ENCFF332ICQ	ENCFF588OLK	ARID2	ZZZ3	8952	79	153	2	1.3502	0.236256	1
NFYB	ENCFF835KAT	ENCFF836VRV	ARID3A	37104	8952	570	401	29	25.5328	0.0589609	1
NFYB	ENCFF835KAT	ENCFF396GUH	ARID3A	ADNP	8952	570	127	35	8.08646	1.75958e-12	1.90459e-07
NFYB	ENCFF835KAT	ENCFF360BTO	ARID3A	AFF1	8952	570	543	139	34.5744	7.73463e-41	8.37204e-36
NFYB	ENCFF835KAT	ENCFF010MMQ	ARID3A	ARHGAP35	8952	570	85	10	5.4122	0.0265147	1
NFYB	ENCFF835KAT	ENCFF225MPC	ARID3A	ARID1B	8952	570	675	185	42.9792	7.44786e-58	8.06164e-53
NFYB	ENCFF835KAT	ENCFF332ICQ	ARID3A	ARID2	8952	570	79	20	5.03016	2.89029e-07	0.0312848
NFYB	ENCFF835KAT	ENCFF835KAT	ARID3A	ARID3A	8952	570	570	570	36.2936	0	0
NFYB	ENCFF835KAT	ENCFF235ZZP	ARID3A	ASH1L	8952	570	2325	297	148.04	1.78089e-27	1.92765e-22
NFYB	ENCFF835KAT	ENCFF002CVM	ARID3A	ATF1	8952	570	1593	312	101.431	3.56178e-63	3.85531e-58
NFYB	ENCFF835KAT	ENCFF968KBN	ARID3A	ATF2	8952	570	826	143	52.5938	4.63997e-25	5.02235e-20
NFYB	ENCFF835KAT	ENCFF958KNK	ARID3A	ATF3	8952	570	1033	170	65.7741	4.39789e-27	4.76032e-22
NFYB	ENCFF835KAT	ENCFF710IEF	ARID3A	ATF4	8952	570	426	74	27.1247	5.87924e-14	6.36375e-09
NFYB	ENCFF835KAT	ENCFF868QLL	ARID3A	ATF7	8952	570	2939	440	187.135	5.31915e-56	5.7575e-51
NFYB	ENCFF835KAT	ENCFF423EMU	ARID3A	BACH1	8952	570	116	40	7.38606	4.14134e-17	4.48263e-12
NFYB	ENCFF835KAT	ENCFF057ZUY	ARID3A	BCOR	8952	570	382	99	24.3231	4.81309e-30	5.20973e-25
NFYB	ENCFF835KAT	ENCFF002CVP	ARID3A	BDP1	8952	570	13	5	0.827748	0.00141522	1
NFYB	ENCFF835KAT	ENCFF179NDS	ARID3A	BHLHE40	8952	570	1665	252	106.015	1.09755e-33	1.18799e-28
NFYB	ENCFF835KAT	ENCFF048OIZ	ARID3A	BMI1	8952	570	278	39	17.7011	4.73065e-06	0.51205
NFYB	ENCFF835KAT	ENCFF549GMO	ARID3A	BRCA1	8952	570	1	0	0.0636729	0.938312	1
NFYB	ENCFF835KAT	ENCFF714XHL	ARID3A	BRD4	8952	570	160	25	10.1877	3.86167e-05	1
NFYB	ENCFF835KAT	ENCFF666LZV	ARID3A	BRD9	8952	570	305	83	19.4202	7.85101e-27	8.49801e-22
NFYB	ENCFF835KAT	ENCFF002CVR	ARID3A	BRF1	8952	570	10	5	0.636729	0.000461386	1
NFYB	ENCFF835KAT	ENCFF002CVS	ARID3A	BRF2	8952	570	7	1	0.44571	0.285419	1
NFYB	ENCFF835KAT	ENCFF996ZGL	ARID3A	C11orf30	8952	570	1723	230	109.708	5.24395e-24	5.67611e-19
NFYB	ENCFF835KAT	ENCFF642BNC	ARID3A	CBFA2T2	8952	570	1271	138	80.9283	2.14374e-09	0.00023204
[truncated: 106,242 more rows]
